# Supplementary material for: Discovery of the 3-Amino-1,2,4-triazine-Based Library as Selective PDK1 Inhibitors with Therapeutic Potential in Highly Aggressive Pancreatic Ductal Adenocarcinoma
Source: MDPI journal article supplement (doi:10.3390/ijms24043679), 2023-02-12
Supplement: s1 [file s1]

# Discovery of the 3-Amino-1,2,4-triazine-based Library as Selective PDK1 Inhibitors with Therapeutic Potential in Highly Aggressive Pancreatic Ductal Adenocarcinoma

Daniela Carbone<sup>1†</sup>, Michele De Franco<sup>2†</sup>, Camilla Pecoraro<sup>1</sup>, Davide Bassani<sup>3</sup>, Matteo Pavan<sup>3</sup>, Stella Cascioferro<sup>1</sup>, Barbara Parrino<sup>1</sup>, Girolamo Cirrincione<sup>1</sup>, Stefano Dall'Acqua<sup>2</sup>, Stefano Moro<sup>3</sup>, Valentina Gandin<sup>2\*</sup> and Patrizia Diana<sup>1\*</sup>

<sup>1</sup> Department of Biological, Chemical, and Pharmaceutical Sciences and Technologies (STEBICEF), University of Palermo, Via Archirafi 32, 90123, Palermo, Italy

<sup>2</sup> Department of Pharmaceutical and Pharmacological Sciences, University of Padova, Via F. Marzolo 5, 35131, Padova, Italy

<sup>3</sup> Molecular Modeling Section (MMS), Department of Pharmaceutical and Pharmacological Sciences, University of Padova, Via F. Marzolo 5, 35131 Padova, Italy

\* Correspondence: patrizia.diana@unipa.it (P.D.); valentina.gandin@unipd.it (V.G.)

† These authors contributed equally to this work.

## Table of Contents

| Contents                                                                                                                                         | Page  | Table/Figure     |
|--------------------------------------------------------------------------------------------------------------------------------------------------|-------|------------------|
| Experimental data for synthesized compounds <b>4a-ab</b> , <b>5a-ab</b> , <b>6h-ab</b>                                                           | 1-12  | -                |
| 3-Amino-1,2,4-triazine derivatives <b>5,6</b> and their relative yields                                                                          | 13    | Table S1         |
| <sup>1</sup> H NMR spectra of synthesized compounds <b>5a-ab</b> , <b>6h-ab</b>                                                                  | 14-62 | Figures S1-S49   |
| Chromatograms and MS spectra of synthesized compounds <b>5a-ab</b> , <b>6h-ab</b>                                                                | 63-87 | Figures S50-S98  |
| Antiproliferative activity of compounds <b>5a-ab</b> and <b>6h-ab</b> against PSN-1 and BxPC3 cancer cells evaluated in a 2D cytotoxicity assay. | 88    | Table S2         |
| Antiproliferative activity of compounds <b>5a-ab</b> and <b>6h-ab</b> against PSN-1 and BxPC3 cancer cells evaluated in a 3D cytotoxicity assay. | 89    | Table S3         |
| Molecular modeling supplementary images                                                                                                          | 90-91 | Figures S99-S102 |

## Experimental data

*Bis(1H-indol-3-yl)ethane-1,2-dione (4a)*. Yield: 62% from indole **1a** (R=H) and acyl chloride **3a** (R<sup>2</sup>=H, R<sup>3</sup>=H); yellow solid; m.p.: 273.3 °C; IR (cm<sup>-1</sup>): 3301 (NH), 1601 (CO); <sup>1</sup>H NMR (DMSO-*d*<sub>6</sub>, 200 MHz) δ: 7.32-7.38 (m, 4H), 7.58-7.62 (m, 2H), 8.28-8.35 (m, 4H), 12.32 (s, 2H); <sup>13</sup>C{<sup>1</sup>H} NMR (DMSO-*d*<sub>6</sub>, 50 MHz) δ: 112.4, 112.5, 121.3, 122.4, 123.4, 125.6, 136.7, 137.3, 188.8; *Anal.* Calculated for C<sub>18</sub>H<sub>12</sub>N<sub>2</sub>O<sub>2</sub> (MW: 288.30) C, 74.99; H, 4.20; N, 9.72%. Found: C, 74.71; H, 4.45; N, 9.59%.

*Bis(5-bromo-1H-indol-3-yl)ethane-1,2-dione (4b)*. Yield: 66% from indole **1b** (R=Br) and acyl chloride **3b** (R<sup>2</sup>=Br, R<sup>3</sup>=H); yellow solid; m.p. 273.3 °C; IR (cm<sup>-1</sup>): 3173 (NH), 1625 (CO); <sup>1</sup>H NMR (DMSO-*d*<sub>6</sub>, 200 MHz) δ: 7.44 (dd, 2H, *J*=8.6, 1.9 Hz), 7.53 (d, 2H, *J*=8.6 Hz), 8.35 (s, 2H), 8.43 (d, 2H, *J*=1.9 Hz), 12.47 (s, 2H); <sup>13</sup>C{<sup>1</sup>H} NMR (DMSO-*d*<sub>6</sub>, 50 MHz) δ: 111.7, 114.7, 115.2, 123.4, 126.1, 127.4, 135.5, 138.6, 187.8; *Anal.* Calculated for C<sub>18</sub>H<sub>10</sub>Br<sub>2</sub>N<sub>2</sub>O<sub>2</sub> (MW: 446.09) C, 48.46; H, 2.26; N, 6.28%. Found: C, 48.64; H, 2.09; N, 6.47%.

*Bis(5-fluoro-1H-indol-3-yl)ethane-1,2-dione (4c)*. Yield: 61% from indole **1c** (R=F) and acyl chloride **3c** (R<sup>2</sup>=F, R<sup>3</sup>=H); brown solid; m.p.: 392.0 °C; IR (cm<sup>-1</sup>): 3207 (NH), 1608 (CO); <sup>1</sup>H NMR (DMSO-*d*<sub>6</sub>, 200 MHz) δ: 7.17 (td, 2H, *J*=9.3, 9.1, 2.6 Hz), 7.57 (dd, 2H, *J*=9.1, 4.5 Hz), 7.96 (dd, 2H, *J*=9.8, 2.6 Hz), 8.40 (d, 2H, *J*=3.2 Hz), 12.40 (s, 2H); <sup>13</sup>C{<sup>1</sup>H} NMR (DMSO-*d*<sub>6</sub>, 50 MHz) δ: 106.2 (d, *J*=24.9 Hz), 111.6 (d, *J*=26.2 Hz), 112.4 (d, *J*=4.4 Hz), 113.9 (d, *J*=10.1 Hz), 126.3 (d, *J*=11.1 Hz), 133.3, 138.9, 158.9 (d, *J*=235.6 Hz), 188.0; *Anal.* Calculated for C<sub>18</sub>H<sub>10</sub>F<sub>2</sub>N<sub>2</sub>O<sub>2</sub> (MW: 324.28) C, 66.67; H, 3.11; N, 8.64%. Found: C, 66.47; H, 3.31; N, 8.83%.

*Bis(5-methoxy-1H-indol-3-yl)ethane-1,2-dione (4d)*. Yield: 67% from indole **1d** (R=OCH<sub>3</sub>) and acyl chloride **3d** (R<sup>2</sup>=OCH<sub>3</sub>, R<sup>3</sup>=H); gray solid; m.p.: 303.3 °C; IR (cm<sup>-1</sup>): 3186 (NH), 1608 (CO); <sup>1</sup>H NMR (DMSO-*d*<sub>6</sub>, 200 MHz) δ: 3.84 (s, 6H), 6.92 (dd, 2H, *J*=8.8, 2.5 Hz), 7.44 (d, 2H, *J*=8.8 Hz), 7.80 (d, 2H, *J*=2.5 Hz), 8.18 (s, 2H), 12.15 (s, 2H); <sup>13</sup>C{<sup>1</sup>H} NMR (DMSO-*d*<sub>6</sub>, 50 MHz) δ: 55.2, 103.0, 112.3, 113.2, 113.3, 126.5, 131.4, 137.3, 155.8, 188.7; *Anal.* Calculated for C<sub>20</sub>H<sub>16</sub>N<sub>2</sub>O<sub>4</sub> (MW: 348.35) C, 68.96; H, 4.63; N, 8.04%. Found: C, 68.74; H, 4.81; N, 8.18%.

*Bis(1-methyl-1H-indol-3-yl)ethane-1,2-dione (4e)*. Yield: 81% from indole **2a** (R=H) and acyl chloride **3e** (R<sup>2</sup>=H, R<sup>3</sup>=CH<sub>3</sub>); yellow solid; m.p.: 267.0 °C; IR (cm<sup>-1</sup>): 1625 (CO); <sup>1</sup>H NMR (DMSO-*d*<sub>6</sub>, 200 MHz) δ: 3.89 (s, 6H), 7.31-7.41 (m, 4H), 7.58-7.64 (m, 2H), 8.29-8.33 (m, 4H); <sup>13</sup>C{<sup>1</sup>H} NMR (DMSO-*d*<sub>6</sub>, 50 MHz) δ: 33.2, 111.0, 111.2, 121.4, 122.8, 123.5, 126.0, 137.4, 140.8, 188.2; *Anal.* Calculated for C<sub>20</sub>H<sub>16</sub>N<sub>2</sub>O<sub>2</sub> (MW: 316.35) C, 75.93; H, 5.10; N, 8.86%. Found: C, 76.04; H, 5.25; N, 8.94%.

*Bis(5-fluoro-1-methyl-1H-indol-3-yl)ethane-1,2-dione (4f)*. Yield: 72% from indole **2c** (R=F) and acyl chloride **3g** (R<sup>2</sup>=F, R<sup>3</sup>=CH<sub>3</sub>); yellow solid; m.p.: 312.5 °C; IR (cm<sup>-1</sup>): 1621 (CO); <sup>1</sup>H NMR (200 MHz, DMSO-*d*<sub>6</sub>) δ: 3.90 (s, 6H), 7.24 (td, 2H, *J*=9.2, 9.2, 2.6 Hz), 7.66 (dd, 2H, *J*=9.2, 4.5 Hz), 7.96 (dd, 2H, *J*=9.7, 2.6 Hz), 8.40 (s, 2H); <sup>13</sup>C{<sup>1</sup>H} NMR (DMSO-*d*<sub>6</sub>, 50 MHz) δ: 34.1, 106.9 (d, *J*=24.7 Hz), 111.6 (d, *J*=3.9 Hz), 112.1 (d, *J*=26.0 Hz), 113.2 (d, *J*=10.1 Hz), 127.3 (d, *J*=11.0 Hz), 134.6, 142.6, 159.8 (d, *J*=236.3 Hz), 187.9; *Anal.* Calculated for C<sub>20</sub>H<sub>14</sub>F<sub>2</sub>N<sub>2</sub>O<sub>2</sub> (MW: 352.33) C, 68.18; H, 4.01; N, 7.95%. Found: C, 68.32; H, 4.25; N, 7.76%.

*Bis(5-methoxy-1-methyl-1H-indol-3-yl)ethane-1,2-dione (4g)*. Yield: 73% from indole **2d** (R=OCH<sub>3</sub>) and acyl chloride **3e** (R<sup>2</sup>=OCH<sub>3</sub>, R<sup>3</sup>=CH<sub>3</sub>); yellow solid; m.p.: 244.1 °C; IR (cm<sup>-1</sup>): 1612 (CO); <sup>1</sup>H NMR (DMSO-*d*<sub>6</sub>, 200 MHz) δ: 3.85 (s, 6H), 3.86 (s, 6H), 6.99 (dd, 2H, *J*=8.9, 2.5 Hz), 7.52 (d, 2H, *J*=8.9 Hz), 7.82 (d, 2H, *J*=2.5 Hz), 8.25 (s, 2H); <sup>13</sup>C{<sup>1</sup>H} NMR (DMSO-*d*<sub>6</sub>, 50 MHz) δ: 33.4, 55.4, 103.1, 111.0, 111.9, 113.1, 127.0, 132.3, 140.7, 156.2, 188.0; *Anal.* Calculated for C<sub>22</sub>H<sub>20</sub>N<sub>2</sub>O<sub>4</sub> (MW: 376.41) C, 70.20; H, 5.36; N, 7.44%. Found: C, 70.35; H, 5.14; N, 7.68%.

*1-(5-Bromo-1H-indol-3-yl)-2-(5-methoxy-1-methyl-1H-indol-3-yl)ethane-1,2-dione (4h)*. Yield: 66% from indole **2d** (R=OCH<sub>3</sub>) and acyl chloride **3b** (R<sup>2</sup>=Br, R<sup>3</sup>=H); yellow solid; m.p.: 273.8 °C; IR (cm<sup>-1</sup>): 3210 (NH), 1629 (CO), 1601 (CO); <sup>1</sup>H NMR (DMSO-*d*<sub>6</sub>, 200 MHz) δ: 3.85 (s, 3H), 3.86 (s, 1H), 6.99 (dd, 1H, *J*=8.9, 2.5 Hz), 7.41-7.55 (m, 3H), 7.81 (d, 1H, *J*=2.6 Hz), 8.26 (s, 1H), 8.33 (s, 1H), 8.44 (d, 1H, *J*=1.6 Hz), 12.45 (s, 1H); <sup>13</sup>C{<sup>1</sup>H} NMR (DMSO-*d*<sub>6</sub>, 50 MHz) δ: 34.1, 55.3, 103.2, 110.8, 111.9, 112.0, 113.1, 114.7, 115.2, 123.4, 126.0, 127.0, 127.4, 132.3, 135.4, 138.4, 141.0, 156.3, 187.4, 188.5; *Anal.* Calculated for C<sub>20</sub>H<sub>15</sub>BrN<sub>2</sub>O<sub>3</sub> (MW: 411.25) C, 58.41; H, 3.68; N, 6.81%. Found: C, 58.54; H, 3.82; N, 6.94%.

1-(5-Bromo-1-methyl-1H-indol-3-yl)-2-(5-bromo-1H-indol-3-yl)ethane-1,2-dione (**4i**). Yield: 73% from indole **2b** (R=Br) and acyl chloride **3b** (R<sup>2</sup>= Br, R<sup>3</sup>=H); yellow solid; m.p.: 336.6 °C; IR (cm<sup>-1</sup>): 3317 (NH), 1622 (CO), 1611 (CO); <sup>1</sup>H NMR (DMSO-*d*<sub>6</sub>, 200 MHz) δ: 3.89 (s, 3H), 7.44 (dd, 1H, *J* = 8.6, 1.9 Hz), 7.48-7.55 (m, 2H), 7.62 (d, 1H, *J* = 8.7 Hz), 8.35 (d, 1H, *J* = 3.2 Hz), 8.41-8.44 (m, 3H), 12.49 (s, 1H); <sup>13</sup>C{<sup>1</sup>H} NMR (DMSO-*d*<sub>6</sub>, 50 MHz) δ: 33.5, 110.5, 111.7, 113.3, 114.7, 115.2, 115.8, 123.4, 123.5, 126.0, 126.1, 127.4, 127.8, 135.5, 136.2, 138.7, 142.0, 187.3, 187.8; *Anal.* Calculated for C<sub>19</sub>H<sub>12</sub>Br<sub>2</sub>N<sub>2</sub>O<sub>2</sub> (MW: 460.12) C, 49.60; H, 2.63; N, 6.09%. Found: C, 49.74; H, 2.51; N, 6.25%.

1-(5-Bromo-1H-indol-3-yl)-2-(1-methyl-1H-indol-3-yl)ethane-1,2-dione (**4j**). Yield: 75% from indole **2a** (R=H) and acyl chloride **3b** (R<sup>2</sup>= Br, R<sup>3</sup>=H); yellow solid; m.p.: 289.8 °C; IR (cm<sup>-1</sup>): 3318 (NH), 1624 (CO), 1608 (CO); <sup>1</sup>H NMR (DMSO-*d*<sub>6</sub>, 200 MHz) δ: 3.88 (s, 3H), 7.31-7.38 (m, 2H), 7.43 (dd, 1H, *J* = 8.6, 2.0 Hz), 7.5 (d, 1H, *J* = 8.6 Hz), 7.60 (dd, 1H, *J* = 6.3, 2.4 Hz), 8.28- 8.33 (m, 3H) 8.43 (d, 1H, *J* = 2.0 Hz) 12.42 (s, 1H); <sup>13</sup>C{<sup>1</sup>H} NMR (DMSO-*d*<sub>6</sub>, 50 MHz) δ: 34.0, 106.7, 107.1, 112.2, 112.8, 113.1, 121.8, 122.9, 124.0, 126.1, 127.2, 134.6, 137.2, 138.0, 142.4, 158.2, 161.3, 188.4, 188.7; *Anal.* Calculated for C<sub>19</sub>H<sub>13</sub>BrN<sub>2</sub>O<sub>2</sub> (MW: 381.22) C, 59.86; H, 3.44; N, 7.35%. Found: C, 59.74; H, 3.61; N, 7.15%.

1-(5-Bromo-1H-indol-3-yl)-2-(5-fluoro-1-methyl-1H-indol-3-yl)ethane-1,2-dione (**4k**). Yield: 60% from indole **2c** (R=F) and acyl chloride **3b** (R<sup>2</sup>= Br, R<sup>3</sup>=H); yellow solid; m.p.: 225.0 °C; IR (cm<sup>-1</sup>): 3319 (NH), 1636 (CO), 1610 (CO); <sup>1</sup>H NMR (DMSO-*d*<sub>6</sub>, 200 MHz) δ: 3.89 (s, 3H), 7.22 (td, 1H, *J* = 9.2, 9.2, 2.6 Hz), 7.43 (dd, 1H, *J* = 8.6, 2.0 Hz), 7.52 (d, 1H, *J* = 8.6 Hz), 7.64 (dd, 1H, *J* = 9.0, 4.4 Hz), 7.95 (dd, 1H, *J* = 9.6, 2.6 Hz), 8.33 (s, 1H), 8.42 (m, 2H), 12.44 (s, 1H); <sup>13</sup>C{<sup>1</sup>H} NMR (DMSO-*d*<sub>6</sub>, 50 MHz) δ: 34.1, 106.9 (d, *J* = 24.9 Hz), 111.6 (d, *J* = 4.0 Hz), 112.1 (d, *J* = 26.0 Hz), 112.3, 113.2 (d, *J* = 9.9 Hz), 115.2, 115.7, 123.9, 126.6, 127.3 (d, *J* = 11.0 Hz), 127.9, 134.6, 136.0, 139.0, 142.7, 159.8 (d, *J* = 236.6 Hz), 187.6, 188.5; *Anal.* Calculated for C<sub>19</sub>H<sub>12</sub>BrFN<sub>2</sub>O<sub>2</sub> (MW: 399.21) C, 57.16; H, 3.03; N, 7.02%. Found: C, 57.33; H, 3.30; N, 6.85%.

1-(5-Bromo-1-methyl-1H-indol-3-yl)-2-(1H-indol-3-yl)ethane-1,2-dione (**4l**). Yield: 69% from indole **2b** (R=Br) and acyl chloride **3a** (R<sup>2</sup>= H, R<sup>3</sup>=H); yellow solid; m.p.: 262.0 °C; IR (cm<sup>-1</sup>): 3204 (NH), 1629 (CO), 1607 (CO); <sup>1</sup>H NMR (DMSO-*d*<sub>6</sub>, 200 MHz) δ: 3.89 (s, 3H), 7.25-7.34 (m, 2H), 7.48-7.64 (m, 3H), 8.26-8.30 (m, 2H), 8.38 (s, 1H), 8.42 (d, 1H), 12.31 (s, 1H); <sup>13</sup>C{<sup>1</sup>H} NMR (DMSO-*d*<sub>6</sub>, 50 MHz) δ: 33.4, 110.7, 112.2, 112.3, 113.3, 115.7, 121.2, 122.5, 123.5, 125.6, 126.0, 126.1, 127.8, 136.2, 137.7, 136.7, 141.7, 188.0, 188.1; *Anal.* Calculated for C<sub>19</sub>H<sub>13</sub>BrN<sub>2</sub>O<sub>2</sub> (MW: 381.22): C, 59.86; H, 3.44; N, 7.35%. Found: C, 59.98; H, 3.57; N, 7.11%.

1-(1H-Indol-3-yl)-2-(1-methyl-1H-indol-3-yl)ethane-1,2-dione (**4m**). Yield: 77% from indole **1a** (R=H) and acyl chloride **3e** (R<sup>2</sup>= H, R<sup>3</sup>=CH<sub>3</sub>); yellow solid; m.p.: 226.9 °C; IR (cm<sup>-1</sup>): 3410 (NH), 1624 (CO), 1607 (CO); <sup>1</sup>H NMR (DMSO-*d*<sub>6</sub>, 200 MHz) δ: 3.89 (s, 3H), 7.27-7.41 (m, 4H), 7.53-7.64 (m, 2H), 8.23-8.32 (m, 4H), 12.28 (s, 1H); <sup>13</sup>C{<sup>1</sup>H} NMR (DMSO-*d*<sub>6</sub>, 50 MHz) δ: 33.3, 99.5, 111.0, 111.3, 112.6, 121.2, 121.4, 122.4, 122.5, 122.8, 123.5, 125.5, 126.0, 137.0, 137.3, 137.4, 140.7, 188.2, 188.7; *Anal.* Calculated for C<sub>19</sub>H<sub>14</sub>N<sub>2</sub>O<sub>2</sub> (MW: 302.33) C, 75.48; H, 4.67; N, 9.27%. Found: C, 75.33; H, 4.76; N, 9.12%.

1-(1H-Indol-3-yl)-2-(5-methoxy-1-methyl-1H-indol-3-yl)ethane-1,2-dione (**4n**). Yield: 72% from indole **2d** (R=OCH<sub>3</sub>) and acyl chloride **3a** (R<sup>2</sup>= H, R<sup>3</sup>=H); yellow solid; m.p.: 243.8 °C; IR (cm<sup>-1</sup>): 3182 (NH), 1622 (CO), 1600 (CO); <sup>1</sup>H NMR (DMSO-*d*<sub>6</sub>, 200 MHz) δ: 3.85 (m, 6H), 6.98 (dd, 1H, *J* = 8.9, 2.4 Hz), 7.28 – 7.31 (m, 2H), 7.49 – 7.56 (m, 2H), 7.82 (d, 1H, *J* = 2.4 Hz), 8.22 – 8.30 (m, 3H), 12.22 (s, 1H); <sup>13</sup>C{<sup>1</sup>H} NMR (DMSO-*d*<sub>6</sub>, 50 MHz) δ: 33.8, 55.8, 103.8, 111.5, 112.4, 112.9, 113.0, 113.5, 121.8, 122.9, 123.9, 126.1, 127.5, 132.8, 137.2, 137.8, 141.1, 156.7, 188.6, 189.2; *Anal.* Calculated for C<sub>20</sub>H<sub>16</sub>N<sub>2</sub>O<sub>2</sub> (MW: 332.35) C, 72.28; H, 4.85; N, 8.43%. Found: C, 72.48; H, 4.73; N, 8.12%.

1-(5-Fluoro-1-methyl-1H-indol-3-yl)-2-(1H-indol-3-yl)-ethane-1,2-dione (**4o**). Yield: 79% from indole **1a** (R=H) and acyl chloride **3f** (R<sup>2</sup>= F, R<sup>3</sup>=CH<sub>3</sub>); yellow solid; m.p.: 235.2 °C; IR (cm<sup>-1</sup>): 3219 (NH), 1622 (CO), 1604 (CO); <sup>1</sup>H NMR (DMSO-*d*<sub>6</sub>, 200 MHz) δ: 3.89 (s, 3H), 7.3- 7.39 (m, 2H), 7.44 (dd, 1H, *J* = 8.6, 1.9 Hz), 7.53 (d, 1H, *J* = 8.6 Hz), 7.59-7.62 (m, 1H), 8.28 – 8.33 (m, 3H), 8.43- 8.44 (m, 1H), 12.43 (1H, s); <sup>13</sup>C{<sup>1</sup>H} NMR (DMSO-*d*<sub>6</sub>, 50 MHz) δ: 34.0, 106.9 (d, *J* = 23.9 Hz), 111.7 (d, *J* = 3.9 Hz), 112.0 (d, *J* = 26.0 Hz), 112.8, 113.0 (d, *J* = 10.1 Hz), 113.1, 121.8, 122.9, 124.0, 126.1, 127.3 (d, *J* = 11.3 Hz), 134.6, 137.2, 138.0, 142.4, 159.7 (d, *J* = 236.3 Hz), 188.4, 188.8; *Anal.* Calculated for C<sub>19</sub>H<sub>13</sub>FN<sub>2</sub>O<sub>2</sub> (MW: 320.32) C, 71.24; H, 4.09; N, 8.75%. Found: C, 71.38; H, 4.23; N, 8.52%.

1-(5-Methoxy-1H-indol-3-yl)-2-(1-methyl-1H-indol-3-yl)ethane-1,2-dione (**4p**). Yield: 80% from indole **2a** (R=H) and acyl chloride **3d** (R<sup>2</sup>= OCH<sub>3</sub>, R<sup>3</sup>=H); yellow solid; m.p.: 245.8 °C; IR (cm<sup>-1</sup>): 3153 (NH), 1618 (CO), 1602 (CO); <sup>1</sup>H NMR (DMSO-*d*<sub>6</sub>, 200 MHz) δ: 3.83 (s, 3H), 3.89 (s, 3 H), 6.92 (dd, 1H, *J* = 8.8, 2.5 Hz), 7.28 – 7.40 (m, 2H), 7.44 (d, 1H, *J* = 8.8 Hz), 7.59– 7.62 (m, 1H), 7.80 (d, 1H, *J* = 2.5 Hz), 8.16 (d, 1H, *J* = 3.3 Hz), 8.29–8.31 (m, 2H), 12.14 (s, 1H); <sup>13</sup>C{<sup>1</sup>H} NMR (DMSO-*d*<sub>6</sub>, 50 MHz) δ: 33.7, 55.8, 103.6, 111.5, 111.8, 112.8, 113.7, 113.8, 121.9, 123.3, 123.9, 126.6, 127.0, 132.0, 137.8, 137.9, 141.2, 156.4, 188.7, 189.0; *Anal.* Calculated for C<sub>20</sub>H<sub>16</sub>N<sub>2</sub>O<sub>2</sub> (MW: 332.35) C, 72.28; H, 4.85; N, 8.43%. Found: C, 72.48; H, 4.99; N, 8.62%.

1-(5-Methoxy-1H-indol-3-yl)-2-(5-methoxy-1-methyl-1H-indol-3-yl)ethane-1,2-dione (**4q**). Yield: 69% from indole **2d** (R=OCH<sub>3</sub>) and acyl chloride **3d** (R<sup>2</sup>= OCH<sub>3</sub>, R<sup>3</sup>=H); yellow solid; m.p.: 302.6 °C; IR (cm<sup>-1</sup>): 3238 (NH), 1608 (CO b.s.); <sup>1</sup>H NMR (DMSO-*d*<sub>6</sub>, 200 MHz) δ: 3.83 (s, 9H), 6.91 (dd, 1H, *J* = 8.8, 2.5 Hz), 6.97 (dd, 1H, *J* = 8.9, 2.5 Hz), 7.43 (d, 1H, *J* = 8.8 Hz), 7.49 (d, 1H, *J* = 8.9 Hz), 7.79–7.81 (m, 2H), 8.16 (s, 1H), 8.23 (s, 1H), 12.13 (s, 1H). <sup>13</sup>C{<sup>1</sup>H} NMR (DMSO-*d*<sub>6</sub>, 50 MHz) δ: 33.8, 55.8, 55.9, 103.6, 103.8, 111.6, 112.4, 112.8, 113.5, 113.7, 113.8, 127.0, 127.5, 131.9, 132.8, 137.9, 141.1, 156.3, 156.7, 188.6, 189.1; *Anal.* Calculated for C<sub>21</sub>H<sub>18</sub>N<sub>2</sub>O<sub>2</sub> (MW: 362.38) C, 69.60; H, 5.01; N, 7.73%. Found: C, 69.48; H, 4.83; N, 7.52%.

1-(5-Fluoro-1-methyl-1H-indol-3-yl)-2-(5-methoxy-1-methyl-1H-indol-3-yl)ethane-1,2-dione (**4r**). Yield: 76% from indole **2c** (R=F) and acyl chloride **3d** (R<sup>2</sup>= OCH<sub>3</sub>, R<sup>3</sup>=H); yellow solid; m.p.: 308.2 °C; IR (cm<sup>-1</sup>): 3196 (NH), 1620 (CO), 1600 (CO); <sup>1</sup>H NMR (DMSO-*d*<sub>6</sub>, 200 MHz) δ: 3.84 (s, 3H), 3.90 (s, 3H), 6.93 (dd, 1H, *J* = 8.8, 2.5 Hz), 7.22 (td, 1H, *J* = 9.2, 9.1, 2.6 Hz), 7.45 (d, 1H, *J* = 8.8 Hz), 7.64 (dd, 1H, *J* = 8.9, 4.4 Hz), 7.81 (d, 1H, *J* = 2.5 Hz), 8.04 – 7.91 (m, 1H), 8.20 (d, 1H, *J* = 3.3 Hz), 8.40 (s, 1H), 12.17 (s, 1H); <sup>13</sup>C{<sup>1</sup>H} NMR (DMSO-*d*<sub>6</sub>, 50 MHz) δ: 34.0, 55.8, 103.6, 106.9 (d, *J* = 23.9 Hz), 111.8 (d, *J* = 4.2 Hz), 112.5 (d, *J* = 26.2 Hz), 112.7, 113.0 (d, *J* = 10.1 Hz), 113.8, 127.0, 127.3 (d, *J* = 11.3 Hz), 132.0, 134.6, 137.9, 138.0, 142.4, 156.4, 159.8 (d, *J* = 236.3 Hz), 188.4, 188.6. *Anal.* Calculated for C<sub>20</sub>H<sub>15</sub>FN<sub>2</sub>O<sub>3</sub> (MW: 350.34) C, 68.57; H, 4.32; N, 8.00%. Found: C, 68.38; H, 4.53; N, 7.72%.

1-(5-Bromo-1-methyl-1H-indol-3-yl)-2-(5-methoxy-1H-indol-3-yl)ethane-1,2-dione (**4s**). Yield: 78% from indole **2b** (R=Br) and acyl chloride **3d** (R<sup>2</sup>= OCH<sub>3</sub>, R<sup>3</sup>=H); yellow solid; m.p.: 320.7 °C; IR (cm<sup>-1</sup>): 3184 (NH), 1627 (CO), 1600 (CO); <sup>1</sup>H NMR (DMSO-*d*<sub>6</sub>, 200 MHz) δ: 3.84 (s, 3H), 3.89 (s, 3H), 6.93 (dd, 1H, *J* = 8.8, 2.4 Hz), 7.44 (d, 1H, *J* = 8.8), 7.50 (dd, 1H, *J* = 8.7, 1.8 Hz), 7.61 (d, 1H, *J* = 8.7 Hz), 7.80 (d, 1H, *J* = 2.4 Hz), 8.20 (d, 1H, *J* = 3.3 Hz), 8.39 (s, 1H), 8.44 (d, 1H, *J* = 1.8 Hz), 12.18 (s, 1H); <sup>13</sup>C{<sup>1</sup>H} NMR (DMSO-*d*<sub>6</sub>, 50 MHz) δ: 33.9, 55.8, 103.6, 103.7, 111.3, 112.6, 113.7, 113.8, 116.2, 124.1, 126.5, 127.0, 128.3, 132.0, 136.7, 138.1, 142.2, 156.4, 188.4, 188.5; *Anal.* Calculated for C<sub>20</sub>H<sub>15</sub>BrN<sub>2</sub>O<sub>3</sub> (MW: 411.25) C, 58.41; H, 3.68; N, 6.81%. Found: C, 58.68; H, 3.53; N, 6.75%.

1-(5-Bromo-1-methyl-1H-indol-3-yl)-2-(5-fluoro-1H-indol-3-yl)ethane-1,2-dione (**4t**). Yield: 77% from indole **2b** (R=Br) and acyl chloride **3c** (R<sup>2</sup>= F, R<sup>3</sup>=H); orange solid; m.p.: 294.3 °C; IR (cm<sup>-1</sup>): 3183 (NH), 1640 (CO), 1606 (CO); <sup>1</sup>H NMR (DMSO-*d*<sub>6</sub>, 200 MHz) δ: 3.89 (s, 3H), 7.16 (td, 1H, *J* = 9.4, 9.1, 2.6 Hz), 7.48–7.64 (m, 3H), 7.95 (dd, 1H, *J* = 9.7, 2.6 Hz), 8.35–8.44 (m, 3H), 12.34 (s, 1H); <sup>13</sup>C{<sup>1</sup>H} NMR (DMSO-*d*<sub>6</sub>, 50 MHz) δ: 33.5, 106.2 (d, *J* = 24.5 Hz), 110.6, 111.6 (d, *J* = 26.2 Hz), 112.3 (s, *J* = 4.6 Hz), 113.3, 113.9 (d, *J* = 10.4 Hz), 115.7, 123.5, 126.0, 126.3 (d, *J* = 11.1 Hz), 127.8, 133.3, 136.2, 139.0, 141.8, 158.9 (d, *J* = 235.7 Hz), 187.5, 187.8; *Anal.* Calculated for C<sub>19</sub>H<sub>12</sub>BrFN<sub>2</sub>O<sub>2</sub> (MW: 399.21): C, 57.16; H, 3.03; N, 7.02%. Found: C, 57.26; H, 3.12; N, 7.33%.

1-(5-Fluoro-1H-indol-3-yl)-2-(5-methoxy-1-methyl-1H-indol-3-yl)ethane-1,2-dione (**4u**). Yield: 78% from indole **2d** (R=OCH<sub>3</sub>) and acyl chloride **3c** (R<sup>2</sup>= F, R<sup>3</sup>=H); yellow solid; m.p.: 226.9 °C; IR (cm<sup>-1</sup>): 3427 (NH), 1646 (CO), 1612 (CO); <sup>1</sup>H NMR (DMSO-*d*<sub>6</sub>, 200 MHz) δ: 3.85 (s, 3H), 3.86 (s, 3H), 6.99 (dd, 1H, *J* = 8.9, 2.5 Hz), 7.16 (td, 1H, *J* = 9.0, 9.0, 2.3 Hz), 7.50–7.60 (m, 2H), 7.81 (d, 1H, *J* = 2.5 Hz), 7.95 (dd, 1H, *J* = 9.8, 2.3 Hz), 8.25 (s, 1H), 8.33 (d, 1H, *J* = 3.1 Hz), 12.35 (s, 1H); <sup>13</sup>C{<sup>1</sup>H} NMR (DMSO-*d*<sub>6</sub>, 50 MHz) δ: 33.9, 55.8, 103.8, 106.7 (d, *J* = 24.5 Hz), 111.4, 112.0 (d, *J* = 25.6 Hz), 112.4, 113.0 (d, *J* = 4.2 Hz), 113.6, 114.4 (d, *J* = 9.9 Hz), 126.8 (d, *J* = 11.2 Hz), 127.5, 132.8, 133.8, 139.2, 141.3, 156.8, 159.4 (s, *J* = 235.5 Hz), 188.1, 189.0; *Anal.* Calculated for C<sub>20</sub>H<sub>15</sub>FN<sub>2</sub>O<sub>3</sub> (MW: 350.34): C, 68.57; H, 4.32; N, 8.00%. Found: C, 68.51; H, 4.47; N, 7.84%.

1-(5-Fluoro-1H-indol-3-yl)-2-(1-methyl-1H-indol-3-yl)ethane-1,2-dione (**4v**). Yield: 72% from indole **2a** (R=H) and acyl chloride **3c** (R<sup>2</sup>= F, R<sup>3</sup>=H); yellow solid; m.p.: 260.9 °C; IR (cm<sup>-1</sup>): 3321 (NH), 1635 (CO), 1614 (CO); <sup>1</sup>H NMR (DMSO-*d*<sub>6</sub>, 200 MHz) δ: 3.89 (s, 3H), 7.16 (td, 1H, *J* = 9.2, 9.2, 2.3 Hz), 7.25–7.44 (m, 2H), 7.49–7.68 (m, 2H), 7.96 (dd, 1H, *J* = 9.7, 2.3 Hz), 8.29–8.32 (m, 3H), 12.37 (s, 1H); <sup>13</sup>C{<sup>1</sup>H} NMR (DMSO-*d*<sub>6</sub>, 50 MHz) δ: 33.7, 106.7 (d, *J* = 24.1 Hz), 111.5, 111.8 (d, *J* = 4.3 Hz), 112.0 (d, *J* = 26.0 Hz), 114.4 (d, *J* = 9.2 Hz), 121.9, 123.3, 124.0, 126.6, 126.8

(d,  $J$  = 11.5 Hz), 130.2, 133.8, 137.9, 139.2, 141.4, 159.4 (d,  $J$  = 235.3 Hz), 188.3, 188.9. *Anal.* Calculated for  $C_{19}H_{13}FN_2O_3$  (MW: 320.32): C, 71.24; H, 4.09; N, 8.75%. Found: C, 69.96; H, 4.27; N, 8.87%.

**1-(5-Fluoro-1H-indol-3-yl)-2-(5-fluoro-1-methyl-1H-indol-3-yl)ethane-1,2-dione (4w).** Yield: 68% from indole **2c** ( $R=F$ ) and acyl chloride **3c** ( $R^2=F$ ,  $R^3=H$ ); yellow solid; m.p.: 303.2 °C; IR ( $cm^{-1}$ ): 3352 (NH), 1627 (CO), 1616 (CO);  $^1H$  NMR (DMSO- $d_6$ , 200 MHz)  $\delta$ : 3.90 (s, 3H), 7.13-7.26 (m, 2H), 7.57 (dd, 1H,  $J$  = 8.8, 4.4 Hz), 7.65 (dd, 1H,  $J$  = 8.9, 4.4 Hz), 7.93-7.99 (m, 2H), 8.34 (dd, 1H,  $J$  = 3.3 Hz), 8.40 (s, 1H), 12.39 (s, 1H);  $^{13}C\{^1H\}$  NMR (DMSO- $d_6$ , 50 MHz)  $\delta$ : 34.0, 106.7 (d,  $J$  = 24.8 Hz), 106.9 (d,  $J$  = 24.4 Hz), 111.6 (d,  $J$  = 4.4 Hz), 111.9 (d,  $J$  = 26.2 Hz), 112.2 (d,  $J$  = 25.8 Hz), 112.9 (d,  $J$  = 4.3 Hz), 113.0 (d,  $J$  = 9.9 Hz), 114.4 (d,  $J$  = 9.8 Hz), 126.8 (d,  $J$  = 11.1 Hz), 127.3 (d,  $J$  = 11.1 Hz), 133.8, 134.6, 139.3, 142.5, 158.1 (d,  $J$  = 235.5 Hz), 161.2 (d,  $J$  = 236.22 Hz), 188.0, 188.4. *Anal.* Calculated for  $C_{19}H_{12}F_2N_2O_2$  (MW: 338.31): C, 67.45; H, 3.58; N, 8.28%. Found: C, 67.71; H, 3.27; N, 8.44%.

**1-(5-Methoxy-1-methyl-1H-indol-3-yl)-2-(1-methyl-1H-indol-3-yl)ethane-1,2-dione (4x).** Yield: 81% from indole **2d** ( $R=OCH_3$ ) and acyl chloride **3e** ( $R^2=H$ ,  $R^3=CH_3$ ); orange solid; m.p.: 196.3 °C; IR ( $cm^{-1}$ ): 1613 (CO), 1520 (CO);  $^1H$  NMR (DMSO- $d_6$ , 200 MHz)  $\delta$ : 3.84 (s, 6H), 3.85 (s, 3H), 3.89 (s, 3H), 6.99 (dd, 1H,  $J$  = 8.9, 2.5 Hz), 7.33-7.41 (m, 2H), 7.52 (d, 1H,  $J$  = 8.9 Hz), 7.59-7.63 (m, 1H), 7.82 (d, 1H,  $J$  = 2.5 Hz), 8.23 (s, 1H), 8.28-8.32 (m, 2H);  $^{13}C\{^1H\}$  NMR (DMSO- $d_6$ , 50 MHz)  $\delta$ : 33.2, 33.4, 55.3, 103.2, 110.9, 111.0, 111.2, 111.9, 113.1, 121.4, 122.8, 123.5, 126.0, 127.0, 132.3, 137.4, 140.7, 140.8, 156.2, 188.0, 188.2; *Anal.* Calculated for  $C_{21}H_{18}N_2O_3$  (MW: 346.38) C, 72.82; H, 5.24; N, 8.09%. Found: C, 72.96; H, 5.04; N, 7.98%.

**1-(5-Fluoro-1-methyl-1H-indol-3-yl)-2-(5-methoxy-1-methyl-1H-indol-3-yl)ethane-1,2-dione (4y).** Yield: 84% from indole **2c** ( $R=F$ ) and acyl chloride **3h** ( $R^2=OCH_3$ ,  $R^3=CH_3$ ); orange solid; m.p.: 202.4 °C; IR ( $cm^{-1}$ ): 1622 (CO), 1516 (CO);  $^1H$  NMR (DMSO- $d_6$ , 200 MHz)  $\delta$ : 3.83 (s, 3H), 3.85 (s, 3H), 3.89 (s, 3H), 6.98 (dd, 1H,  $J$  = 8.9, 2.5 Hz), 7.22 (td, 1H,  $J$  = 9.6, 9.2, 2.6 Hz), 7.50 (d, 1H,  $J$  = 8.9 Hz), 7.64 (dd, 1H,  $J$  = 9.0, 4.4 Hz), 7.81 (d, 1H,  $J$  = 2.5 Hz), 7.96 (dd, 1H,  $J$  = 9.6, 2.6 Hz), 8.24 (s, 1H), 8.39 (s, 1H);  $^{13}C\{^1H\}$  NMR (DMSO- $d_6$ , 50 MHz)  $\delta$ : 33.9, 34.0, 55.8, 103.7, 106.9 (d,  $J$  = 24.8 Hz), 111.4, 111.7 (d,  $J$  = 4.1 Hz), 112.0 (d,  $J$  = 25.6 Hz), 112.4, 113.1 (d,  $J$  = 9.6 Hz), 113.6, 127.3 (d,  $J$  = 11.0 Hz), 127.5, 132.8, 134.6, 141.3, 142.5, 156.8, 159.8 (d,  $J$  = 235.3 Hz), 188.0, 188.4; *Anal.* Calculated for  $C_{21}H_{17}FN_2O_3$  (MW: 364.37) C, 69.22; H, 4.70; N, 7.69%. Found: C, 69.50; H, 4.54; N, 7.84%.

**1-(5-Bromo-1-methyl-1H-indol-3-yl)-2-(5-methoxy-1-methyl-1H-indol-3-yl)ethane-1,2-dione (4z).** Yield: 85% from indole **2b** ( $R=Br$ ) and acyl chloride **3h** ( $R^2=OCH_3$ ,  $R^3=CH_3$ ); orange solid; m.p.: 203.1 °C; IR ( $cm^{-1}$ ): 1647 (CO), 1624 (CO);  $^1H$  NMR (DMSO- $d_6$ , 200 MHz)  $\delta$ : 3.83 (s, 3H), 3.85 (s, 3H), 3.88 (s, 3H), 6.98 (dd, 1H,  $J$  = 8.9, 2.5 Hz), 7.49-7.52 (m, 2H), 7.61 (d, 1H,  $J$  = 9.1 Hz), 7.80 (d, 1H,  $J$  = 2.5 Hz), 8.25 (s, 1H), 8.38 (s, 1H), 8.43 (d, 1H,  $J$  = 1.9 Hz);  $^{13}C\{^1H\}$  NMR (DMSO- $d_6$ , 50 MHz)  $\delta$ : 33.9 (x 2), 55.9, 103.8, 111.2, 111.3, 112.5, 113.6, 113.8, 116.2, 124.0, 126.5, 127.5, 128.3, 132.9, 136.7, 141.4, 142.2, 156.8, 187.8, 188.4; *Anal.* Calculated for  $C_{21}H_{17}BrN_2O_3$  (MW: 425.28) C, 59.31; H, 4.03; N, 6.59%. Found: C, 59.50; H, 4.19; N, 6.78%.

**1-(5-Fluoro-1-methyl-1H-indol-3-yl)-2-(1-methyl-1H-indol-3-yl)ethane-1,2-dione (4aa).** Yield: 81% from indole **2c** ( $R=F$ ) and acyl chloride **3e** ( $R^2=H$ ,  $R^3=CH_3$ ); yellow solid; m.p.: 273.5 °C; IR ( $cm^{-1}$ ): 1616 (CO), 1607 (CO);  $^1H$  NMR (DMSO- $d_6$ , 200 MHz)  $\delta$ : 3.95 (s, 6H), 7.24-7.46 (m, 3H), 7.65-7.75 (m, 2H), 8.02 (dd, 1H,  $J$  = 9.7, 2.6 Hz), 8.33-8.44 (m, 3H);  $^{13}C\{^1H\}$  NMR (DMSO- $d_6$ , 50 MHz)  $\delta$ : 33.7, 34.0, 106.9 (d,  $J$  = 24.8 Hz), 111.6, 111.7, 111.8 (d,  $J$  = 4.1 Hz), 112.0 (d,  $J$  = 26.0 Hz), 113.1 (d,  $J$  = 9.6 Hz), 121.9, 123.3, 124.0, 126.6, 127.3 (d,  $J$  = 11.0 Hz), 134.6, 138.0, 141.4, 142.4, 159.8 (d,  $J$  = 236.03 Hz), 188.2, 188.4; *Anal.* Calculated for  $C_{20}H_{15}FN_2O_2$  (MW: 334.34) C, 71.85; H, 4.52; N, 8.38%. Found: C, 71.64; H, 4.67; N, 8.14%.

**1-(5-Bromo-1-methyl-1H-indol-3-yl)-2-(1-methyl-1H-indol-3-yl)ethane-1,2-dione (4ab).** Yield: 69% from indole **2a** ( $R=H$ ) and acyl chloride **3f** ( $R^2=Br$ ,  $R^3=CH_3$ ); yellow solid; m.p.: 274.5 °C; IR ( $cm^{-1}$ ): 1628 (CO), 1610 (CO);  $^1H$  NMR (DMSO- $d_6$ , 200 MHz)  $\delta$ : 3.89 (s, 6H), 7.31-7.41 (m, 2H), 7.51 (dd, 1H,  $J$  = 8.7, 1.9 Hz), 7.60-7.65 (m, 2H), 8.28-8.34 (m, 2H), 8.38 (s, 1H), 8.45 (d, 1H,  $J$  = 1.9 Hz);  $^{13}C\{^1H\}$  NMR (DMSO- $d_6$ , 50 MHz)  $\delta$ : 33.3, 33.5, 99.7, 110.6, 111.0, 111.1, 113.3, 115.7, 121.4, 122.9, 123.3, 123.6, 126.0, 126.0, 127.7, 136.2, 137.4, 141.1, 187.5, 187.9; *Anal.* Calculated for  $C_{20}H_{15}BrN_2O_2$  (MW: 395.25): C, 60.78; H, 3.83; N, 7.09%. Found: C, 60.89; H, 3.69; N, 7.23%.

**5,6-Di(1H-indol-3-yl)-1,2,4-triazin-3-amine (5a).** Yield: 55%; yellow solid; m.p.: 288.2 °C; IR (cm<sup>-1</sup>): 3453/3400 (NH<sub>2</sub>), 3285 (NH), 3184 (NH); <sup>1</sup>H NMR (DMSO-*d*<sub>6</sub>, 200 MHz) δ: 6.86-6.95 (m, 4H), 7.08-7.22 (m, 4H), 7.39-7.34 (m, 1H), 7.51-7.47 (m, 1H), 7.60 (d, 1H, *J* = 2.5 Hz), 8.65 (m, 1H), 11.41-11.47 (m, 2H); <sup>13</sup>C{<sup>1</sup>H} NMR (DMSO-*d*<sub>6</sub>, 50 MHz) δ: 110.4, 111.8, 111.9, 112.8, 119.3, 119.6, 120.7, 121.4, 122.4, 123.1, 125.2, 125.7, 126.4, 130.6, 136.1, 136.1, 143.1, 153.7, 160.8. LC-MS: *m/z* [M + H]<sup>+</sup> calcd for C<sub>19</sub>H<sub>15</sub>N<sub>6</sub><sup>+</sup> 327.13; found, 327.35. *Anal.* Calculated for C<sub>19</sub>H<sub>14</sub>N<sub>6</sub> (MW: 326.35) C, 69.92; H, 4.32; N, 25.75%. Found: C, 69.72; H, 4.43; N, 25.60%.

**5,6-Bis(5-methoxy-1H-indol-3-yl)-1,2,4-triazin-3-amine (5b).** Yield: 78%; yellow solid; m.p.: 197.2 °C; IR (cm<sup>-1</sup>): 3383/3298 (NH<sub>2</sub>), 3219 (NH), 3145 (NH); <sup>1</sup>H NMR (DMSO-*d*<sub>6</sub>, 200 MHz) δ: 3.46 (s, 3H), 3.73 (s, 3H), 6.60 (d, 1H, *J*=2.2 Hz), 6.74 (dd, 1H, *J*=8.6, 2.4 Hz), 6.81 (d, 1H, *J*=2.6 Hz), 6.90 (s, 2H), 6.97 (m, 1H), 7.25 (d, 1H, *J*=8.8 Hz), 7.35 (d, 1H, *J*=8.8 Hz), 7.50 (d, 1H, *J*=2.6 Hz), 7.91 (d, 1H, *J*=2.3 Hz), 11.27 (d, 1H, *J*=1.7 Hz), 11.31 (d, 1H, *J*=1.5 Hz). <sup>13</sup>C{<sup>1</sup>H} NMR (DMSO-*d*<sub>6</sub>, 50 MHz) δ: 55.5, 55.8, 101.6, 105.2, 110.9, 112.2, 112.7, 112.9 (x 2), 113.0, 126.3, 126.6, 127.4, 131.5, 131.6, 131.7, 143.9, 154.0, 154.4, 155.1, 160.8. LC-MS: *m/z* [M + H]<sup>+</sup> calcd for C<sub>21</sub>H<sub>19</sub>N<sub>6</sub>O<sub>2</sub><sup>+</sup> 387.15; found, 387.39. *Anal.* Calculated for C<sub>21</sub>H<sub>18</sub>N<sub>6</sub>O<sub>2</sub> (MW: 386.41) C, 65.27; H, 4.70; N, 21.75%. Found: C, 65.46; H, 4.59; N, 21.54%.

**5,6-Bis(5-fluoro-1H-indol-3-yl)-1,2,4-triazin-3-amine (5c).** Yield: 61%; yellow solid; m.p.: 178.1 °C; IR (cm<sup>-1</sup>): 3420/3414 (NH<sub>2</sub>), 3169 (2 x NH b.s.); <sup>1</sup>H NMR (DMSO-*d*<sub>6</sub>, 200 MHz) δ: 6.86 (dd, 1H, *J* = 9.9, 2.4 Hz), 7.04-7.09 (m, 5H), 7.40 (dd, 1H, *J* = 4.7 Hz), 7.19 (dd, 1H, *J* = 8.8, 4.6 Hz), 7.70 (d, 1H, *J* = 2.4 Hz), 8.37 (dd, 1H, *J* = 10.7, 2.6 Hz), 11.53 (s, 1H), 11.60 (s, 1H); <sup>13</sup>C{<sup>1</sup>H} NMR (DMSO-*d*<sub>6</sub>, 50 MHz) δ: 104.6 (d, *J* = 24.4 Hz), 108.3, 108.4 (d, *J* = 26.7 Hz), 110.2 (d, *J* = 26.2 Hz), 110.9 (d, *J* = 4.6 Hz), 111.1 (d, *J* = 22.2 Hz), 113.3 (d, *J* = 4.6 Hz), 113.4 (d, *J* = 9.8 Hz), 113.5 (d, *J* = 9.3 Hz), 126.5 (d, *J* = 10.2 Hz), 127.4 (d, *J* = 11.3 Hz), 127.8, 133.2, 133.3, 143.1, 153.6, 157.5 (d, *J* = 232.4 Hz), 158.5 (d, *J* = 232.8 Hz), 161.4. LC-MS: *m/z* [M + H]<sup>+</sup> calcd for C<sub>19</sub>H<sub>13</sub>F<sub>2</sub>N<sub>6</sub><sup>+</sup> 363.11; found, 363.35. *Anal.* Calculated for C<sub>19</sub>H<sub>12</sub>F<sub>2</sub>N<sub>6</sub> (MW: 362.34) C, 62.98; H, 3.34; N, 23.19%. Found: C, 63.28; H, 3.23; N, 23.05%.

**5,6-Bis(5-bromo-1H-indol-3-yl)-1,2,4-triazin-3-amine (5d).** Yield: 70%; yellow solid; m.p.: 208.2 °C; IR (cm<sup>-1</sup>): 3447/3420 (NH<sub>2</sub>), 3318 (NH), 3275 (NH); <sup>1</sup>H NMR (200 MHz, DMSO-*d*<sub>6</sub>) δ: 7.02 (d, 1H, *J* = 1.8 Hz), 7.07 (s, 2H), 7.22-7.32 (m, 2H), 7.36-7.38 (m, 2H), 7.47 (d, 1H, *J* = 8.6 Hz), 7.62 (d, 1H, *J* = 1.6 Hz), 8.65 (s, 1H), 11.61 (s, 1H), 11.65 (s, 1H). <sup>13</sup>C{<sup>1</sup>H} NMR (DMSO-*d*<sub>6</sub>, 50 MHz) δ: 105.3, 110.6, 112.5, 112.6, 114.2, 114.4, 122.2, 124.5, 125.2, 125.5, 127.4, 128.0, 128.4, 131.8, 135.3, 135.4, 143.1, 153.4, 161.4. LC-MS: *m/z* [M + H]<sup>+</sup> calcd for C<sub>19</sub>H<sub>12</sub>Br<sub>2</sub>N<sub>6</sub><sup>+</sup> 482.95; found, 483.21. *Anal.* Calculated for C<sub>19</sub>H<sub>12</sub>Br<sub>2</sub>N<sub>6</sub> (MW: 484.15) C, 47.14; H, 2.50; N, 17.36%. Found: C, 47.28; H, 2.70; N, 17.10%.

**5,6-Bis(1-methyl-1H-indol-3-yl)-1,2,4-triazin-3-amine (5e).** Yield: 85%; yellow solid; m.p.: 274.4 °C; IR (cm<sup>-1</sup>): 3458/3265 (NH<sub>2</sub>); <sup>1</sup>H NMR (DMSO-*d*<sub>6</sub>, 200 MHz) δ: 3.51 (s, 3H), 3.88 (s, 3H), 6.90-6.97 (m, 3H), 7.07 (s, 1H), 7.15-7.29 (m, 4H), 7.42-7.56 (m, 2H), 7.62 (s, 1H), 8.56-8.60 (m, 1H); <sup>13</sup>C{<sup>1</sup>H} NMR (DMSO-*d*<sub>6</sub>, 50 MHz) δ: 32.6, 32.9, 109.5, 110.1, 110.2, 111.6, 119.3, 120.0, 120.9, 121.4, 122.4, 123.1, 125.9, 126.8, 129.5, 134.1, 136.6, 136.8, 143.0, 152.8, 160.8. LC-MS: *m/z* [M + H]<sup>+</sup> calcd for C<sub>21</sub>H<sub>19</sub>N<sub>6</sub><sup>+</sup> 355.16; found, 355.36. *Anal.* Calculated for C<sub>21</sub>H<sub>18</sub>N<sub>6</sub> (MW: 354.41) C, 71.71; H, 5.12; N, 23.71%. Found: C, 71.47; H, 5.23; N, 23.58%.

**5,6-Bis(5-methoxy-1-methyl-1H-indol-3-yl)-1,2,4-triazin-3-amine (5f).** Yield: 98%; yellow solid; m.p.: 199.5 °C; IR (cm<sup>-1</sup>): 3458/3273 (NH<sub>2</sub>); <sup>1</sup>H NMR (DMSO-*d*<sub>6</sub>, 200 MHz) δ: 3.43 (s, 3H), 3.55 (s, 3H), 3.72 (s, 3H), 3.82 (s, 3H), 6.71 (d, 1H, *J* = 2.2 Hz), 6.79-6.90 (m, 2H), 7.23-7.26 (m, 3H), 7.37 (d, 1H, *J* = 8.9 Hz), 7.43 (d, 1H, *J* = 8.9 Hz), 7.57 (s, 1H), 7.86 (d, 1H, *J* = 2.4 Hz). <sup>13</sup>C{<sup>1</sup>H} NMR (DMSO-*d*<sub>6</sub>, 50 MHz) δ: 32.8, 33.2, 55.0, 55.3, 100.1, 101.6, 104.8, 109.4, 110.5, 110.0, 111.1, 111.2, 111.7, 111.8, 112.3, 126.3, 127.3, 131.9, 132.0, 143.1, 153.7, 154.1, 155.1. *Anal.* Calculated for C<sub>23</sub>H<sub>22</sub>N<sub>6</sub>O<sub>2</sub> (MW: 414.46) C, 66.65; H, 5.35; N, 20.28%. Found: C, 66.76; H, 5.17; N, 20.11%.

**5,6-Bis(5-fluoro-1-methyl-1H-indol-3-yl)-1,2,4-triazin-3-amine (5g).** Yield: 77%; yellow solid; m.p.: 236.5 °C; IR (cm<sup>-1</sup>): 3485/3275 (NH<sub>2</sub>); <sup>1</sup>H NMR (DMSO-*d*<sub>6</sub>, 200 MHz) δ: 3.56 (s, 3H), 3.88 (s, 3H), 6.93 (dd, 1H, *J* = 10.0, 2.5 Hz), 6.99-7.12 (m, 4H), 7.16 (s, 1H), 7.50 (dd, 1H, *J* = 8.9, 4.6 Hz), 7.57 (dd, 1H, *J* = 8.9, 4.6 Hz), 7.70 (s, 1H), 8.37 (dd, 1H, *J* = 10.7, 2.5 Hz); <sup>13</sup>C{<sup>1</sup>H} NMR (DMSO-*d*<sub>6</sub>, 50 MHz) δ: 33.4, 33.7, 105.0 (d, *J* = 24.2 Hz), 108.6 (d, *J* = 25.6 Hz), 109.6 (d, *J* = 4.5 Hz), 109.9, 110.2 (d, *J* = 25.6 Hz), 111.1 (d, *J* = 26.3 Hz), 111.9 (d, *J* = 4.1 Hz), 112.0, 112.2 (d, *J* = 8.7 Hz), 126.7 (d, *J* = 10.1 Hz), 127.8 (d, *J* = 11.9 Hz), 131.9, 134.0 (d, *J* = 12.8 Hz), 135.9, 142.9, 152.8, 157.5 (d, *J* = 233.0 Hz), 158.8 (d, *J* = 236.8 Hz), 161.2. LC-MS: *m/z* [M + H]<sup>+</sup> calcd for C<sub>21</sub>H<sub>17</sub>F<sub>2</sub>N<sub>6</sub><sup>+</sup> 391.14; found, 391.42. *Anal.* Calculated for C<sub>21</sub>H<sub>16</sub>F<sub>2</sub>N<sub>6</sub> (MW: 390.39) C, 64.61; H, 4.13; N, 21.53%. Found: C, 64.83; H, 3.98; N, 21.40%.

5-(5-Methoxy-1-methyl-1H-indol-3-yl)-6-(1-methyl-1H-indol-3-yl)-1,2,4-triazin-3-amine (**5h**). Yield: 41% (overall yield: 98%); yellow solid; m.p.: 272.5 °C; IR (cm<sup>-1</sup>): 3374/3335 (NH<sub>2</sub>); <sup>1</sup>H NMR (DMSO-*d*<sub>6</sub>, 200 MHz) δ: 3.51 (s, 3H), 3.70 (s, 3H), 3.85 (s, 3H), 6.83-6.98 (m, 4H), 7.10 (s, 1H), 7.16-7.34 (m, 3H), 7.51-7.56 (m, 2H), 7.86 (s, 1H); <sup>13</sup>C{<sup>1</sup>H} NMR (DMSO-*d*<sub>6</sub>, 50 MHz) δ: 33.1, 33.5, 55.7, 105.3, 109.8, 110.6, 111.4, 112.2, 112.7, 119.9, 120.5, 121.9, 126.5, 127.7, 130.0, 132.4, 134.9, 137.1, 143.5, 153.3, 155.3, 161.2. LC-MS: *m/z* [M + H]<sup>+</sup> calcd for C<sub>22</sub>H<sub>20</sub>N<sub>6</sub>O<sup>+</sup> 385.17; found, 385.45. *Anal.* Calculated for C<sub>22</sub>H<sub>20</sub>N<sub>6</sub>O (MW: 384.43) C, 68.73; H, 5.24; N, 21.86%. Found: 68.53; H, 5.37; N, 21.53%.

6-(5-Methoxy-1-methyl-1H-indol-3-yl)-5-(1-methyl-1H-indol-3-yl)-1,2,4-triazin-3-amine (**6h**). Yield: 57% (overall yield: 98%); yellow solid; m.p.: 250.2 °C; IR (cm<sup>-1</sup>): 3428/3304 (NH<sub>2</sub>); <sup>1</sup>H NMR (DMSO-*d*<sub>6</sub>, 200 MHz) δ: 3.41 (s, 3H), 3.54 (s, 3H), 3.83 (s, 3H), 6.58 (m, 1H), 6.79-6.90 (m, 3H), 7.11 (s, 1H), 7.14-7.27 (m, 2H), 7.40-7.47 (m, 2H), 7.56 (s, 1H), 8.47-8.50 (m, 1H); <sup>13</sup>C{<sup>1</sup>H} NMR (DMSO-*d*<sub>6</sub>, 50 MHz) δ: 32.8, 33.0, 55.0, 101.6, 109.8, 110.3, 111.0, 111.2, 111.7, 120.9, 122.4, 122.8, 126.3, 126.8, 130.0, 132.0, 134.1, 136.9, 143.5, 152.7, 153.7, 160.8. LC-MS: *m/z* [M + H]<sup>+</sup> calcd for C<sub>22</sub>H<sub>20</sub>N<sub>6</sub>O<sup>+</sup> 385.17; found, 385.45. *Anal.* Calculated for C<sub>22</sub>H<sub>20</sub>N<sub>6</sub>O (MW: 384.43) C, 68.73; H, 5.24; N, 21.86%. Found: C, 68.57; H, 5.42; N, 21.58%.

5-(5-Fluoro-1-methyl-1H-indol-3-yl)-6-(1-methyl-1H-indol-3-yl)-1,2,4-triazin-3-amine (**5i**). Yield: 34% (overall yield: 73%); yellow solid; m.p.: 279.4 °C; IR (cm<sup>-1</sup>): 3462/3266 (NH<sub>2</sub>); <sup>1</sup>H NMR (DMSO-*d*<sub>6</sub>, 200 MHz) δ: 3.57 (s, 3H), 3.86 (s, 3H), 6.93 (s, 2H), 6.99 (dd, 1H, *J* = 10.5, 2.1 Hz), 7.05 (dd, 1H, *J* = 9.6, 2.0 Hz), 7.15-7.28 (m, 3H), 7.44-7.47 (m, 1H), 7.55 (dd, 1H, *J* = 8.9, 4.5 Hz), 7.66 (s, 1H), 8.48-8.50 (m, 1H); <sup>13</sup>C{<sup>1</sup>H} NMR (DMSO-*d*<sub>6</sub>, 50 MHz) δ: 33.3, 33.4, 105.1 (d, *J* = 23.7), 110.1 (d, *J* = 25.6), 110.8, 111.9 (d, *J* = 9.9 Hz), 112.0, 112.1 (d, *J* = 4.9 Hz), 121.4, 122.9, 123.4, 126.7 (d, *J* = 10.8 Hz), 127.2, 131.9, 133.9, 134.4, 137.3, 143.2, 153.1, 157.7 (d, *J* = 232.4 Hz), 161.3. LC-MS: *m/z* [M + H]<sup>+</sup> calcd for C<sub>21</sub>H<sub>18</sub>FN<sub>6</sub>O<sup>+</sup> 373.15; found, 373.39. *Anal.* Calculated for C<sub>21</sub>H<sub>17</sub>FN<sub>6</sub> (MW: 372.40) C, 67.73; H, 4.60; N, 22.57%. Found: C, 67.50; H, 4.72; N, 22.39%.

6-(5-Fluoro-1-methyl-1H-indol-3-yl)-5-(1-methyl-1H-indol-3-yl)-1,2,4-triazin-3-amine (**6i**). Yield: 39% (overall yield: 73%); yellow solid; m.p.: 254.4 °C; IR (cm<sup>-1</sup>): 3387/3366 (NH<sub>2</sub>); <sup>1</sup>H NMR (DMSO-*d*<sub>6</sub>, 200 MHz) δ: 3.50 (s, 3H), 3.89 (s, 3H), 6.92-6.99 (m, 3H), 7.07 (s, 1H), 7.12 (dd, 1H, *J* = 9.2, 2.4 Hz), 7.16-7.22 (m, 2H), 7.46 (dd, 1H, *J* = 8.9, 4.6 Hz), 7.53-7.56 (m, 1H), 7.63 (s, 1H), 8.38 (dd, 1H, *J* = 10.7, 2.4 Hz); <sup>13</sup>C{<sup>1</sup>H} NMR (DMSO-*d*<sub>6</sub>, 50 MHz) δ: 32.7, 33.3, 108.2 (d, *J* = 24.5 Hz), 109.5 (d, *J* = 4.6 Hz), 110.3, 110.6 (d, *J* = 26.4 Hz), 111.5, 111.6, 111.7 (d, *J* = 9.7 Hz), 119.5, 119.9, 121.6, 126.0, 127.4 (d, *J* = 11.3 Hz), 129.6, 135.7, 136.7, 142.8, 152.5, 159.9 (d, *J* = 232.9 Hz), 160.8. LC-MS: *m/z* [M + H]<sup>+</sup> calcd for C<sub>21</sub>H<sub>18</sub>FN<sub>6</sub>O<sup>+</sup> 373.15; found, 373.40. *Anal.* Calculated for C<sub>21</sub>H<sub>17</sub>FN<sub>6</sub> (MW: 372.40) C, 67.73; H, 4.60; N, 22.57%. Found: C, 67.53; H, 4.79; N, 22.68%.

5-(5-Bromo-1-methyl-1H-indol-3-yl)-6-(1-methyl-1H-indol-3-yl)-1,2,4-triazin-3-amine (**5j**). Yield: 62% (overall yield: 97%); yellow solid; m.p.: 257.3 °C; IR (cm<sup>-1</sup>): 3428/3336 (NH<sub>2</sub>); <sup>1</sup>H NMR (DMSO-*d*<sub>6</sub>, 200 MHz) δ: 3.50 (s, 3H), 3.88 (s, 3H), 6.90-6.95 (m, 1H), 7.02 (s, 2H), 7.10 (s, 1H), 7.13-7.20 (m, 2H), 7.37 (dd, 1H, *J* = 8.7, 1.7 Hz), 7.43 (d, 1H, *J* = 8.7 Hz), 7.54 (m, 1H), 7.62 (s, 1H), 8.65 (m, 1H); <sup>13</sup>C{<sup>1</sup>H} NMR (DMSO-*d*<sub>6</sub>, 50 MHz) δ: 33.1, 33.6, 109.7, 110.6, 111.9, 112.9, 114.6, 119.9, 120.4, 122.0, 125.4, 125.5, 126.3, 128.8, 130.0, 135.7, 136.1, 137.2, 143.5, 152.7, 161.3. LC-MS: *m/z* [M + H]<sup>+</sup> calcd for C<sub>21</sub>H<sub>18</sub>BrN<sub>6</sub><sup>+</sup> 433.07; found, 433.30. *Anal.* Calculated for C<sub>21</sub>H<sub>17</sub>BrN<sub>6</sub> (MW: 433.30) C, 58.21; H, 3.95; N, 19.40%. Found: C, 58.45; H, 3.72; N, 19.33%.

6-(5-Bromo-1-methyl-1H-indol-3-yl)-5-(1-methyl-1H-indol-3-yl)-1,2,4-triazin-3-amine (**6j**). Yield: 35% (overall yield: 97%); yellow solid; m.p.: 266.0 °C; IR (cm<sup>-1</sup>): 3405/328 (NH<sub>2</sub>); <sup>1</sup>H NMR (DMSO-*d*<sub>6</sub>, 200 MHz) δ: 3.60 (s, 3H), 3.84 (s, 3H), 6.95 (s, 2H), 7.13-7.18 (m, 1H), 7.21-7.27 (m, 2H), 7.31 (dd, 1H, *J* = 8.7, 1.8 Hz), 7.45-7.50 (m, 2H), 7.54 (d, 1H, *J* = 8.7 Hz), 7.60 (s, 1H), 8.42-8.44 (m, 1H); <sup>13</sup>C{<sup>1</sup>H} NMR (DMSO-*d*<sub>6</sub>, 50 MHz) δ: 33.3, 33.4, 110.1, 110.8, 111.5, 112.7, 112.8, 121.4, 122.7, 122.9, 123.3, 124.4, 127.1, 128.3, 131.5, 134.4, 135.9, 137.4, 143.1, 153.2, 161.2. LC-MS: *m/z* [M + H]<sup>+</sup> calcd for C<sub>21</sub>H<sub>18</sub>BrN<sub>6</sub><sup>+</sup> 433.07; found, 433.34. *Anal.* Calculated for C<sub>21</sub>H<sub>17</sub>BrN<sub>6</sub> (MW: 433.30) C, 58.21; H, 3.95; N, 19.40%. Found: C, 58.55; H, 3.74; N, 19.54%.

6-(5-Fluoro-1-methyl-1H-indol-3-yl)-5-(5-methoxy-1-methyl-1H-indol-3-yl)-1,2,4-triazin-3-amine (**5k**). Yield: 49% (overall yield: 96%); yellow solid; m.p.: 239.5 °C; IR (cm<sup>-1</sup>): 3483/3292 (NH<sub>2</sub>); <sup>1</sup>H NMR (DMSO-*d*<sub>6</sub>, 200 MHz) δ: 3.44 (s, 3H), 3.53 (s, 3H), 3.85 (s, 3H), 6.58 (d, 1H, *J* = 2.1 Hz), 6.81 (dd, 1H, *J* = 8.8, 2.1 Hz), 6.97 (s, 2H), 7.10 (dd, 1H, *J* = 9.3, 2.5 Hz), 7.12 (s, 1H), 7.42-7.49 (m, 2H), 7.59 (s, 1H), 8.30 (dd, 1H, *J* = 10.6, 2.4 Hz); <sup>13</sup>C{<sup>1</sup>H} NMR (DMSO-

*d*<sub>6</sub>, 50 MHz)  $\delta$ : 33.3, 33.7, 55.5, 102.0, 108.4 (d, *J*=25.0 Hz), 110.1 (d, *J*=4.8 Hz), 111.0 (d, *J*=26.1 Hz), 111.4, 111.5, 112.0 (d, *J*=10.1 Hz), 112.2, 126.7, 127.8 (d, *J*=11.1 Hz), 130.4, 132.4, 134.0, 136.0, 143.5, 152.8, 154.1, 158.7 (d, *J*=233.2 Hz), 161.2. LC-MS: *m/z* [M + H]<sup>+</sup> calcd for C<sub>22</sub>H<sub>20</sub>FN<sub>6</sub>O<sup>+</sup> 403.16; found, 403.49. *Anal.* Calculated for C<sub>22</sub>H<sub>19</sub>FN<sub>6</sub>O (MW: 402.42) C, 65.66; H, 4.76; N, 20.88%. Found: C, 65.71; H, 4.49; N, 20.69%.

5-(5-Fluoro-1-methyl-1*H*-indol-3-yl)-6-(5-methoxy-1-methyl-1*H*-indol-3-yl)-1,2,4-triazin-3-amine (**6k**). Yield: 47% (overall yield: 96%); yellow solid; m.p.: 251.2 °C; IR (cm<sup>-1</sup>): 3460/3285 (NH<sub>2</sub>); <sup>1</sup>H NMR (DMSO-*d*<sub>6</sub>, 200 MHz)  $\delta$ : 3.56 (s, 3H), 3.69 (s, 3H), 3.84 (s, 3H), 6.85 (dd, 1H, *J*=2.5 Hz, 8.9 Hz), 6.93 (m, 2H), 6.99 (dd, 1H, *J*=10.0, 2.4 Hz), 7.05 (dd, 1H, *J*=9.3, 2.5 Hz), 7.17 (s, 1H), 7.35 (d, 1H, *J*=8.9 Hz), 7.54 (dd, 1H, *J*=8.8, 4.4 Hz), 7.62 (s, 1H), 7.79 (d, 1H, *J*=1.6 Hz); <sup>13</sup>C{<sup>1</sup>H} NMR (DMSO-*d*<sub>6</sub>, 50 MHz)  $\delta$ : 33.4, 33.6, 55.7, 105.4 (d, *J*=25.8 Hz), 109.8, 109.9, 110.6 (d, *J*=26.3 Hz), 111.5, 111.8 (d, *J*=10.5), 112.2 (d, *J*=4.6 Hz), 112.7, 126.8 (d, *J*=10.2 Hz), 127.6, 131.8, 132.5, 133.9, 134.7, 143.2, 153.2, 155.3, 157.7 (d, *J*=232.4 Hz), 161.2. LC-MS: *m/z* [M + H]<sup>+</sup> calcd for C<sub>22</sub>H<sub>20</sub>FN<sub>6</sub>O<sup>+</sup> 403.16; found, 403.45. *Anal.* Calculated for C<sub>22</sub>H<sub>19</sub>FN<sub>6</sub>O (MW: 402.42) C, 65.66; H, 4.76; N, 20.88%. Found: C, 65.82; H, 4.47; N, 20.64%.

6-(5-Bromo-1-methyl-1*H*-indol-3-yl)-5-(5-methoxy-1-methyl-1*H*-indol-3-yl)-1,2,4-triazin-3-amine (**5l**). Yield: 65% (overall yield: 94%); yellow solid; m.p.: 233.9 °C; IR (cm<sup>-1</sup>): 3404/3282 (NH<sub>2</sub>); <sup>1</sup>H NMR (DMSO-*d*<sub>6</sub>, 200 MHz)  $\delta$ : 3.41 (s, 3H), 3.54 (s, 3H), 3.84 (s, 3H), 6.54 (d, 1H, *J*=2.1 Hz), 6.79 (dd, 1H, *J*=8.8, 2.1 Hz), 7.0 (s, 2H), 7.15 (s, 1H), 7.34-7.46 (m, 3H), 7.58 (s, 1H), 8.56 (m, 1H); <sup>13</sup>C{<sup>1</sup>H} NMR (DMSO-*d*<sub>6</sub>, 50 MHz)  $\delta$ : 33.3, 33.6, 55.4, 101.9, 109.9, 111.3, 111.4, 112.2, 112.8, 114.5, 125.1, 125.4, 126.6, 128.7, 130.4, 132.4, 135.6, 136.1, 143.8, 152.5, 154.1, 161.2; LC-MS: *m/z* [M + H]<sup>+</sup> calcd for C<sub>22</sub>H<sub>20</sub>BrN<sub>6</sub>O<sup>+</sup> 463.08; found, 463.54. *Anal.* Calculated for C<sub>22</sub>H<sub>19</sub>BrN<sub>6</sub>O (MW: 463.33) C, 57.03; H, 4.13; N, 18.14%. Found: C, 56.78; H, 3.81; N, 17.81%.

5-(5-Bromo-1-methyl-1*H*-indol-3-yl)-6-(5-methoxy-1-methyl-1*H*-indol-3-yl)-1,2,4-triazin-3-amine (**6l**). Yield: 29% (overall yield: 94%); yellow solid; m.p.: 260.5 °C; IR (cm<sup>-1</sup>): 3479/3292 (NH<sub>2</sub>); <sup>1</sup>H NMR (DMSO-*d*<sub>6</sub>, 200 MHz)  $\delta$ : 3.59 (s, 3H), 3.68 (s, 3H), 3.82 (s, 3H), 6.85 (d, 1H, *J*=8.7 Hz), 6.96 (s, 2H), 7.22 (s, 1H), 7.29-7.36 (m, 2H), 7.51-7.57 (m, 3H), 7.74 (m, 1H); <sup>13</sup>C{<sup>1</sup>H} NMR (DMSO-*d*<sub>6</sub>, 50 MHz)  $\delta$ : 33.3, 33.6, 55.7, 105.1, 109.8, 111.5, 111.6, 112.6, 112.7, 112.8, 122.7, 124.4, 127.6, 128.3, 131.4, 132.5, 134.7, 135.9, 143.0, 153.3, 155.2, 161.2. LC-MS: *m/z* [M + H]<sup>+</sup> calcd for C<sub>22</sub>H<sub>20</sub>BrN<sub>6</sub>O<sup>+</sup> 463.08; found, 463.43. *Anal.* Calculated for C<sub>22</sub>H<sub>19</sub>BrN<sub>6</sub>O (MW: 463.33) C, 57.03; H, 4.13; N, 18.14%. Found: C, 56.82; H, 3.92; N, 17.87%.

6-(1*H*-indol-3-yl)-5-(1-methyl-1*H*-indol-3-yl)-1,2,4-triazin-3-amine (**5m**). Yield: 43% (overall yield: 94%); yellow solid; m.p.: 246.6 °C; IR (cm<sup>-1</sup>): 3634/3468 (NH<sub>2</sub>), 3290 (NH); <sup>1</sup>H NMR (DMSO-*d*<sub>6</sub>, 200 MHz)  $\delta$ : 3.51 (s, 3H), 6.88-6.95 (m, 3H), 7.01 (s, 1H), 7.09-7.22 (m, 3H), 7.28-7.25 (m, 1H), 7.42-7.50 (m, 2H), 7.56 (d, 1H, *J*=2.5 Hz), 8.51-8.54 (m, 1H), 11.42 (s, 1H); <sup>13</sup>C{<sup>1</sup>H} NMR (DMSO-*d*<sub>6</sub>, 50 MHz)  $\delta$ : 33.4, 110.3, 110.7, 112.3, 112.9, 119.7, 120.3, 121.4, 121.9, 122.9, 123.5, 125.8, 126.2, 127.2, 134.5, 136.6, 137.3, 143.9, 153.4, 161.3. LC-MS: *m/z* [M + H]<sup>+</sup> calcd for C<sub>20</sub>H<sub>17</sub>N<sub>6</sub><sup>+</sup> 341.14; found, 341.39. *Anal.* Calculated for C<sub>20</sub>H<sub>16</sub>N<sub>6</sub> (MW: 340.38): C, 70.57; H, 4.74; N, 24.69%. Found: C, 70.77; H, 4.62; N, 24.39%.

5-(1*H*-Indol-3-yl)-6-(1-methyl-1*H*-indol-3-yl)-1,2,4-triazin-3-amine (**6m**). Yield: 51% (overall yield: 94%); yellow solid; m.p.: 311.3 °C; IR (cm<sup>-1</sup>): 3445/3404 (NH<sub>2</sub>), 3262 (NH); <sup>1</sup>H NMR (DMSO-*d*<sub>6</sub>, 200 MHz)  $\delta$ : 3.89 (s, 3H), 6.88-6.98 (m, 4H), 7.08-7.21 (m, 4H), 7.37 (s, 1H), 7.52-7.56 (m, 1H), 7.65 (s, 1H), 8.65-8.70 (m, 1H), 11.39 (s, 1H); <sup>13</sup>C{<sup>1</sup>H} NMR (DMSO-*d*<sub>6</sub>, 50 MHz)  $\delta$ : 32.6, 110.2, 110.3, 111.8, 112.0, 119.4, 119.8, 120.7, 121.4, 121.5, 122.4, 122.5, 123.1, 125.9, 126.4, 129.4, 130.7, 136.1, 136.6, 160.7. LC-MS: *m/z* [M + H]<sup>+</sup> calcd for C<sub>20</sub>H<sub>17</sub>N<sub>6</sub><sup>+</sup> 341.14; found, 341.35. *Anal.* Calculated for C<sub>20</sub>H<sub>16</sub>N<sub>6</sub> (MW: 340.38): C, 70.57; H, 4.74; N, 24.69%. Found: C, 70.66; H, 4.52; N, 24.51%.

5-(5-Fluoro-1-methyl-1*H*-indol-3-yl)-6-(1*H*-indol-3-yl)-1,2,4-triazin-3-amine (**5n**). Yield: 42% (overall yield: 80%); yellow solid; m.p.: 254.3 °C; IR (cm<sup>-1</sup>): 3460/3400 (NH<sub>2</sub>), 3260 (NH); <sup>1</sup>H NMR (DMSO-*d*<sub>6</sub>, 200 MHz)  $\delta$ : 3.88 (s, 3H), 6.83-6.86 (m, 1H), 6.95 (s, 2H), 7.00-7.04 (m, 2H), 7.22-7.12 (m, 2H), 7.38-7.40 (m, 1H), 7.56 (dd, 1H, *J*=9.8, 5.2 Hz), 7.70 (s, 1H), 8.59-8.61 (m, 1H), 11.41 (s, 1H); <sup>13</sup>C{<sup>1</sup>H} NMR (DMSO-*d*<sub>6</sub>, 50 MHz)  $\delta$ : 33.4, 105.0 (d, *J*=23.8 Hz), 110.2 (d, *J*=26.1 Hz), 110.8, 111.9 (d, *J*=9.8 Hz), 112.3, 112.6 (d, *J*=4.8 Hz), 121.2, 122.9, 123.5, 126.7 (d, *J*=10.4 Hz), 126.8, 130.8, 131.8, 133.9, 136.7, 143.0, 153.7, 157.7 (d, *J*=232.9 Hz), 161.4. LC-MS: *m/z* [M + H]<sup>+</sup> calcd for C<sub>20</sub>H<sub>16</sub>FN<sub>6</sub><sup>+</sup> 359.13; found, 359.25. *Anal.* Calculated for C<sub>20</sub>H<sub>15</sub>FN<sub>6</sub> (MW: 358.37) C, 67.03; H, 4.22; N, 23.45%. Found: C, 67.22; H, 3.88; N, 23.30%.



6-(5-Fluoro-1-methyl-1H-indol-3-yl)-5-(1H-indol-3-yl)-1,2,4-triazin-3-amine (**6n**). Yield: 38% (overall yield: 80%); yellow solid; m.p.: 277.3 °C; IR (cm<sup>-1</sup>): 3493/3287 (NH<sub>2</sub>), 3138 (NH); <sup>1</sup>H NMR (DMSO-*d*<sub>6</sub>, 200 MHz) δ: 3.50 (s, 3H), 6.90-7.00 (m, 4H), 7.07-7.22 (m, 3H), 7.44-7.51 (m, 2H), 7.59 (s, 1H), 8.32-8.35 (m, 1H), 11.43 (s, 1H); <sup>13</sup>C{<sup>1</sup>H} NMR (DMSO-*d*<sub>6</sub>, 50 MHz) δ: 33.7, 108.61 (d, *J*=25.2 Hz), 110.0 (d, *J*=4.6 Hz), 111.0 (d, *J*=26.3 Hz), 112.0, (d, *J*=10.1 Hz), 112.4, 112.8, 119.8, 120.1, 122.0, 125.8, 126.1, 127.8 (d, *J*=11.2 Hz), 134.0, 136.0, 136.6, 143.5, 153.1, 160.3 (d, *J*=233.2 Hz), 161.2. LC-MS: *m/z* [M + H]<sup>+</sup> calcd for C<sub>20</sub>H<sub>16</sub>FN<sub>6</sub><sup>+</sup> 359.13; found, 359.27. *Anal.* Calculated for C<sub>20</sub>H<sub>15</sub>FN<sub>6</sub> (MW: 358.37) C, 67.03; H, 4.22; N, 23.45%. Found: C, 67.18; H, 3.94; N, 23.20%.

5-(5-Bromo-1-methyl-1H-indol-3-yl)-6-(1H-indol-3-yl)-1,2,4-triazin-3-amine (**5o**). Yield: 60% (overall yield: 91%); yellow solid; m.p.: 271.0 °C; IR (cm<sup>-1</sup>): 3472/3367 (NH<sub>2</sub>), 3314 (NH); <sup>1</sup>H NMR (DMSO-*d*<sub>6</sub>, 200 MHz) δ: 3.86 (s, 3H), 6.97 (s, 2H), 7.06 (s, 1H), 7.12-7.22 (m, 2H), 7.30 (dd, 1H, *J*=8.7, 1.5 Hz), 7.37-7.41 (m, 2H), 7.54 (d, 1H, *J*=8.7 Hz), 7.65 (s, 1H), 8.56-8.58 (m, 1H), 11.41 (s, 1H); <sup>13</sup>C{<sup>1</sup>H} NMR (DMSO-*d*<sub>6</sub>, 50 MHz) δ: 33.3, 110.8, 112.1, 112.4, 112.7, 112.9, 121.2, 122.5, 122.9, 123.4, 124.5, 126.8, 128.3, 130.8, 131.4, 135.9, 136.7, 142.8, 153.8, 161.4; LC-MS: *m/z* [M + H]<sup>+</sup> calcd for C<sub>20</sub>H<sub>16</sub>BrN<sub>6</sub><sup>+</sup> 419.05; found, 419.30. *Anal.* Calculated for C<sub>20</sub>H<sub>15</sub>BrN<sub>6</sub> (MW:419.28) C, 57.29; H, 3.61; N, 24.04%. Found: C, 57.17; H, 3.39; N, 23.82%.

6-(5-Bromo-1-methyl-1H-indol-3-yl)-5-(1H-indol-3-yl)-1,2,4-triazin-3-amine (**6o**). Yield: 31% (overall yield: 91%); yellow solid; m.p.: 291.0 °C; IR (cm<sup>-1</sup>): 3485/3308 (NH<sub>2</sub>), 3198 (NH); <sup>1</sup>H NMR (DMSO-*d*<sub>6</sub>, 200 MHz) δ: 3.50 (s, 3H), 6.89-6.94 (m, 1H), 7.03 (m, 2H), 7.10-7.15 (m, 1H), 7.18-7.21 (m, 1H), 7.34-7.38 (m, 2H), 7.43 (d, 1H, *J*=8.7 Hz), 7.47-7.50 (m, 1H), 7.57 (d, 1H, *J*=1.7 Hz), 8.64 (s, 1H), 11.43 (s, 1H); <sup>13</sup>C{<sup>1</sup>H} NMR (DMSO-*d*<sub>6</sub>, 50 MHz) δ: 33.6, 109.8, 112.4, 112.6, 112.9, 114.6, 119.8, 120.1, 122.0, 125.4, 125.5, 125.9, 126.0, 128.8, 135.6, 136.1, 136.6, 143.8, 153.0, 161.2; LC-MS: *m/z* [M + H]<sup>+</sup> calcd for C<sub>20</sub>H<sub>16</sub>BrN<sub>6</sub><sup>+</sup> 419.05; found, 419.29. *Anal.* Calculated for C<sub>20</sub>H<sub>15</sub>BrN<sub>6</sub> (MW: 419.28) C, 57.29; H, 3.61; N, 24.04%. Found: C, 57.41; H, 3.43; N, 23.95%.

6-(1H-Indol-3-yl)-5-(5-methoxy-1-methyl-1H-indol-3-yl)-1,2,4-triazin-3-amine (**5p**). Yield: 47% (overall yield: 81%); yellow solid; m.p.: 288.4 °C; IR (cm<sup>-1</sup>): 3499/3368 (NH<sub>2</sub>), 3190 (NH); <sup>1</sup>H NMR (DMSO-*d*<sub>6</sub>, 200 MHz) δ: 3.39 (s, 3H), 3.85 (s, 3H), 6.50-6.51 (m, 1H), 6.79 (dd, 1H, *J*=8.8, 2.2 Hz), 6.95 (s, 2H), 7.04 (d, 1H, *J*=2.8 Hz), 7.13-7.21 (m, 2H), 7.37-7.43 (m, 2H), 7.59 (s, 1H), 8.60 (m, 1H), 11.39 (s, 1H); <sup>13</sup>C{<sup>1</sup>H} NMR (DMSO-*d*<sub>6</sub>, 50 MHz): δ: 33.3, 55.4, 101.8, 110.9, 111.5, 112.0, 112.1, 112.3, 121.2, 122.9, 123.3, 126.7, 126.9, 130.4, 131.1, 132.3, 136.6, 143.6, 154.0, 154.1, 161.1. LC-MS: *m/z* [M + H]<sup>+</sup> calcd for C<sub>21</sub>H<sub>19</sub>N<sub>6</sub>O<sup>+</sup> 371.15; found, 371.28. *Anal.* Calculated for C<sub>21</sub>H<sub>18</sub>N<sub>6</sub>O (MW: 370.41) C, 68.09; H, 4.90; N, 22.69%. Found: C, 68.25; H, 4.75; N, 22.84%.

5-(1H-Indol-3-yl)-6-(5-methoxy-1-methyl-1H-indol-3-yl)-1,2,4-triazin-3-amine (**6p**). Yield: 34% (overall yield: 81%); yellow solid; m.p.: 279.6 °C; IR (cm<sup>-1</sup>): 3480/3397 (NH<sub>2</sub>), 3119 (NH); <sup>1</sup>H NMR (DMSO-*d*<sub>6</sub>, 200 MHz) δ: 3.51 (s, 3H), 3.63 (s, 3H), 6.82 (dd, 1H, *J*=8.8, 2.5 Hz), 6.92-6.97 (m, 3H), 7.08-7.15 (m, 2H), 7.30-7.34 (m, 2H), 7.46-7.48 (m, 2H), 7.74 (d, 1H, *J*=2.4 Hz), 11.36 (s, 1H); <sup>13</sup>C{<sup>1</sup>H} NMR (DMSO-*d*<sub>6</sub>, 50 MHz) δ: 33.5, 55.6, 105.1, 110.1, 111.4, 112.3, 112.6, 112.9, 119.8, 120.3, 121.9, 125.8, 126.2, 127.6, 132.4, 134.7, 136.6, 143.9, 153.4, 155.2, 161.2; LC-MS: *m/z* [M + H]<sup>+</sup> calcd for C<sub>21</sub>H<sub>19</sub>N<sub>6</sub>O<sup>+</sup> 371.15; found, 371.30. *Anal.* Calculated for C<sub>21</sub>H<sub>18</sub>N<sub>6</sub>O (MW: 370.41) C, 68.09; H, 4.90; N, 22.69%. Found: C, 68.21; H, 5.04; N, 22.95%.

6-(5-Bromo-1H-indol-3-yl)-5-(1-methyl-1H-indol-3-yl)-1,2,4-triazin-3-amine (**5q**). Yield: 40% (overall yield: 74%); yellow solid; m.p.: 230.0 °C; IR (cm<sup>-1</sup>): 3466/3372 (NH<sub>2</sub>), 3181 (NH); <sup>1</sup>H NMR (DMSO-*d*<sub>6</sub>, 200 MHz) δ: 3.89 (s, 3H), 6.89-6.94 (m, 1H), 7.01-7.08 (m, 4H), 7.14-7.19 (m, 1H), 7.30 (dd, 1H, *J*=8.6, 1.8 Hz), 7.35 (d, 1H, *J*=8.6 Hz), 7.52-7.54 (m, 1H), 7.66 (s, 1H), 8.76 (d, 1H, *J*=1.5 Hz), 11.55 (d, *J*=2.1 Hz, 1H); <sup>13</sup>C{<sup>1</sup>H} NMR (DMSO-*d*<sub>6</sub>, 50 MHz): δ: 33.1, 110.5, 110.7, 112.3, 114.2, 114.3, 120.0, 120.2, 122.0, 125.4, 125.5, 126.3, 128.5, 129.9, 132.2, 135.4, 137.1, 143.3, 153.4, 161.3. LC-MS: *m/z* [M + H]<sup>+</sup> calcd for C<sub>20</sub>H<sub>16</sub>BrN<sub>6</sub><sup>+</sup> 419.05; found, 419.32. *Anal.* Calculated for C<sub>20</sub>H<sub>15</sub>BrN<sub>6</sub> (MW: 419.28) C, 57.29; H, 3.61; N, 20.04%. Found: C, 57.38; H, 3.85; N, 20.19%.

5-(5-Bromo-1H-indol-3-yl)-6-(1-methyl-1H-indol-3-yl)-1,2,4-triazin-3-amine (**6q**). Yield: 34% (overall yield: 74%); yellow solid; m.p.: 304.0 °C; IR (cm<sup>-1</sup>): 3483/3275 (NH<sub>2</sub>), 3134 (NH); <sup>1</sup>H NMR (DMSO-*d*<sub>6</sub>, 200 MHz) δ: 3.60 (s, 3H), 6.97 (s, 2H), 7.11-7.13 (m, 1H), 7.17 (s, 1H), 7.21-7.27 (m, 2H), 7.44-7.47 (m, 2H), 7.53-7.57 (m, 2H), 8.36 (d, 1H, *J*=7.9 Hz), 11.58 (d, 1H, *J*= 1.7 Hz); <sup>13</sup>C{<sup>1</sup>H} NMR (DMSO-*d*<sub>6</sub>, 50 MHz): δ: 33.4, 110.3, 110.8, 112.3, 112.4, 114.3, 121.3, 122.6, 122.9, 123.2, 124.5, 127.0, 127.4, 128.1, 134.2, 135.3, 137.4, 143.6, 153.3, 161.3; LC-MS: *m/z* [M

+ H]<sup>+</sup> calcd for C<sub>20</sub>H<sub>16</sub>BrN<sub>6</sub><sup>+</sup> 419.05; found, 419.29. *Anal.* Calculated for C<sub>20</sub>H<sub>15</sub>BrN<sub>6</sub> (MW: 419.28) C, 57.29; H, 3.61; N, 20.04%. Found: C, 57.43; H, 3.87; N, 20.15%.

6-(5-Bromo-1H-indol-3-yl)-5-(5-bromo-1-methyl-1H-indol-3-yl)-1,2,4-triazin-3-amine (**5r**). Yield: 42% (overall yield: 90%); yellow solid; m.p.: 239.0 °C; IR (cm<sup>-1</sup>): 3360/3317 (NH<sub>2</sub>), 3254 (NH); <sup>1</sup>H NMR (DMSO-*d*<sub>6</sub>, 200 MHz) δ: 3.62 (s, 3H), 7.09 (s, 2H), 7.20 (s, 1H), 7.26-7.29 (m, 1H), 7.38-7.41 (m, 1H), 7.47-7.59 (m, 4H), 8.52 (m, 1H), 11.63 (s, 1H); <sup>13</sup>C{<sup>1</sup>H} NMR (DMSO-*d*<sub>6</sub>, 50 MHz) δ: 33.6, 109.9, 112.2, 112.5, 113.0, 114.4, 114.6, 122.5, 124.5, 125.2, 125.5, 127.5, 128.1, 128.7, 135.3, 135.4, 136.2, 143.4, 152.8, 161.3; LC-MS: *m/z* [M + H]<sup>+</sup> calcd for C<sub>20</sub>H<sub>15</sub>Br<sub>2</sub>N<sub>6</sub><sup>+</sup> 496.96; found, 497.30. *Anal.* Calculated for C<sub>20</sub>H<sub>14</sub>Br<sub>2</sub>N<sub>6</sub> (MW: 498.17) C, 48.22; H, 2.83; N, 16.87%. Found: C, 48.35; H, 2.60; N, 16.61%.

5-(5-Bromo-1H-indol-3-yl)-6-(5-bromo-1-methyl-1H-indol-3-yl)-1,2,4-triazin-3-amine (**6r**). Yield: 48% (overall yield: 90%); yellow solid; m.p.: 282.4 °C; IR (cm<sup>-1</sup>): 3472/3275 (NH<sub>2</sub>), 3184 (NH); <sup>1</sup>H NMR (DMSO-*d*<sub>6</sub>, 200 MHz) δ: 3.90 (s, 3H), 7.11-7.13 (m, 3H), 7.31-7.36 (m, 3H), 7.41 (d, 1H, *J*=8.4 Hz), 7.57 (d, 1H, *J*=8.6 Hz), 7.69 (s, 1H), 8.69 (m, 1H), 11.63 (s, 1H); <sup>13</sup>C{<sup>1</sup>H} NMR (DMSO-*d*<sub>6</sub>, 50 MHz) δ: 33.4, 110.5, 111.8, 112.8, 112.9, 114.2, 114.4, 122.5, 124.5, 125.3, 125.6, 128.2, 128.5, 131.5, 132.0, 135.4, 135.9, 142.8, 153.3, 161.4. LC-MS: *m/z* [M + H]<sup>+</sup> calcd for C<sub>21</sub>H<sub>18</sub>BrN<sub>6</sub>O<sup>+</sup> 498.96; found, 499.17. *Anal.* Calculated for C<sub>20</sub>H<sub>14</sub>Br<sub>2</sub>N<sub>6</sub> (MW: 498.17) C, 48.22; H, 2.83; N, 16.87%. Found: C, 48.37; H, 2.64; N, 16.71%.

6-(5-Bromo-1H-indol-3-yl)-5-(5-methoxy-1-methyl-1H-indol-3-yl)-1,2,4-triazin-3-amine (**5s**). Yield: 40% (overall yield: 78%); yellow solid; m.p.: 201.8 °C; IR (cm<sup>-1</sup>): 3474/3277 (NH<sub>2</sub>), 3179 (NH); <sup>1</sup>H NMR (DMSO-*d*<sub>6</sub>, 200 MHz) δ: 3.38 (s, 3H), 3.85 (s, 3H), 6.46 (d, 1H, *J*=1.9 Hz), 6.78 (dd, 1H, *J*=8.9, 2.4 Hz), 7.03 (s, 2H), 7.07 (d, 1H, *J*=2.8 Hz), 7.30 (dd, 1H, *J*=1.9 Hz, 8.6 Hz), 7.37 (d, 1H, *J*=8.6 Hz), 7.42 (d, 1H, *J*=8.9 Hz), 7.61 (s, 1H), 8.69 (d, 1H, *J*=1.6 Hz), 11.56 (m, 1H); <sup>13</sup>C{<sup>1</sup>H} NMR (DMSO-*d*<sub>6</sub>, 50 MHz) δ: 33.3, 55.1, 101.8, 110.6, 111.5, 111.8, 112.1, 114.2, 114.3, 125.1, 125.5, 126.6, 128.5, 130.4, 132.2, 132.4, 135.4, 143.6, 153.3, 154.1, 161.1; LC-MS: *m/z* [M + H]<sup>+</sup> calcd for C<sub>21</sub>H<sub>18</sub>BrN<sub>6</sub>O<sup>+</sup> 449.06; found, 449.30. *Anal.* Calculated for C<sub>21</sub>H<sub>17</sub>BrN<sub>6</sub>O (MW: 449.30) C, 56.14; H, 3.81; N, 18.70%. Found: C, 55.81; H, 3.62; N, 18.95%.

5-(5-Bromo-1H-indol-3-yl)-6-(5-methoxy-1-methyl-1H-indol-3-yl)-1,2,4-triazin-3-amine (**6s**). Yield: 38% (overall yield: 78%); yellow solid; m.p.: 207.7 °C; IR (cm<sup>-1</sup>): 3428/3315 (NH<sub>2</sub>), 3169 (NH); <sup>1</sup>H NMR (DMSO-*d*<sub>6</sub>, 200 MHz) δ: 3.60 (s, 6H), 6.82 (dd, 1H, *J*=8.8, 2.4 Hz), 6.95 (s, 2H), 7.20 (s, 1H), 7.25 (dd, 1H, *J*=8.6, 1.8 Hz), 7.35 (d, 1H, *J*=8.8 Hz), 7.45 (d, 1H, *J*=8.6 Hz), 7.48 (d, 1H, *J*=2.4 Hz), 7.59-7.60 (m, 2H), 11.53 (m, 1H); <sup>13</sup>C{<sup>1</sup>H} NMR (DMSO-*d*<sub>6</sub>, 50 MHz) δ: 33.6, 55.6, 104.8, 110.1, 111.5, 112.3, 112.4, 112.7, 114.3, 122.5, 124.5, 127.3, 127.4, 128.2, 132.5, 134.6, 135.3, 143.5, 153.4, 155.2, 161.1; LC-MS: *m/z* [M + H]<sup>+</sup> calcd for C<sub>21</sub>H<sub>18</sub>BrN<sub>6</sub>O<sup>+</sup> 449.06; found, 449.32. *Anal.* Calculated for C<sub>21</sub>H<sub>17</sub>BrN<sub>6</sub>O (MW: 449.30) C, 56.14; H, 3.81; N, 18.70%. Found: C, 55.88; H, 3.72; N, 18.93%.

6-(5-Bromo-1H-indol-3-yl)-5-(5-fluoro-1-methyl-1H-indol-3-yl)-1,2,4-triazin-3-amine (**5t**). Yield: 44% (overall yield: 86%); yellow solid; m.p.: 266.9 °C; IR (cm<sup>-1</sup>): 3487/3275 (NH<sub>2</sub>), 3132 (NH); <sup>1</sup>H NMR (DMSO-*d*<sub>6</sub>, 200 MHz) δ: 3.89 (s, 3H), 6.82 (dd, 1H, *J*=9.4, 2.4 Hz), 6.99-7.10 (m, 4H), 7.32 (dd, 1H, *J*=8.6, 1.7 Hz), 7.38 (d, 1H, *J*=8.6 Hz), 7.56 (dd, 1H, *J*=8.9, 4.4 Hz), 7.74 (m, 1H), 8.69 (s, 1H, *J*=1.2 Hz), 11.60 (s, 1H); <sup>13</sup>C{<sup>1</sup>H} NMR (DMSO-*d*<sub>6</sub>, 50 MHz) δ: 33.4, 104.9 (d, *J*=23.7 Hz), 110.2 (d, *J*=26.6 Hz), 110.5, 110.6 (d, *J*=4.2 Hz), 111.9 (d, *J*=9.9 Hz), 114.3, 114.4, 125.3, 125.6, 126.5 (d, *J*=10.4 Hz), 128.4, 131.9, 132.1, 133.9, 135.4, 142.9, 153.3, 157.7 (d, *J*=232.9 Hz), 161.2; LC-MS: *m/z* [M + H]<sup>+</sup> calcd for C<sub>20</sub>H<sub>15</sub>BrFN<sub>6</sub><sup>+</sup> 437.04; found, 437.30. *Anal.* Calculated for C<sub>20</sub>H<sub>14</sub>BrFN<sub>6</sub> (MW: 437.27) C, 54.94; H, 3.23; N, 19.22%. Found: C, 54.80; H, 3.11; N, 19.01%.

5-(5-Bromo-1H-indol-3-yl)-6-(5-fluoro-1-methyl-1H-indol-3-yl)-1,2,4-triazin-3-amine (**6t**). Yield: 42% (overall yield: 86%); yellow solid; m.p.: 314.3 °C; IR (cm<sup>-1</sup>): 3499/3300 (NH<sub>2</sub>), 3150 (NH); <sup>1</sup>H NMR (DMSO-*d*<sub>6</sub>, 200 MHz) δ: 3.58 (s, 3H), 7.03-7.14 (m, 4H), 7.26 (dd, 1H, *J*=8.5, 1.9 Hz), 7.45-7.51 (m, 3H), 7.60 (d, 1H, *J*=2.3 Hz), 8.21 (dd, 1H, *J*=10.7, 2.6 Hz), 11.61-11.62 (m, 1H); <sup>13</sup>C{<sup>1</sup>H} NMR (DMSO-*d*<sub>6</sub>, 50 MHz) δ: 33.8, 108.5 (d, *J*=24.9 Hz), 110.0 (d, *J*=4.5 Hz), 111.2 (d, *J*=26.4 Hz), 112.0, 112.2 (d, *J*=10.3 Hz), 112.5, 114.4, 122.4, 124.6, 127.5, 127.7 (d, *J*=11.2 Hz), 128.1, 134.1, 135.4, 136.1, 143.1, 153.5, 160.3 (d, *J*=233.3 Hz), 160.8. LC-MS: *m/z* [M + H]<sup>+</sup> calcd for C<sub>20</sub>H<sub>15</sub>BrFN<sub>6</sub><sup>+</sup> 437.04; found, 437.35. *Anal.* Calculated for C<sub>20</sub>H<sub>14</sub>BrFN<sub>6</sub> (MW: 437.27): C, 54.94; H, 3.23; N, 19.22%. Found: C, 54.83; H, 3.31; N, 19.03%.

5-(5-Fluoro-1-methyl-1H-indol-3-yl)-6-(5-fluoro-1H-indol-3-yl)-1,2,4-triazin-3-amine (**5u**). Yield: 37% (overall yield: 79%); yellow solid; m.p.: 276.0 °C; IR (cm<sup>-1</sup>): 3491/3285 (NH<sub>2</sub>), 3138 (NH); <sup>1</sup>H NMR (DMSO-*d*<sub>6</sub>, 200 MHz) δ: 3.58 (s, 3H), 6.98-7.12 (m, 6H), 7.48-7.53 (m, 2H), 7.68 (m, 1H), 8.30 (dd, 1H, *J*=10.5, 2.1 Hz), 11.57 (s, 1H); <sup>13</sup>C{<sup>1</sup>H} NMR (DMSO-*d*<sub>6</sub>, 50 MHz) δ: 33.8, 104.8 (d, *J*=23.7 Hz), 108.6 (d, *J*=25.0 Hz), 110.2 (d, *J*=5.0 Hz), 110.3 (d, *J*=26.2 Hz), 111.0 (d, *J*=27.0 Hz), 112.1 (d, *J*=9.9 Hz), 113.0 (d, *J*=4.7 Hz), 113.4 (d, *J*=9.8 Hz), 126.5 (d, *J*=10.1 Hz), 127.7 (d, *J*=11.2 Hz), 127.9, 133.3, 134.1, 135.8, 143.3, 152.9, 157.6 (d, *J*=232.0 Hz), 158.7 (d, *J*=233.2 Hz), 161.3. LC-MS: *m/z* [M + H]<sup>+</sup> calcd for C<sub>20</sub>H<sub>15</sub>F<sub>2</sub>N<sub>6</sub><sup>+</sup> 377.12; found, 377.25. *Anal.* Calculated for C<sub>20</sub>H<sub>14</sub>F<sub>2</sub>N<sub>6</sub> (MW:376.36): C, 63.83; H, 3.75; N, 22.33%. Found: C, 63.61; H, 3.82; N, 22.11%.

6-(5-Fluoro-1H-indol-3-yl)-5-(5-fluoro-1-methyl-1H-indol-3-yl)-1,2,4-triazin-3-amine (**6u**). Yield: 42% (overall yield: 79%); yellow solid; m.p.: 259.5 °C; IR (cm<sup>-1</sup>): 3468/3298 (NH<sub>2</sub>), 3192 (NH); <sup>1</sup>H NMR (DMSO-*d*<sub>6</sub>, 200 MHz) δ: 3.89 (s, 3H), 6.84 (dd, 1H, *J*=9.9, 2.4 Hz), 7.00-7.08 (m, 5H), 7.40 (dd, 1H, *J*=8.9, 4.8 Hz), 7.54 (dd, 1H, *J*=8.9, 4.5 Hz), 7.73 (s, 1H), 8.40 (dd, 1H, *J*=10.7, 2.4 Hz), 11.51 (s, 1H); <sup>13</sup>C{<sup>1</sup>H} NMR (DMSO-*d*<sub>6</sub>, 50 MHz): δ: 33.4, 104.9 (d, *J*=21.9 Hz), 108.5 (d, *J*=25.0 Hz), 110.2 (d, *J*=26.1 Hz), 110.8 (d, *J*=4.7 Hz), 111.1 (d, *J*=26.3 Hz), 112.0 (d, *J*=9.8 Hz), 112.5 (d, *J*=4.7 Hz), 113.4 (d, *J*=9.8 Hz), 126.6 (d, *J*=10.2 Hz), 127.4 (d, *J*=11.2 Hz), 131.9, 132.5, 133.3, 133.9, 142.7, 153.4, 157.8 (d, *J*=222.3 Hz), 158.6 (d, *J*=232.1 Hz), 161.4; LC-MS: *m/z* [M + H]<sup>+</sup> calcd for C<sub>20</sub>H<sub>15</sub>F<sub>2</sub>N<sub>6</sub><sup>+</sup> 377.12; found, 377.26. *Anal.* Calculated for C<sub>20</sub>H<sub>14</sub>F<sub>2</sub>N<sub>6</sub> (MW: 376.36) C, 63.83; H, 3.75; N, 22.33%. Found: C, 63.65; H, 3.94; N, 22.15%.

6-(5-Fluoro-1H-indol-3-yl)-5-(1-methyl-1H-indol-3-yl)-1,2,4-triazin-3-amine (**5v**). Yield: 38% (overall yield: 84%); yellow solid; m.p.: 285.9 °C; IR (cm<sup>-1</sup>): 3443/3294 (NH<sub>2</sub>), 3144 (NH); <sup>1</sup>H NMR (DMSO-*d*<sub>6</sub>, 200 MHz) δ: 3.60 (s, 3H), 6.97-7.29 (m, 7H), 7.47-7.50 (m, 2H), 7.62 (s, 1H), 8.44-8.47 (m, 1H), 11.52 (s, 1H). <sup>13</sup>C{<sup>1</sup>H} NMR (DMSO-*d*<sub>6</sub>, 50 MHz) δ: 33.4, 104.9 (d, *J*=23.7 Hz), 110.2 (d, *J*=26.7 Hz), 110.3, 110.8, 113.3 (d, *J*=4.8 Hz), 113.4 (d, *J*=9.4 Hz), 121.4, 122.9, 123.4, 126.5 (d, *J*=10.5 Hz), 127.1, 127.9, 133.3, 134.3, 137.3, 143.7, 153.2, 157.5 (d, *J*=232.7 Hz), 161.3; LC-MS: *m/z* [M + H]<sup>+</sup> calcd for C<sub>20</sub>H<sub>16</sub>FN<sub>6</sub><sup>+</sup> 359.13; found, 359.31. *Anal.* Calculated for C<sub>20</sub>H<sub>15</sub>FN<sub>6</sub> (MW: 358.37) C, 67.03; H, 4.22; N, 23.45%. Found: C, 66.83; H, 4.35; N, 23.12%.

5-(5-Fluoro-1H-indol-3-yl)-6-(1-methyl-1H-indol-3-yl)-1,2,4-triazin-3-amine (**6v**). Yield: 46% (overall yield: 84%); yellow solid; m.p.: 295.8 °C; IR (cm<sup>-1</sup>): 3468/3265 (NH<sub>2</sub>), 3173 (NH); <sup>1</sup>H NMR (DMSO-*d*<sub>6</sub>, 200 MHz) δ: 3.93 (s, 3H), 6.94-7.23 (m, 7H), 7.41 (dd, 1H, *J*=8.5, 4.7 Hz), 7.56-7.58 (m, 1H), 7.67-7.69 (m, 1H), 8.46-8.49 (m, 1H), 11.49 (s, 1H); <sup>13</sup>C{<sup>1</sup>H} NMR (DMSO-*d*<sub>6</sub>, 50 MHz) δ: 33.1, 108.6 (d, *J*=24.3 Hz), 110.7, 110.8 (d, *J*=4.7 Hz), 111.1 (d, *J*=26.2 Hz), 112.5, 113.4 (d, *J*=10.0 Hz), 120.0, 120.3, 122.0, 126.4, 127.5 (d, *J*=11.5 Hz), 129.9, 133.3, 137.1, 143.1, 153.6, 156.9, 158.5 (d, *J*=231.8 Hz), 161.4; LC-MS: *m/z* [M + H]<sup>+</sup> calcd for C<sub>20</sub>H<sub>16</sub>FN<sub>6</sub><sup>+</sup> 359.13; found, 359.24. *Anal.* Calculated for C<sub>20</sub>H<sub>15</sub>FN<sub>6</sub> (MW: 358.37) C, 67.03; H, 4.22; N, 23.45%. Found: C, 66.93; H, 4.36; N, 23.23%.

6-(5-Fluoro-1H-indol-3-yl)-5-(5-methoxy-1-methyl-1H-indol-3-yl)-1,2,4-triazin-3-amine (**5w**). Yield: 40% (overall yield: 84%); yellow solid; m.p.: 276.0 °C; IR (cm<sup>-1</sup>): 3482/3368 (NH<sub>2</sub>), 3144 (NH); <sup>1</sup>H NMR (DMSO-*d*<sub>6</sub>, 200 MHz) δ: 3.60 (s, 3H), 3.65 (s, 3H), 6.86 (dd, 1H, *J*=8.7, 1.7 Hz), 6.96 (s, 2H), 7.01-7.12 (m, 2H), 7.19 (s, 1H), 7.37 (d, 1H, *J*=8.7 Hz), 7.48-7.57 (m, 2H), 7.68 (s, 1H), 11.48 (s, 1H). <sup>13</sup>C{<sup>1</sup>H} NMR (DMSO-*d*<sub>6</sub>, 50 MHz) δ: 33.6, 55.6, 104.8, 104.9 (d, *J*=23.7 Hz), 110.1, 110.2 (d, *J*=26.0 Hz), 111.5, 112.7, 113.1 (d, *J*=4.2 Hz), 113.3 (d, *J*=9.8 Hz), 126.5 (d, *J*=10.2 Hz), 127.4, 127.9, 132.4, 133.3, 134.6, 143.6, 153.2, 155.2, 157.6 (d, *J*=232.1 Hz), 161.2; LC-MS: *m/z* [M + H]<sup>+</sup> calcd for C<sub>21</sub>H<sub>18</sub>FN<sub>6</sub>O<sup>+</sup> 389.14; found, 389.30. *Anal.* Calculated for C<sub>21</sub>H<sub>17</sub>FN<sub>6</sub>O (MW: 388.40) C, 64.94; H, 4.41; N, 21.64%. Found: C, 64.72; H, 4.09; N, 21.51%.

5-(5-Fluoro-1H-indol-3-yl)-6-(5-methoxy-1-methyl-1H-indol-3-yl)-1,2,4-triazin-3-amine (**6w**). Yield: 44% (overall yield: 84%); yellow solid; m.p.: 251.5 °C; IR (cm<sup>-1</sup>): 3482/3348 (NH<sub>2</sub>), 3125 (NH); <sup>1</sup>H NMR (DMSO-*d*<sub>6</sub>, 200 MHz) δ: 3.44 (s, 3H), 3.89 (s, 3H), 6.51 (m, 1H), 6.81-6.84 (m, 1H), 7.02-7.06 (m, 4H), 7.39-7.47 (m, 2H), 7.64 (s, 1H), 8.39-8.43 (m, 1H), 11.52 (s, 1H). <sup>13</sup>C{<sup>1</sup>H} NMR (DMSO-*d*<sub>6</sub>, 50 MHz) δ: 33.3, 55.4, 101.8, 108.3 (d, *J*=24.6 Hz), 110.8, 110.9 (d, *J*=4.6 Hz), 111.4 (d, *J*=21.2 Hz), 112.0, 112.1, 113.3 (d, *J*=9.8 Hz), 126.7, 127.4 (d, *J*=11.2 Hz), 130.3, 132.4, 132.6, 133.2, 143.3, 153.4, 154.1, 158.5 (d, *J*=232.5 Hz), 161.4; LC-MS: *m/z* [M + H]<sup>+</sup> calcd for C<sub>21</sub>H<sub>18</sub>FN<sub>6</sub>O<sup>+</sup> 389.14; found, 389.33. *Anal.* Calculated for C<sub>21</sub>H<sub>17</sub>FN<sub>6</sub>O (MW: 388.40) C, 64.94; H, 4.41; N, 21.64%. Found: C, 64.81; H, 4.29; N, 21.41%.

5-(5-Bromo-1-methyl-1H-indol-3-yl)-6-(5-fluoro-1H-indol-3-yl)-1,2,4-triazin-3-amine (**5x**). Yield: 43% (overall yield: 82%); yellow solid; m.p.: 267.6 °C; IR (cm<sup>-1</sup>): 3489/3265 (NH<sub>2</sub>), 3173 (NH); <sup>1</sup>H NMR (DMSO-*d*<sub>6</sub>, 200 MHz) δ: 3.88 (s, 3H), 7.01-7.08 (m, 4H), 7.31 (d, 1H, *J*=8.6, 1.7 Hz), 7.35 (d, 1H, *J*=1.4 Hz), 7.41 (d, 1H, *J*=8.8, 4.7 Hz),

7.55 (d, 1H,  $J=8.7$  Hz), 7.68 (s, 1H), 8.37 (dd, 1H,  $J=10.7, 2.5$  Hz), 11.52 (s, 1H);  $^{13}\text{C}\{^1\text{H}\}$  NMR (DMSO- $d_6$ , 50 MHz)  $\delta$ : 33.3, 108.4 (d,  $J=27.3$  Hz), 110.8 (d,  $J=4.6$  Hz), 111.1 (d,  $J=25.2$  Hz), 112.0, 112.7, 112.9, 113.4 (d,  $J=8.6$  Hz), 122.4, 124.5, 127.4 (d,  $J=11.1$  Hz), 128.3, 131.5, 132.4, 133.3, 135.9, 142.5, 153.5, 158.5 (d,  $J=232.8$  Hz), 161.4; LC-MS:  $m/z$   $[\text{M} + \text{H}]^+$  calcd for  $\text{C}_{20}\text{H}_{15}\text{BrFN}_6^+$  437.04; found, 437.24. *Anal.* Calculated for  $\text{C}_{20}\text{H}_{14}\text{BrFN}_6$  (MW: 437.27) C, 54.94; H, 3.23; N, 19.22%. Found: C, 55.02; H, 3.42; N, 19.36%.

6-(5-Bromo-1-methyl-1H-indol-3-yl)-5-(5-fluoro-1H-indol-3-yl)-1,2,4-triazin-3-amine (**6x**). Yield: 39% (overall yield: 82%); yellow solid; m.p.: 270.2 °C; IR ( $\text{cm}^{-1}$ ): 3489/3383 ( $\text{NH}_2$ ), 3138 (NH);  $^1\text{H}$  NMR (DMSO- $d_6$ , 200 MHz)  $\delta$ : 3.56 (s, 3H), 6.95-7.03 (m, 4H), 7.12 (s, 1H), 7.36 (d, 1H,  $J=8.7, 1.9$  Hz), 7.43 (s, 1H), 7.48 (dd, 1H,  $J=9.6, 4.6$  Hz), 7.61-7.62 (m, 1H), 8.52 (d, 1H,  $J=1.8$  Hz), 11.52 (s, 1H);  $^{13}\text{C}\{^1\text{H}\}$  NMR (DMSO- $d_6$ , 50 MHz)  $\delta$ : 33.6, 104.8 (d,  $J=25.7$  Hz), 109.9, 110.2 (d,  $J=26.3$  Hz), 112.8 (d,  $J=4.7$  Hz), 112.9, 113.4 (d,  $J=9.5$  Hz), 114.5, 125.2, 125.5, 126.4 (d,  $J=10.1$  Hz), 127.8, 128.7, 133.3, 135.3, 135.4, 136.1, 143.5, 152.7, 160.2 (d,  $J=232.0$  Hz), 161.3; LC-MS:  $m/z$   $[\text{M} + \text{H}]^+$  calcd for  $\text{C}_{20}\text{H}_{15}\text{BrFN}_6^+$  437.04; found, 437.10. *Anal.* Calculated for  $\text{C}_{20}\text{H}_{14}\text{BrFN}_6$  (MW: 437.27) C, 54.94; H, 3.23; N, 19.22%. Found: C, 55.05; H, 3.41; N, 19.39%.

5-(5-Methoxy-1-methyl-1H-indol-3-yl)-6-(5-methoxy-1H-indol-3-yl)-1,2,4-triazin-3-amine (**5y**). Yield: 33% (overall yield: 68%); yellow solid; m.p.: 205.5 °C; IR ( $\text{cm}^{-1}$ ): 3485-3300 ( $\text{NH}_2$ ), 3181 (NH);  $^1\text{H}$  NMR (DMSO- $d_6$ , 200 MHz)  $\delta$ : 3.51-3.64 (m, 9H), 6.75-6.78 (m, 2H), 6.83 (dd, 1H,  $J=8.8, 2.4$  Hz), 6.92 (s, 2H), 7.12 (s, 1H), 7.32-7.37 (m, 2H), 7.45 (d, 1H,  $J=2.5$  Hz), 7.68-7.69 (m, 1H), 11.23 (s, 1H);  $^{13}\text{C}\{^1\text{H}\}$  NMR (DMSO- $d_6$ , 50 MHz)  $\delta$ : 33.6, 55.5, 55.6, 101.7, 104.9, 110.2, 111.5, 112.3, 112.5, 112.7, 113.0, 126.4, 126.6, 127.6, 131.7, 132.4, 135.0, 144.1, 153.6, 154.0, 155.2, 160.8; LC-MS:  $m/z$   $[\text{M} + \text{H}]^+$  calcd for  $\text{C}_{22}\text{H}_{21}\text{N}_6\text{O}_2^+$  401.16; found, 401.35. *Anal.* Calculated for  $\text{C}_{22}\text{H}_{20}\text{N}_6\text{O}_2$  (MW: 400.43) C, 65.99; H, 5.03; N, 20.99%. Found: C, 65.75; H, 5.22; N, 21.10%.

6-(5-Methoxy-1-methyl-1H-indol-3-yl)-5-(5-methoxy-1H-indol-3-yl)-1,2,4-triazin-3-amine (**6y**). Yield: 35% (overall yield: 68%); yellow solid; m.p.: 263.3 °C; IR ( $\text{cm}^{-1}$ ): 3465/3315 ( $\text{NH}_2$ ), 3173 (NH);  $^1\text{H}$  NMR (DMSO- $d_6$ , 200 MHz)  $\delta$ : 3.43 (s, 3H), 3.77 (s, 3H), 3.84 (s, 3H), 6.53 (s, 1H), 6.82-6.79 (m, 2H), 6.93-7.02 (m, 3H), 7.25-7.28 (m, 1H), 7.40-7.43 (m, 1H), 7.57 (s, 1H), 7.99 (s, 1H), 11.30 (s, 1H);  $^{13}\text{C}\{^1\text{H}\}$  NMR (DMSO- $d_6$ , 50 MHz)  $\delta$ : 33.2, 55.4, 55.8, 101.9, 105.1, 110.7, 111.4, 112.1, 112.2, 112.7, 112.8, 126.8, 127.4, 130.3, 131.3, 131.5, 132.3, 143.6, 153.8, 154.1, 155.0, 161.3; LC-MS:  $m/z$   $[\text{M} + \text{H}]^+$  calcd for  $\text{C}_{22}\text{H}_{21}\text{N}_6\text{O}_2^+$  401.16; found, 401.36. *Anal.* Calculated for  $\text{C}_{22}\text{H}_{20}\text{N}_6\text{O}_2$  (MW: 400.43) C, 65.99; H, 5.03; N, 20.99%. Found: C, 65.71; H, 5.21; N, 21.15%.

6-(5-Methoxy-1H-indol-3-yl)-5-(1-methyl-1H-indol-3-yl)-1,2,4-triazin-3-amine (**5z**). Yield: 35% (overall yield: 67%); yellow solid; m.p.: 249.4 °C; IR ( $\text{cm}^{-1}$ ): 3447-3404 ( $\text{NH}_2$ ), 3150 (NH);  $^1\text{H}$  NMR (DMSO- $d_6$ , 200 MHz)  $\delta$ : 3.78 (s, 3H), 3.88 (s, 3H), 6.81 (dd, 1H,  $J=8.7, 2.2$  Hz), 6.91-6.98 (m, 4H), 7.12-7.20 (m, 2H), 7.26 (d, 1H,  $J=8.7$  Hz), 7.52-7.54 (m, 1H), 7.62 (s, 1H), 8.06 (d, 1H,  $J=1.9$  Hz), 11.28 (s, 1H);  $^{13}\text{C}\{^1\text{H}\}$  NMR (DMSO- $d_6$ , 50 MHz)  $\delta$ : 33.1, 55.9, 105.5, 110.6, 110.7, 112.6, 112.8, 112.9, 120.0, 120.4, 122.0, 126.4, 127.5, 129.9, 131.5, 131.6, 137.1, 143.3, 154.1, 155.1, 161.2; LC-MS:  $m/z$   $[\text{M} + \text{H}]^+$  calcd for  $\text{C}_{21}\text{H}_{19}\text{N}_6\text{O}^+$  371.15; found, 371.33. *Anal.* Calculated for  $\text{C}_{21}\text{H}_{18}\text{N}_6\text{O}$  (MW: 370.41) C, 68.09; H, 4.90; N, 22.69%. Found: C, 68.36; H, 5.01; N, 22.72%.

5-(5-Methoxy-1H-indol-3-yl)-6-(1-methyl-1H-indol-3-yl)-1,2,4-triazin-3-amine (**6z**). Yield: 32% (overall yield: 67%); yellow solid; m.p.: 243.3 °C; IR ( $\text{cm}^{-1}$ ): 3483/3275 ( $\text{NH}_2$ ), 3171 (NH);  $^1\text{H}$  NMR (DMSO- $d_6$ , 200 MHz)  $\delta$ : 3.45 (s, 3H), 3.54 (s, 3H), 6.65 (s, 1H), 6.74-6.77 (m, 1H), 6.91 (s, 2H), 7.06 (s, 1H), 7.13-7.26 (m, 2H), 7.37 (d, 1H,  $J=8.8$  Hz), 7.45-7.50 (m, 2H), 8.44-8.46 (m, 1H), 11.26 (s, 1H);  $^{13}\text{C}\{^1\text{H}\}$  NMR (DMSO- $d_6$ , 50 MHz)  $\delta$ : 33.5, 55.4, 101.7, 110.4, 110.8, 112.3, 112.4, 113.0, 121.5, 122.9, 123.3, 126.4, 126.5, 127.2, 131.7, 134.7, 137.3, 144.2, 153.7, 153.9, 160.9. LC-MS:  $m/z$   $[\text{M} + \text{H}]^+$  calcd for  $\text{C}_{21}\text{H}_{19}\text{N}_6\text{O}^+$  371.15; found, 371.35. *Anal.* Calculated for  $\text{C}_{21}\text{H}_{18}\text{N}_6\text{O}$  (MW: 370.41) C, 68.09; H, 4.90; N, 22.69%. Found: C, 68.28; H, 5.06; N, 22.82%.

5-(5-Bromo-1-methyl-1H-indol-3-yl)-6-(5-methoxy-1H-indol-3-yl)-1,2,4-triazin-3-amine (**5aa**). Yield: 37% (overall yield: 78%); yellow solid; m.p.: 267.8 °C; IR ( $\text{cm}^{-1}$ ): 3404/3291 ( $\text{NH}_2$ ), 3179 (NH);  $^1\text{H}$  NMR (DMSO- $d_6$ , 200 MHz)  $\delta$ : 3.45 (s, 3H), 3.53 (s, 3H), 6.61 (m, 1H), 6.76 (dd, 1H,  $J=9.0, 1.7$  Hz), 7.01 (s, 2H), 7.03 (s, 1H), 7.35-7.38 (m, 2H), 7.45 (d, 1H,  $J=8.7$  Hz), 7.53 (d, 1H,  $J=2.1$  Hz), 8.58 (d, 1H,  $J=1.2$  Hz), 11.29 (s, 1H);  $^{13}\text{C}\{^1\text{H}\}$  NMR (DMSO- $d_6$ , 50 MHz)  $\delta$ : 33.6, 55.4, 101.6, 110.0, 112.3, 112.4, 112.9, 113.0, 114.5, 125.1, 125.4, 126.3, 126.4, 128.7, 131.7, 135.5, 136.0, 144.1, 152.7, 153.9, 161.3; LC-MS:  $m/z$   $[\text{M} + \text{H}]^+$  calcd for  $\text{C}_{21}\text{H}_{18}\text{BrN}_6\text{O}^+$  449.06; found, 449.30. *Anal.* Calculated for  $\text{C}_{21}\text{H}_{17}\text{BrN}_6\text{O}$  (MW: 449.30) C, 56.14; H, 3.81; N, 18.70%. Found: C, 56.35; H, 3.69; N, 18.66%.

6-(5-Bromo-1-methyl-1H-indol-3-yl)-5-(5-methoxy-1H-indol-3-yl)-1,2,4-triazin-3-amine (**6aa**). Yield: 41% (overall yield: 78%); yellow solid; m.p.: 241.8 °C; IR (cm<sup>-1</sup>): 3422/3325 (NH<sub>2</sub>), 3298 (NH); <sup>1</sup>H NMR (DMSO-*d*<sub>6</sub>, 200 MHz) δ: 3.76 (s, 3H), 3.86 (s, 3H), 6.79-6.83 (m, 1H), 6.99-7.06 (m, 3H), 7.26-7.31 (m, 2H), 7.39 (s, 1H), 7.53 (dd, 1H, *J*=8.7, 2.1 Hz), 7.63 (d, 1H, *J*=1.9 Hz), 7.95 (s, 1H), 11.35 (s, 1H); <sup>13</sup>C{<sup>1</sup>H} NMR (DMSO-*d*<sub>6</sub>, 50 MHz) δ: 33.3, 55.8, 105.3, 110.6, 112.1, 112.7, 112.8 (x 2), 112.9, 122.5, 124.5, 127.3, 128.3, 131.2, 131.4, 131.6, 135.9, 142.7, 154.0, 155.1, 161.2; LC-MS: *m/z* [M + H]<sup>+</sup> calcd for C<sub>21</sub>H<sub>18</sub>BrN<sub>6</sub>O<sup>+</sup> 449.06; found, 449.37. *Anal.* Calculated for C<sub>21</sub>H<sub>17</sub>BrN<sub>6</sub>O (MW: 449.30) C, 56.14; H, 3.81; N, 18.70%. Found: C, 56.37; H, 3.79; N, 18.70%.

5-(5-Fluoro-1-methyl-1H-indol-3-yl)-6-(5-methoxy-1H-indol-3-yl)-1,2,4-triazin-3-amine (**5ab**). Yield: 39% (overall yield: 71%); yellow solid; m.p.: 250.3 °C; IR (cm<sup>-1</sup>): 3464/3424 (NH<sub>2</sub>), 3130 (NH); <sup>1</sup>H NMR (DMSO-*d*<sub>6</sub>, 200 MHz) δ: 3.76 (s, 3H), 3.87 (s, 3H), 6.82 (dd, 1H, *J*=8.8, 2.4 Hz), 6.87 (dd, 1H, *J*=9.9, 2.3 Hz), 6.95 (s, 2H), 6.99-7.06 (m, 2H), 7.28 (d, 1H, *J*=8.8 Hz), 7.54 (dd, 1H, *J*=9.9, 4.4 Hz), 7.68 (s, 1H), 7.98 (d, 1H, *J*=2.4 Hz), 11.31 (s, 1H); <sup>13</sup>C{<sup>1</sup>H} NMR (DMSO-*d*<sub>6</sub>, 50 MHz) δ: 33.4, 55.8, 105.0 (d, *J*=23.6 Hz), 105.3, 110.1 (d, *J*=26.2 Hz), 110.6, 111.9 (d, *J*=9.9 Hz), 112.7 (d, *J*=4.8 Hz), 112.8, 112.9, 126.7 (d, *J*=10.2 Hz), 127.3, 131.2, 131.6, 131.8, 133.9, 143.0, 153.8, 155.1, 157.7 (d, *J*=232.6 Hz), 161.3; LC-MS: *m/z* [M + H]<sup>+</sup> calcd for C<sub>21</sub>H<sub>18</sub>FN<sub>6</sub>O<sup>+</sup> 389.14; found, 389.36. *Anal.* Calculated for C<sub>21</sub>H<sub>17</sub>FN<sub>6</sub>O (MW: 388.40) C, 64.94; H, 4.41; N, 21.64%. Found: C, 64.70; H, 4.75; N, 21.55%.

6-(5-Fluoro-1-methyl-1H-indol-3-yl)-5-(5-methoxy-1H-indol-3-yl)-1,2,4-triazin-3-amine (**6ab**). Yield: 32% (overall yield: 71%); yellow solid; m.p.: 227.9 °C; IR (cm<sup>-1</sup>): 3491/3289 (NH<sub>2</sub>), 3180 (NH); <sup>1</sup>H NMR (DMSO-*d*<sub>6</sub>, 200 MHz) δ: 3.47 (s, 3H), 3.53 (s, 3H), 6.62 (d, 1H, *J*=2.1 Hz), 6.77 (dd, 1H, *J*=8.7, 2.4 Hz), 6.97 (s, 2H), 7.05-7.13 (m, 2H), 7.38 (d, 1H, *J*=8.8 Hz), 7.47 (dd, 1H, *J*=8.9, 4.6 Hz), 7.54 (d, 1H, *J*=2.5 Hz), 8.27 (dd, 1H, *J*=10.6, 2.5 Hz), 11.31 (s, 1H); <sup>13</sup>C{<sup>1</sup>H} NMR (DMSO-*d*<sub>6</sub>, 50 MHz) δ: 33.8, 55.5, 101.6, 108.3 (d, *J*=25.0 Hz), 110.2 (d, *J*=4.6 Hz), 111.0 (d, *J*=26.2 Hz), 112.0 (d, *J*=10.0 Hz), 112.3, 112.5, 113.0, 126.3, 126.5, 127.7 (d, *J*=11.1 Hz), 131.7, 134.0, 135.9, 143.8, 152.9, 153.9, 158.7 (d, *J*=233.1 Hz), 161.3; LC-MS: *m/z* [M + H]<sup>+</sup> calcd for C<sub>21</sub>H<sub>18</sub>FN<sub>6</sub>O<sup>+</sup> 389.14; found, 389.44. *Anal.* Calculated for C<sub>21</sub>H<sub>17</sub>FN<sub>6</sub>O (MW: 388.40) C, 64.94; H, 4.41; N, 21.64%. Found: C, 64.73; H, 4.65; N, 21.72%.

**Table S1.** 3-Amino-1,2,4-triazine derivatives **5,6** and their relative yields.

| Cpd       | R                | R <sup>1</sup>  | R <sup>2</sup>   | R <sup>3</sup>  | Overall yield (%) | 5(%)<br>6(%) | Cpd        | R                | R <sup>1</sup> | R <sup>2</sup>   | R <sup>3</sup>  | Overall yield (%) | 5(%)<br>6(%) |
|-----------|------------------|-----------------|------------------|-----------------|-------------------|--------------|------------|------------------|----------------|------------------|-----------------|-------------------|--------------|
| <b>5a</b> | H                | H               | H                | H               | 55%               | -            | <b>5q</b>  | Br               | H              | H                | CH <sub>3</sub> | 74%               | 40%          |
| <b>5b</b> | OCH <sub>3</sub> | H               | OCH <sub>3</sub> | H               | 78%               | -            | <b>6q</b>  | Br               | H              | H                | CH <sub>3</sub> | 74%               | 34%          |
| <b>5c</b> | F                | H               | F                | H               | 61%               | -            | <b>5r</b>  | Br               | H              | Br               | CH <sub>3</sub> | 90%               | 42%          |
| <b>5d</b> | Br               | H               | Br               | H               | 70%               | -            | <b>6r</b>  | Br               | H              | Br               | CH <sub>3</sub> | 90%               | 48%          |
| <b>5e</b> | H                | CH <sub>3</sub> | H                | CH <sub>3</sub> | 85%               | -            | <b>5s</b>  | Br               | H              | OCH <sub>3</sub> | CH <sub>3</sub> | 78%               | 40%          |
| <b>5f</b> | OCH <sub>3</sub> | CH <sub>3</sub> | OCH <sub>3</sub> | CH <sub>3</sub> | 98%               | -            | <b>6s</b>  | Br               | H              | OCH <sub>3</sub> | CH <sub>3</sub> | 78%               | 38%          |
| <b>5g</b> | F                | CH <sub>3</sub> | F                | CH <sub>3</sub> | 77%               | -            | <b>5t</b>  | Br               | H              | F                | CH <sub>3</sub> | 86%               | 44%          |
| <b>5h</b> | H                | CH <sub>3</sub> | OCH <sub>3</sub> | CH <sub>3</sub> | 98%               | 41%          | <b>6t</b>  | Br               | H              | F                | CH <sub>3</sub> | 86%               | 42%          |
| <b>6h</b> | H                | CH <sub>3</sub> | OCH <sub>3</sub> | CH <sub>3</sub> | 98%               | 57%          | <b>5u</b>  | F                | H              | F                | CH <sub>3</sub> | 79%               | 37%          |
| <b>5i</b> | H                | CH <sub>3</sub> | F                | CH <sub>3</sub> | 73%               | 34%          | <b>6u</b>  | F                | H              | F                | CH <sub>3</sub> | 79%               | 42%          |
| <b>6i</b> | H                | CH <sub>3</sub> | F                | CH <sub>3</sub> | 73%               | 39%          | <b>5v</b>  | F                | H              | H                | CH <sub>3</sub> | 84%               | 38%          |
| <b>5j</b> | H                | CH <sub>3</sub> | Br               | CH <sub>3</sub> | 97%               | 62%          | <b>6v</b>  | F                | H              | H                | CH <sub>3</sub> | 84%               | 46%          |
| <b>6j</b> | H                | CH <sub>3</sub> | Br               | CH <sub>3</sub> | 97%               | 35%          | <b>5w</b>  | F                | H              | OCH <sub>3</sub> | CH <sub>3</sub> | 84%               | 40%          |
| <b>5k</b> | F                | CH <sub>3</sub> | OCH <sub>3</sub> | CH <sub>3</sub> | 96%               | 49%          | <b>6w</b>  | F                | H              | OCH <sub>3</sub> | CH <sub>3</sub> | 84%               | 44%          |
| <b>6k</b> | F                | CH <sub>3</sub> | OCH <sub>3</sub> | CH <sub>3</sub> | 96%               | 47%          | <b>5x</b>  | F                | H              | Br               | CH <sub>3</sub> | 82%               | 43%          |
| <b>5l</b> | Br               | CH <sub>3</sub> | OCH <sub>3</sub> | CH <sub>3</sub> | 94%               | 65%          | <b>6x</b>  | F                | H              | Br               | CH <sub>3</sub> | 82%               | 39%          |
| <b>6l</b> | Br               | CH <sub>3</sub> | OCH <sub>3</sub> | CH <sub>3</sub> | 94%               | 29%          | <b>5y</b>  | OCH <sub>3</sub> | H              | OCH <sub>3</sub> | CH <sub>3</sub> | 68%               | 33%          |
| <b>5m</b> | H                | H               | H                | CH <sub>3</sub> | 94%               | 43%          | <b>6y</b>  | OCH <sub>3</sub> | H              | OCH <sub>3</sub> | CH <sub>3</sub> | 68%               | 35%          |
| <b>6m</b> | H                | H               | H                | CH <sub>3</sub> | 94%               | 51%          | <b>5z</b>  | OCH <sub>3</sub> | H              | H                | CH <sub>3</sub> | 67%               | 35%          |
| <b>5n</b> | H                | H               | F                | CH <sub>3</sub> | 80%               | 42%          | <b>6z</b>  | OCH <sub>3</sub> | H              | H                | CH <sub>3</sub> | 67%               | 32%          |
| <b>6n</b> | H                | H               | F                | CH <sub>3</sub> | 80%               | 38%          | <b>5aa</b> | OCH <sub>3</sub> | H              | Br               | CH <sub>3</sub> | 78%               | 37%          |
| <b>5o</b> | H                | H               | Br               | CH <sub>3</sub> | 91%               | 60%          | <b>6aa</b> | OCH <sub>3</sub> | H              | Br               | CH <sub>3</sub> | 78%               | 41%          |
| <b>6o</b> | H                | H               | Br               | CH <sub>3</sub> | 91%               | 31%          | <b>5ab</b> | OCH <sub>3</sub> | H              | F                | CH <sub>3</sub> | 71%               | 39%          |
| <b>5p</b> | H                | H               | OCH <sub>3</sub> | CH <sub>3</sub> | 81%               | 47%          | <b>6ab</b> | OCH <sub>3</sub> | H              | F                | CH <sub>3</sub> | 71%               | 32%          |
| <b>6p</b> | H                | H               | OCH <sub>3</sub> | CH <sub>3</sub> | 81%               | 34%          |            |                  |                |                  |                 |                   |              |

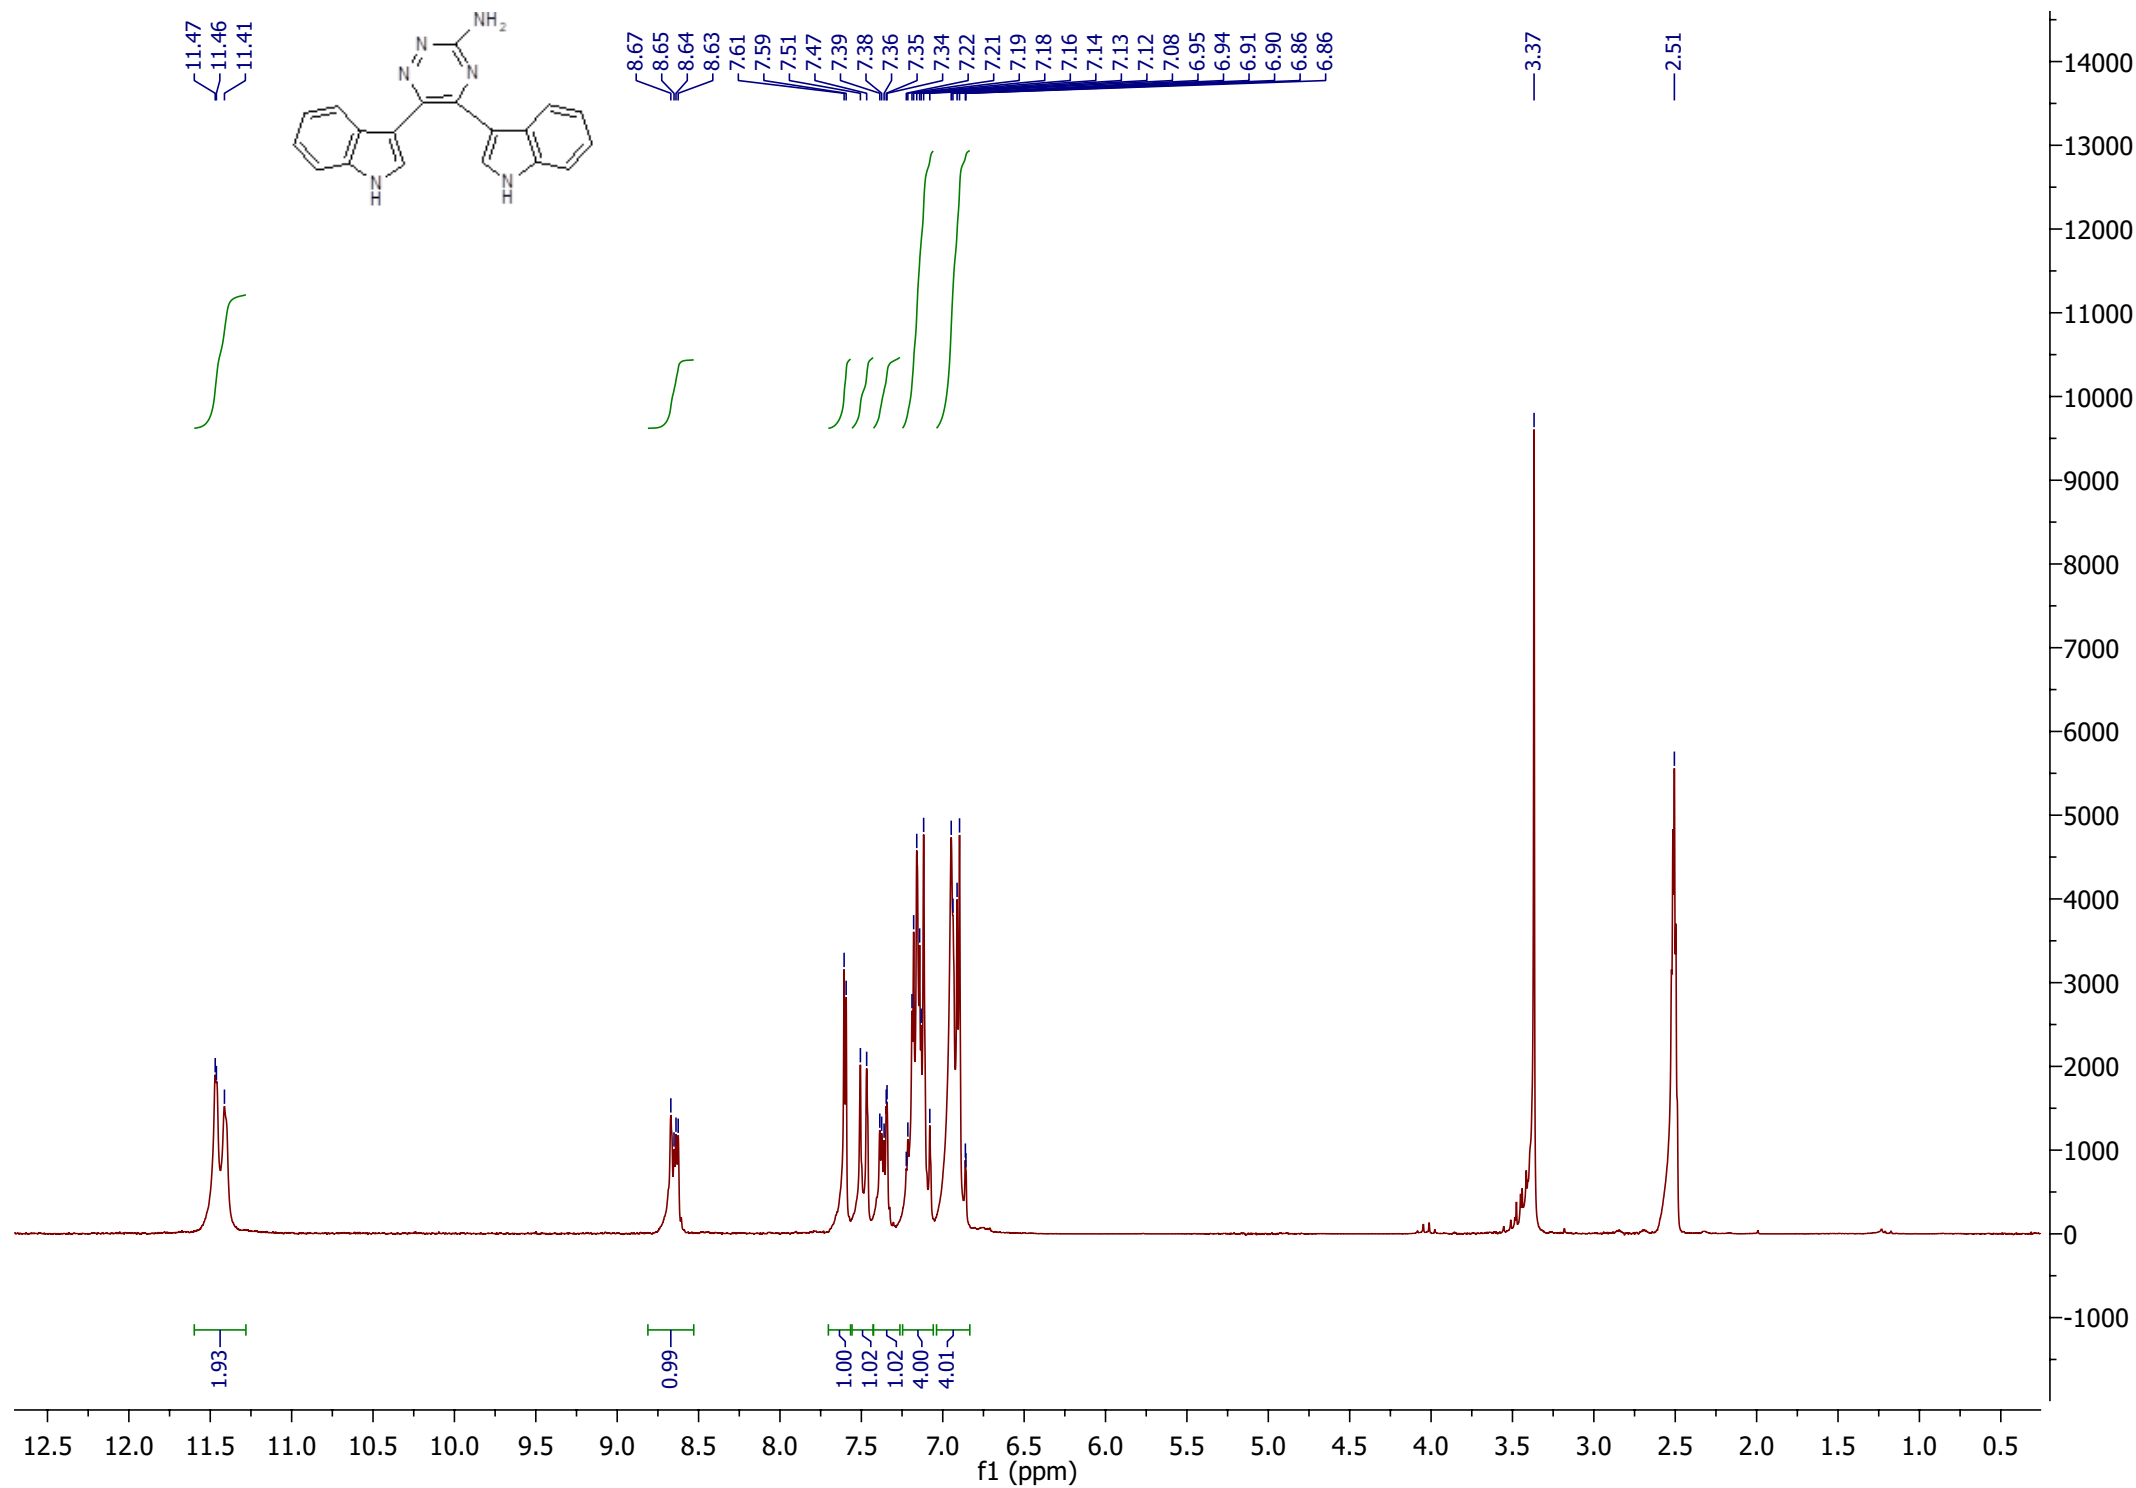

Figure S1:  $^1\text{H}$  NMR spectrum of compound **5a**

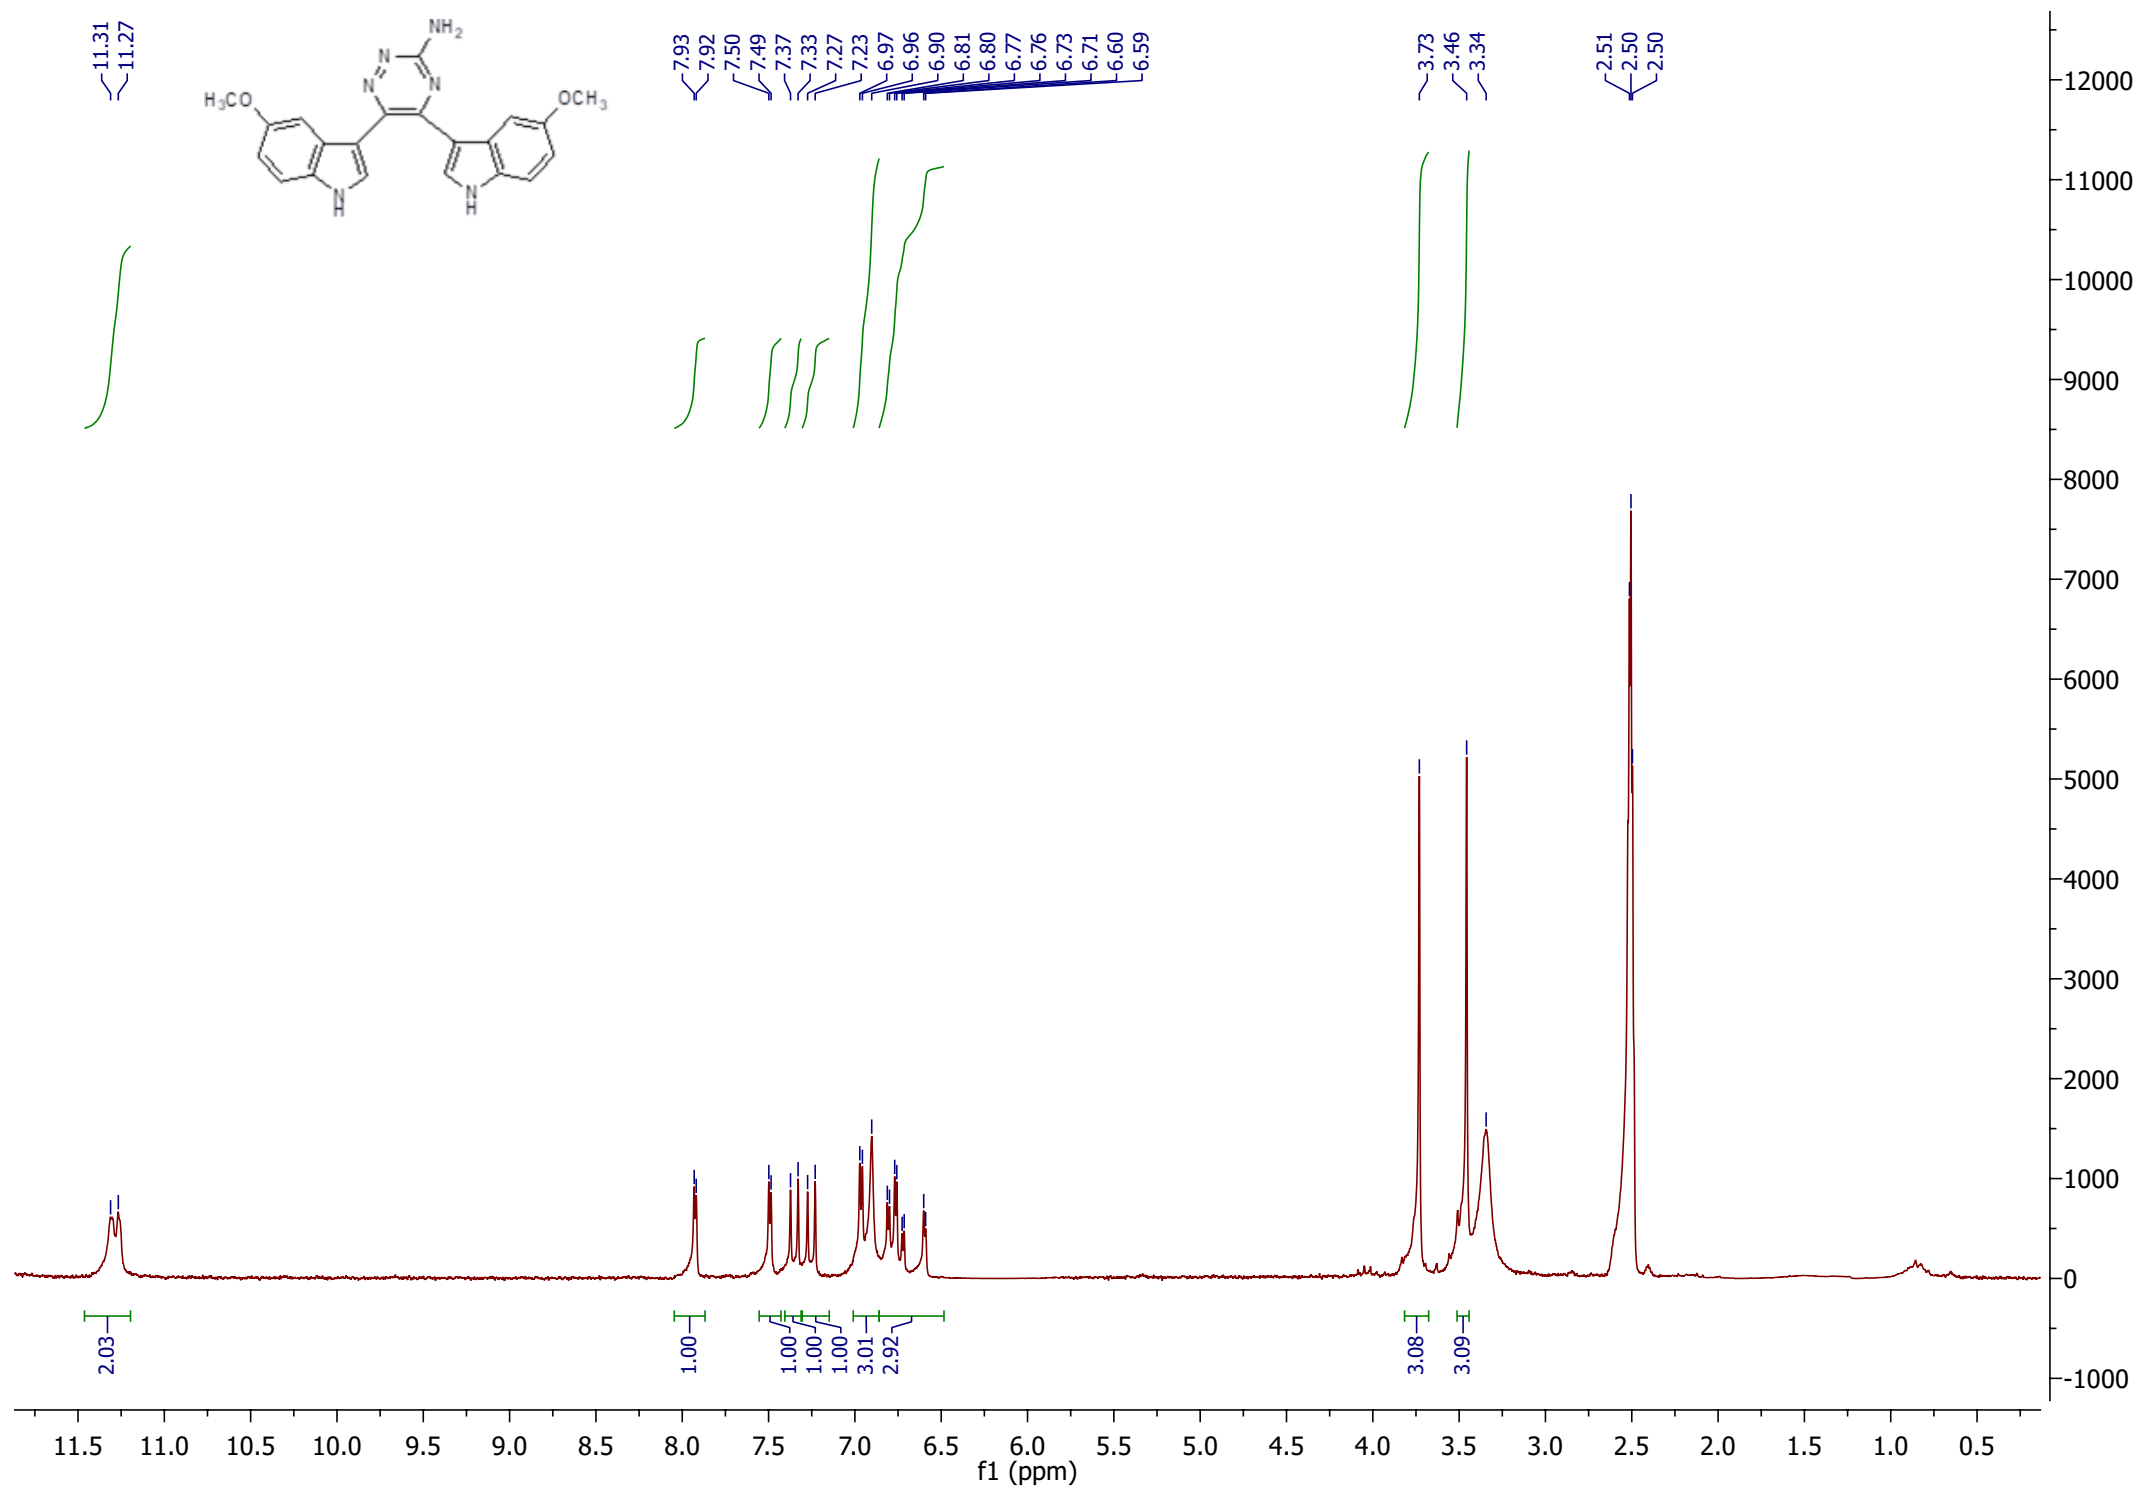

**Figure S2:**  $^1\text{H}$  NMR spectrum of compound **5b**



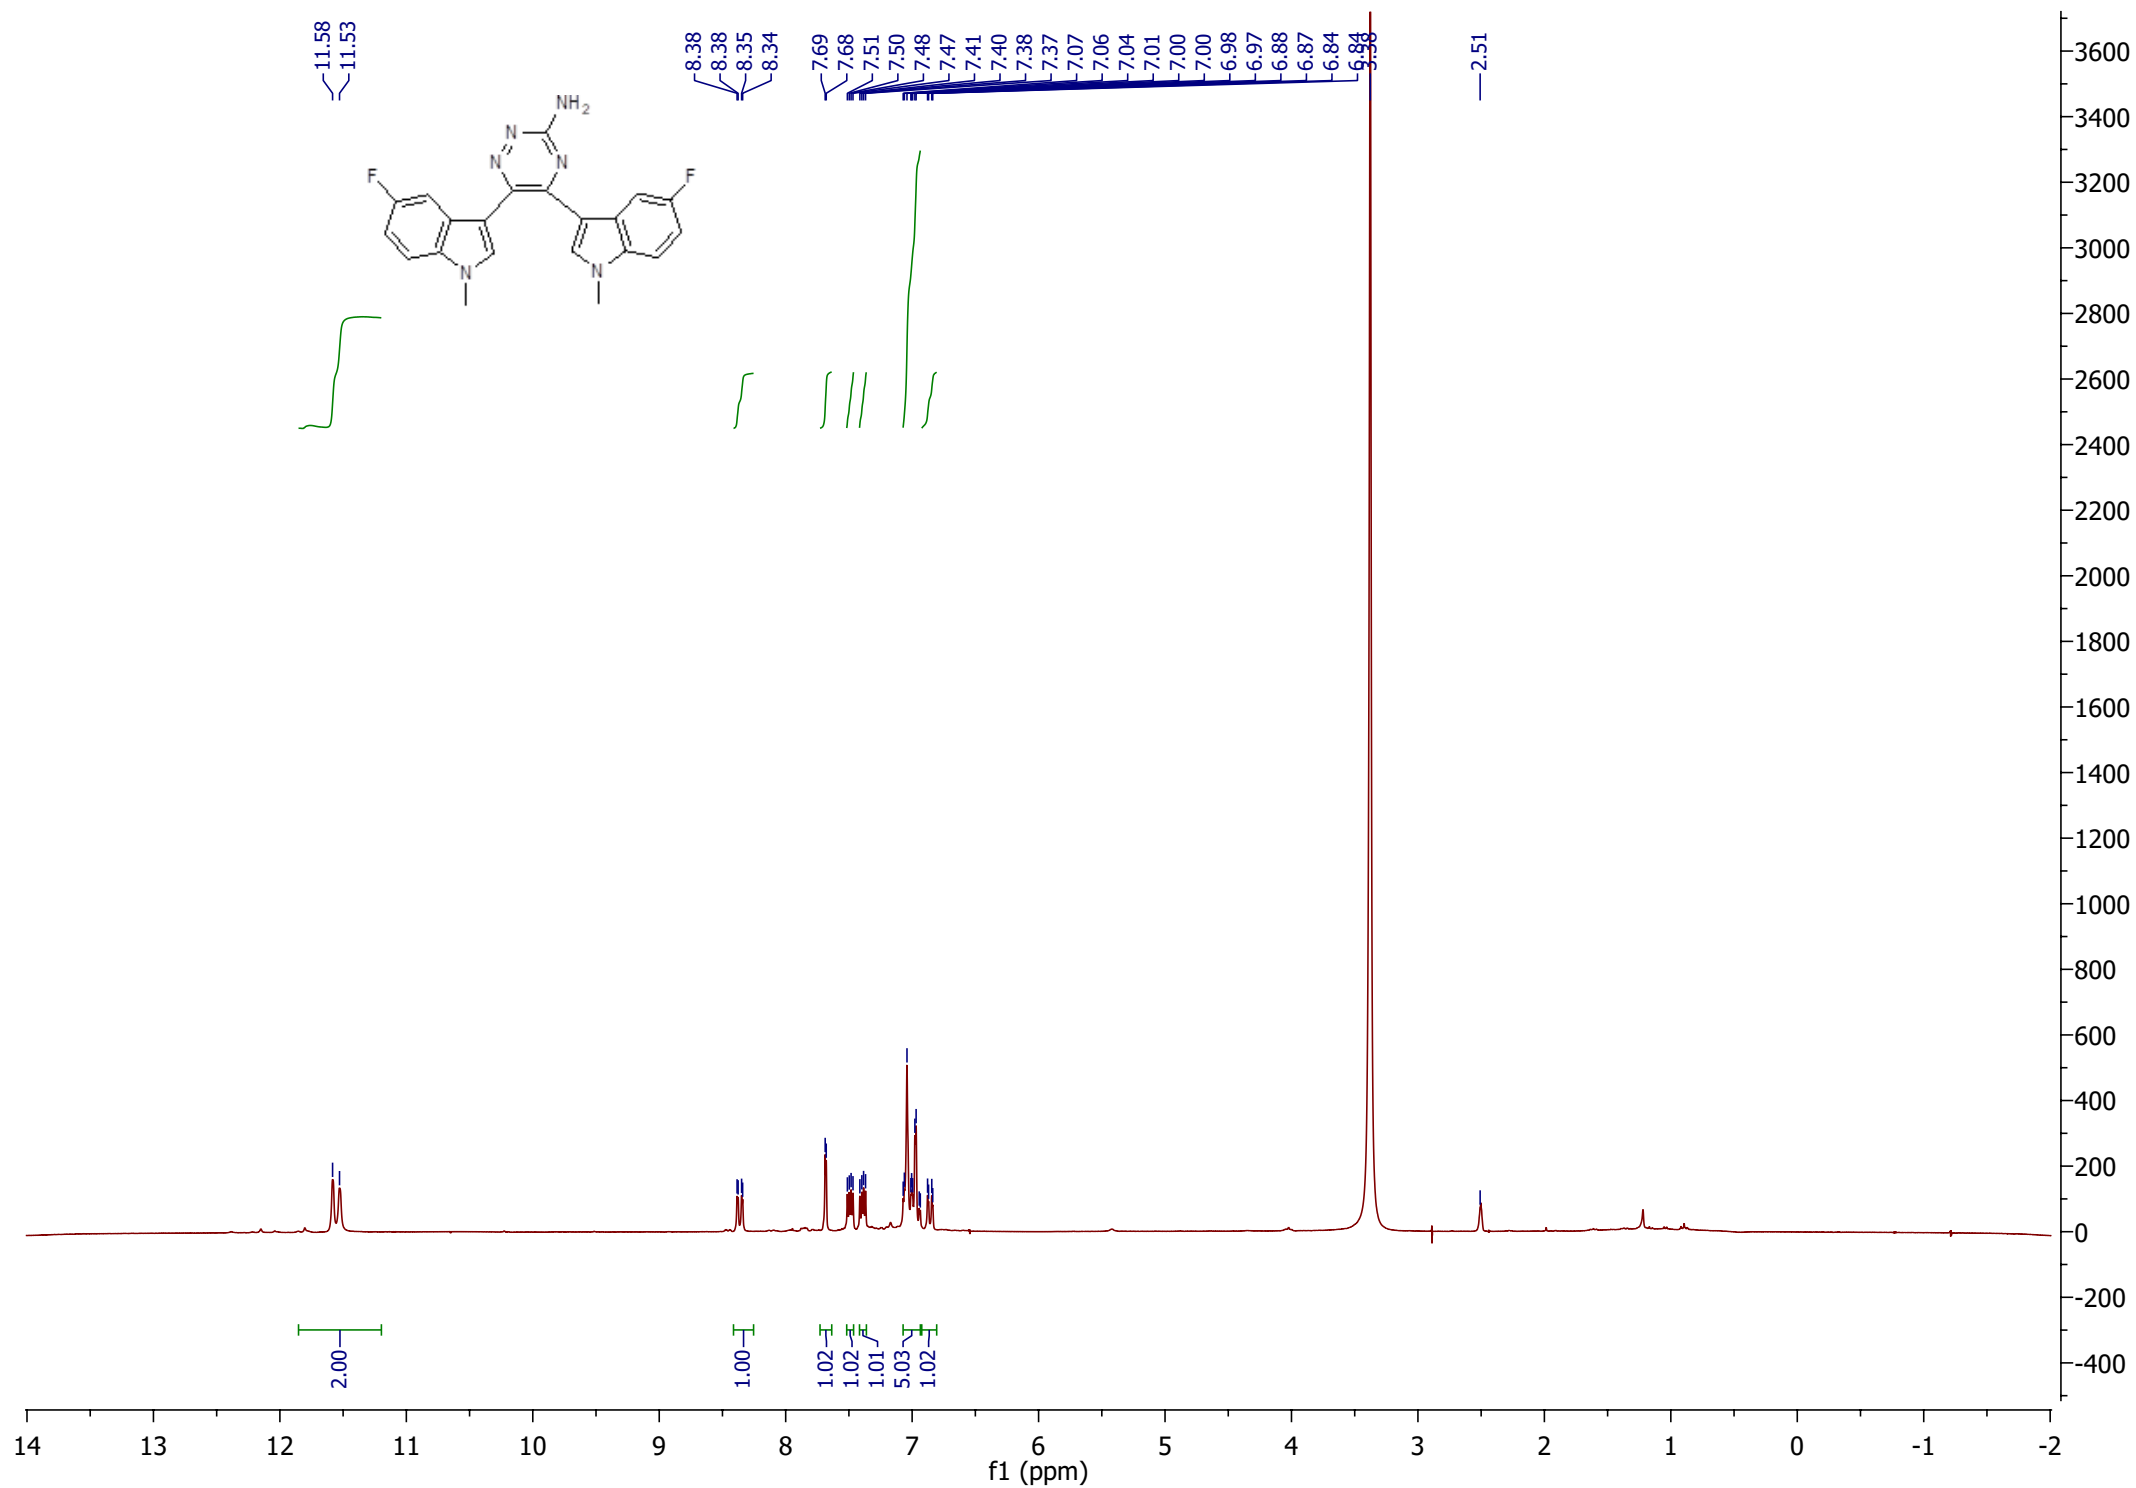

**Figure S3:** <sup>1</sup>H NMR spectrum of compound **5c**

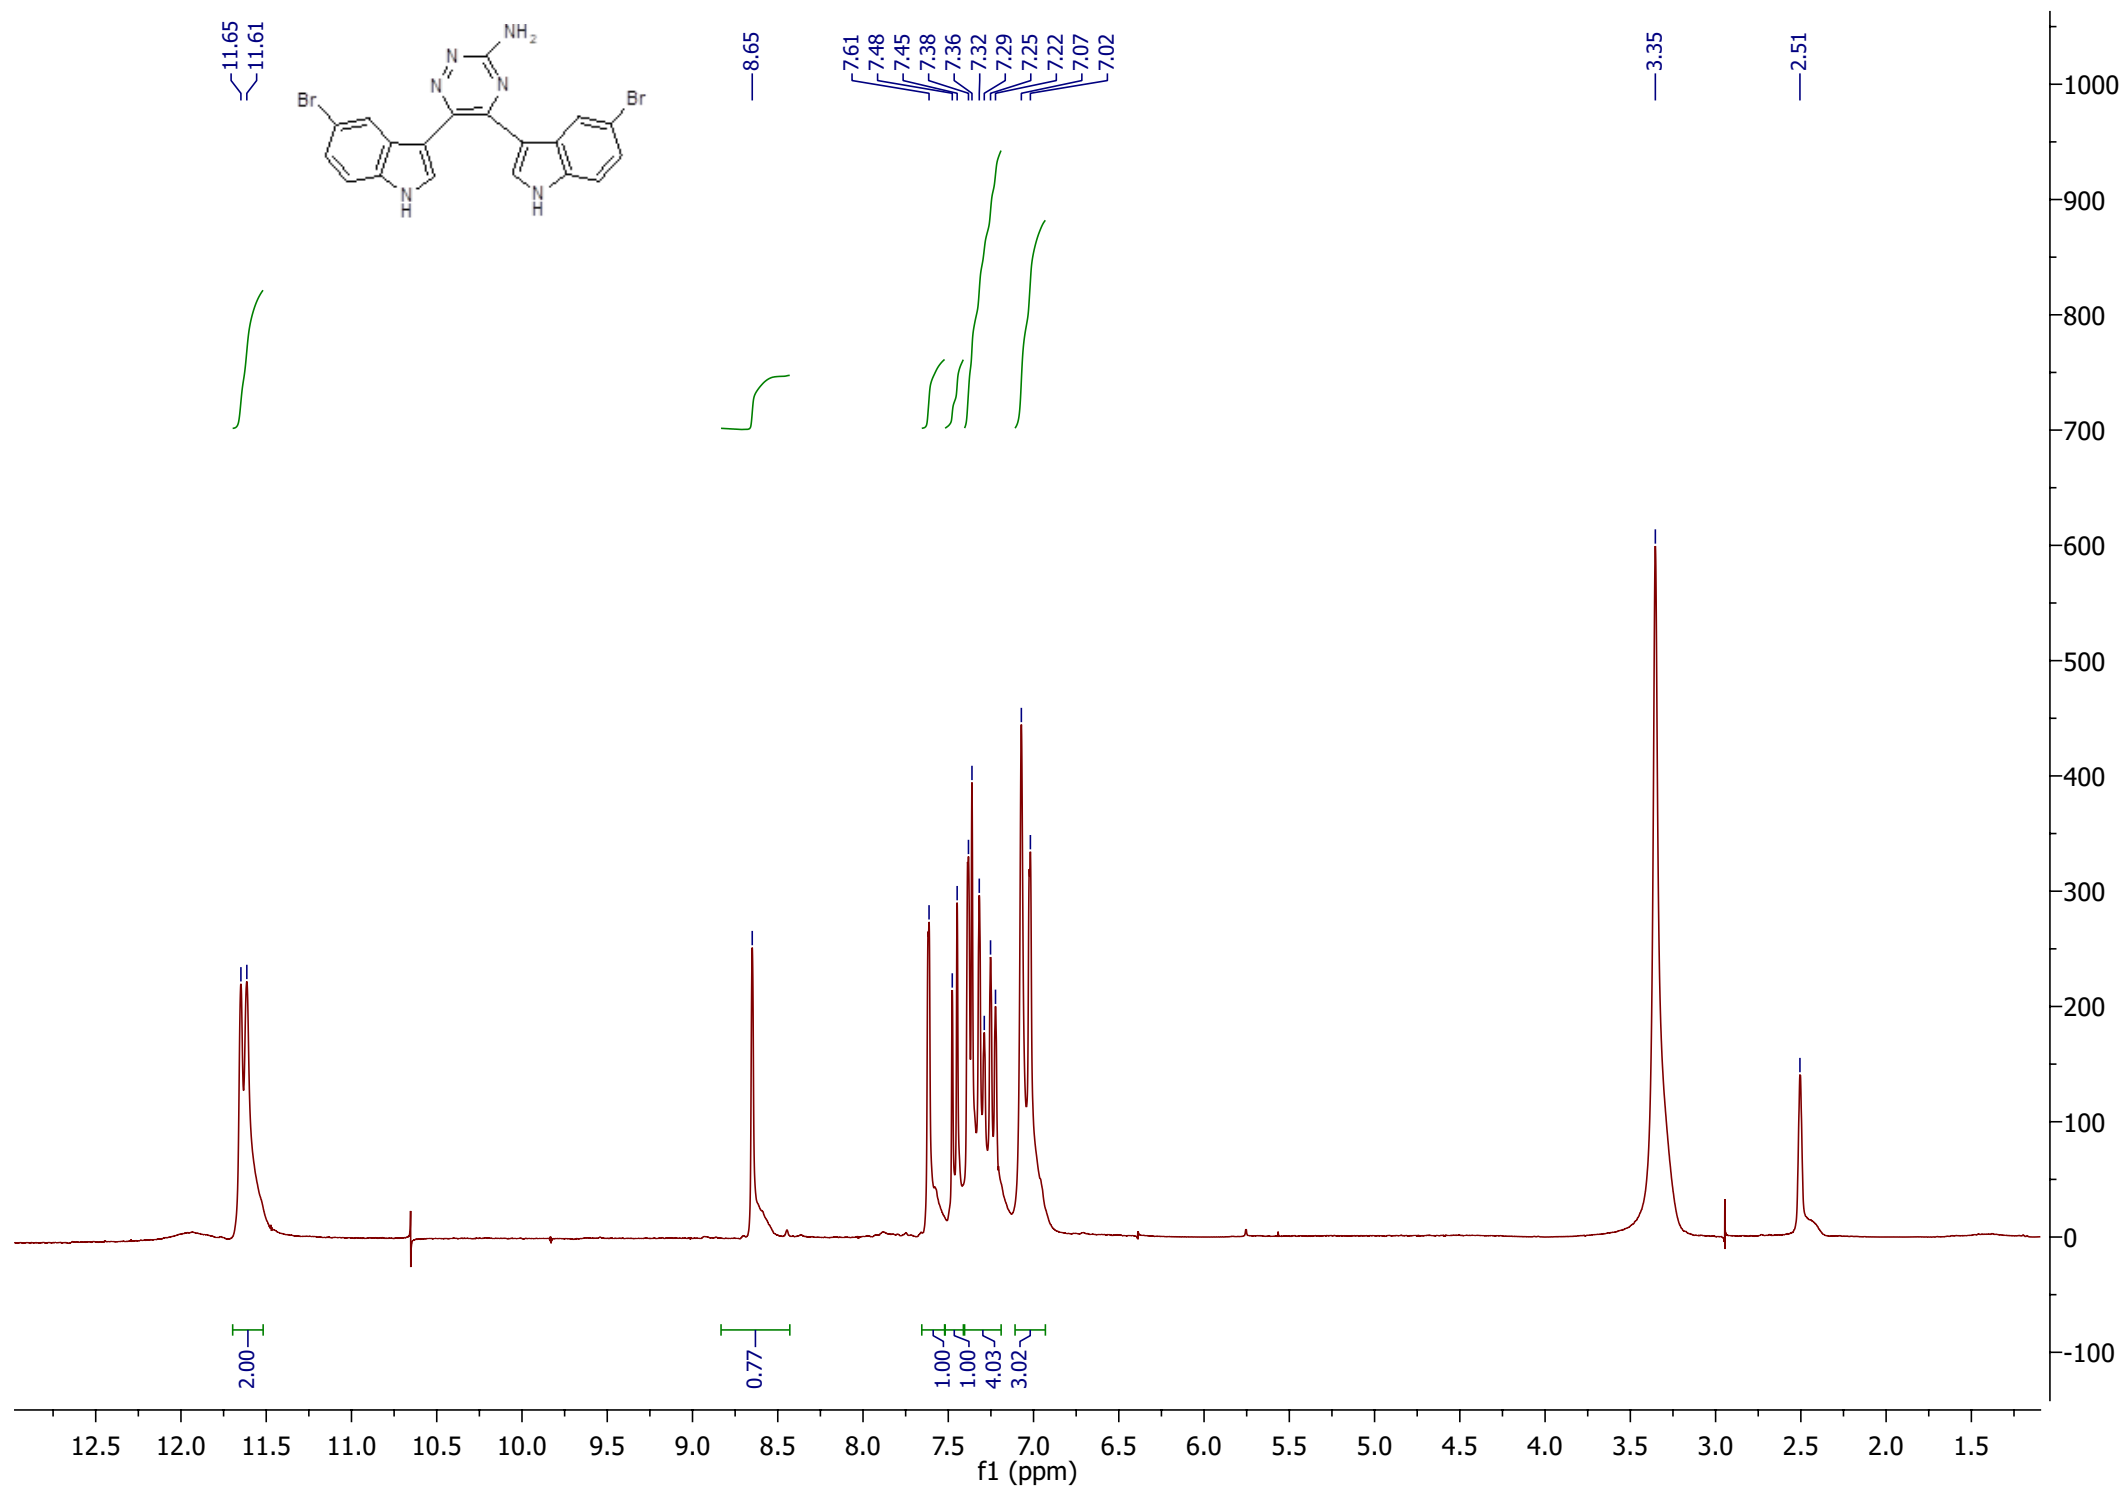

**Figure S4:** <sup>1</sup>H NMR spectrum of compound **5d**

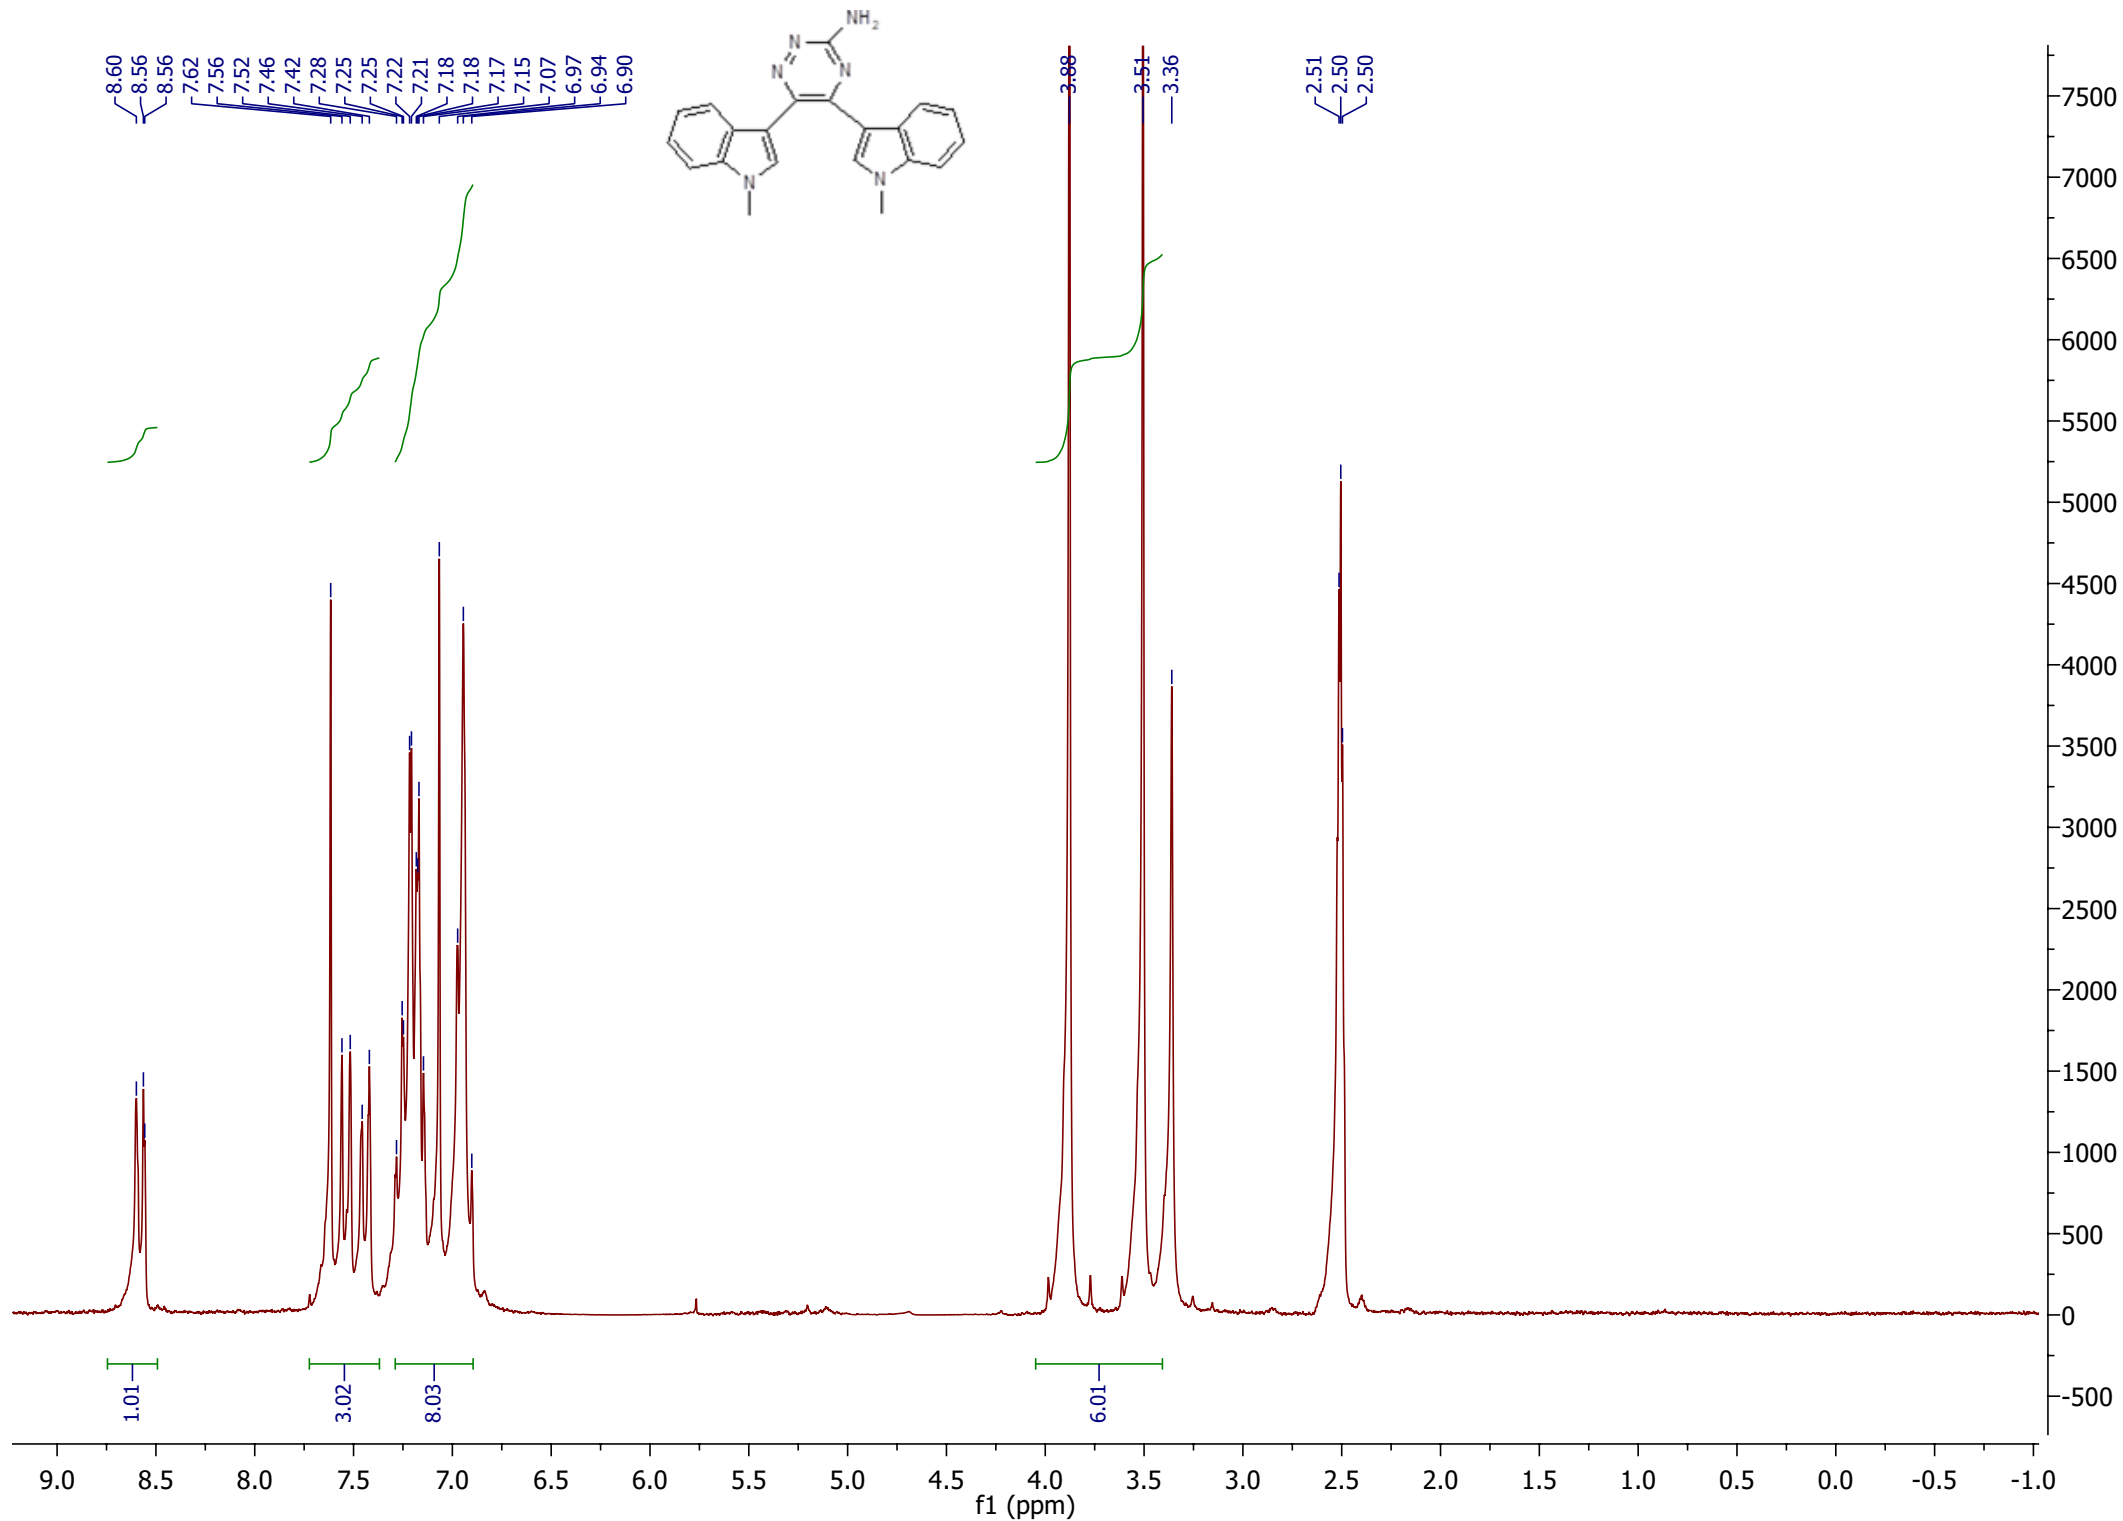

**Figure S5:**  $^1\text{H}$  NMR spectra of compound **5e**

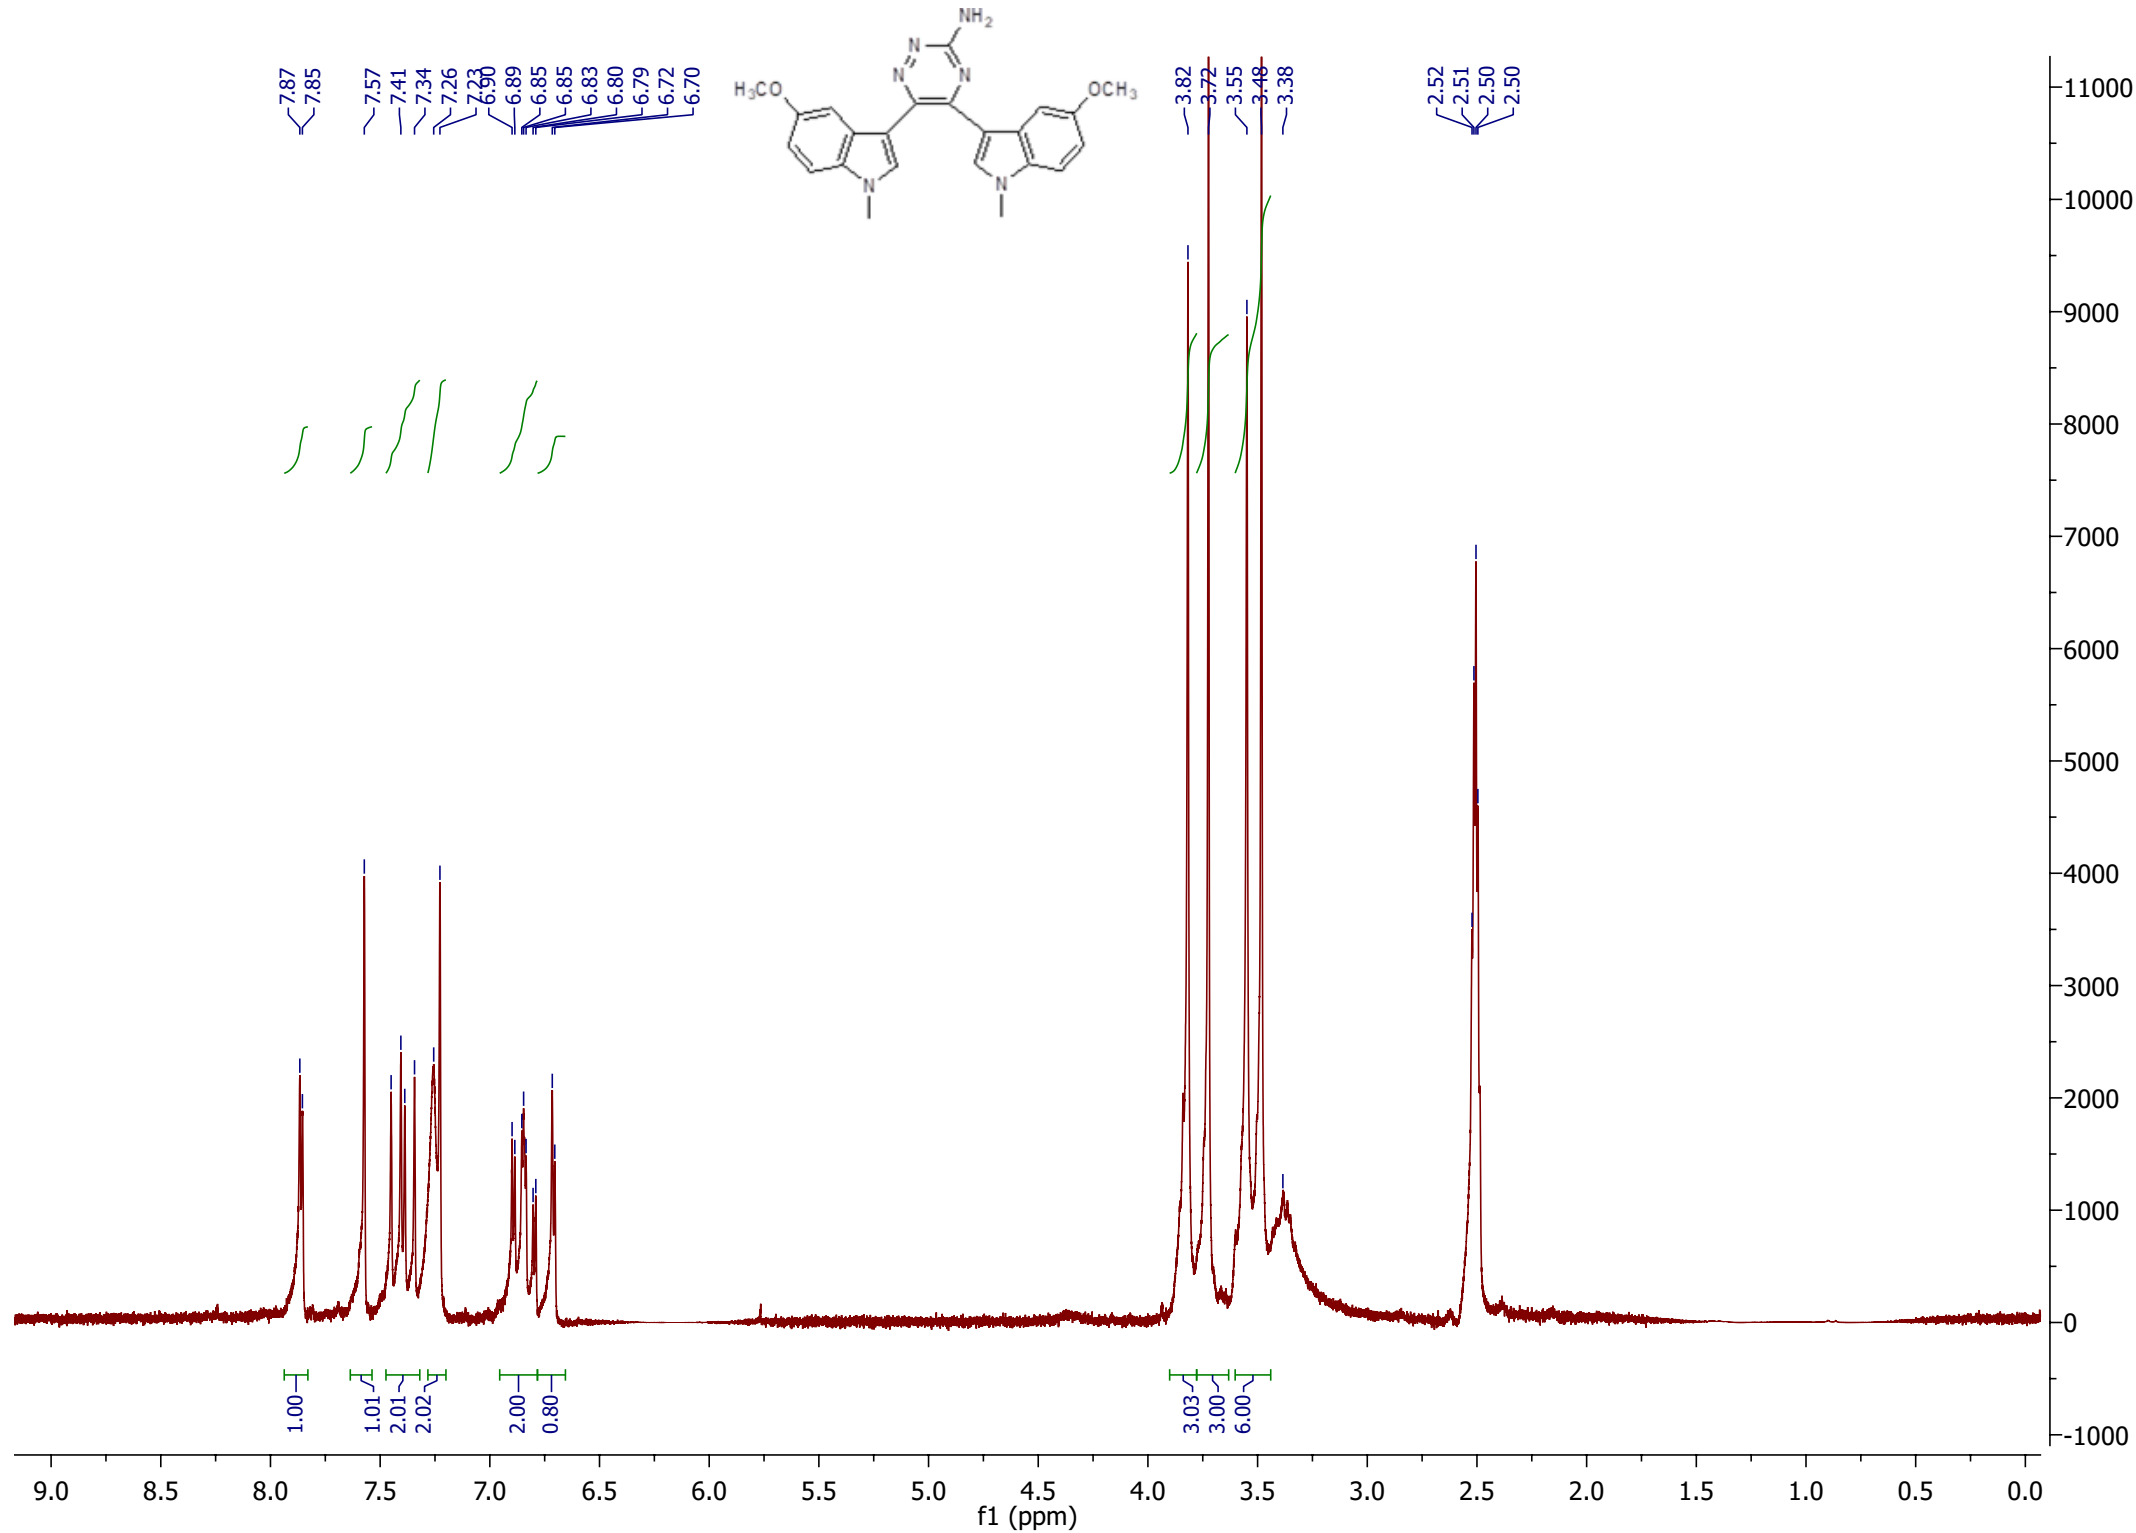

**Figure S6:** <sup>1</sup>H NMR spectrum of compound **5f**

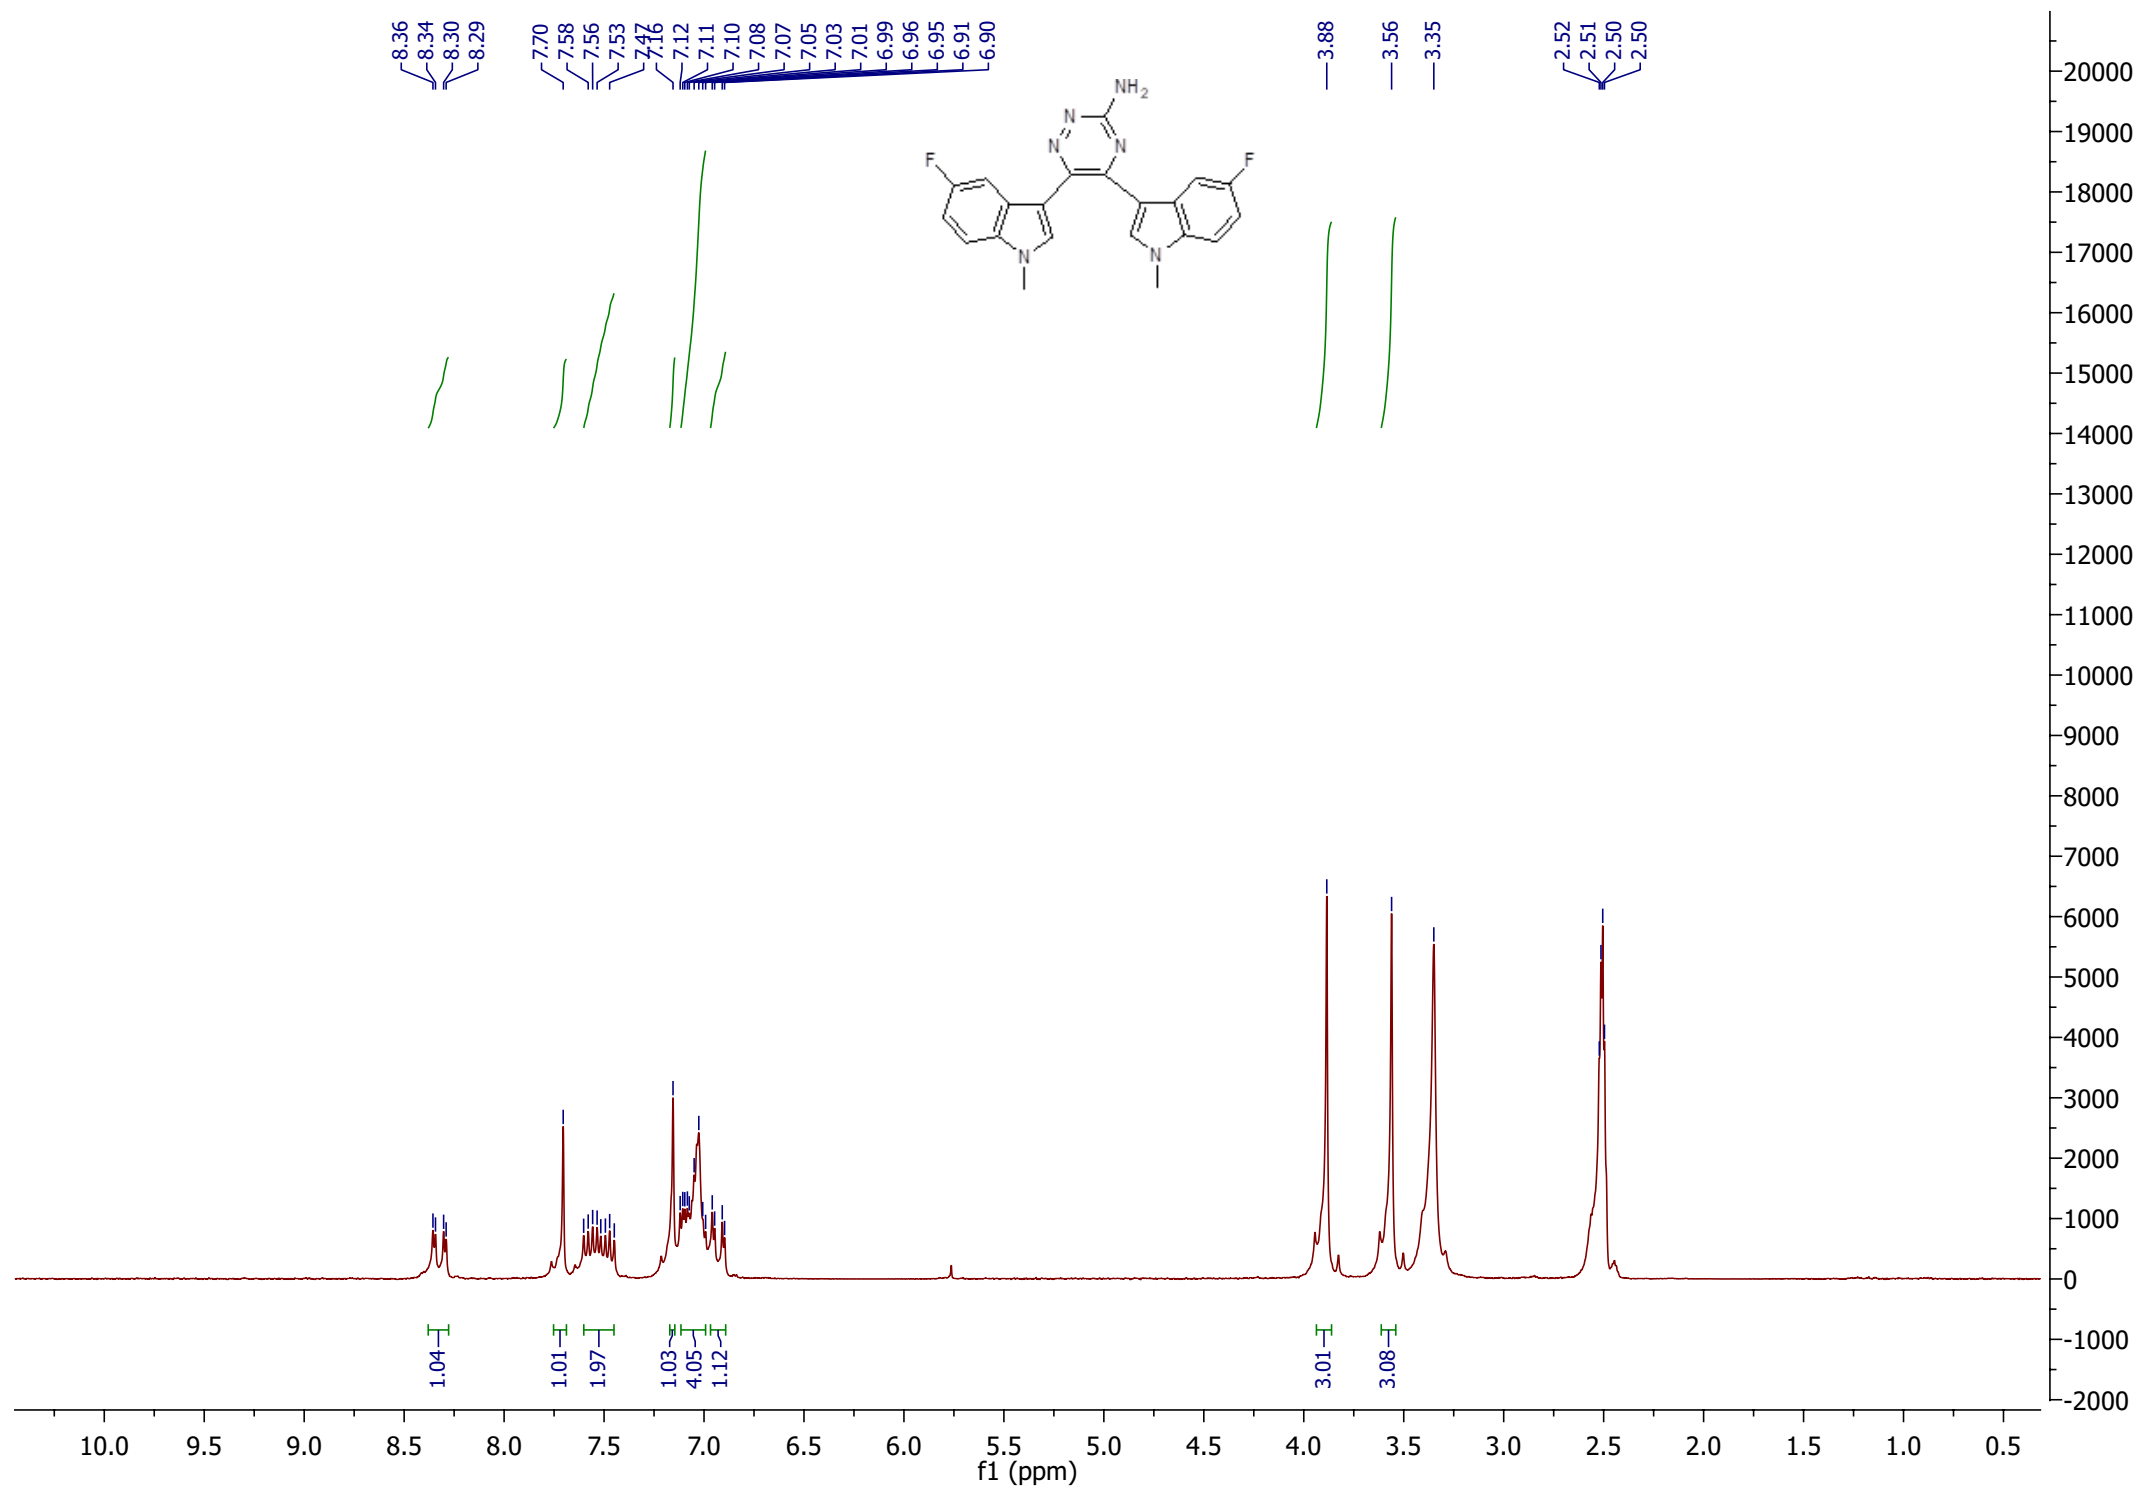

**Figure S7:** <sup>1</sup>H NMR spectrum of compound **5g**

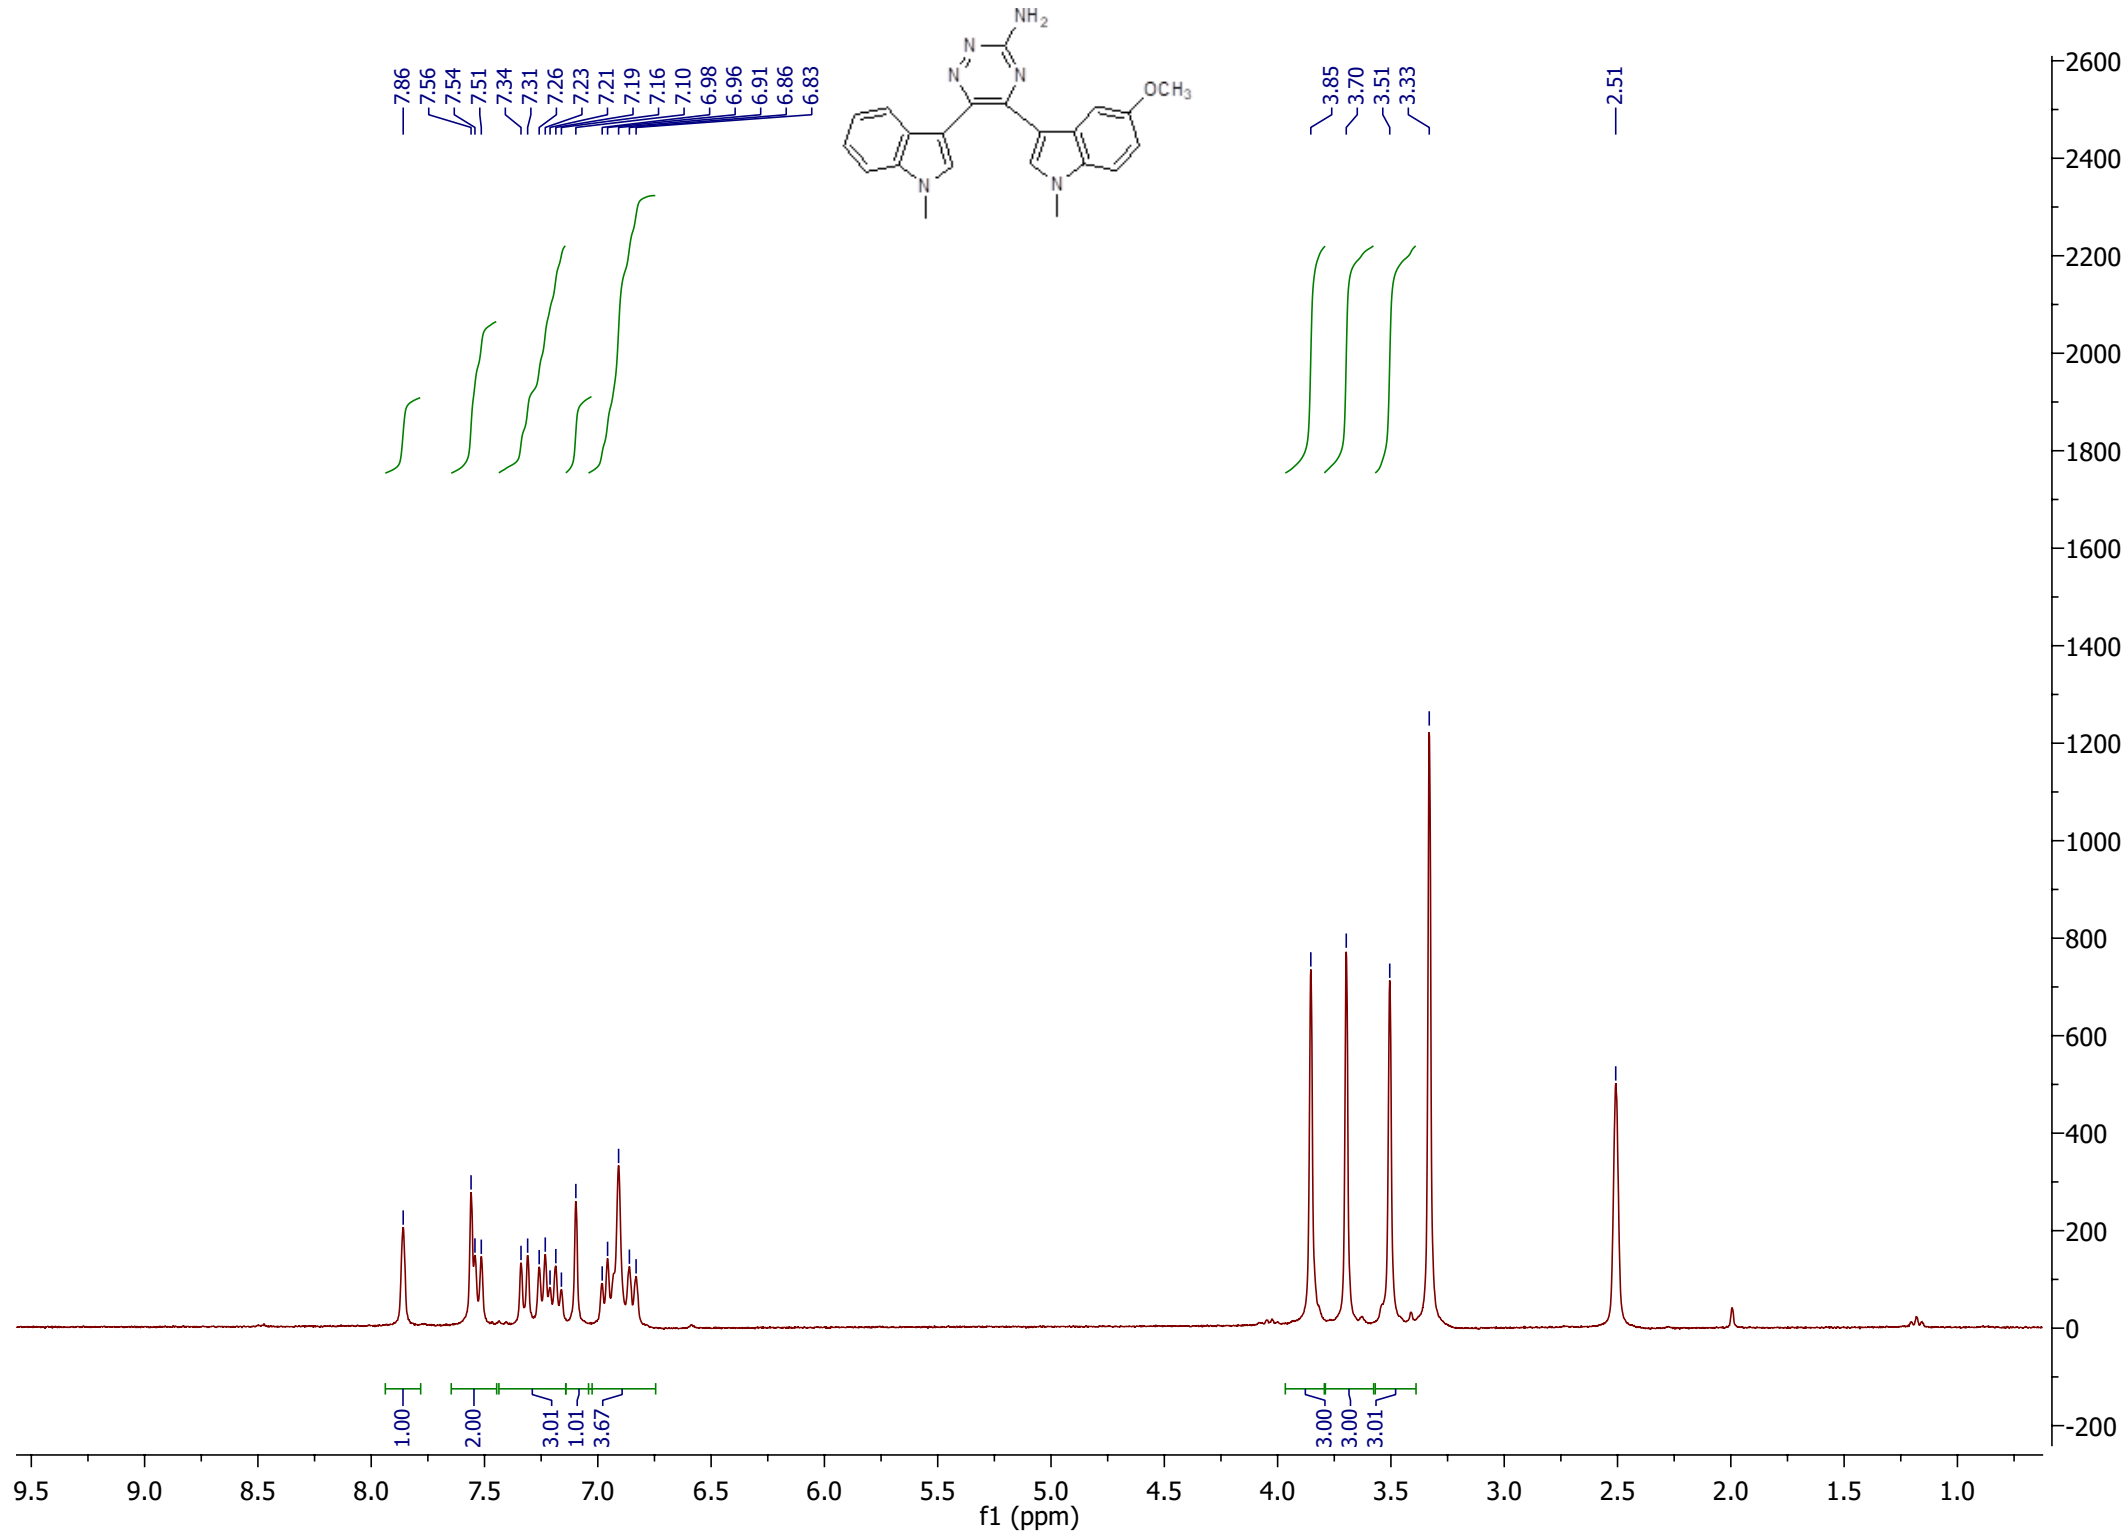

Figure S8: <sup>1</sup>H NMR spectrum of compound 5h

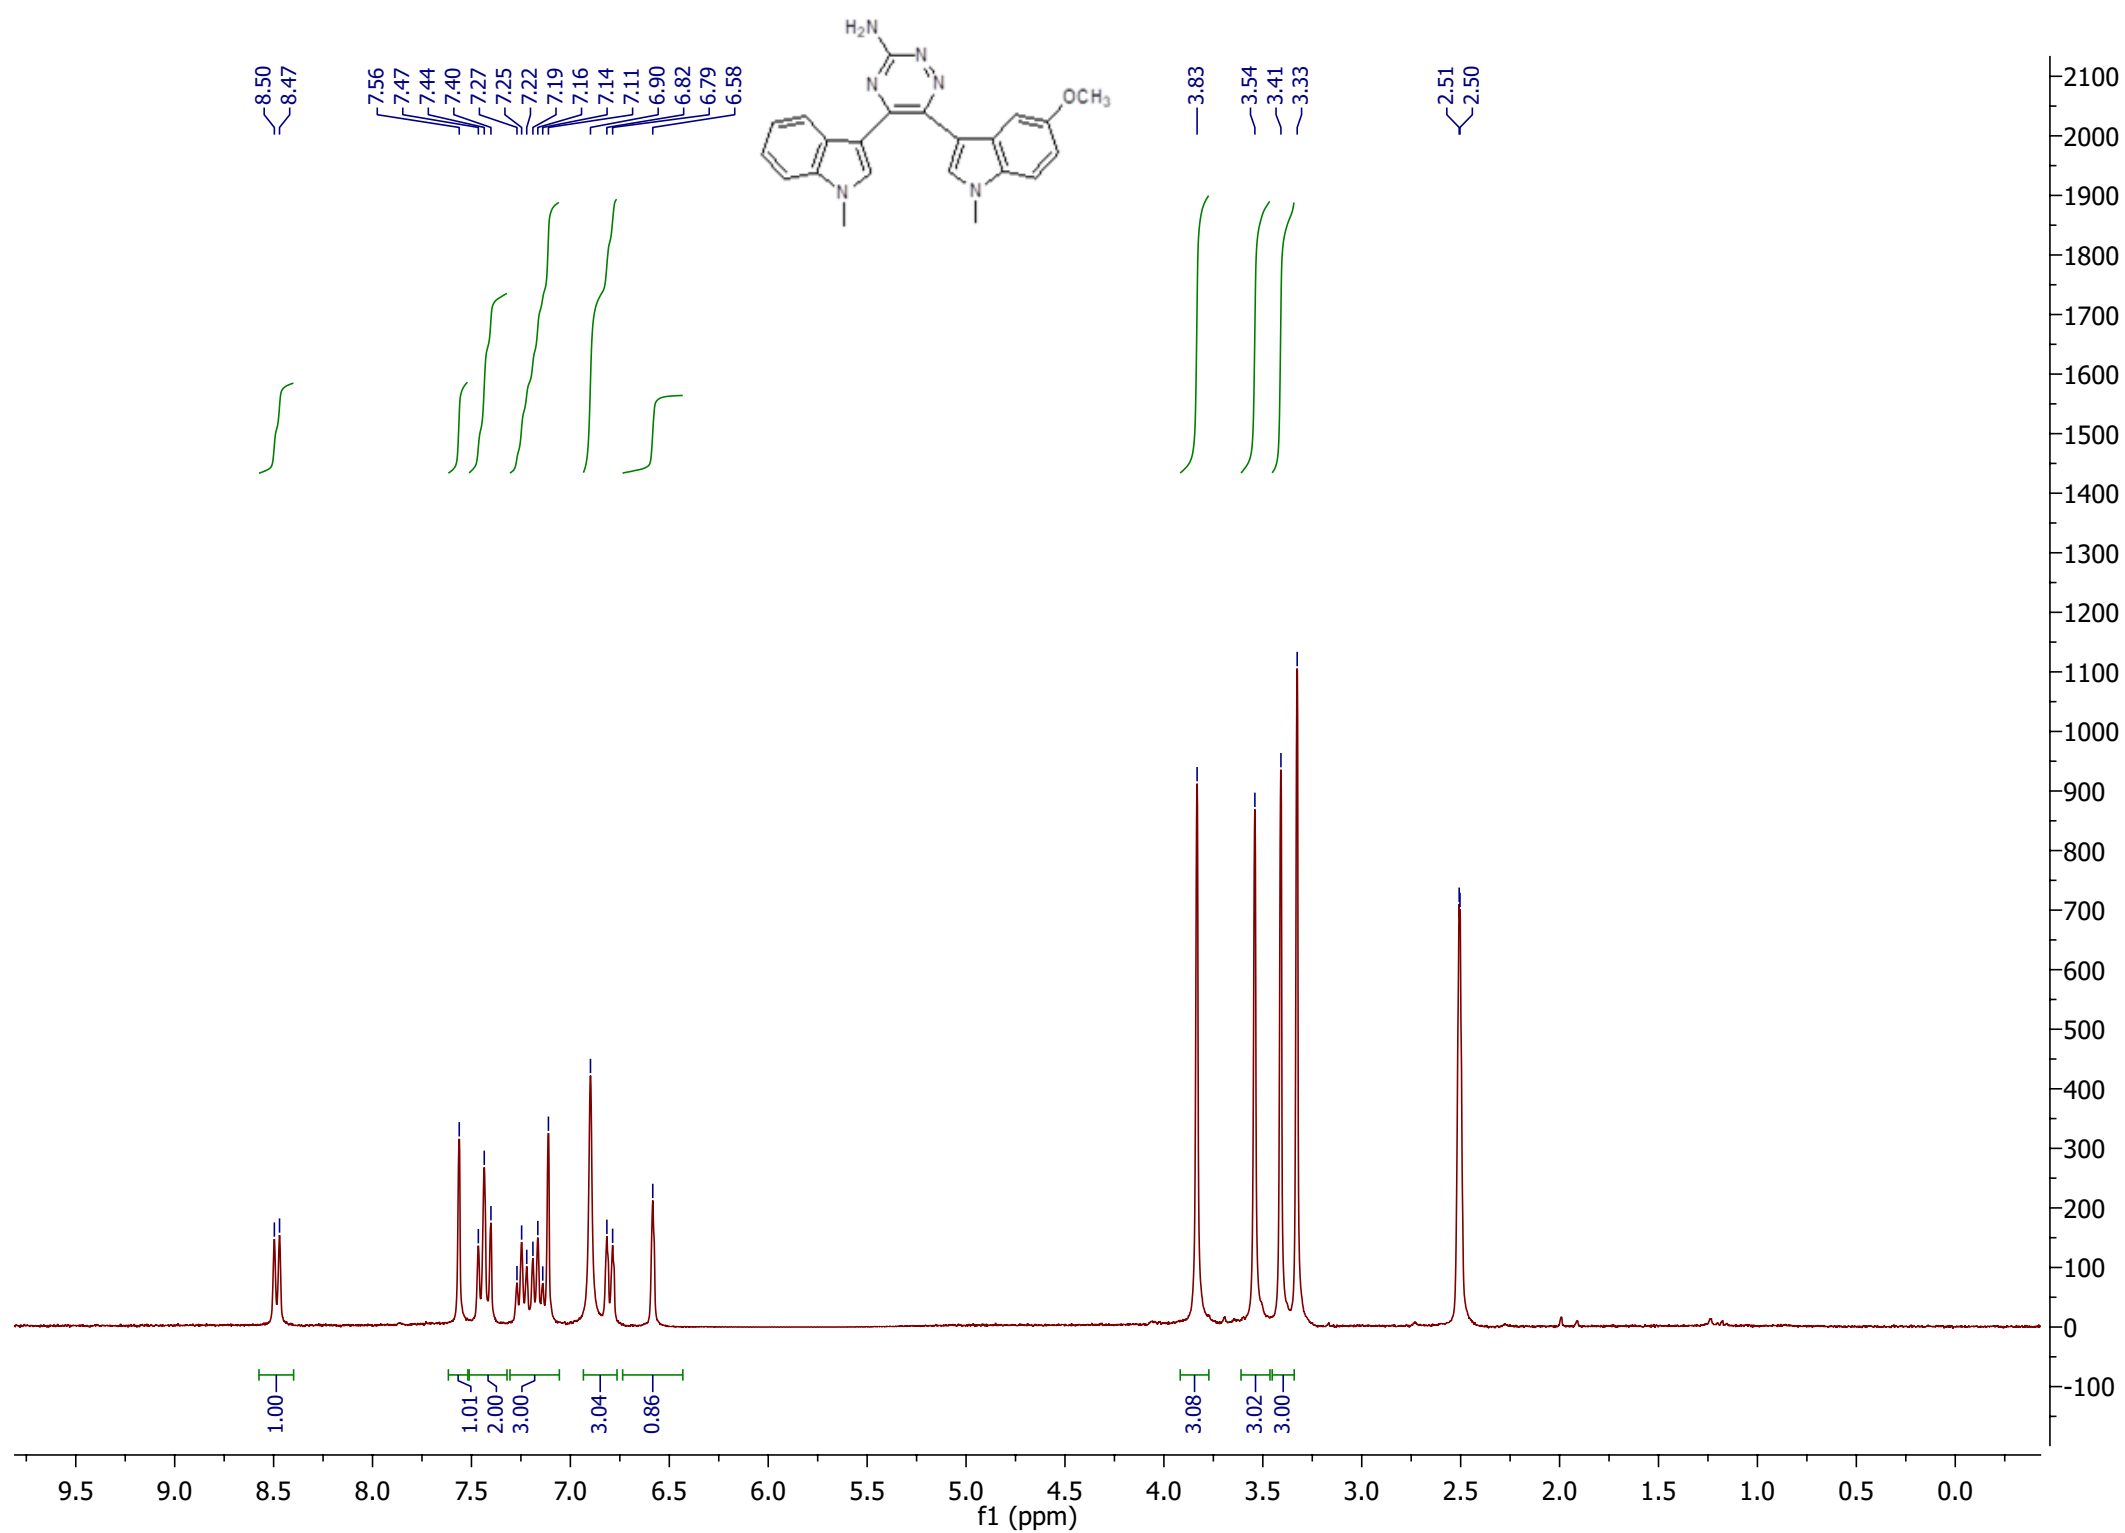

Figure S9: <sup>1</sup>H NMR spectrum of compound **6h**

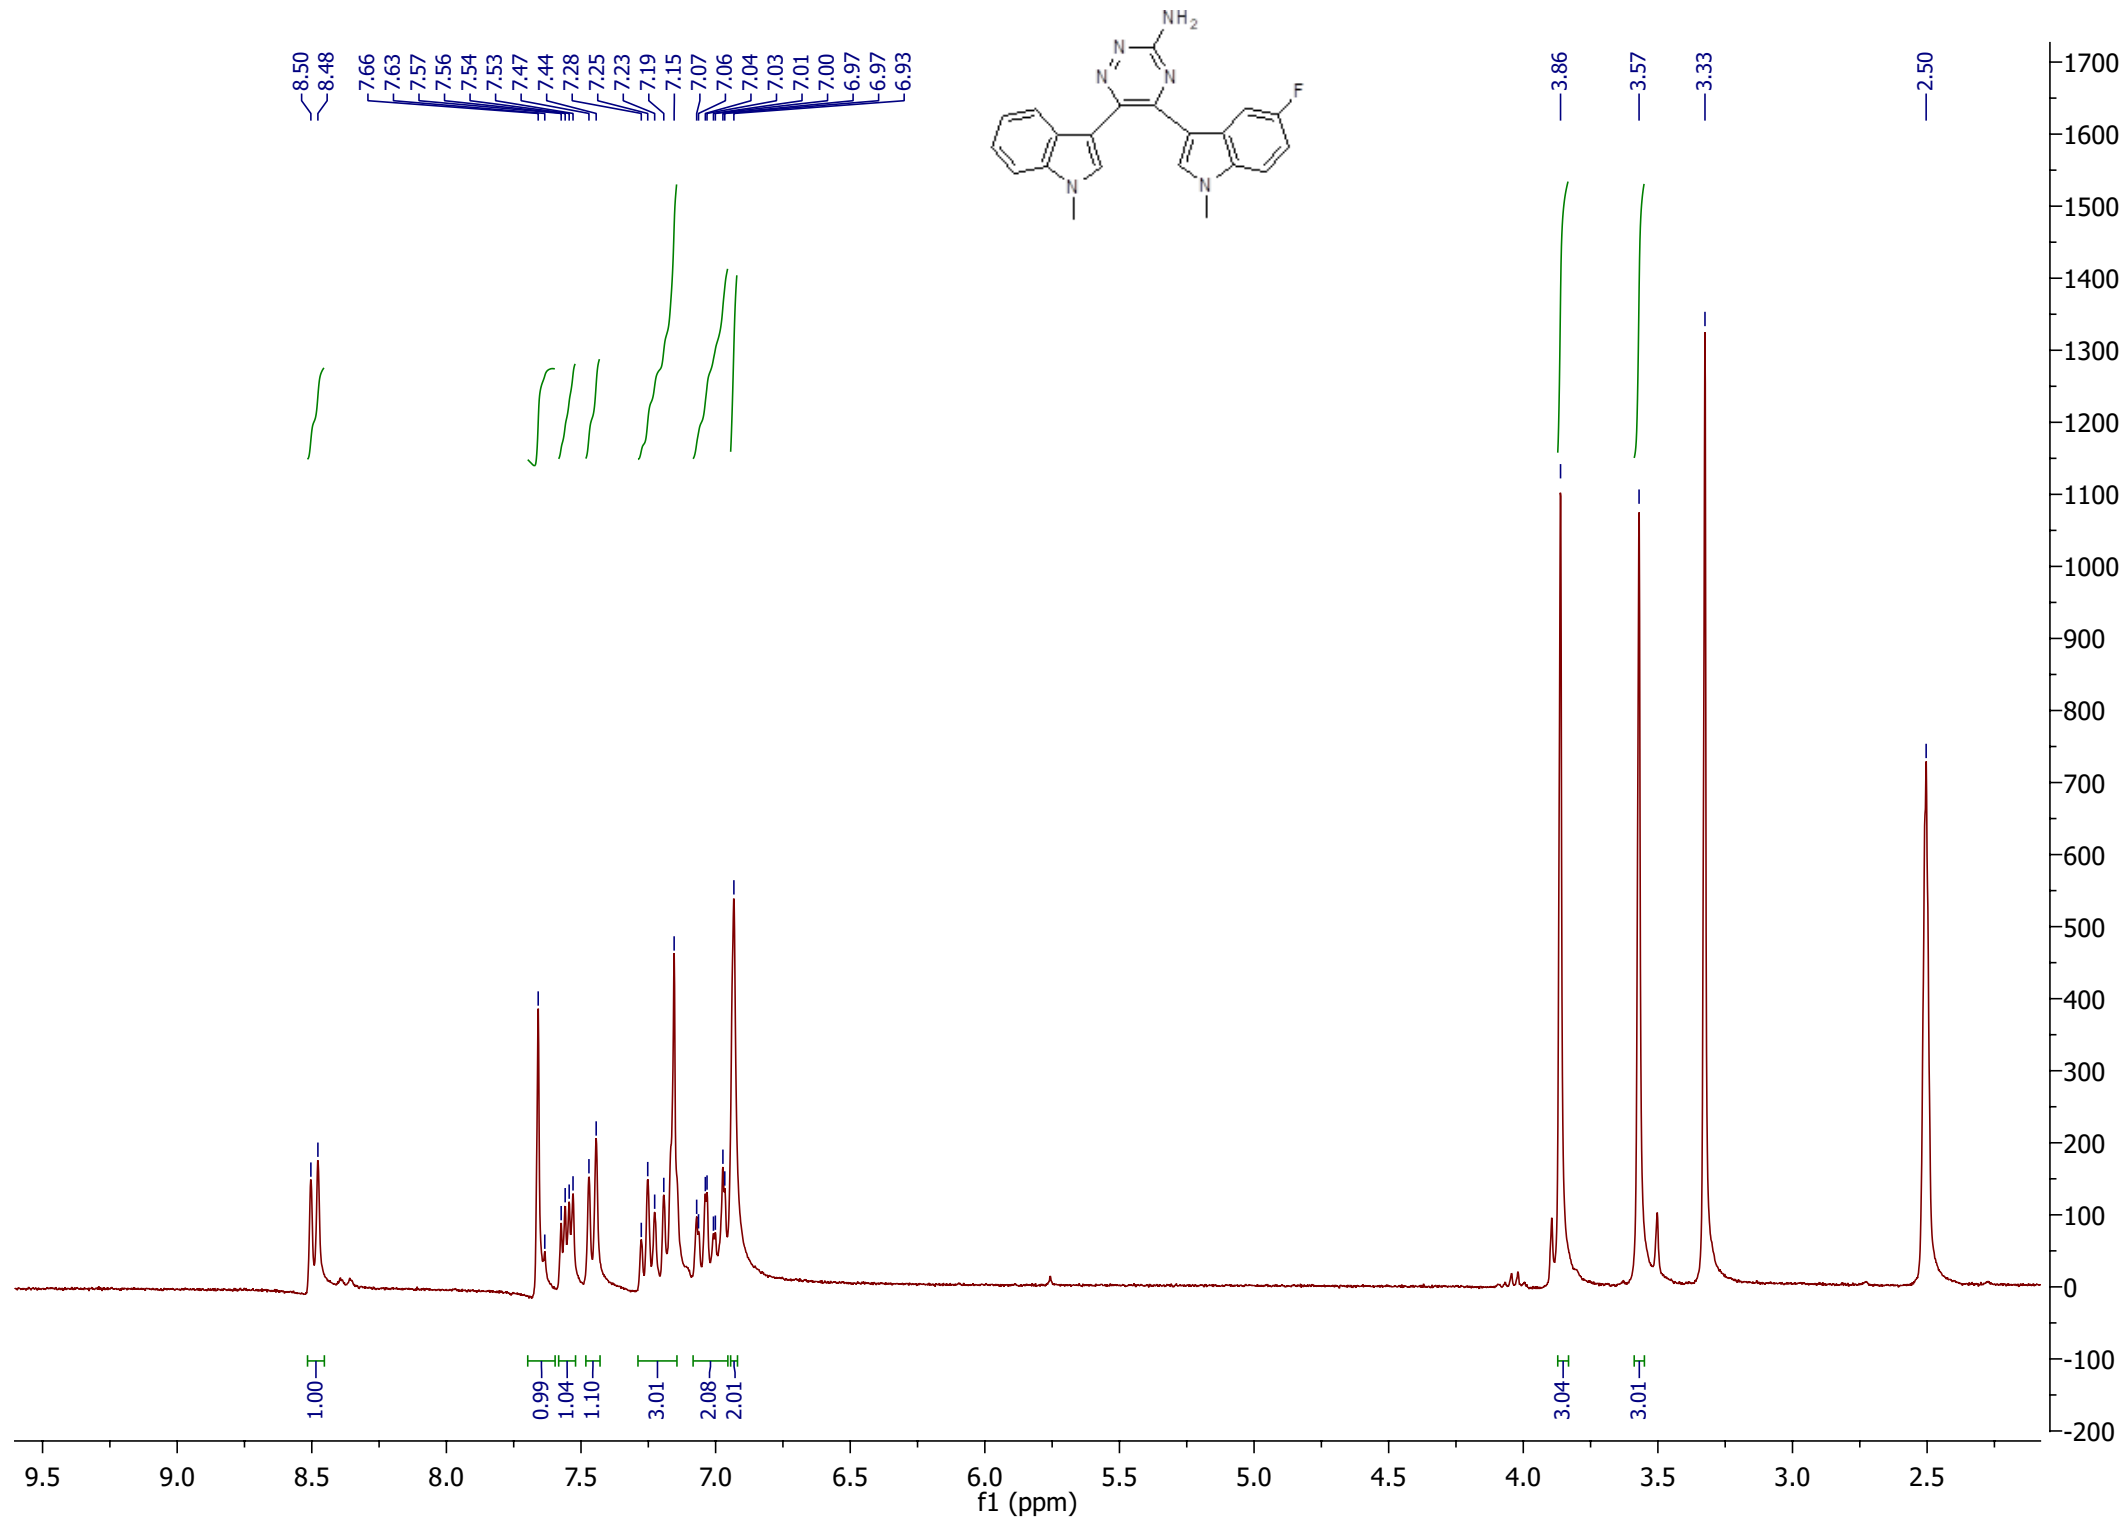

Figure S10: <sup>1</sup>H NMR spectrum of compound **5i**



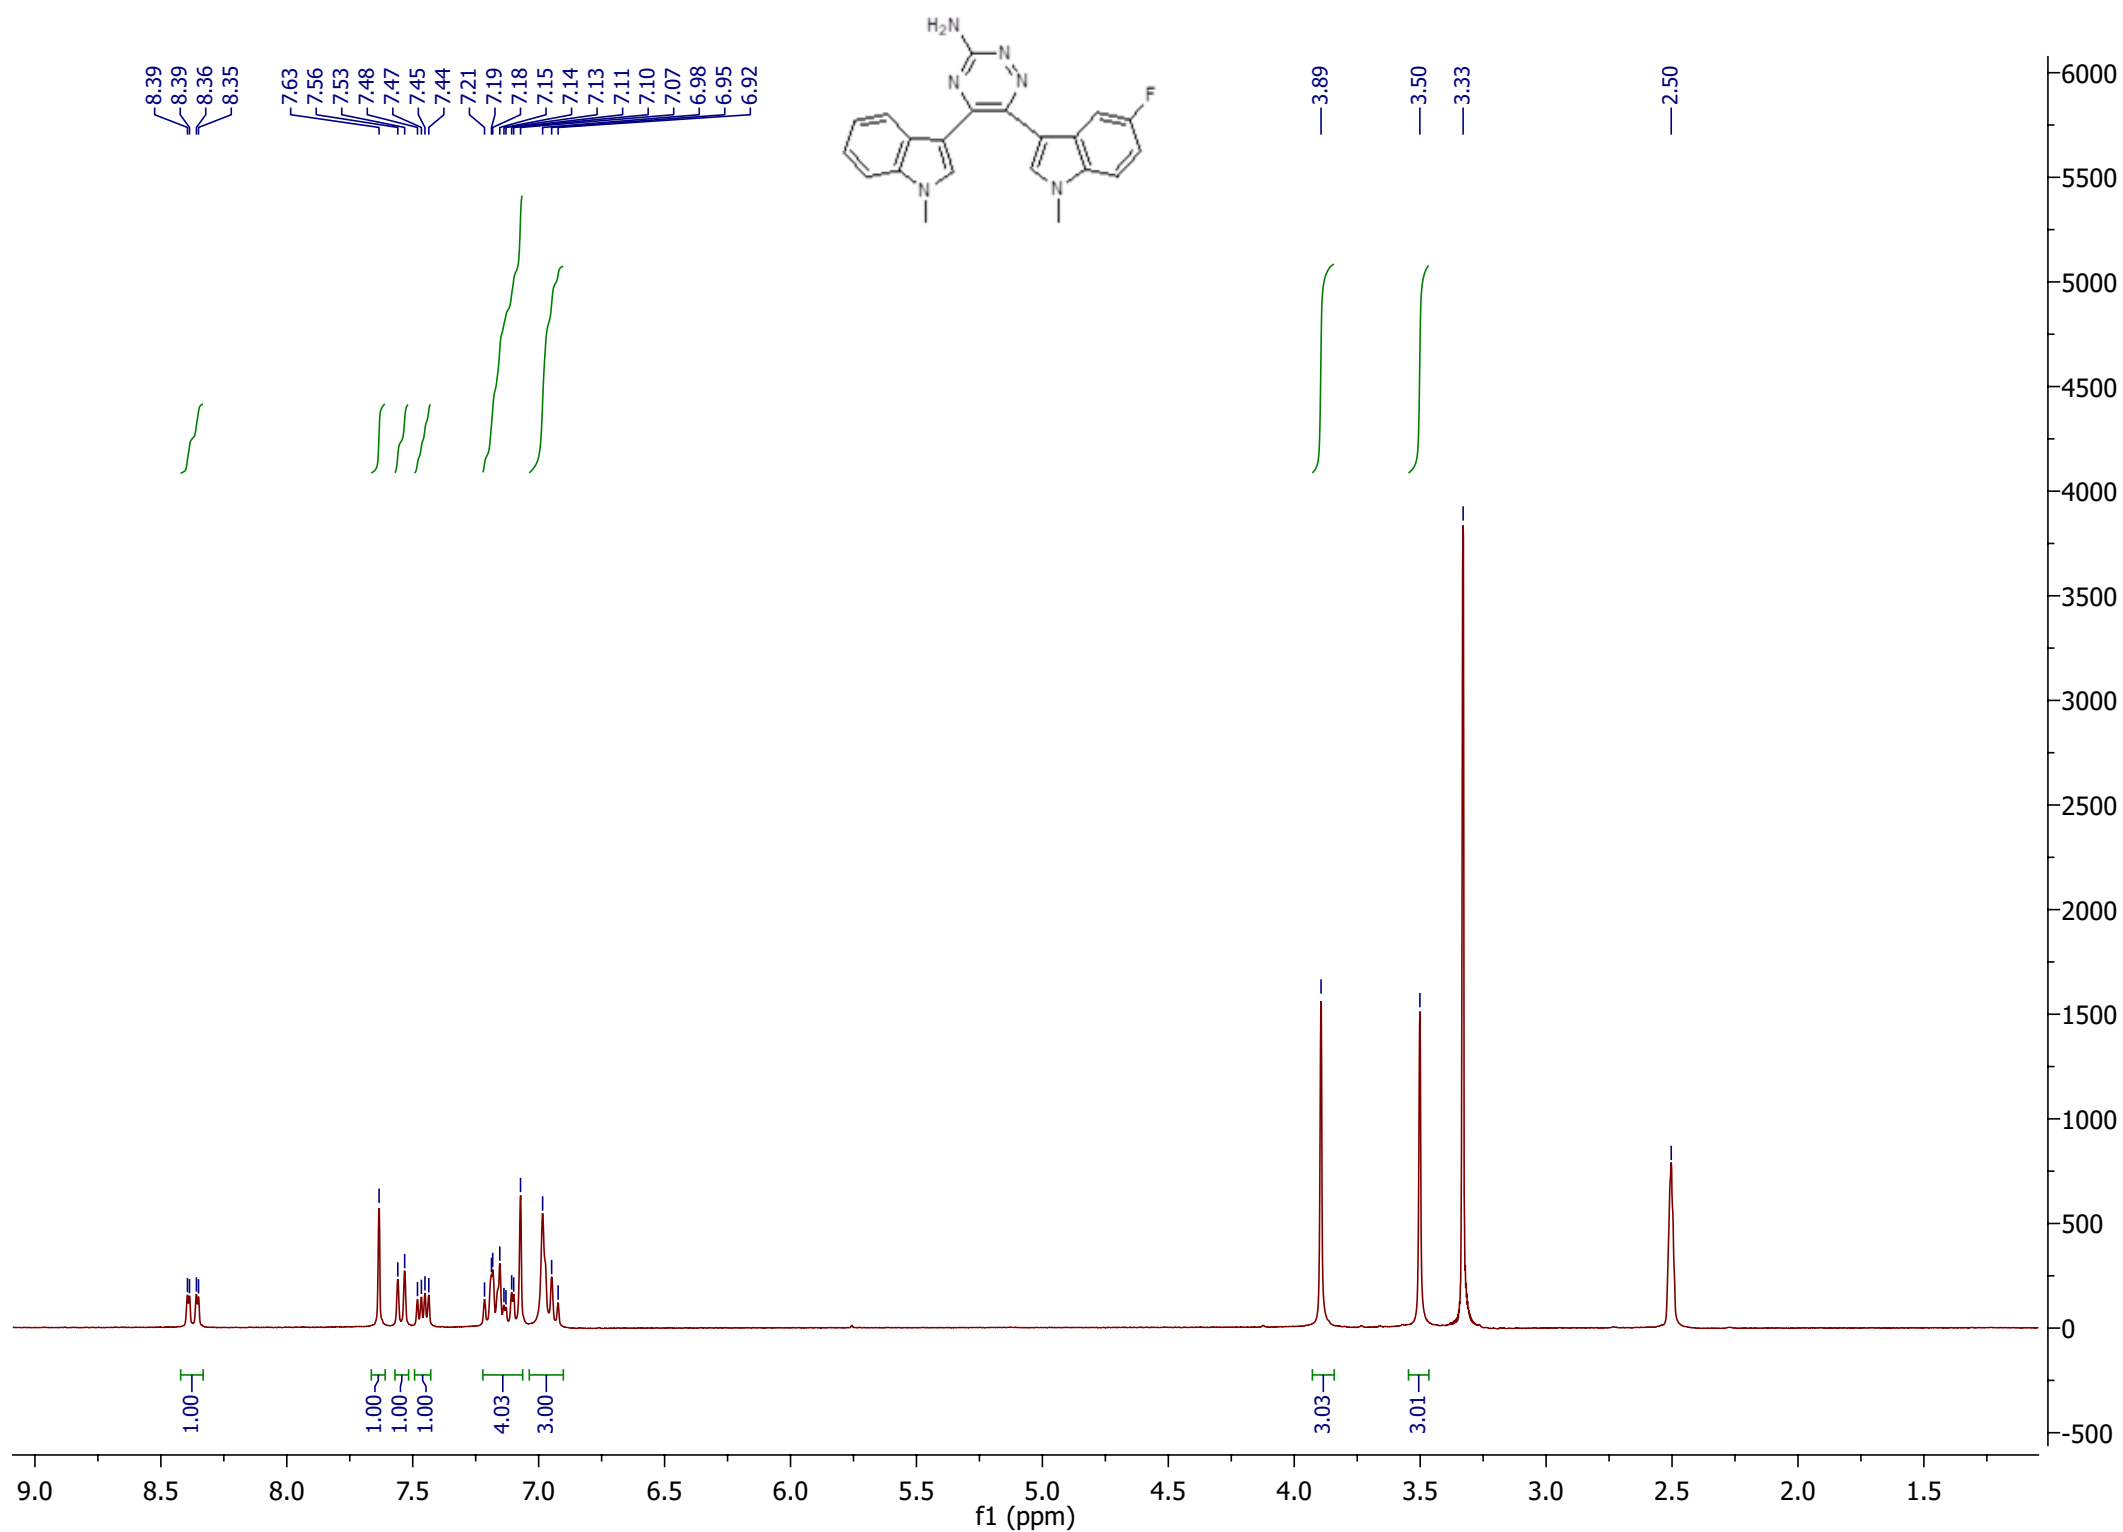

**Figure S11:**  $^1\text{H}$  NMR spectrum of compound **6i**

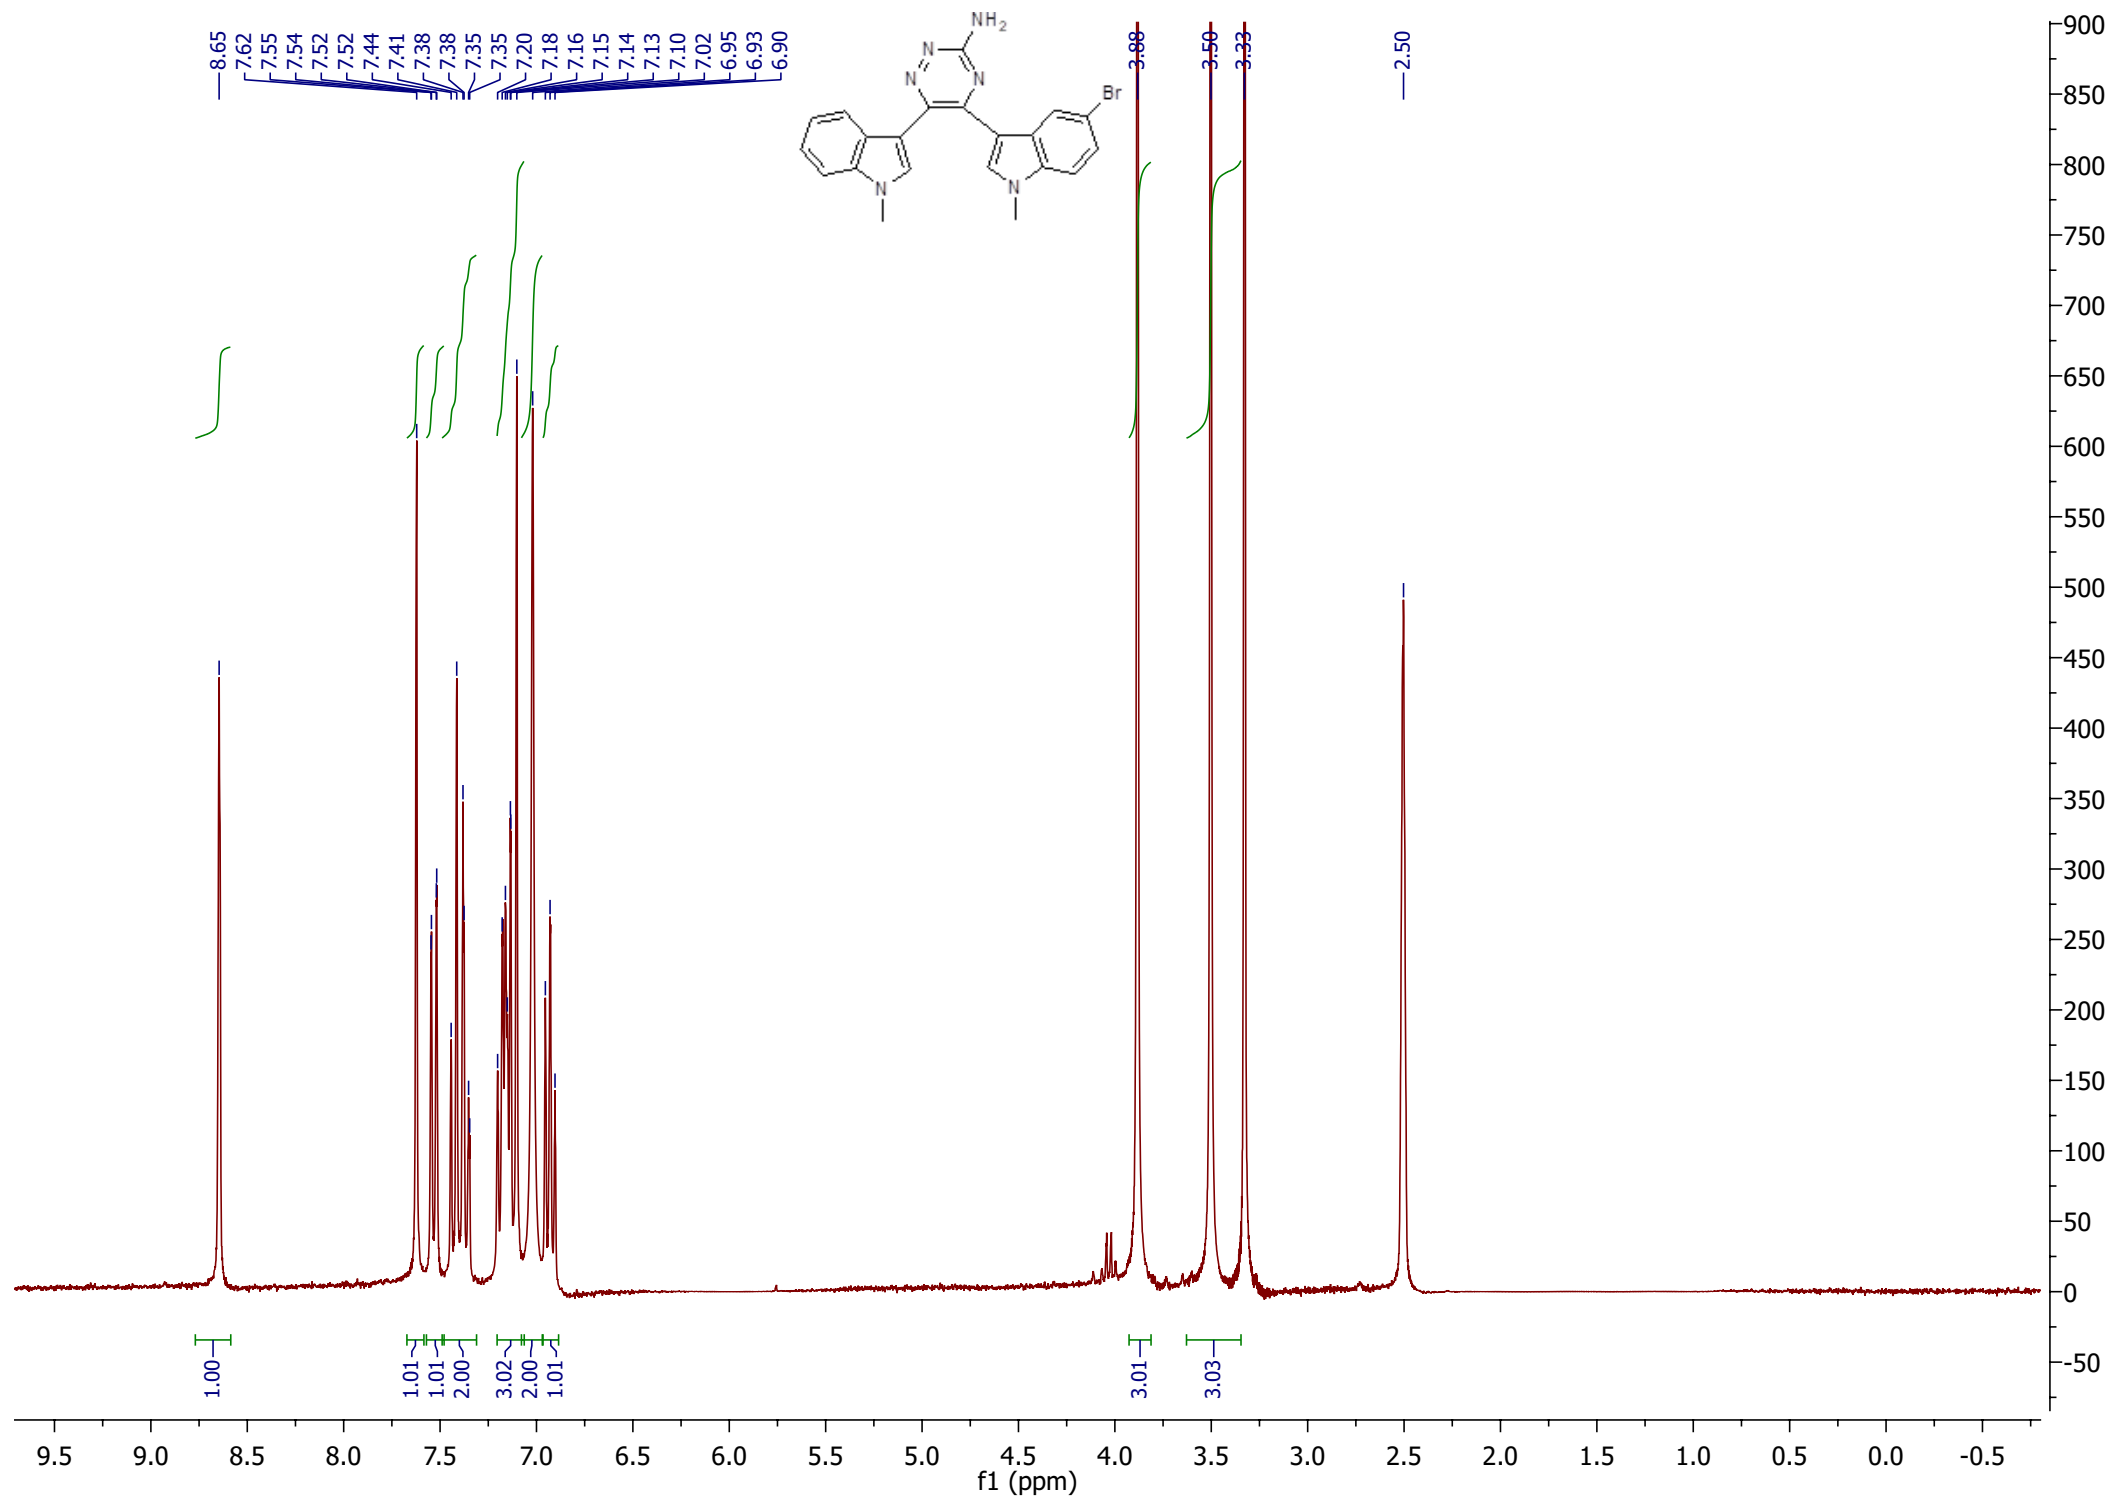

**Figure S12:** <sup>1</sup>H NMR spectrum of compound **5j**

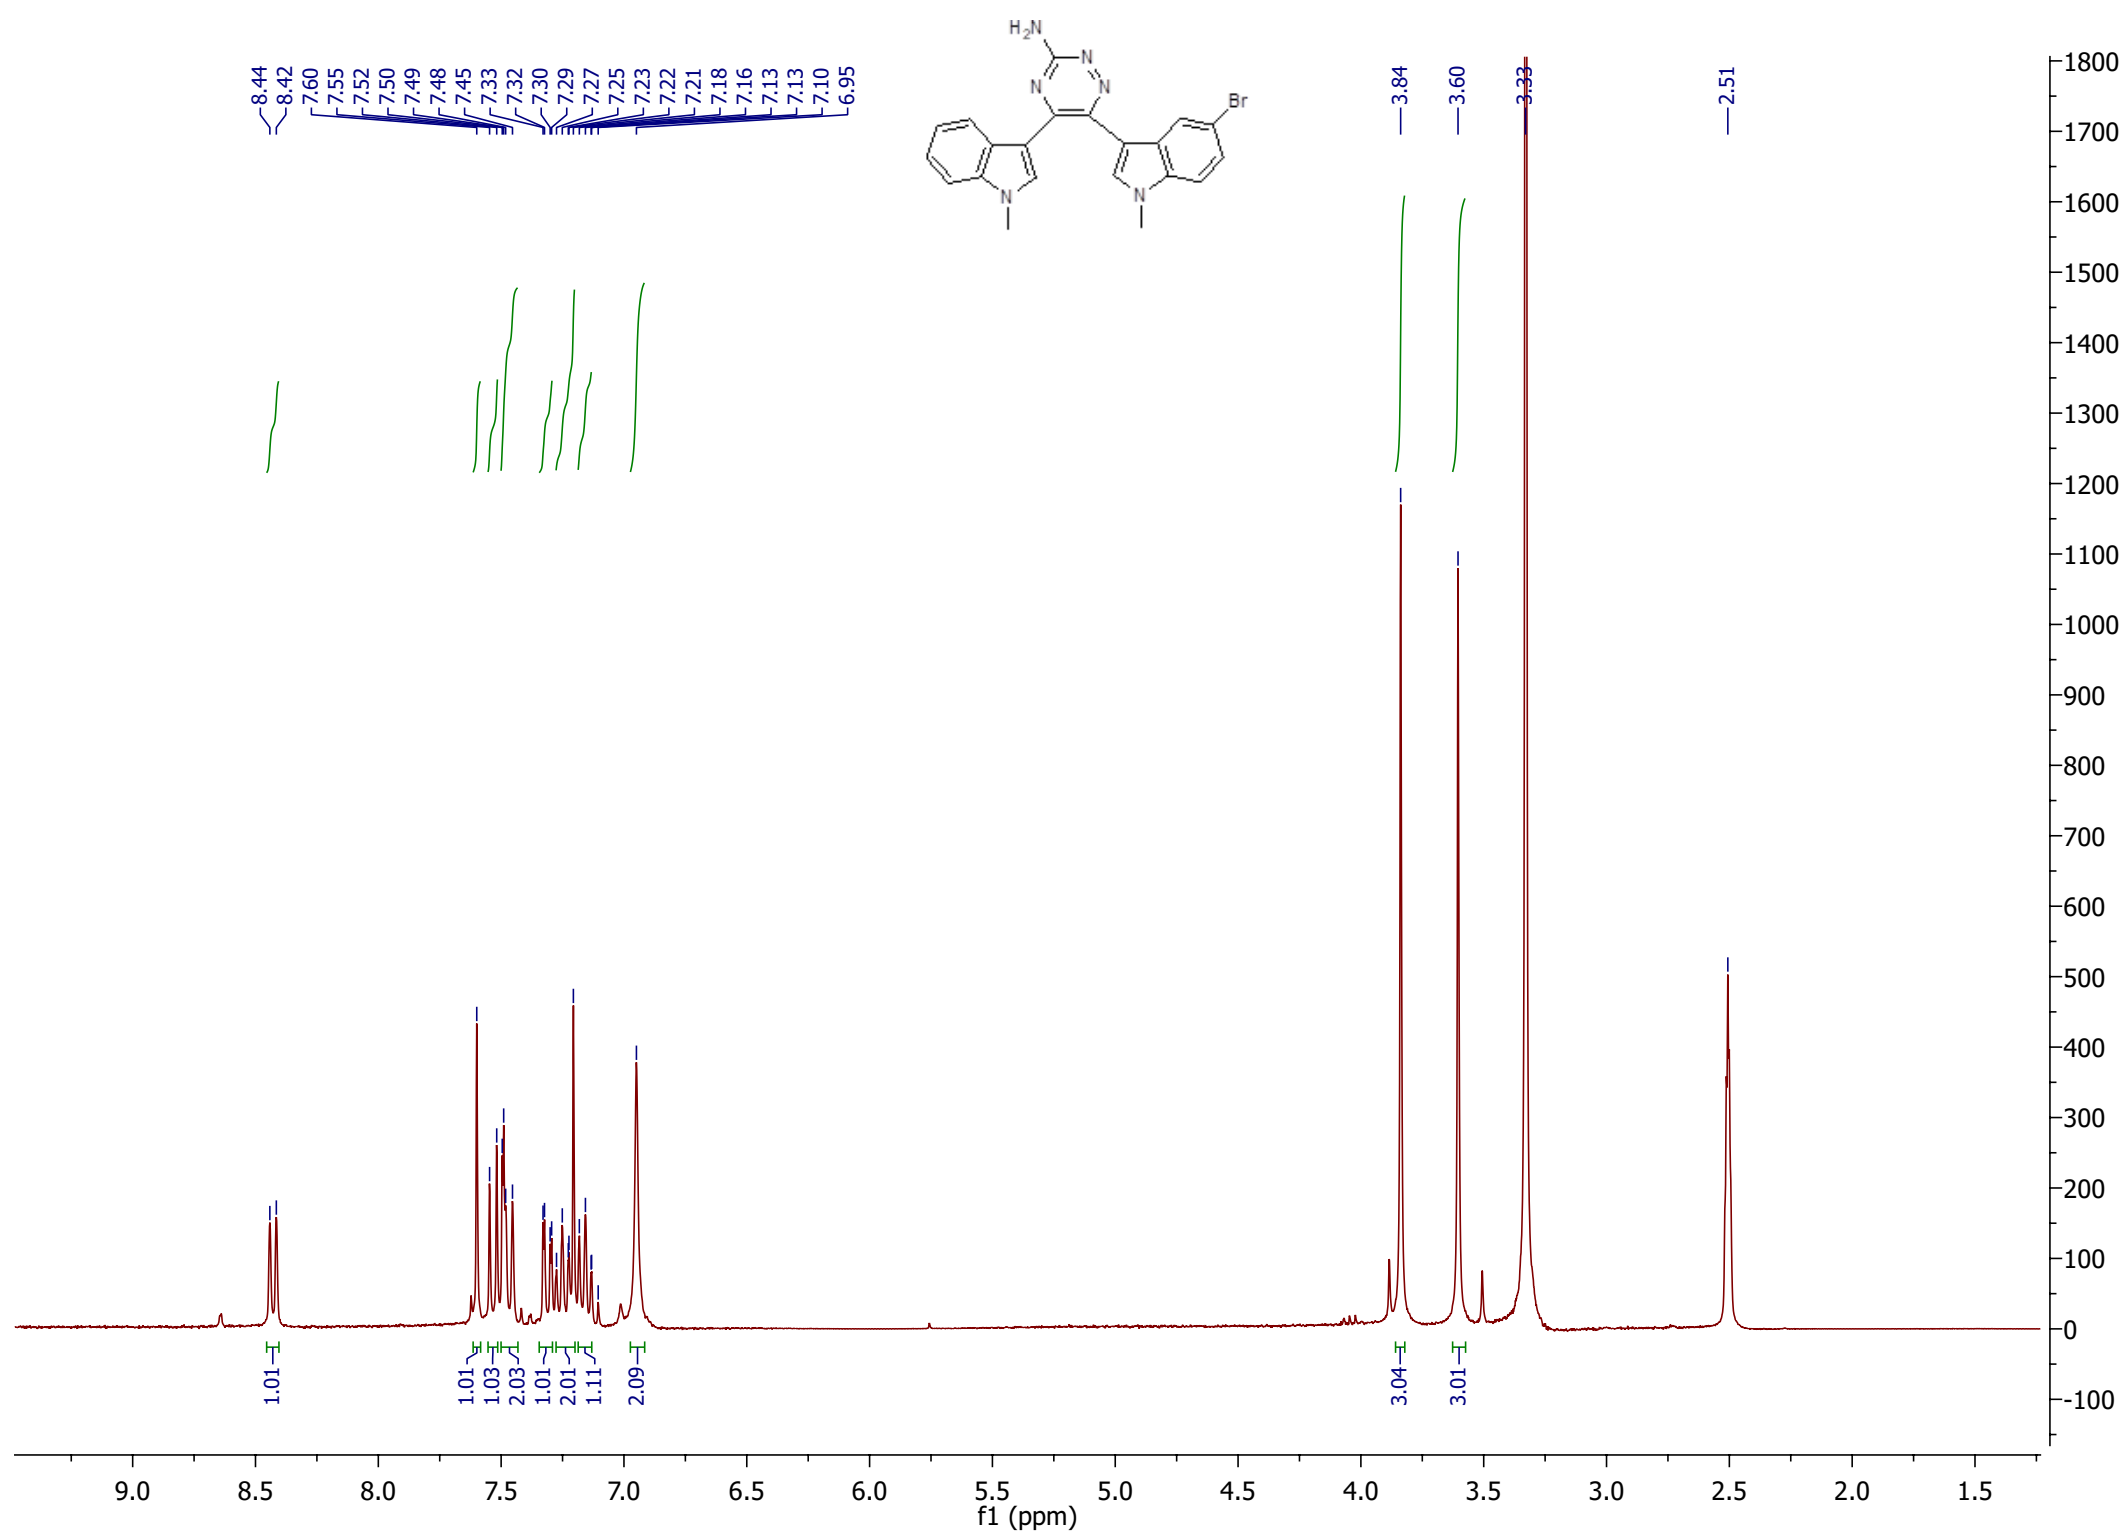

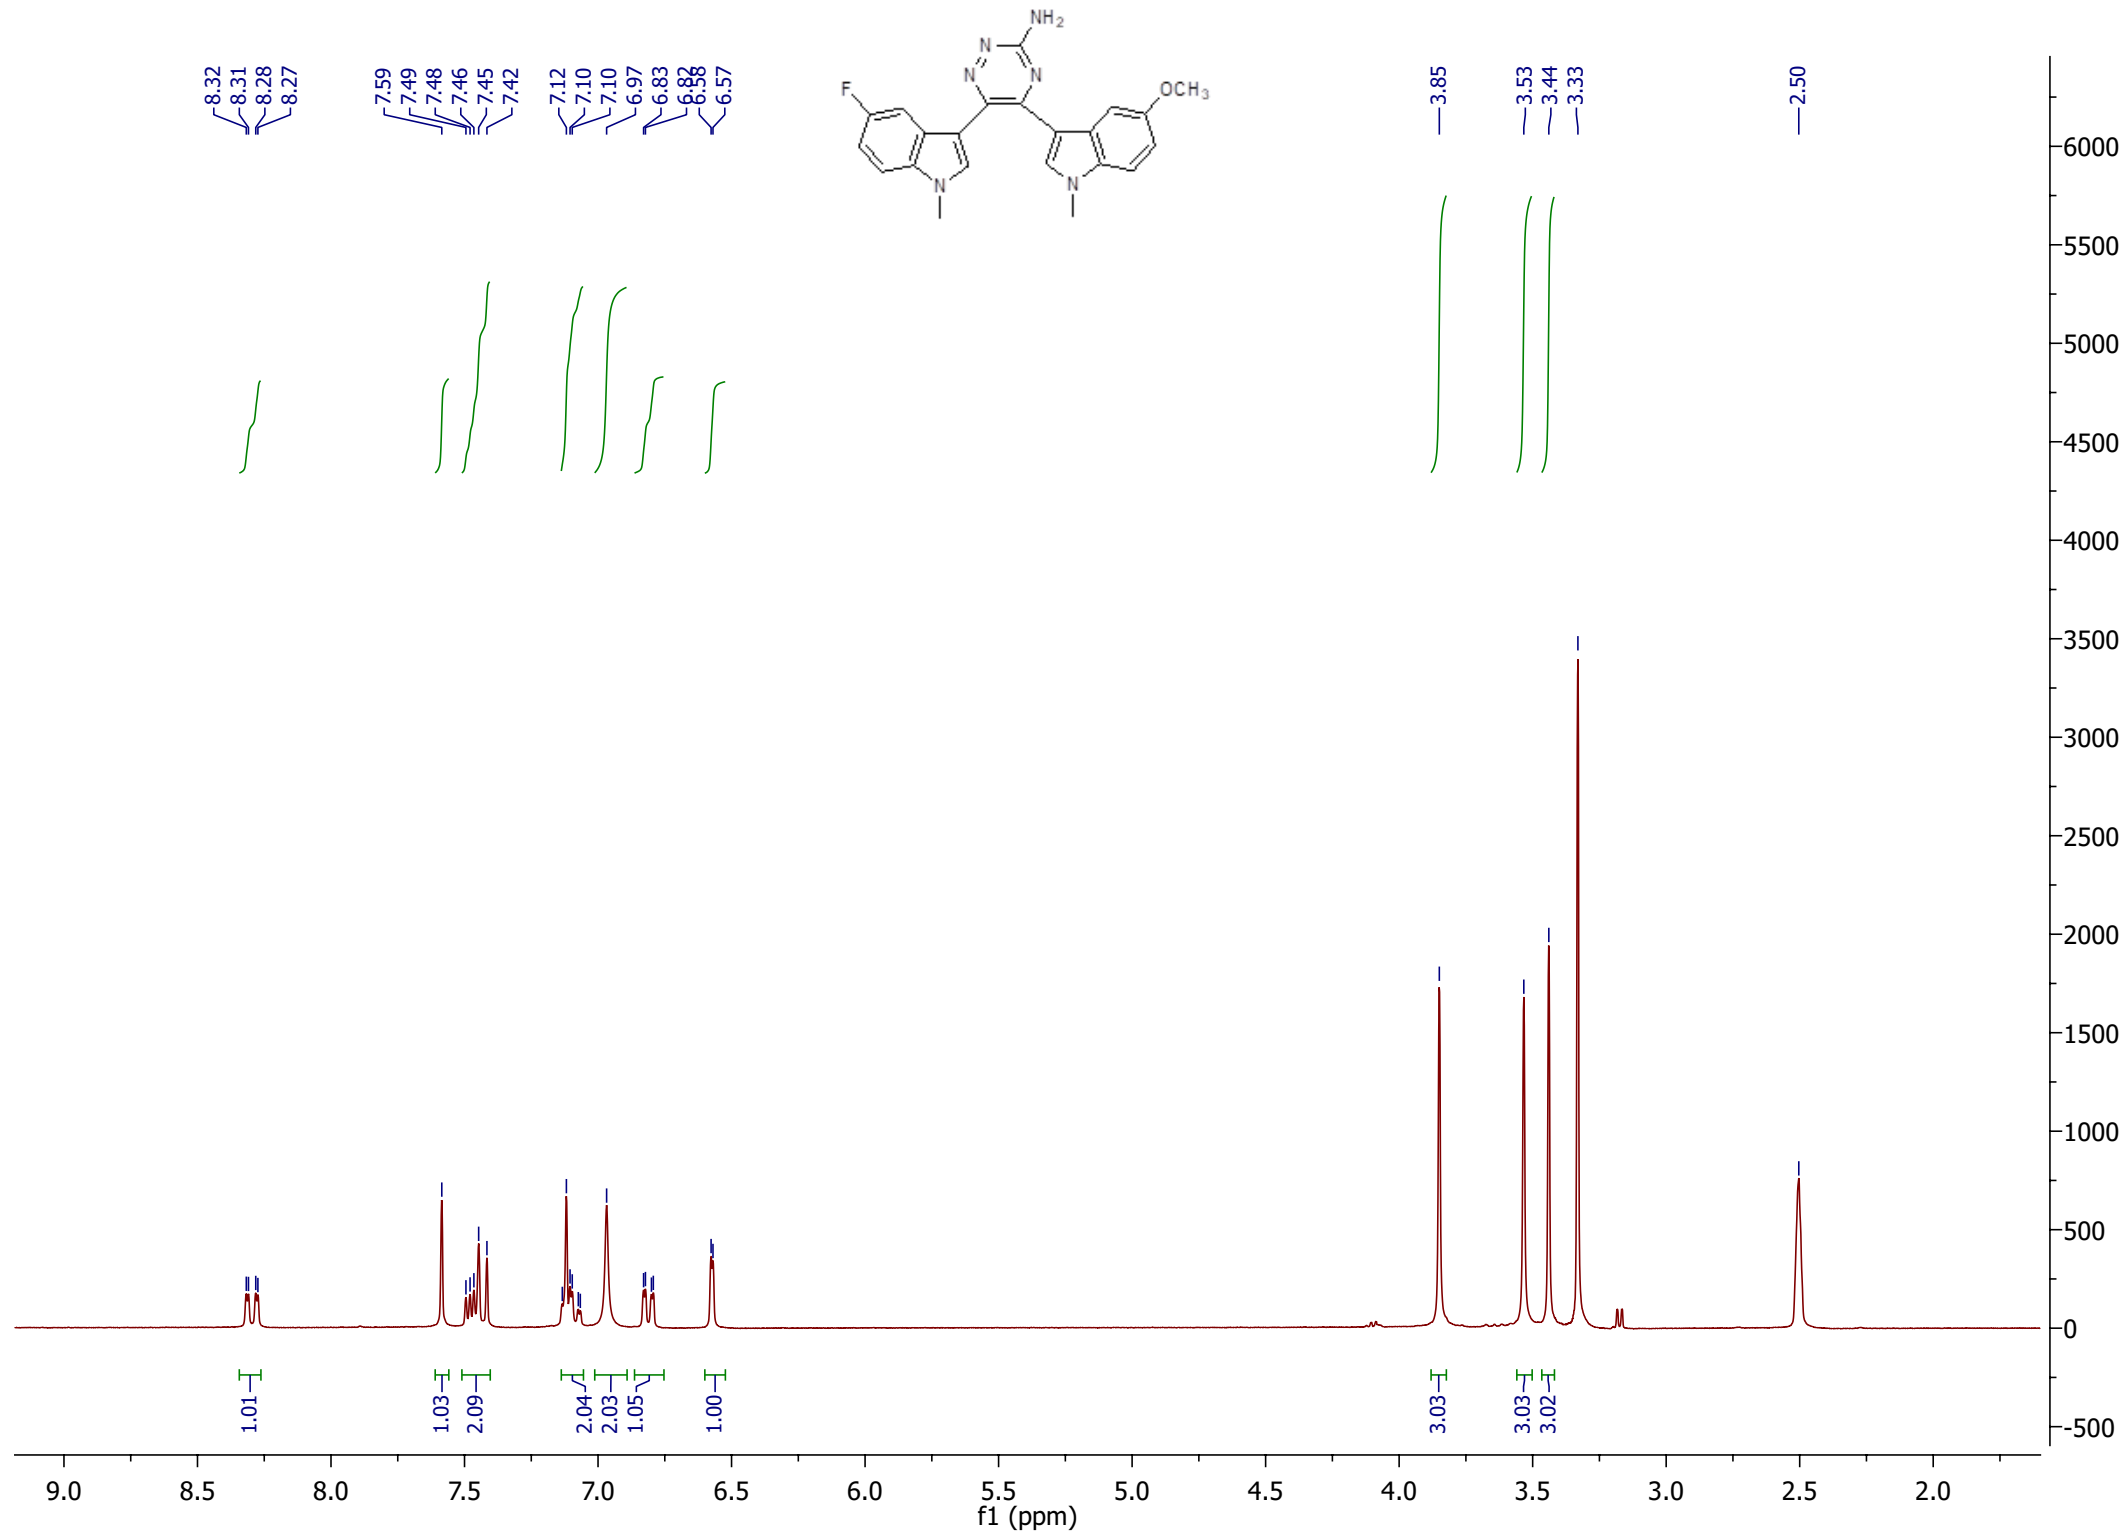

Figure S14: <sup>1</sup>H NMR spectrum of compound **5k**

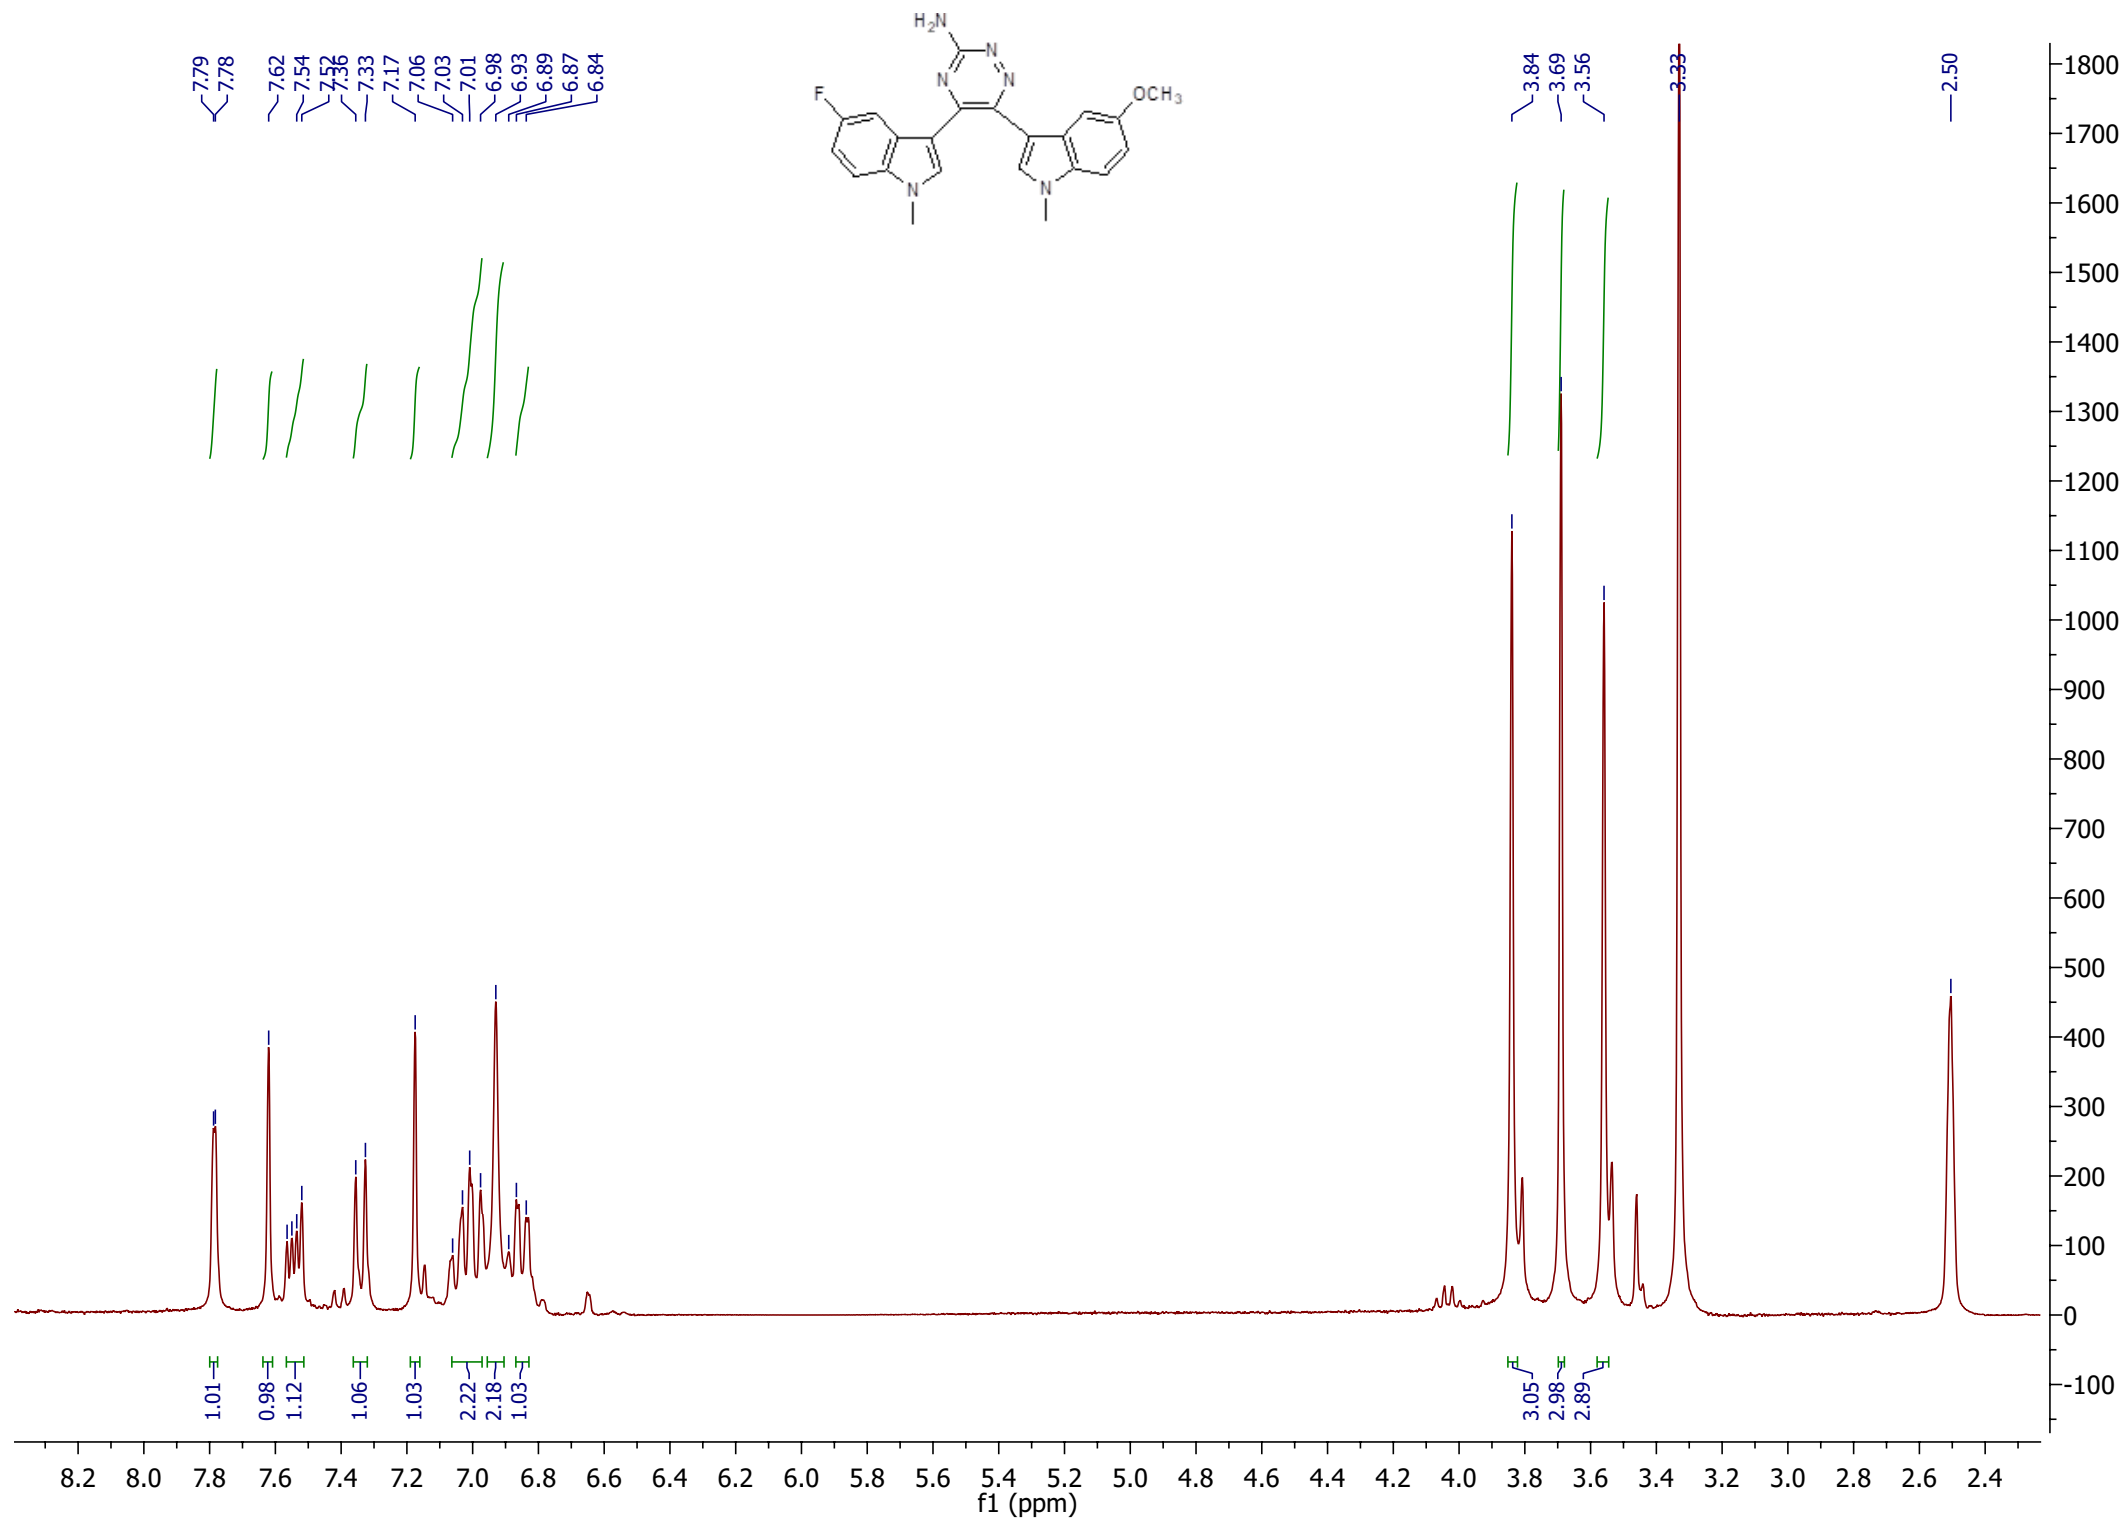

**Figure S15:**  $^1\text{H}$  NMR spectrum of compound **6k**

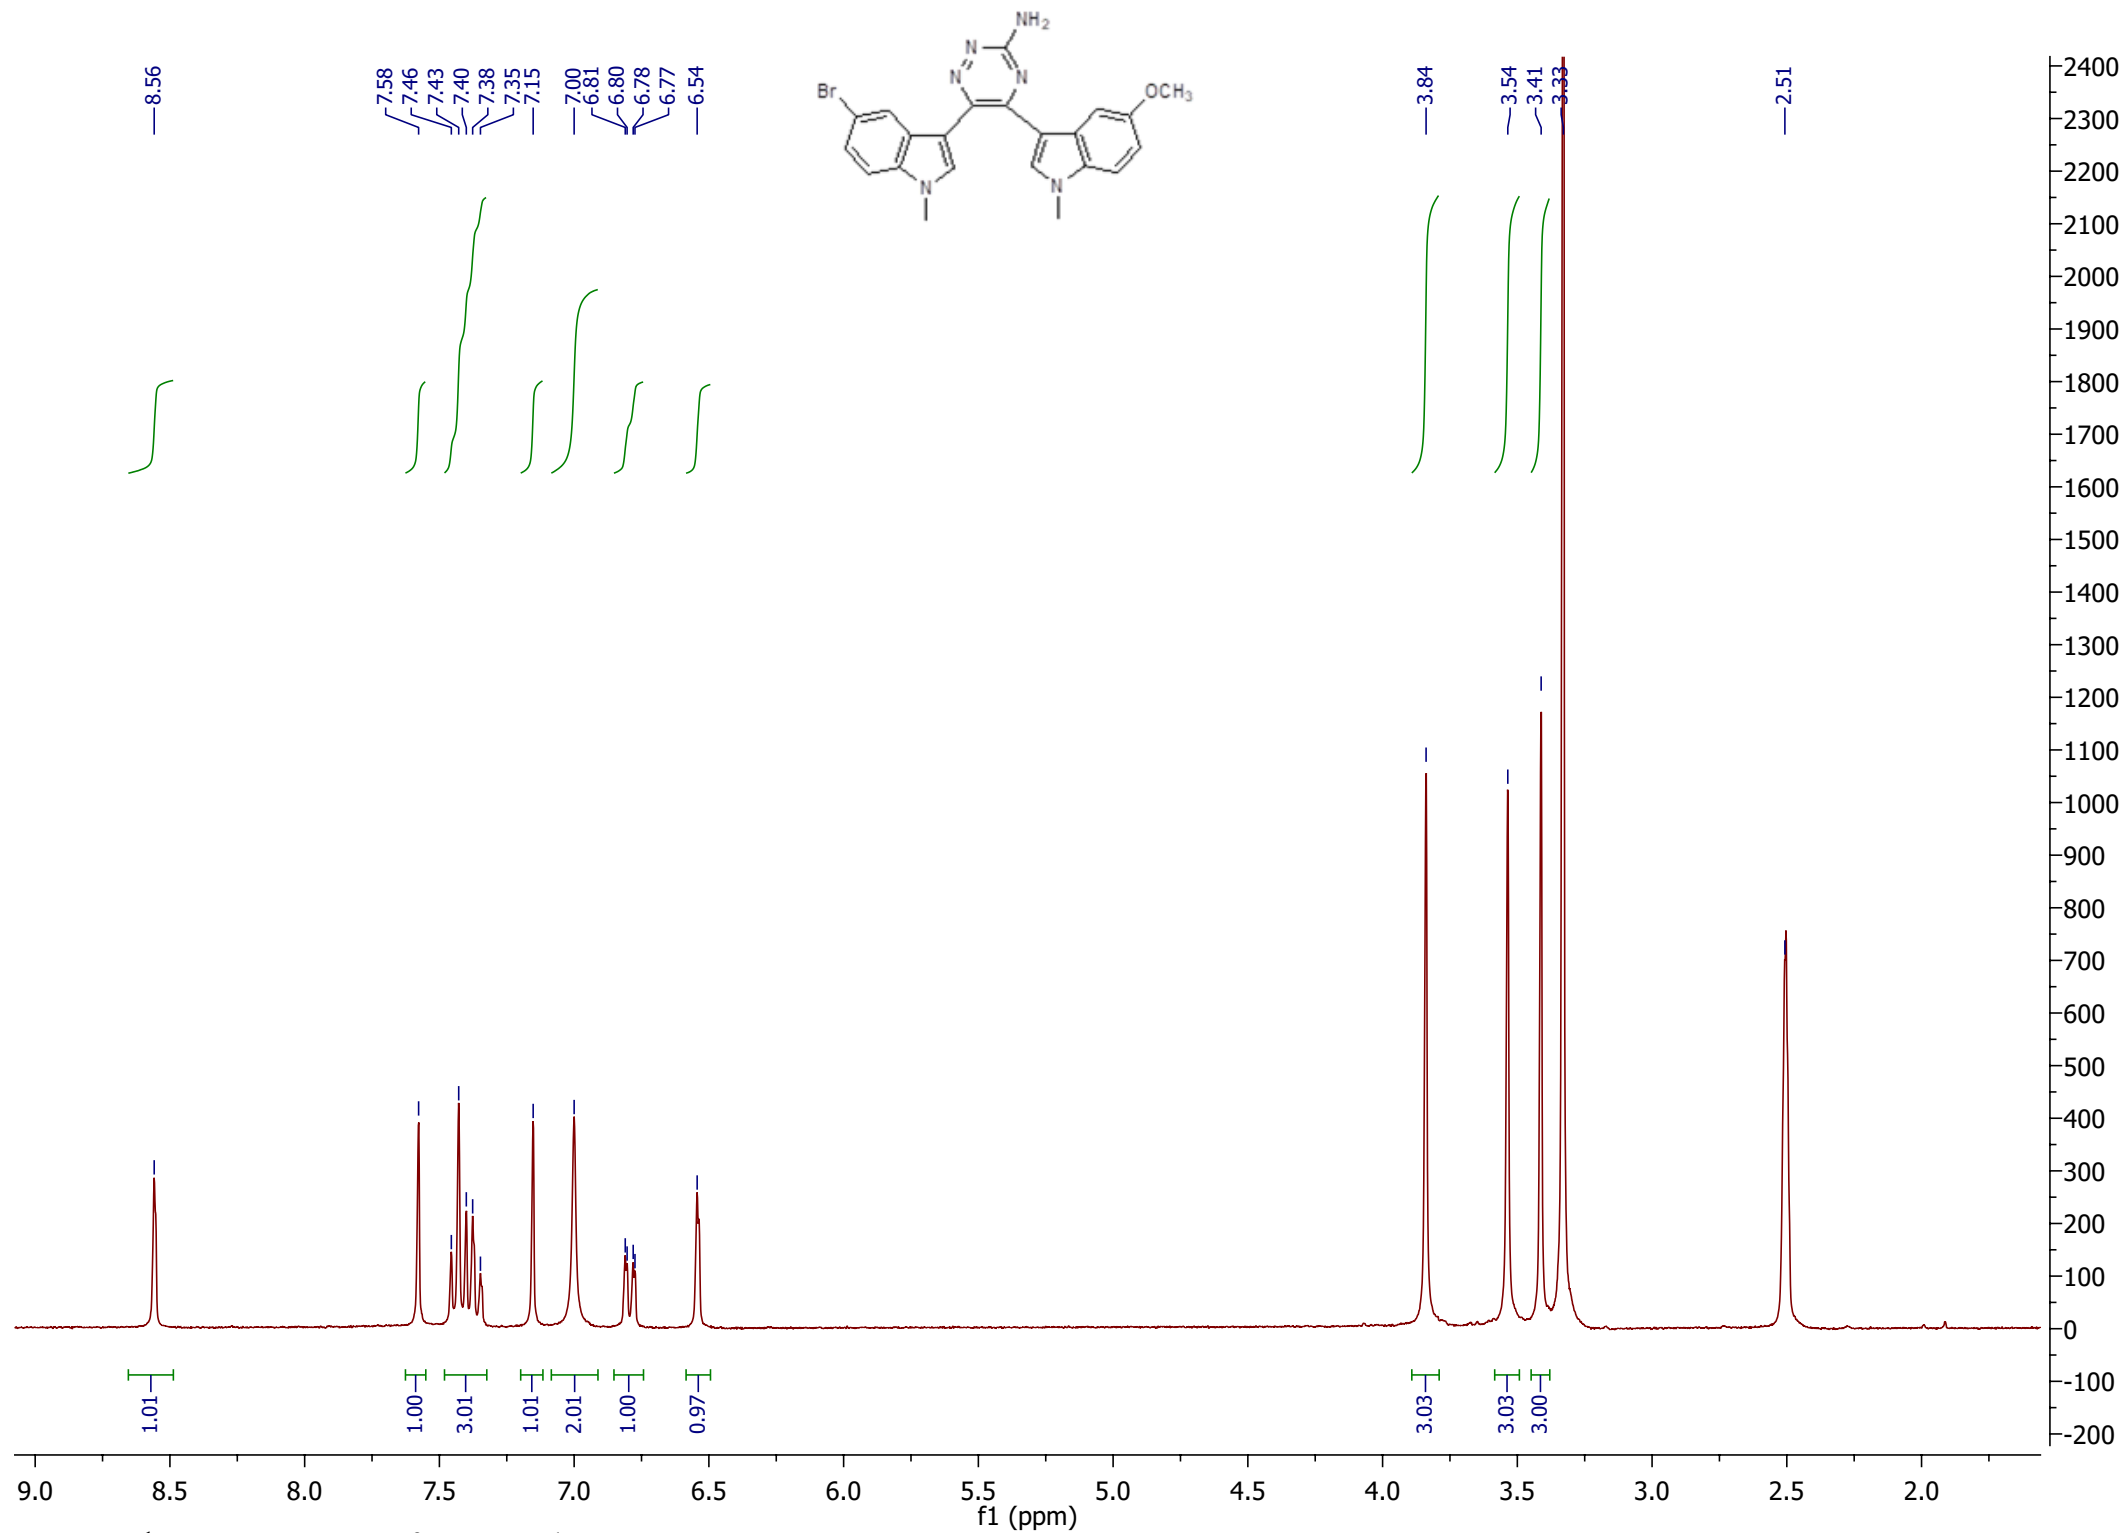

Figure S16:  $^1\text{H}$  NMR spectrum of compound **51**

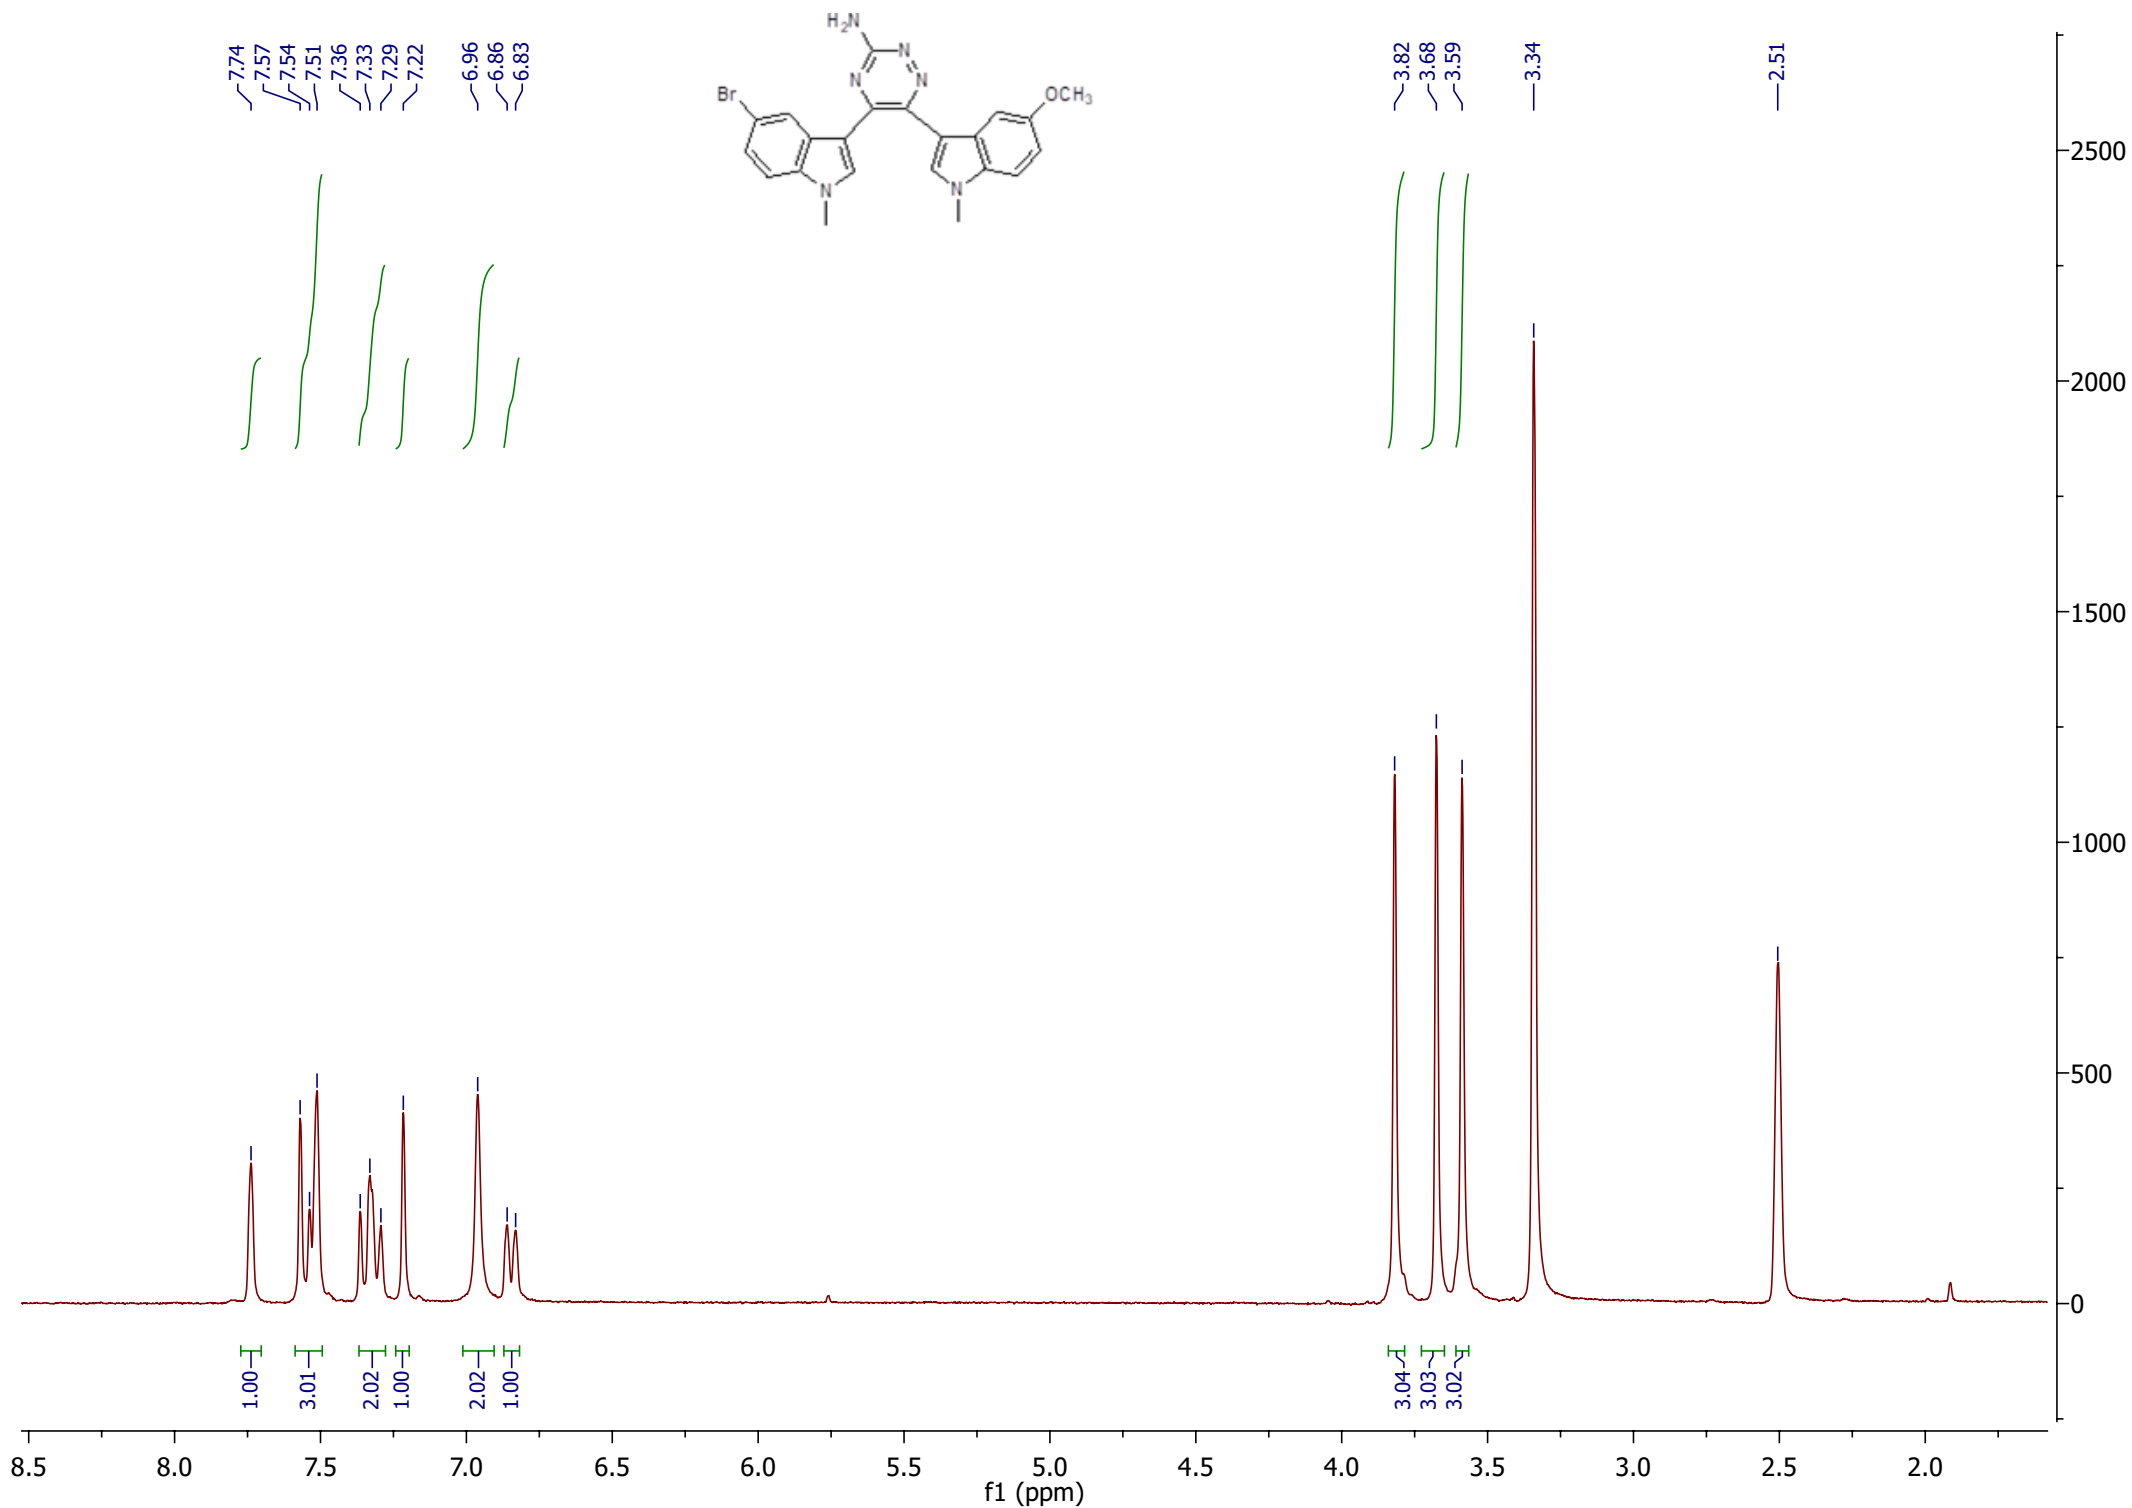

Figure S17:  $^1\text{H}$  NMR spectrum of compound **6l**

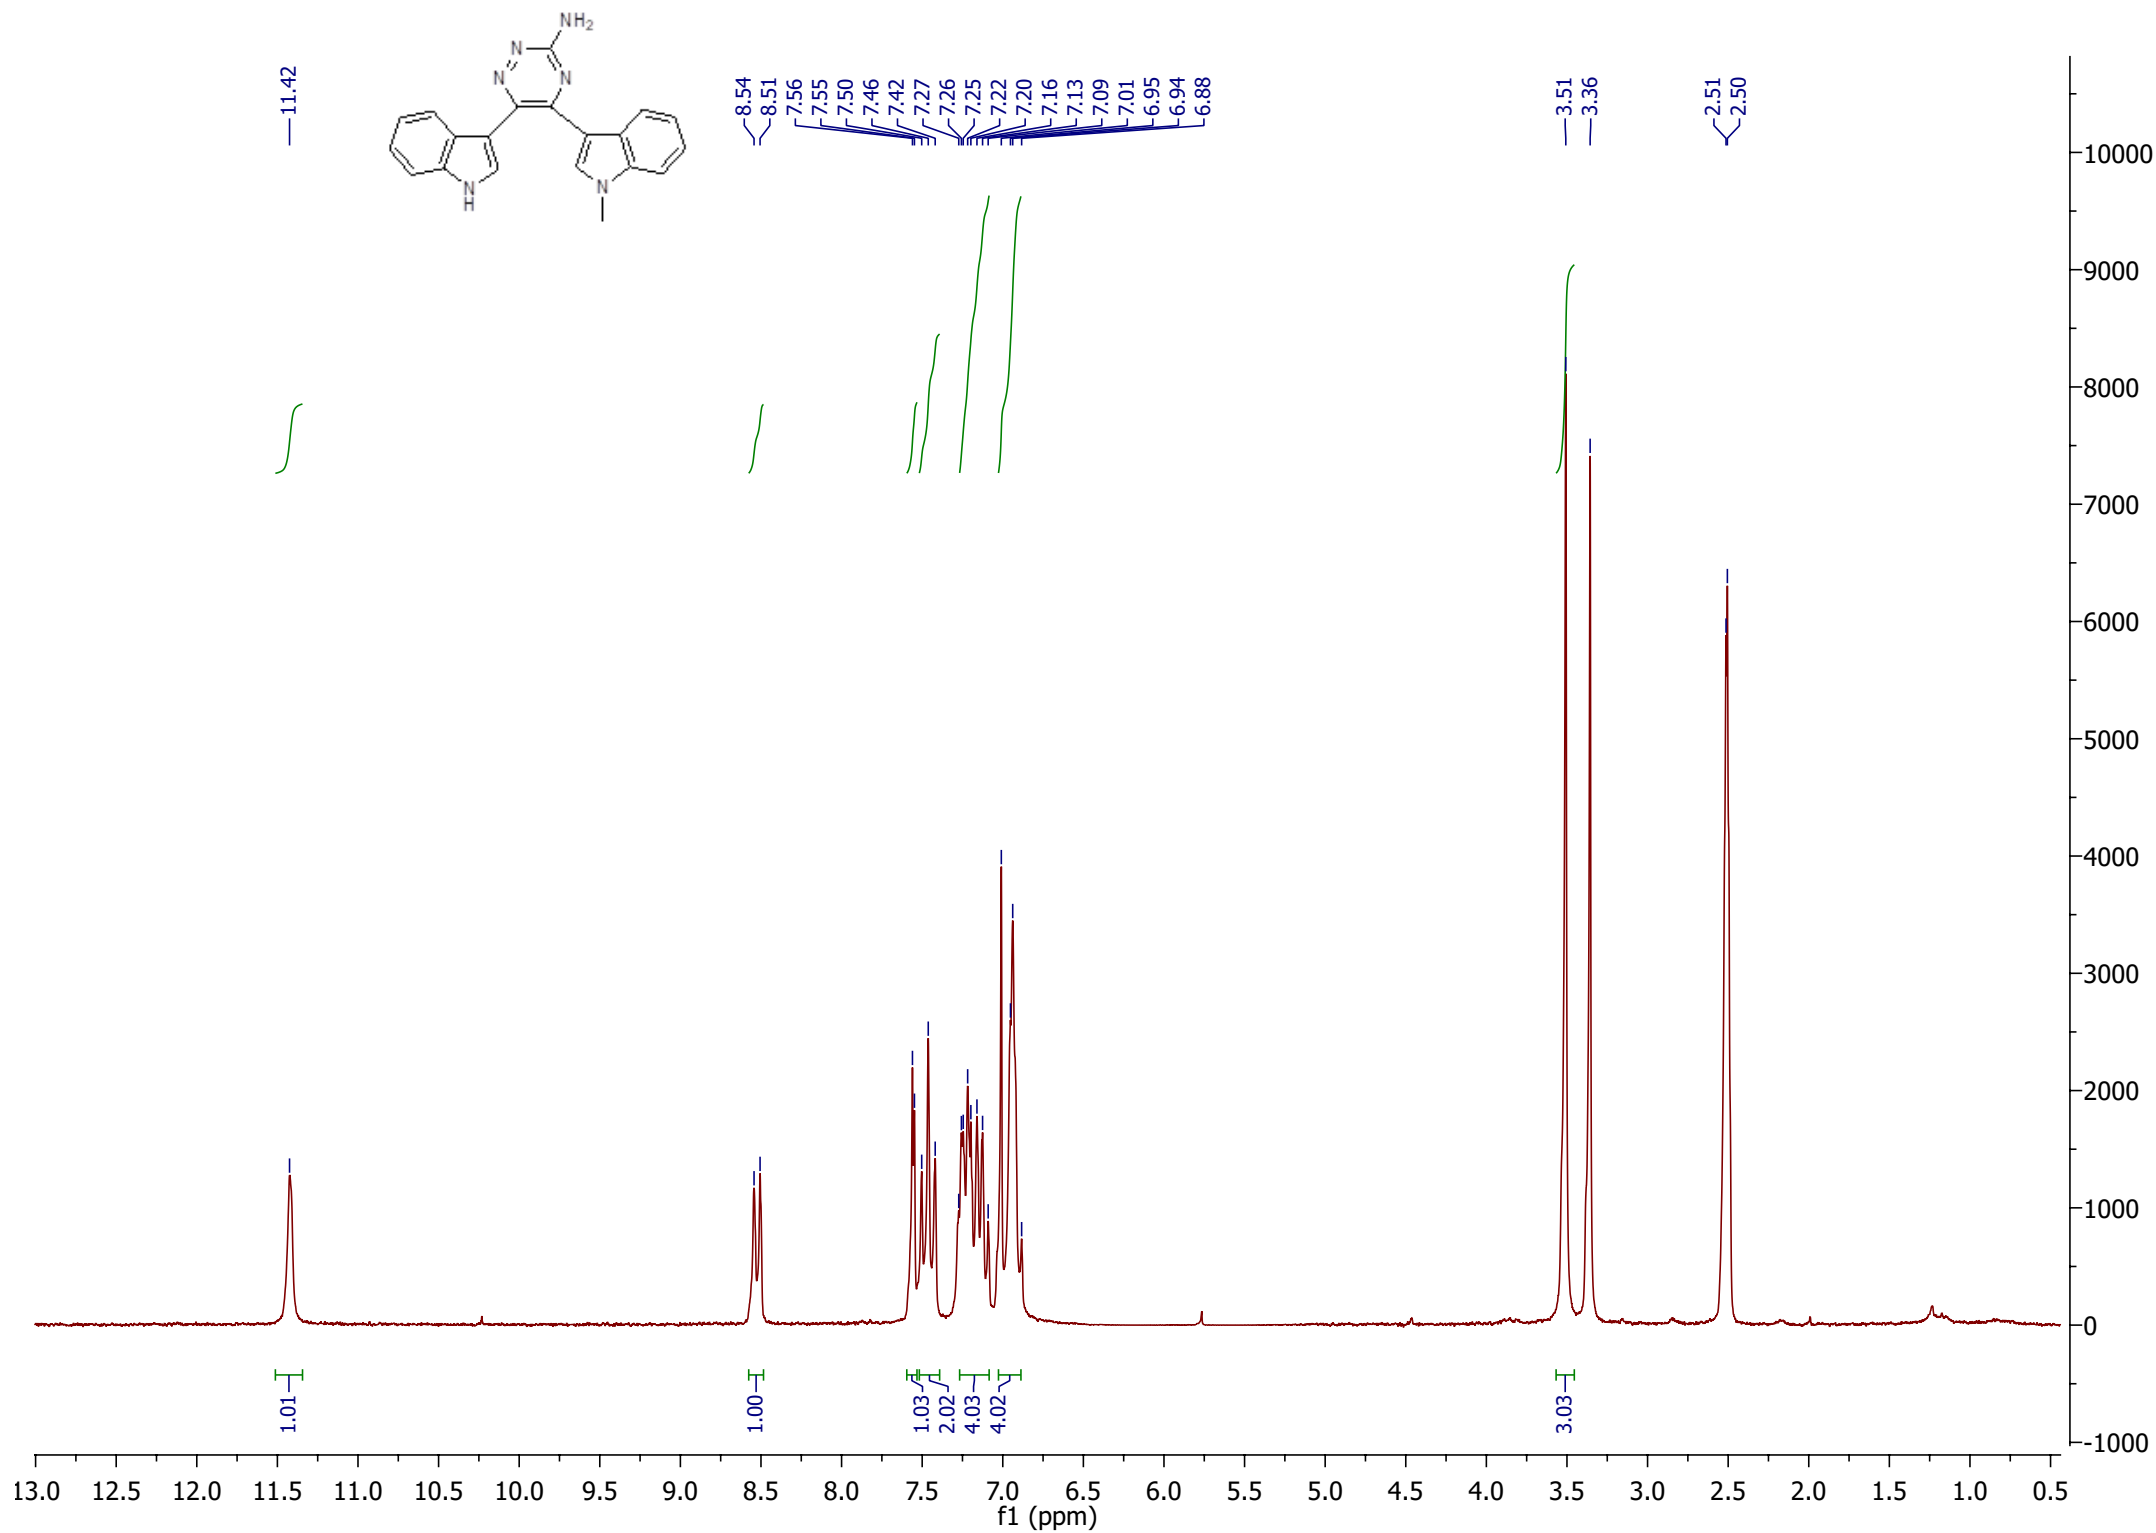

**Figure S18:**  $^1\text{H}$  NMR spectrum of compound **5m**



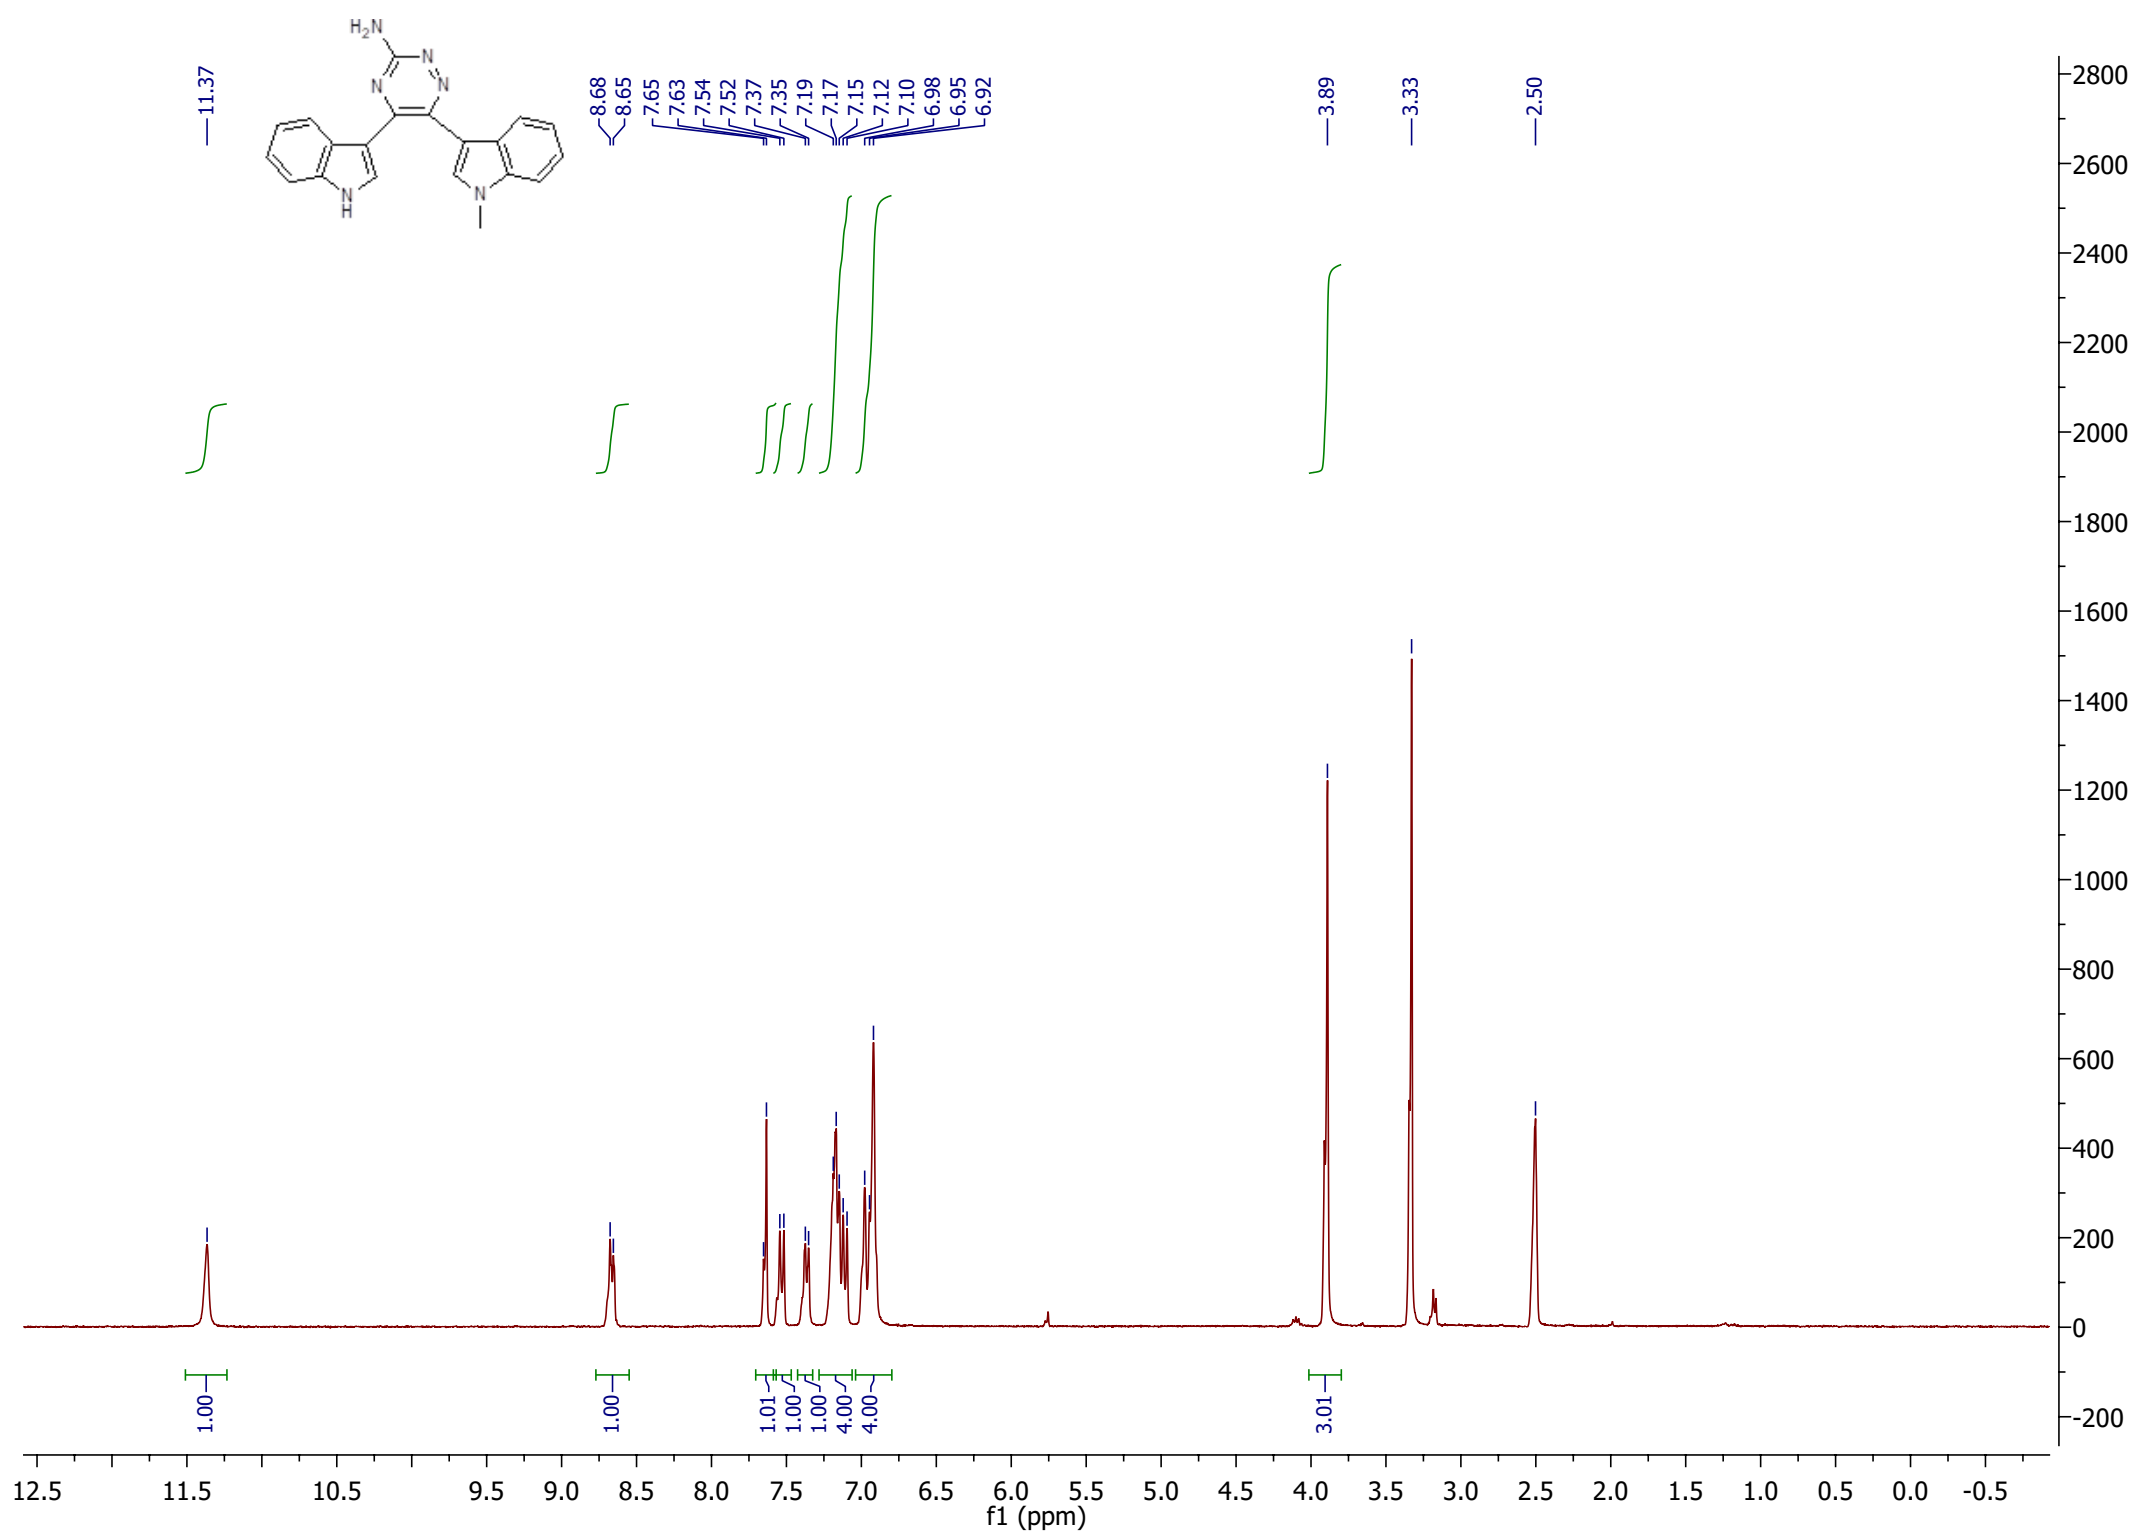

**Figure S19:**  $^1\text{H}$  NMR spectrum of compound **6m**

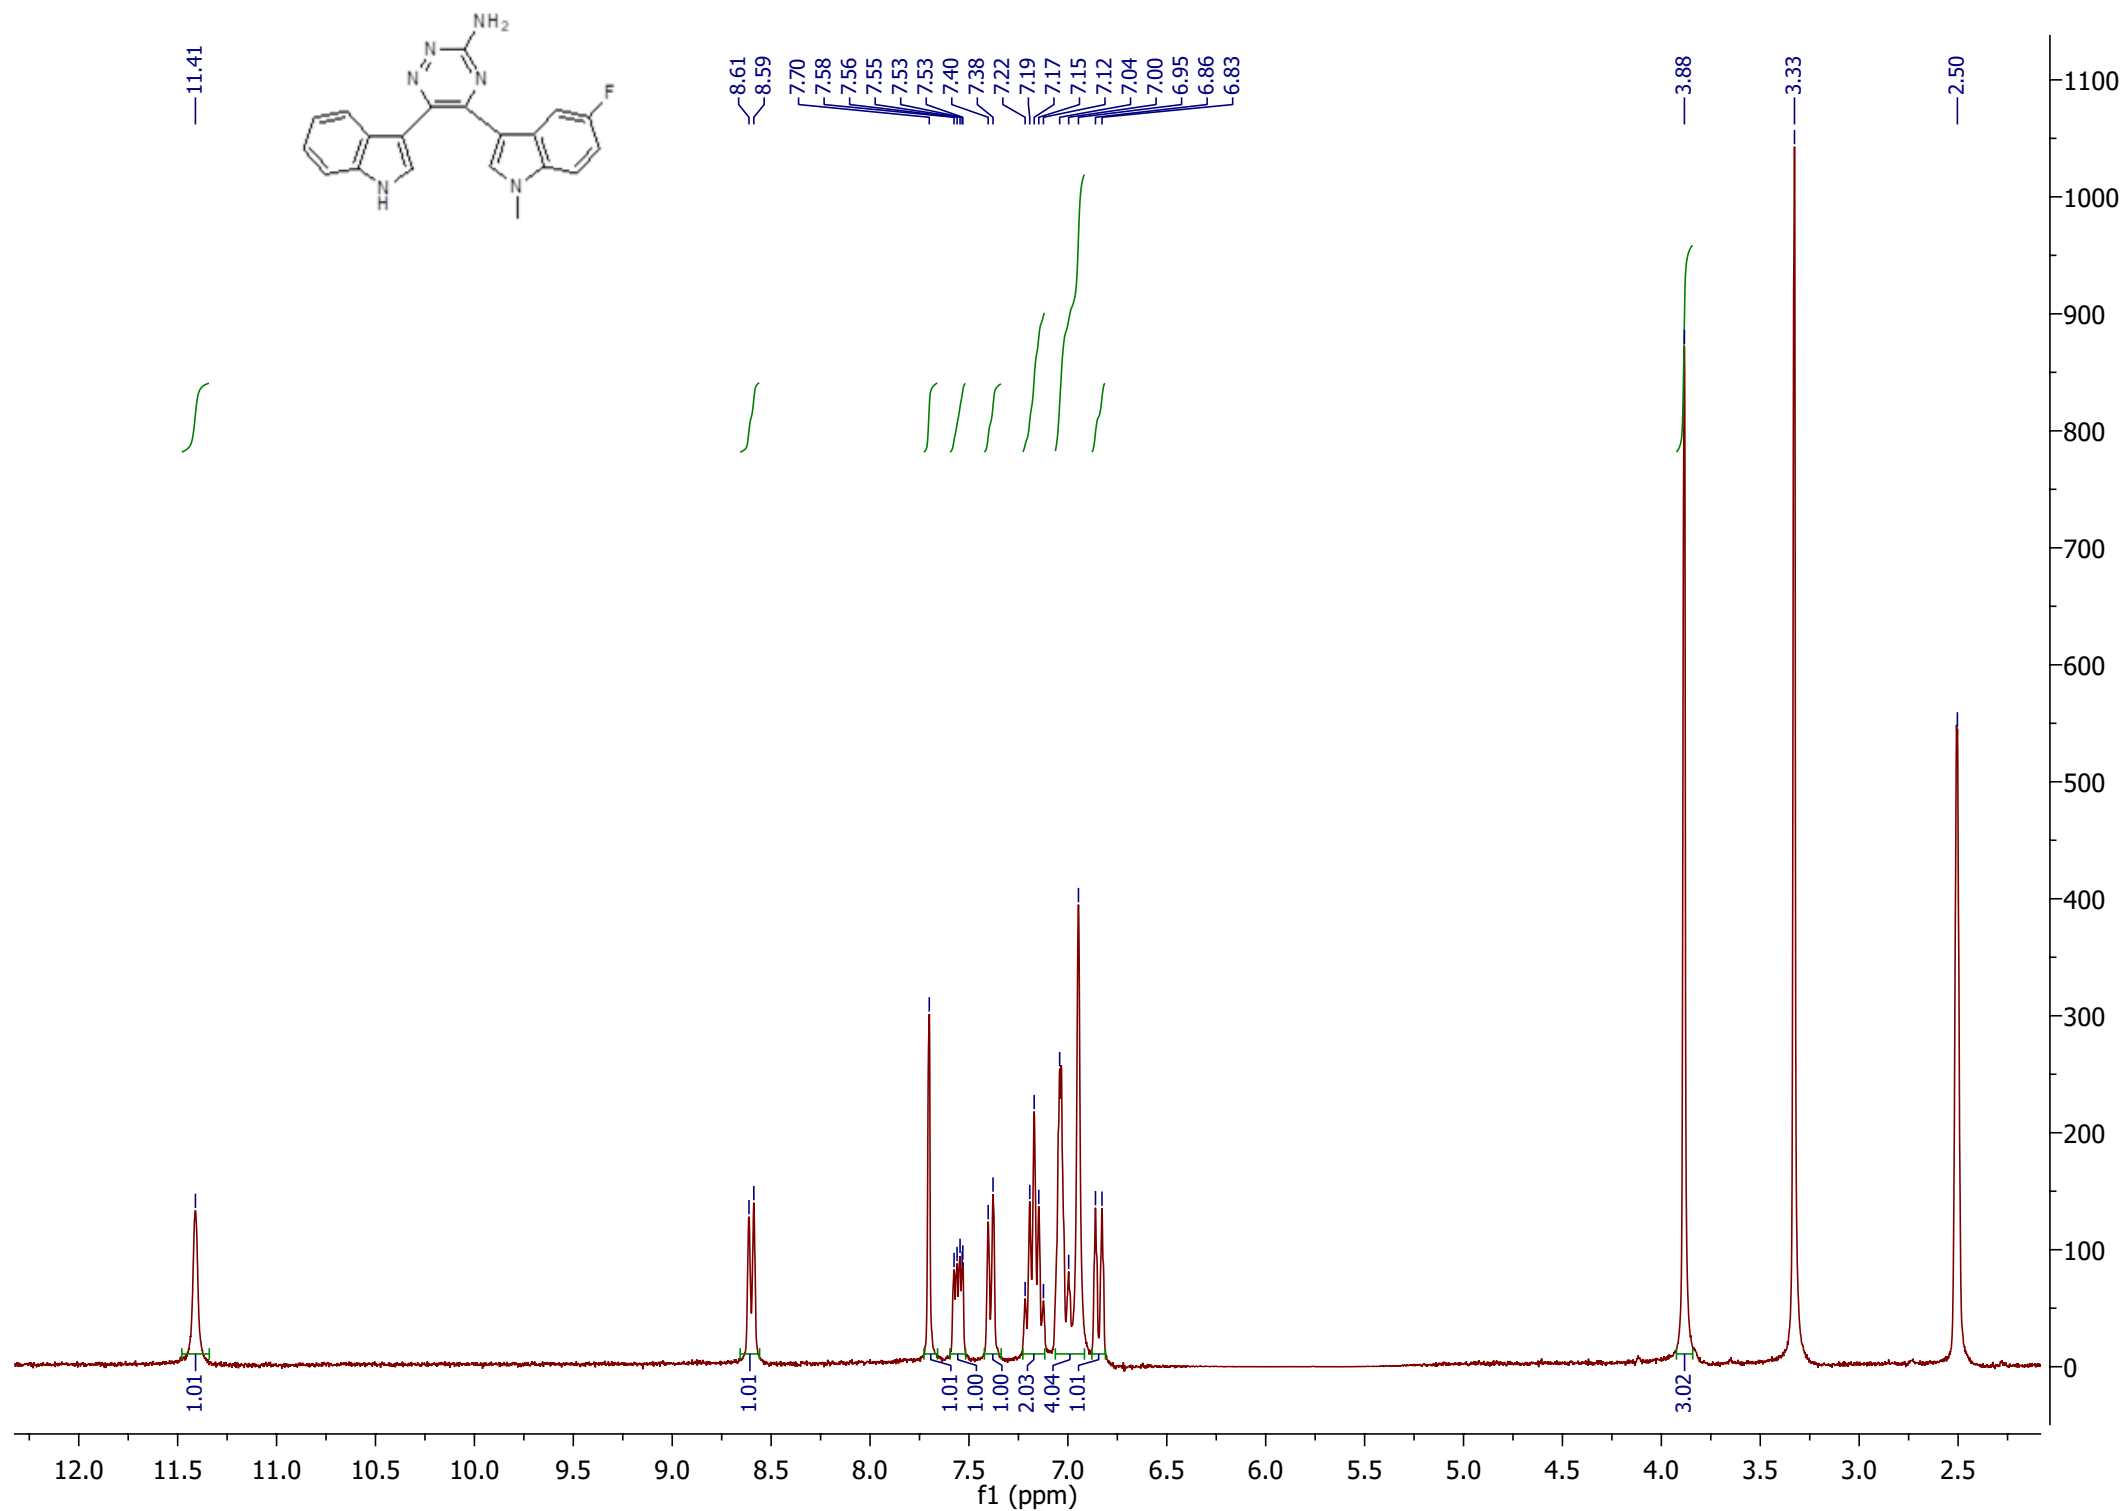

Figure S20:  $^1\text{H}$  NMR spectrum of compound **5n**

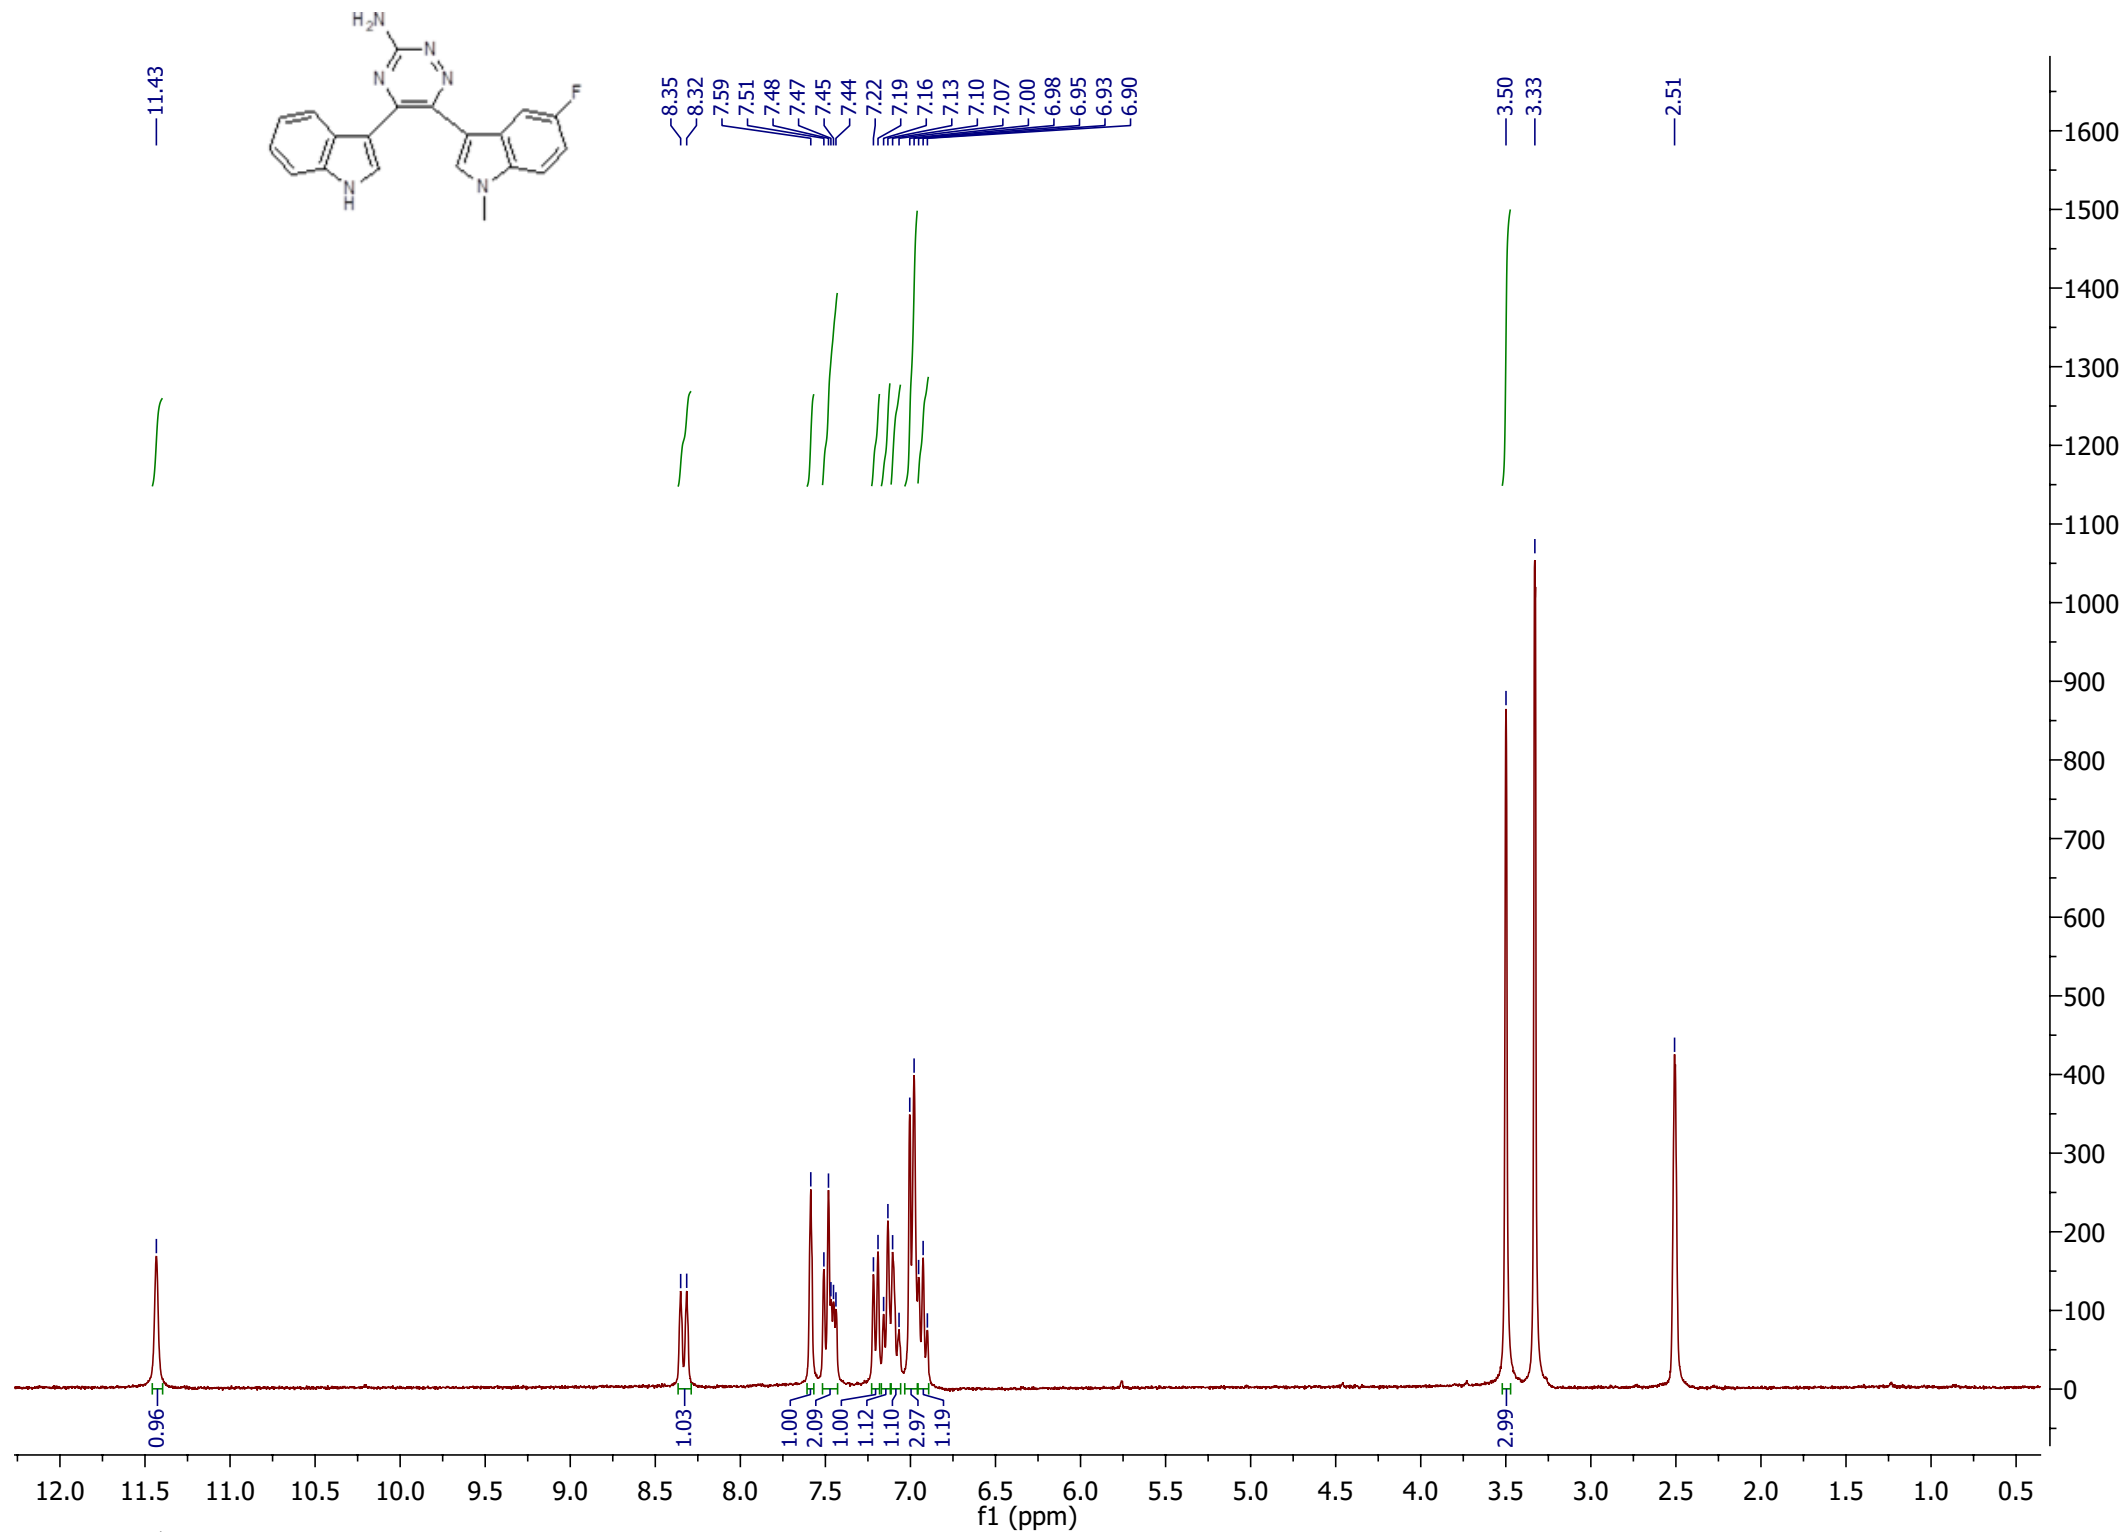

Figure S21: <sup>1</sup>H NMR spectrum of compound 6n

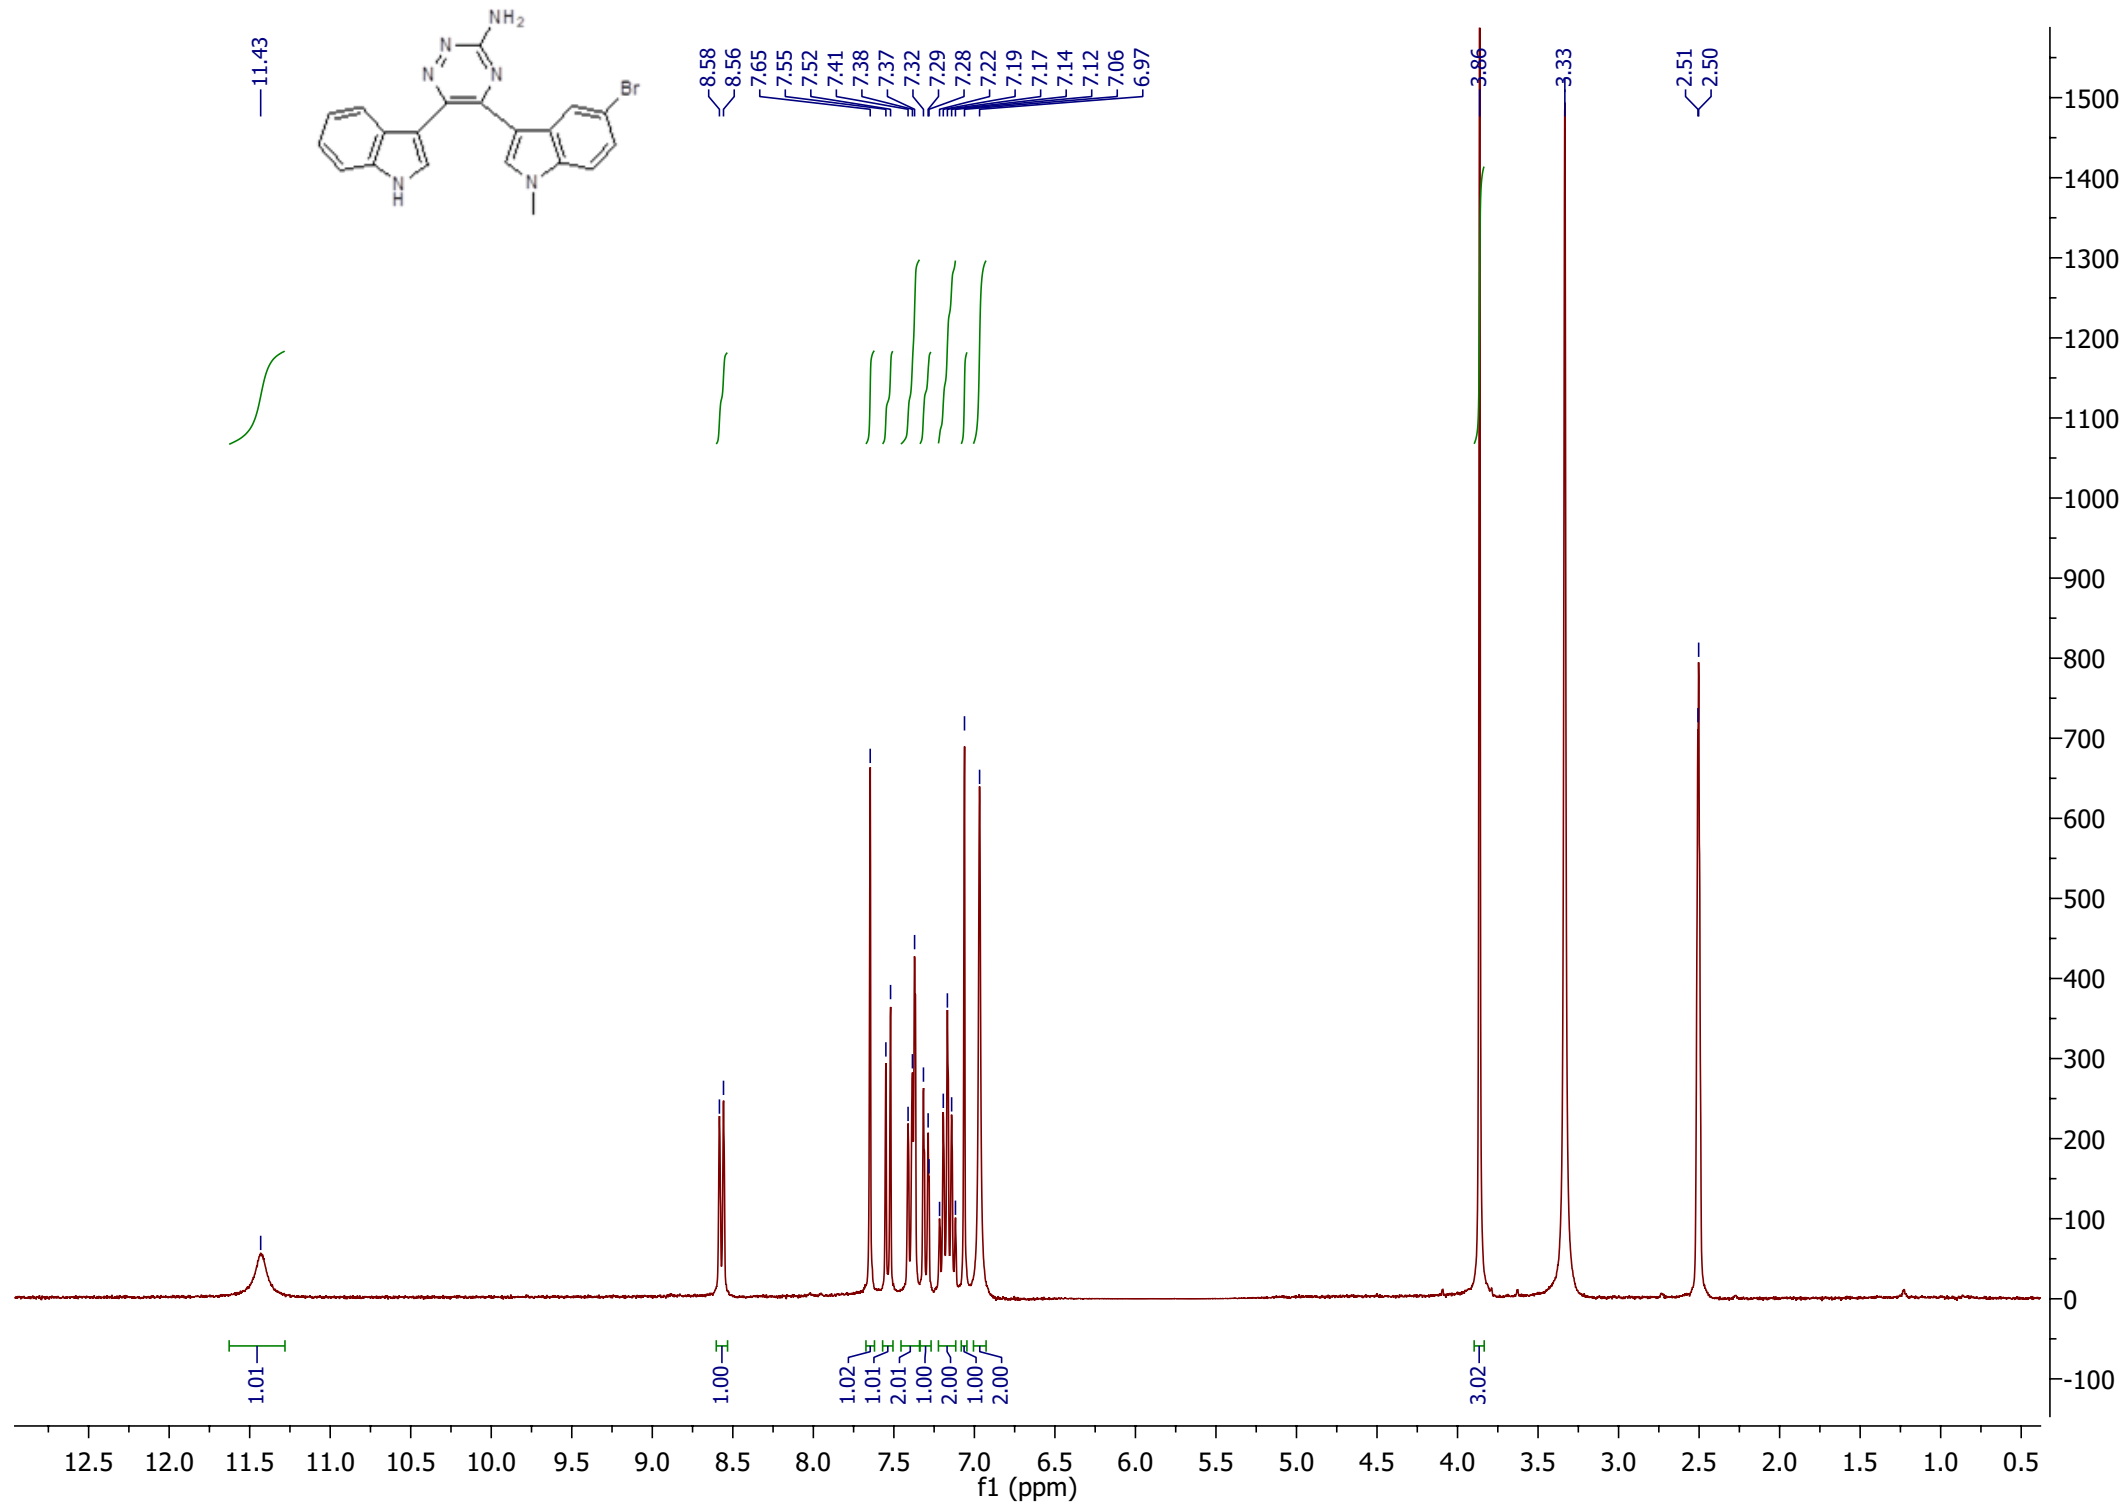

Figure S22: <sup>1</sup>H NMR spectrum of compound **5o**

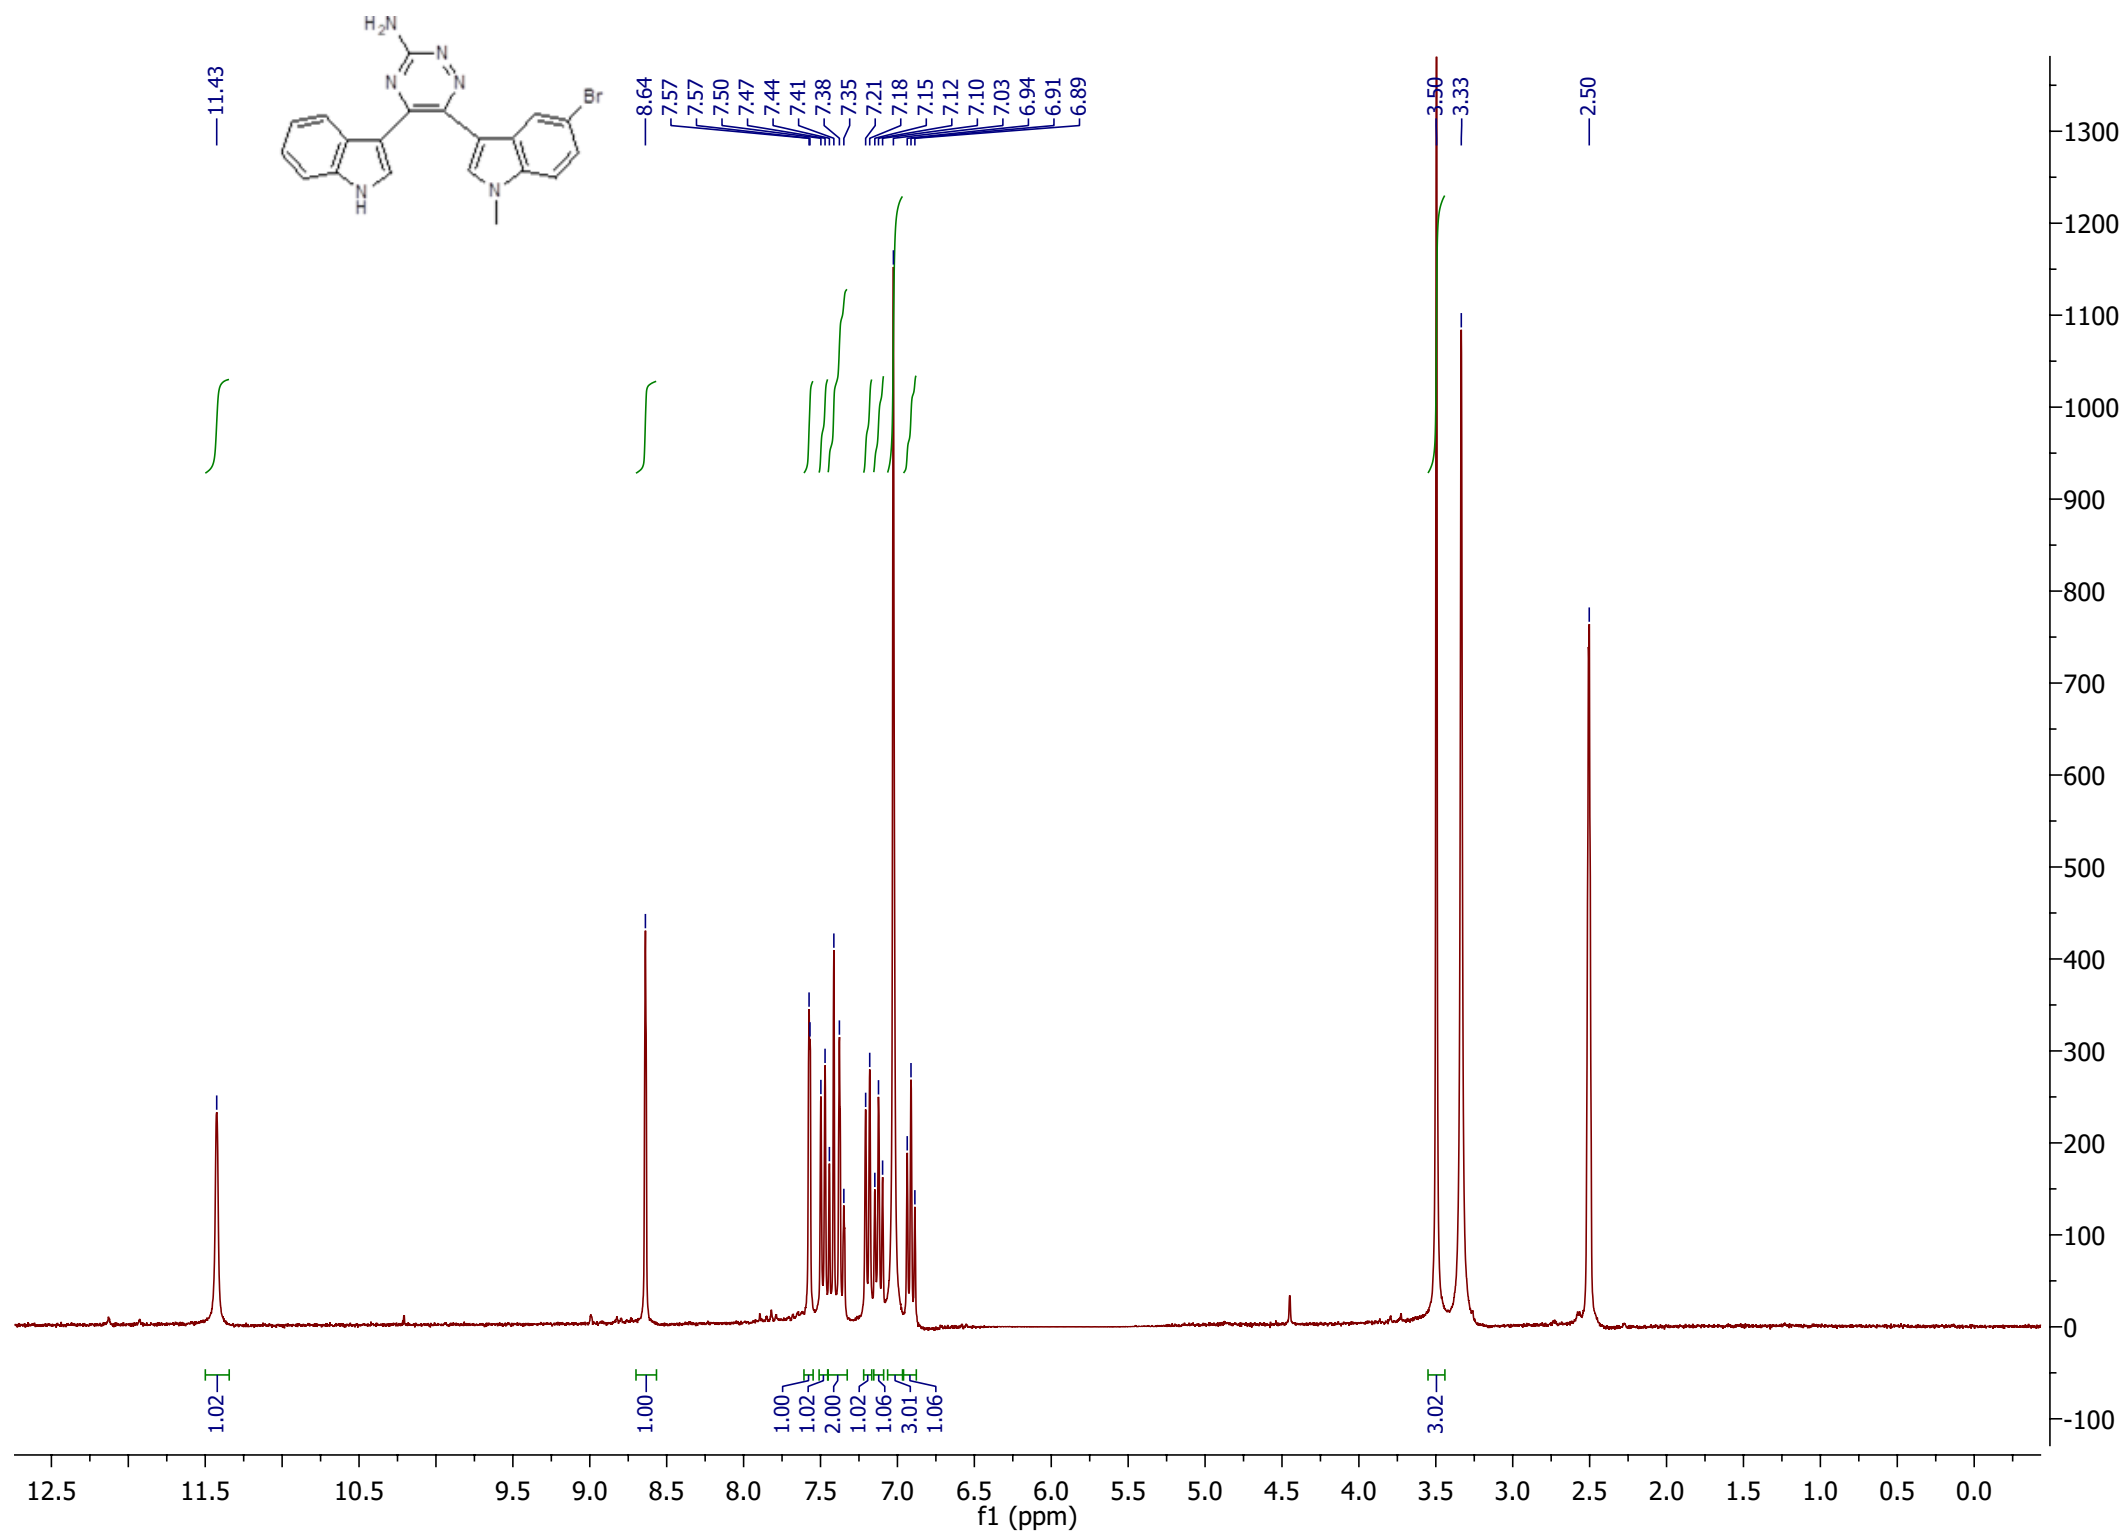

Figure S23:  $^1\text{H}$  NMR spectrum of compound **60**

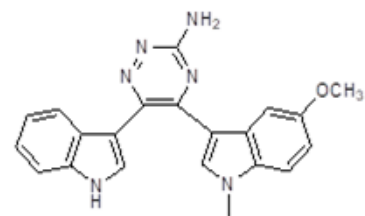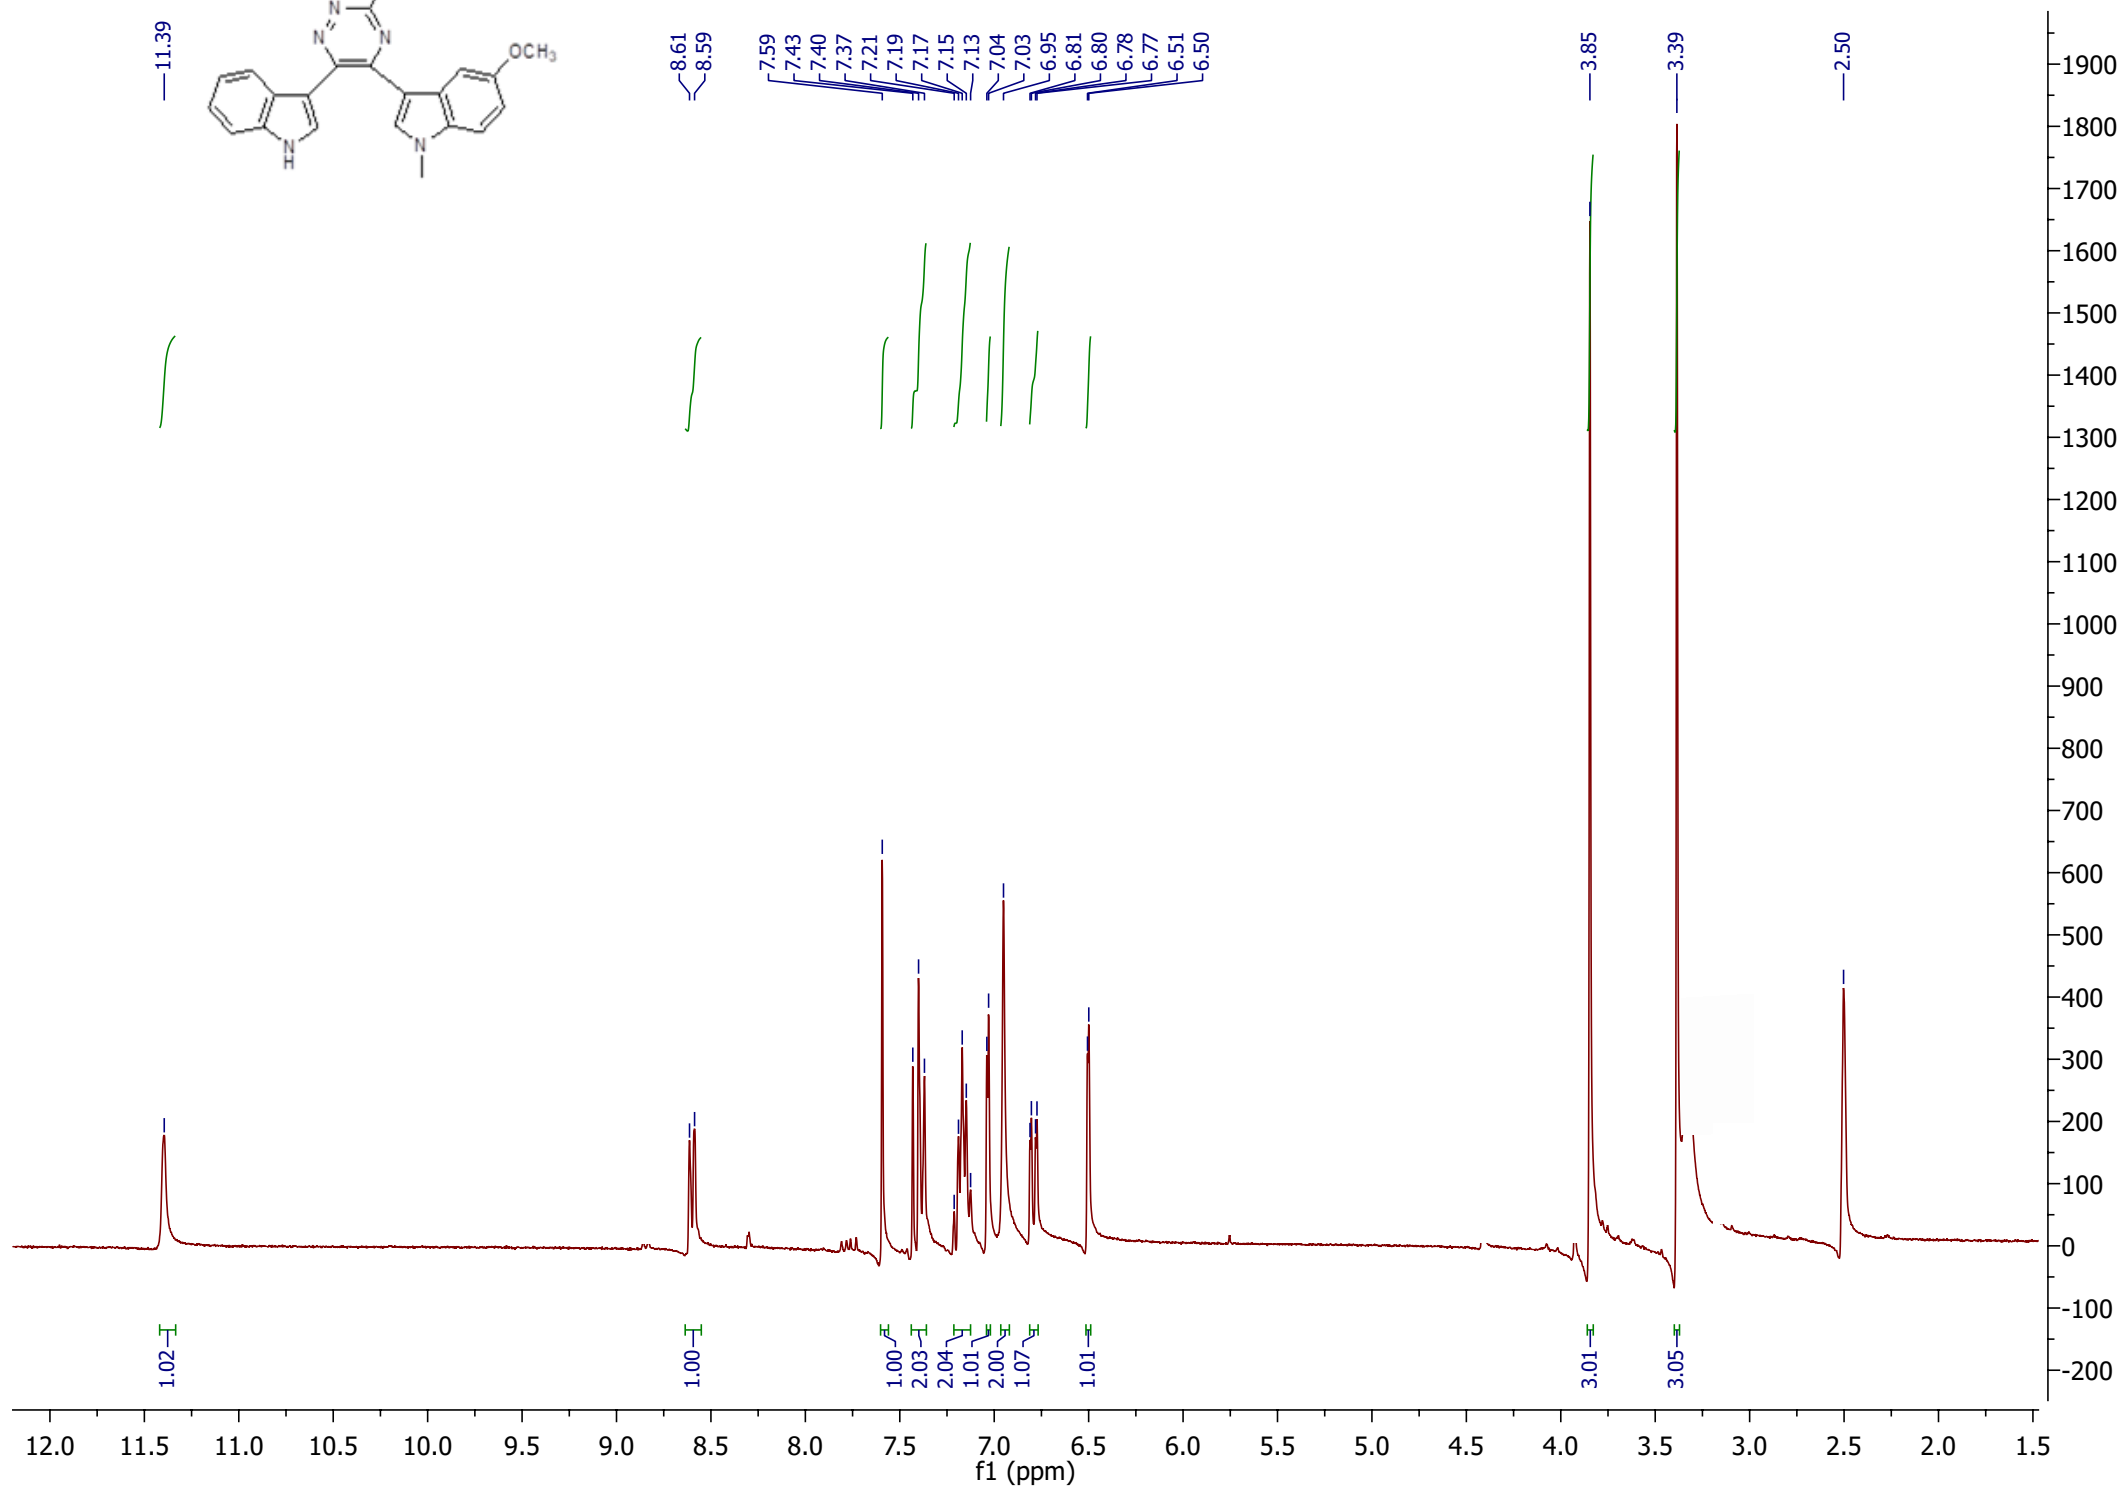

Figure S24: <sup>1</sup>H NMR spectrum of compound 5p

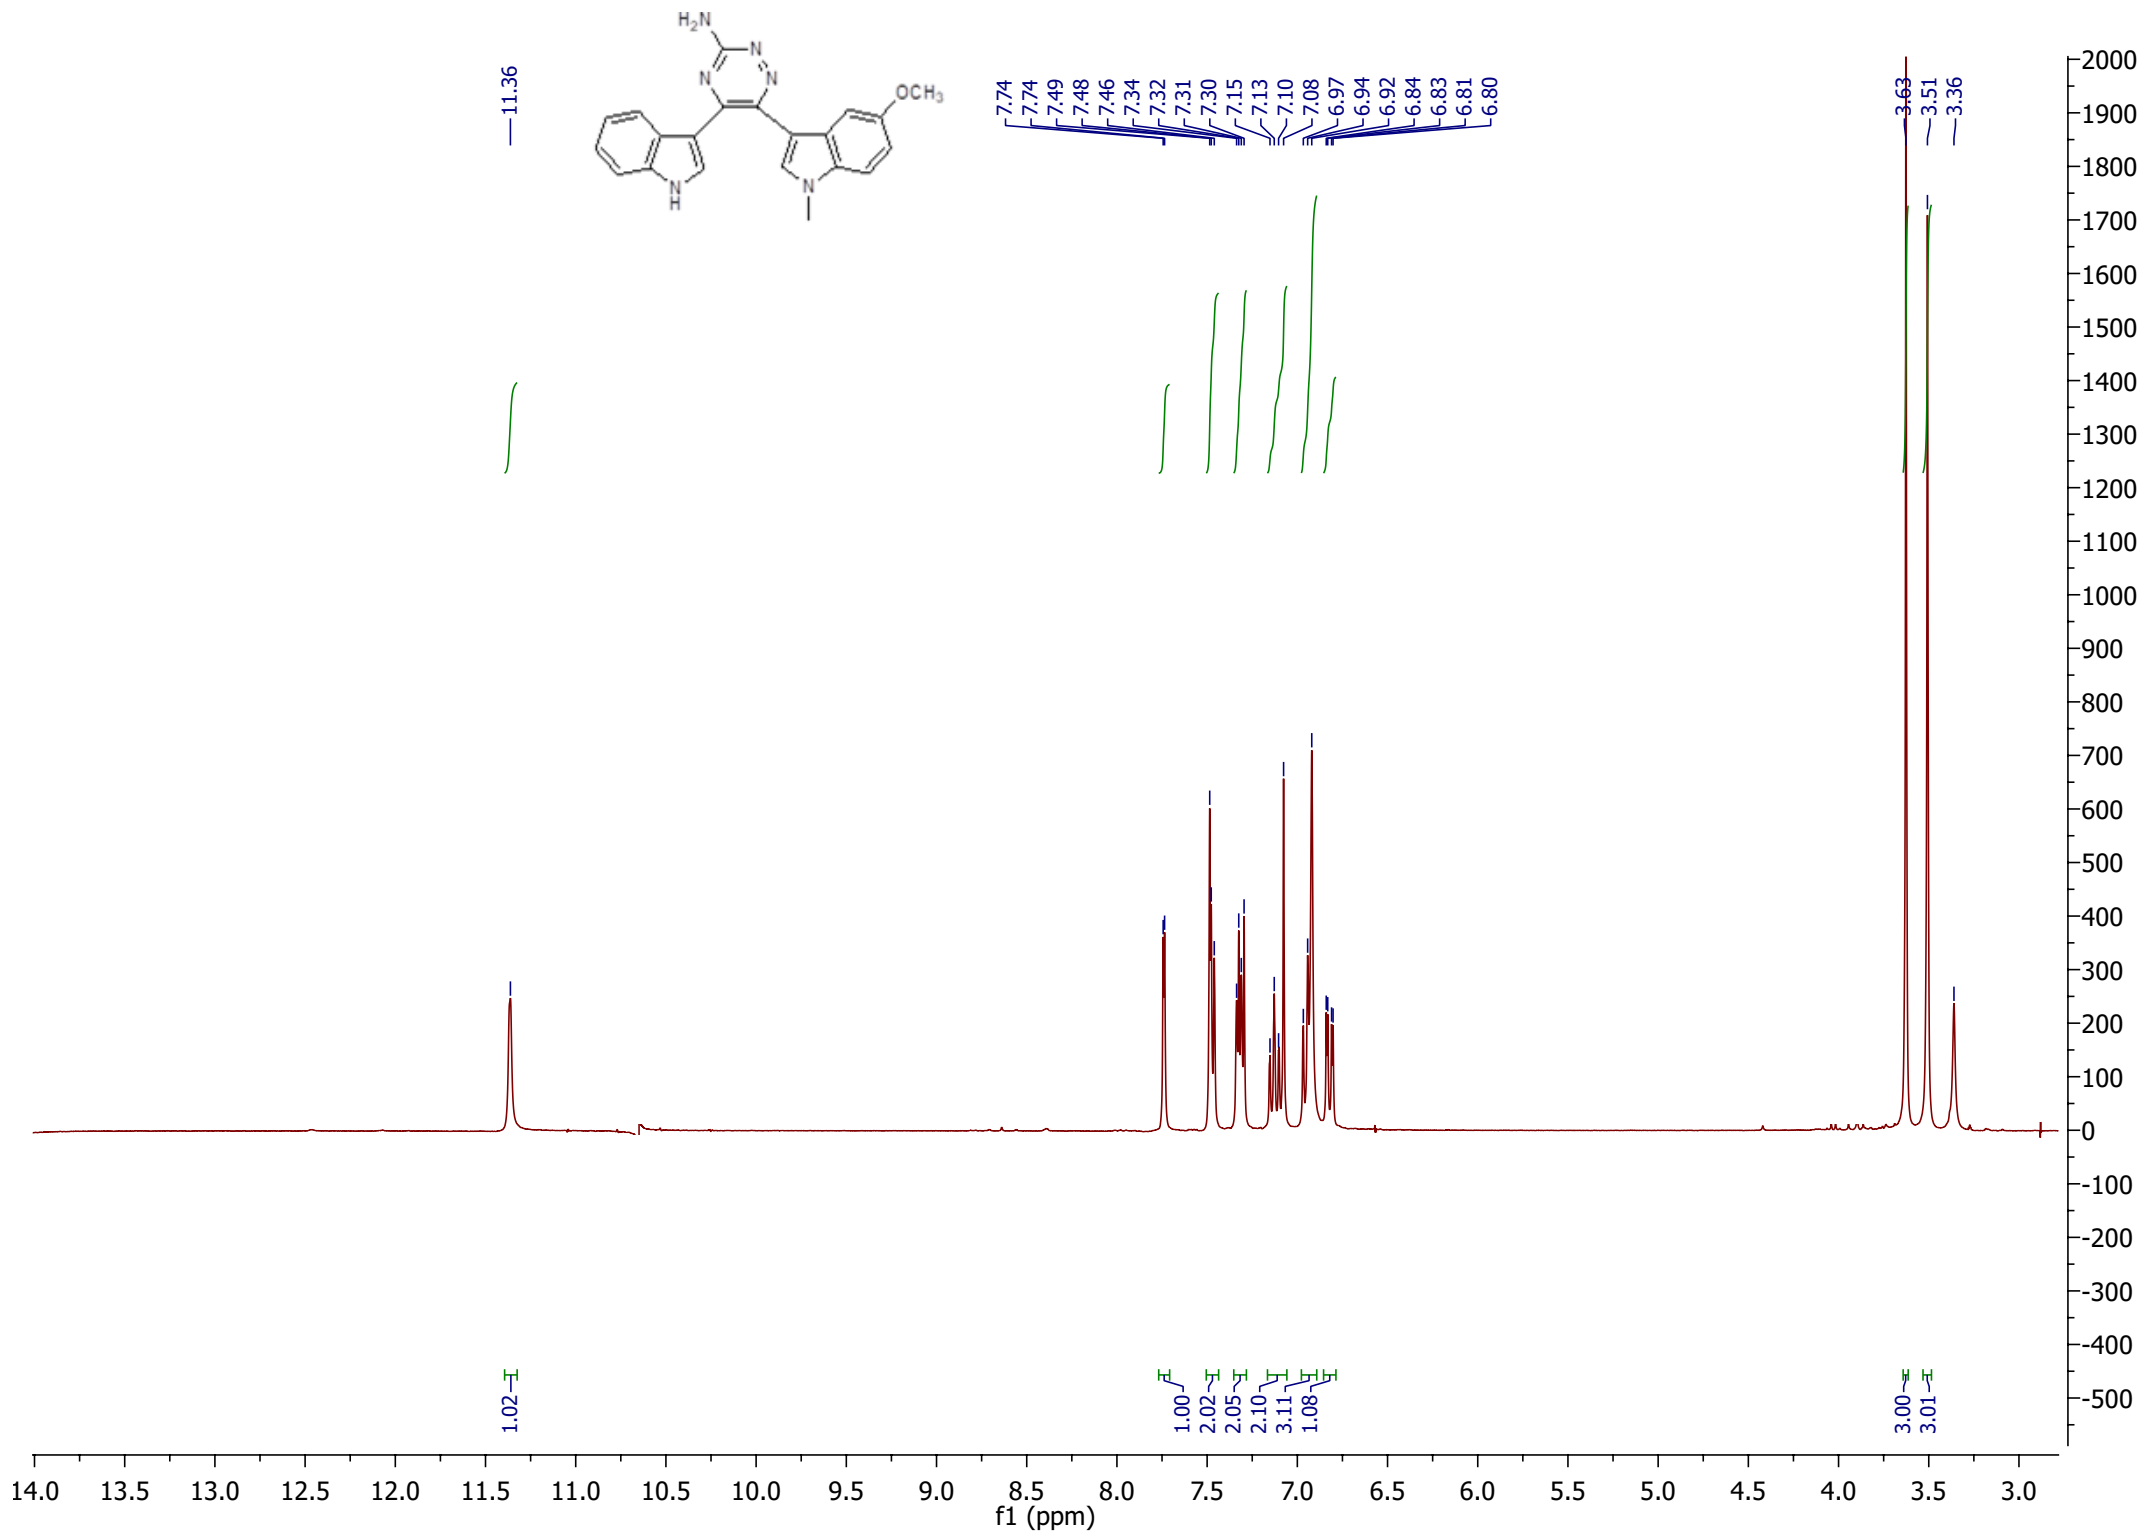

**Figure S25:** <sup>1</sup>H NMR spectrum of compound **6p**

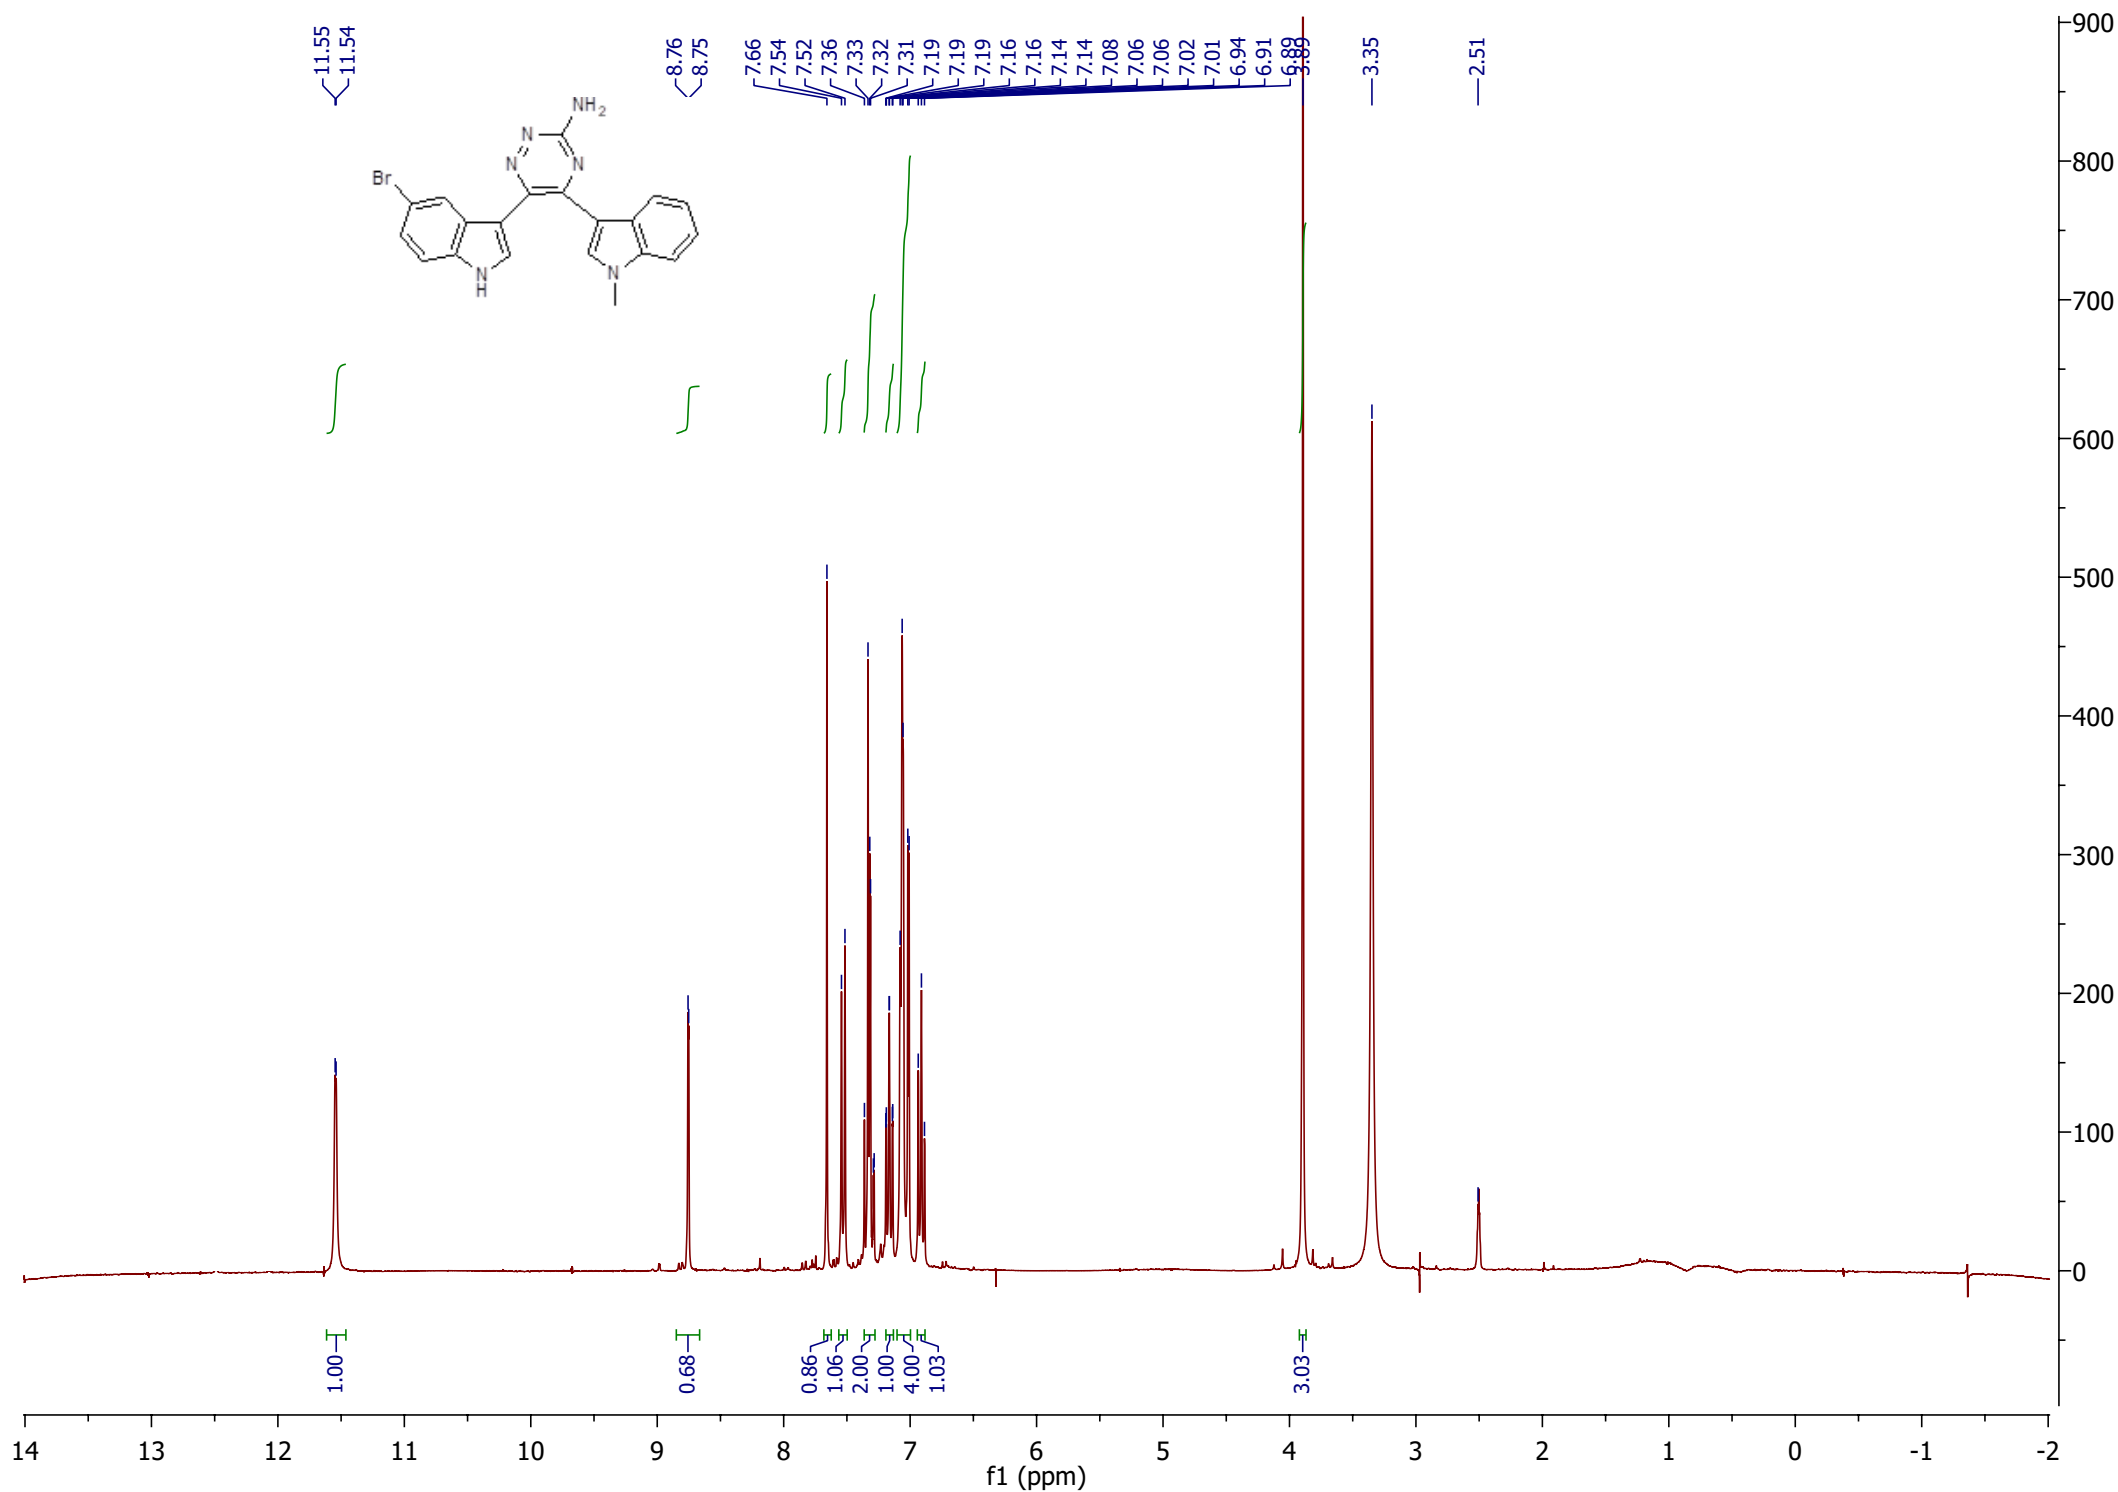

Figure S26: <sup>1</sup>H NMR spectrum of compound 5q



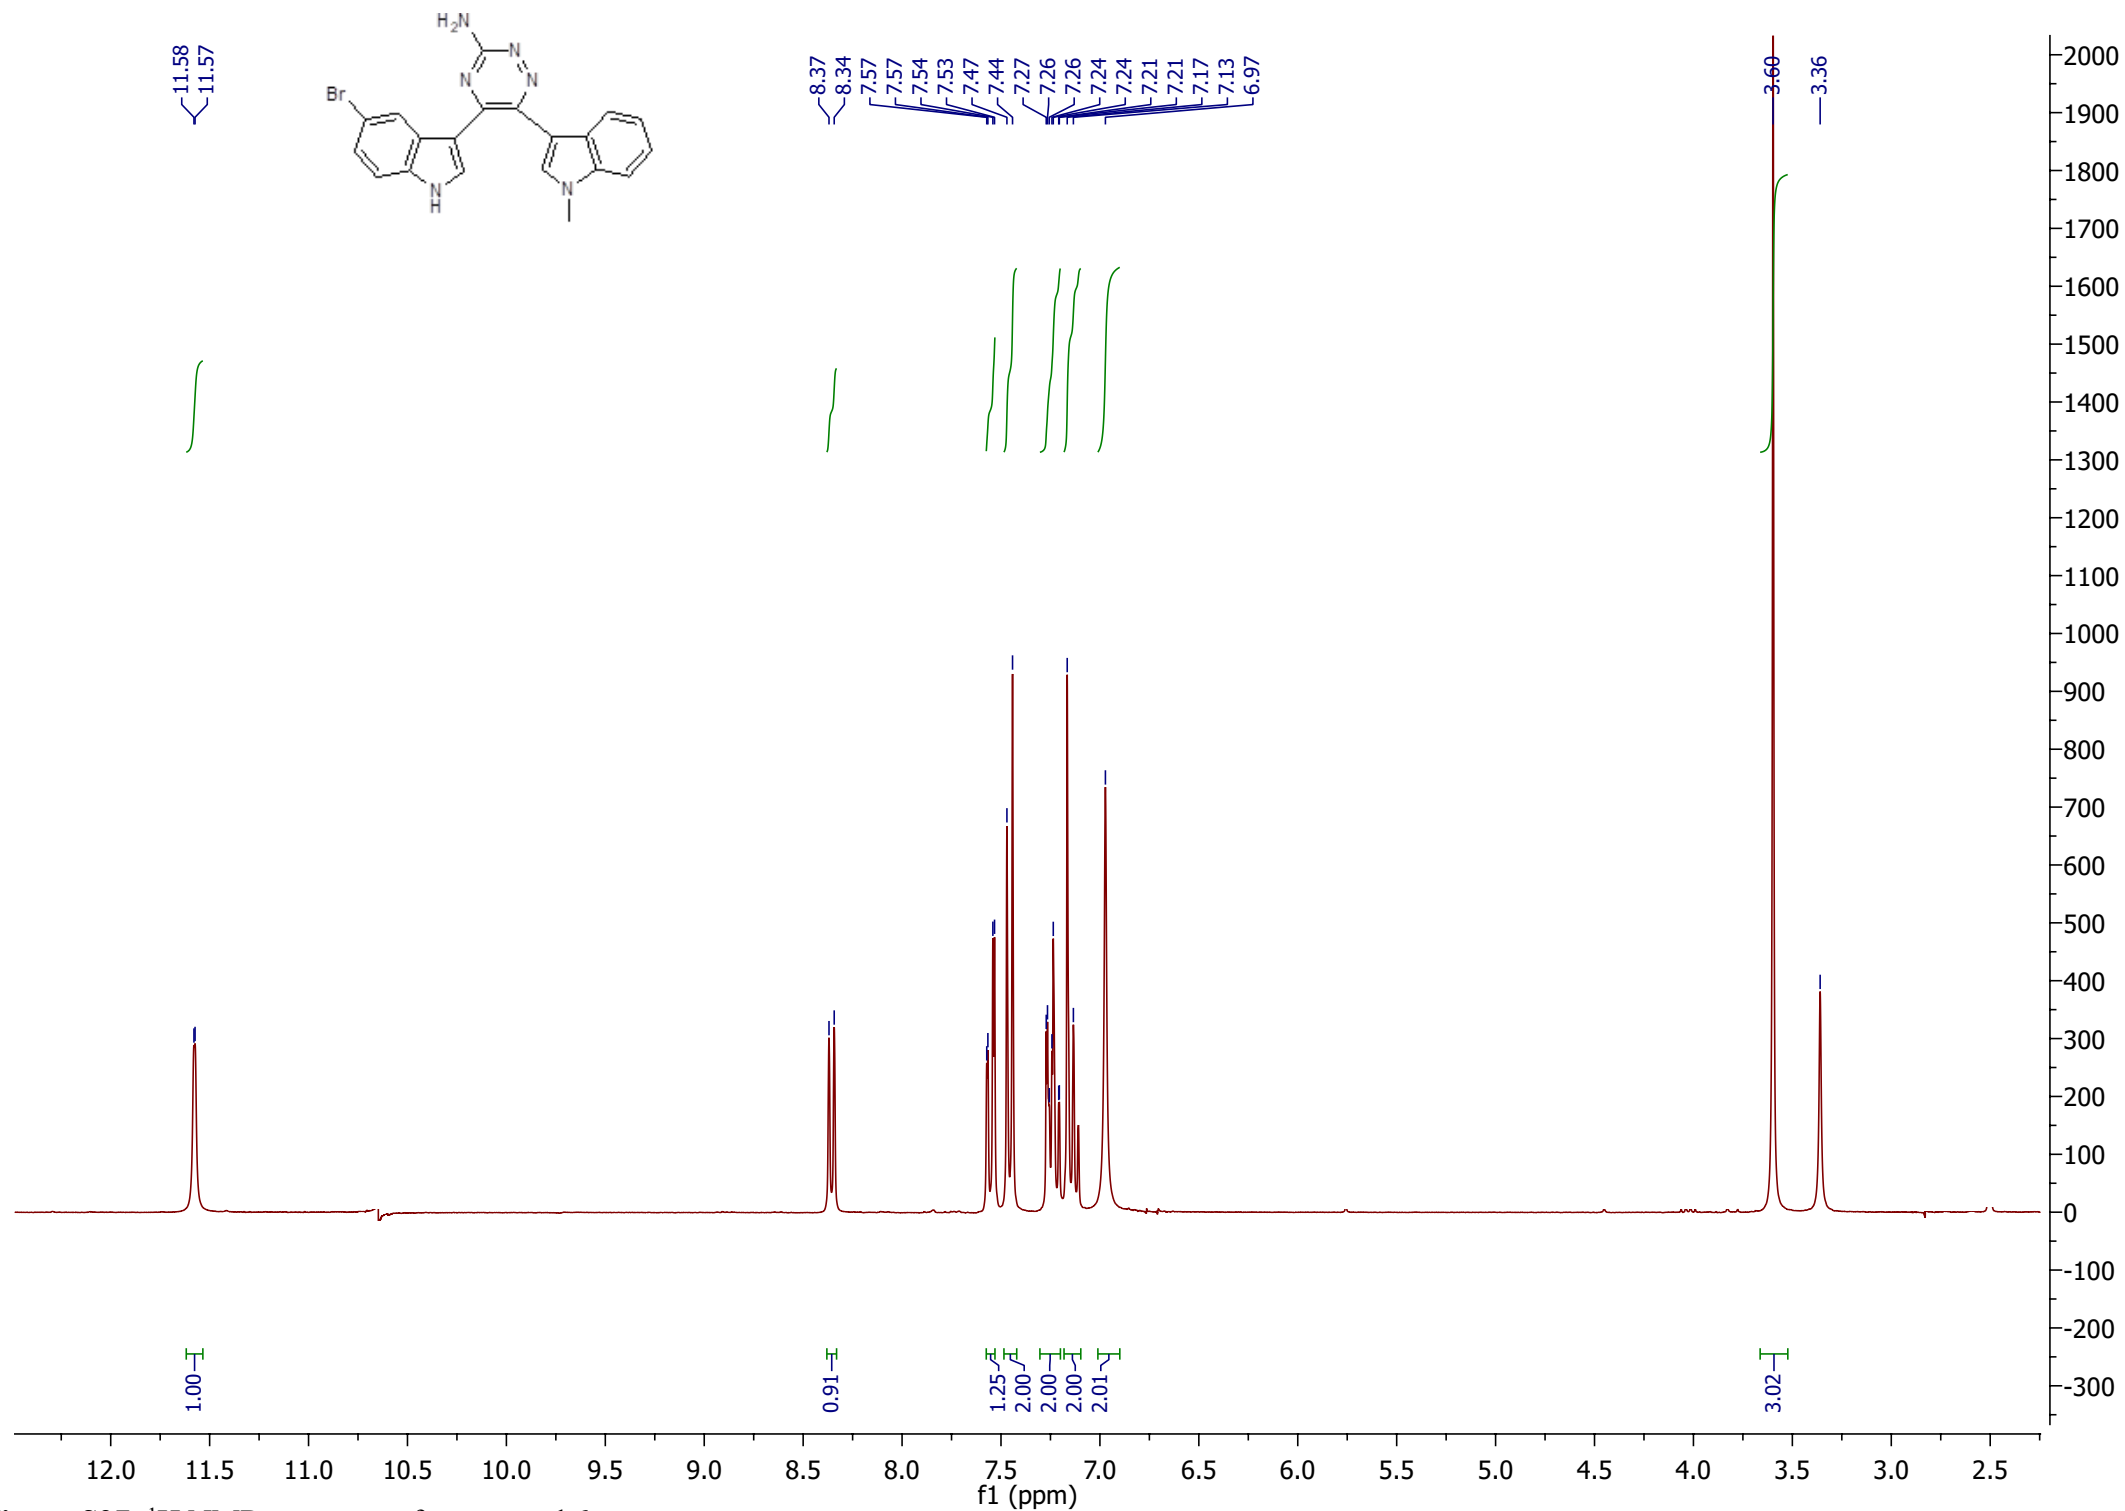

Figure S27: <sup>1</sup>H NMR spectrum of compound 6q

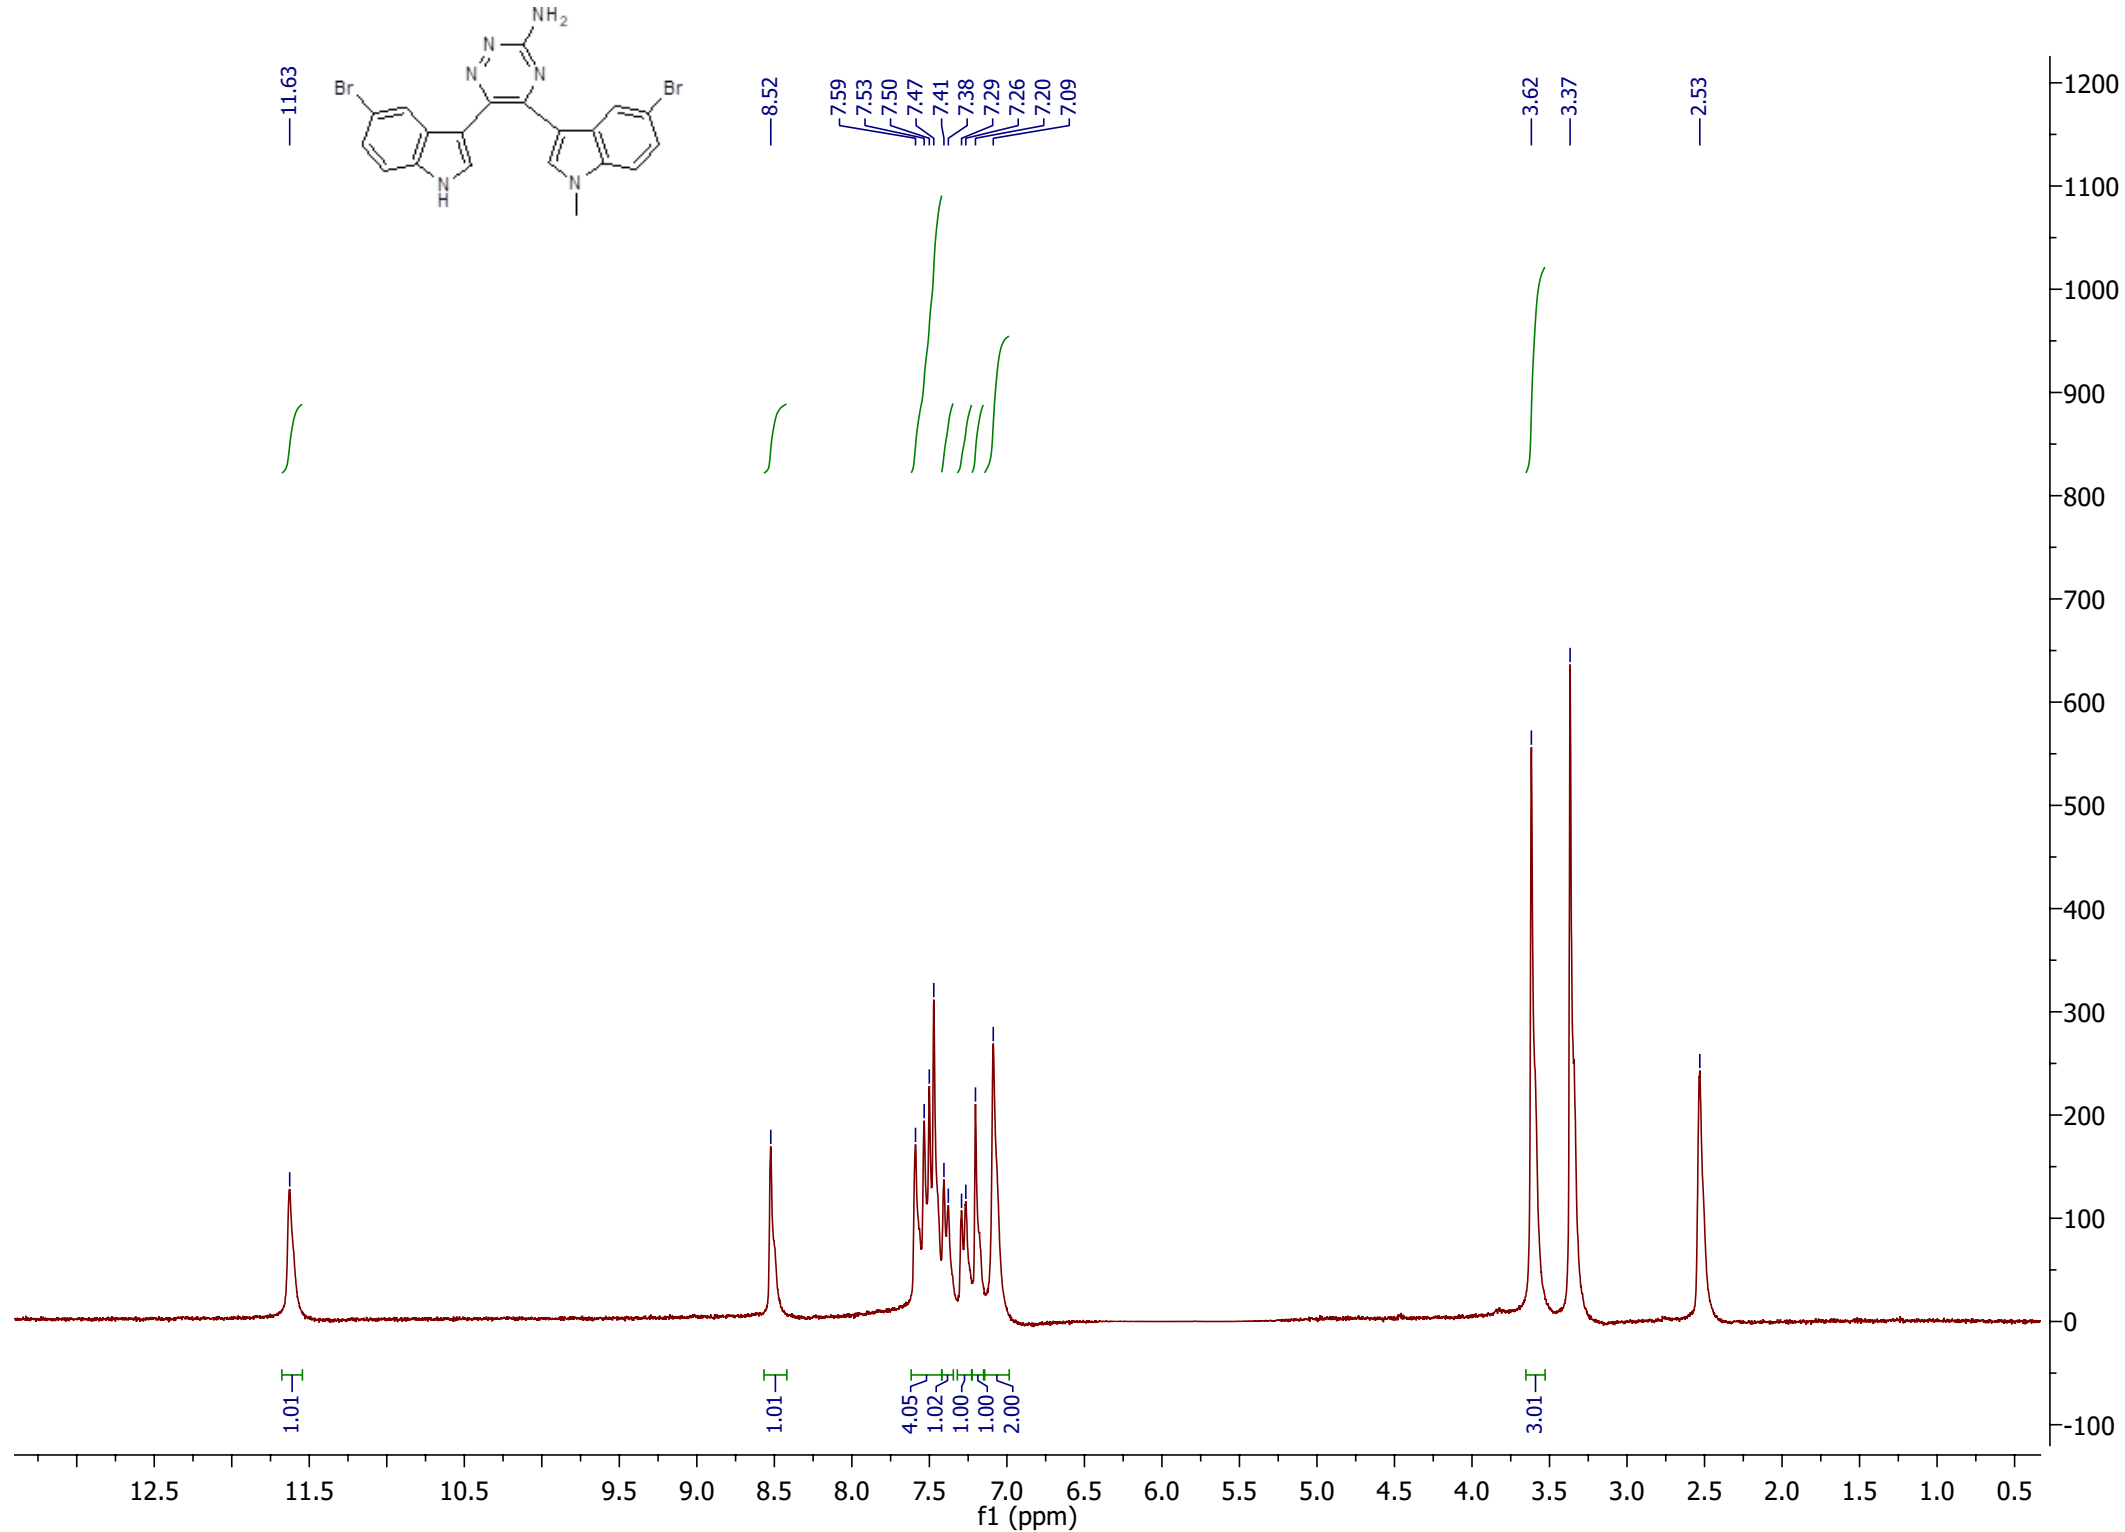

Figure S28:  $^1\text{H}$  NMR spectrum of compound **5r**

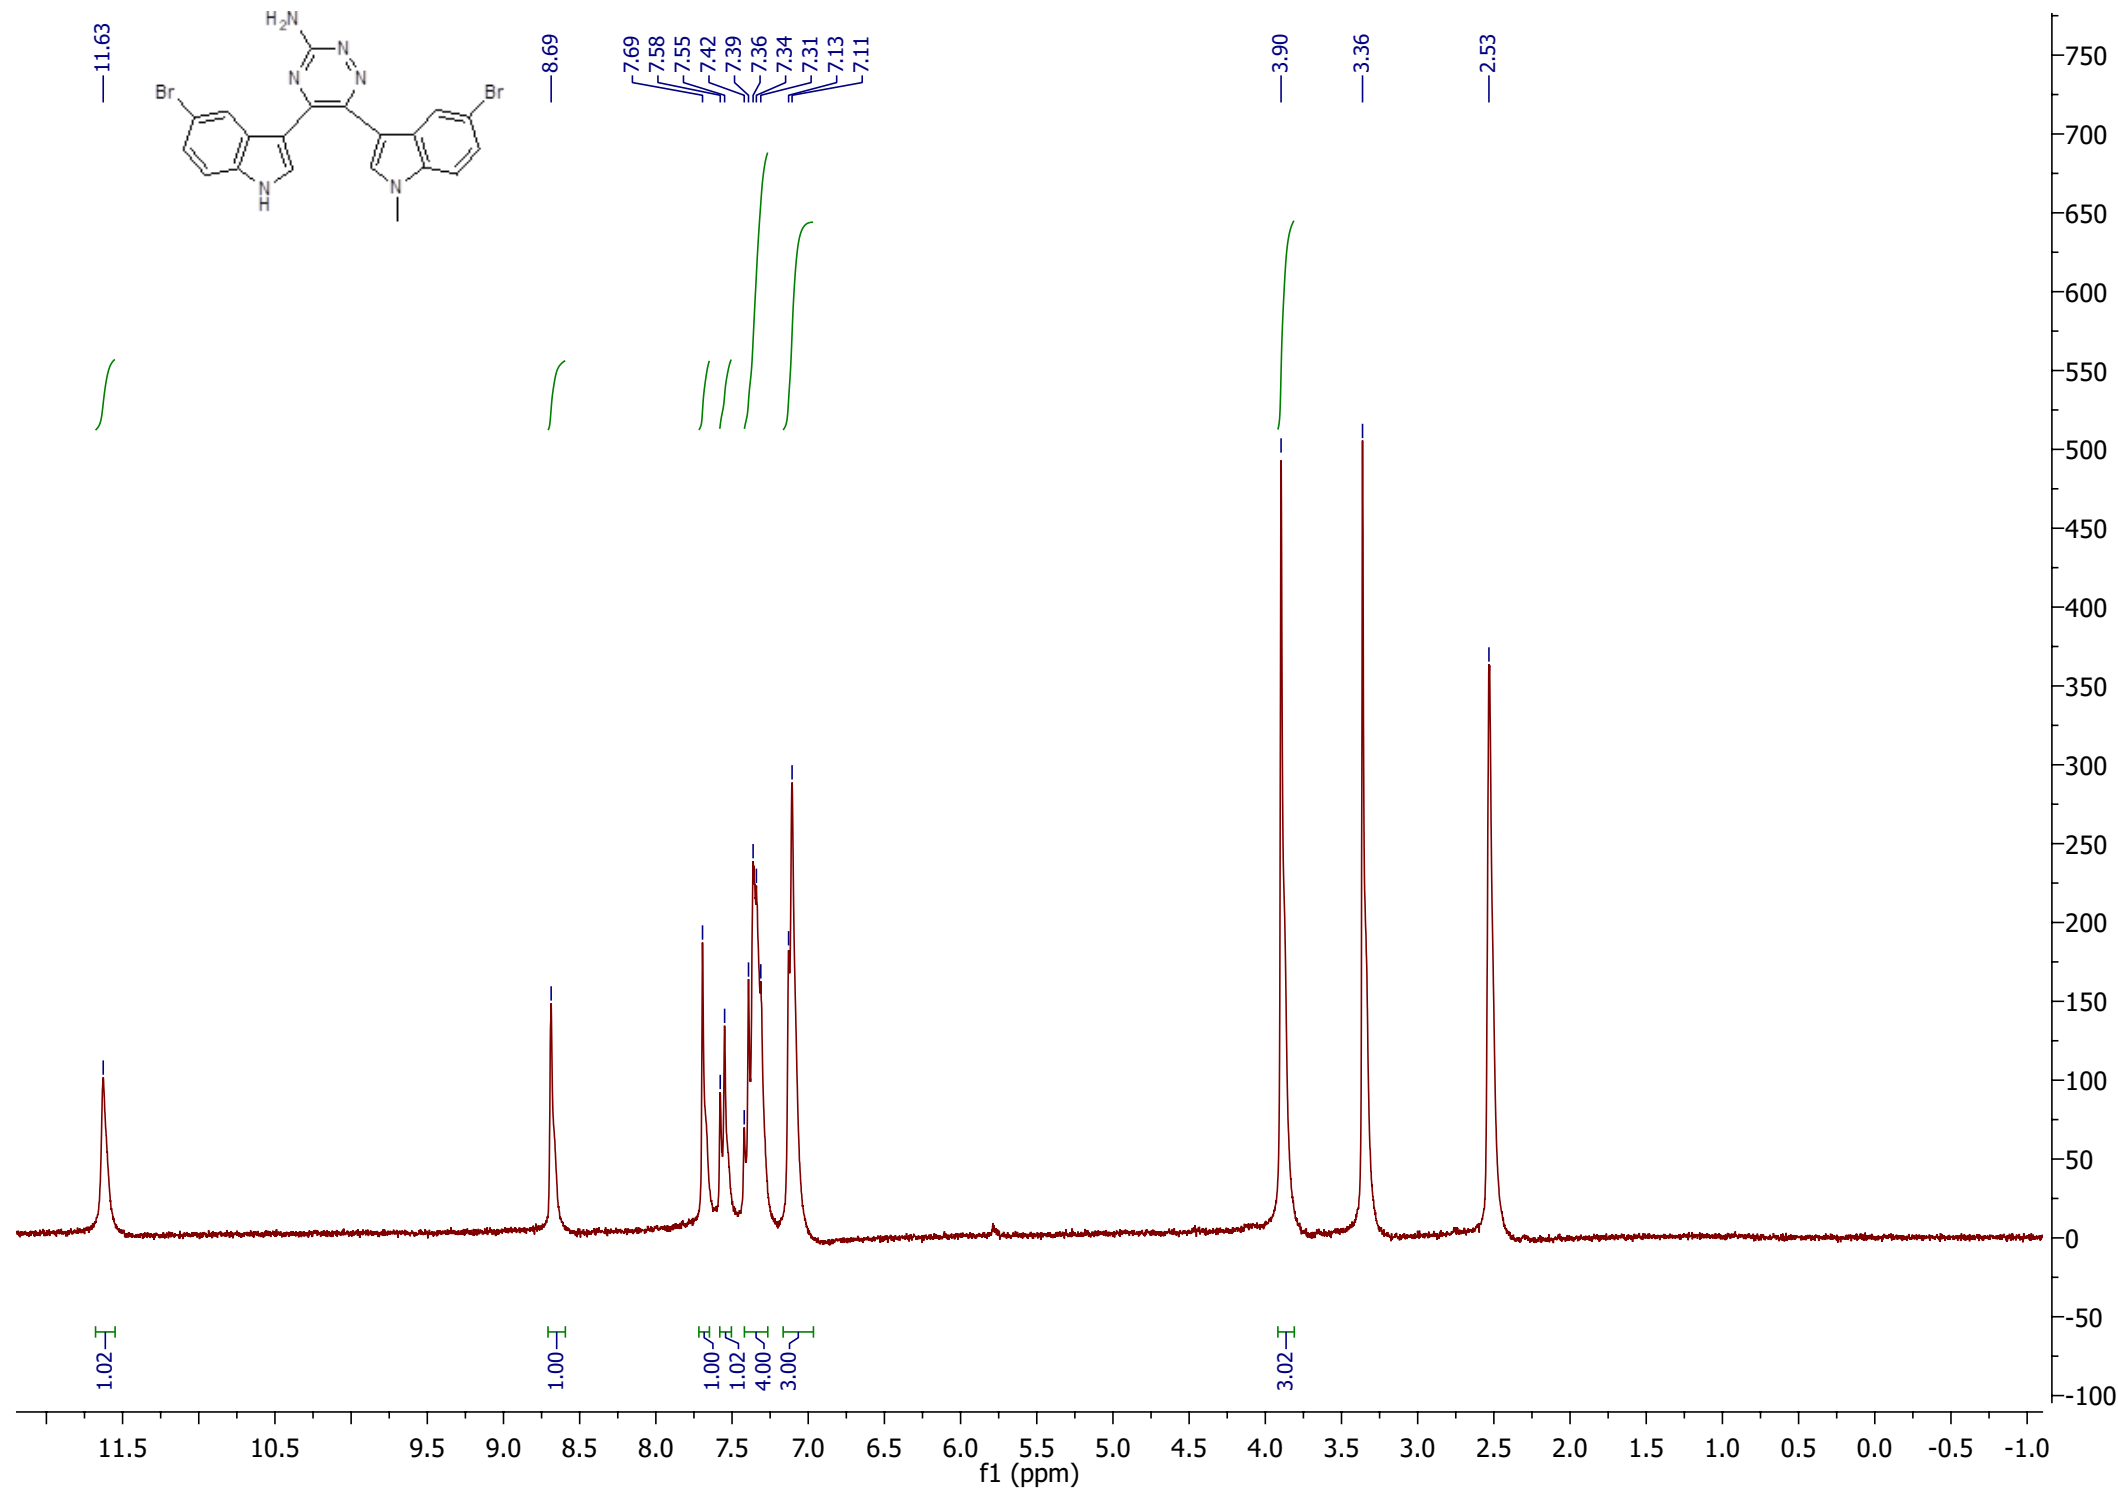

**Figure S29:**  $^1\text{H}$  NMR spectrum of compound **6r**

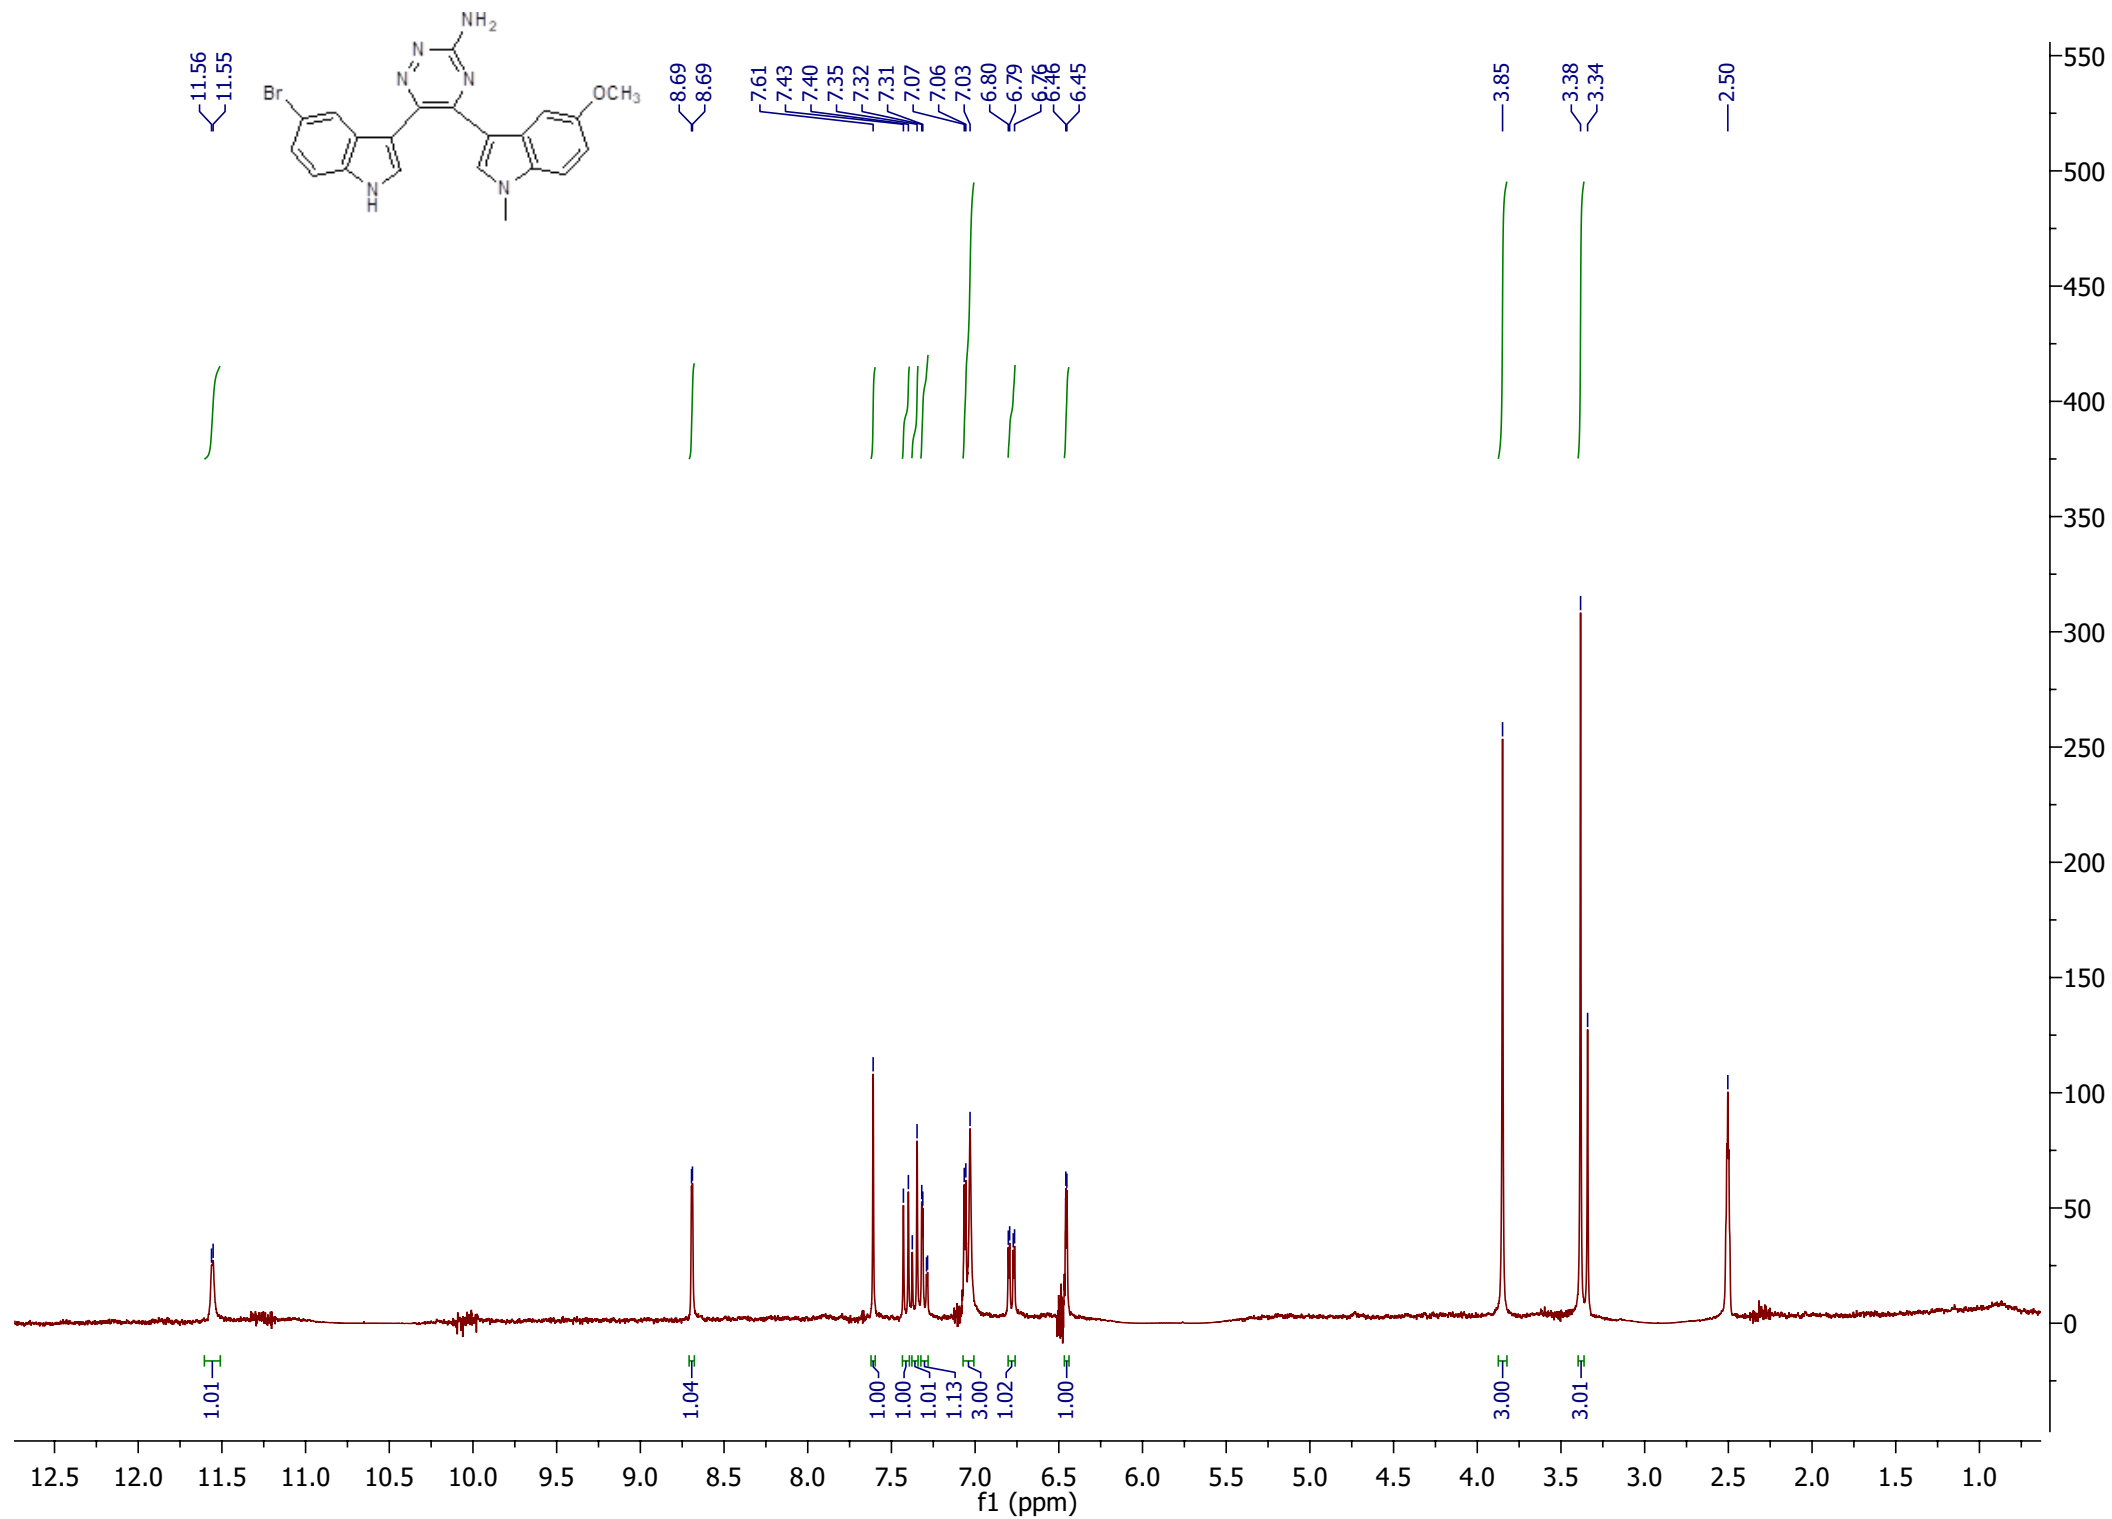

**Figure S30:** <sup>1</sup>H NMR spectrum of compound **5s**

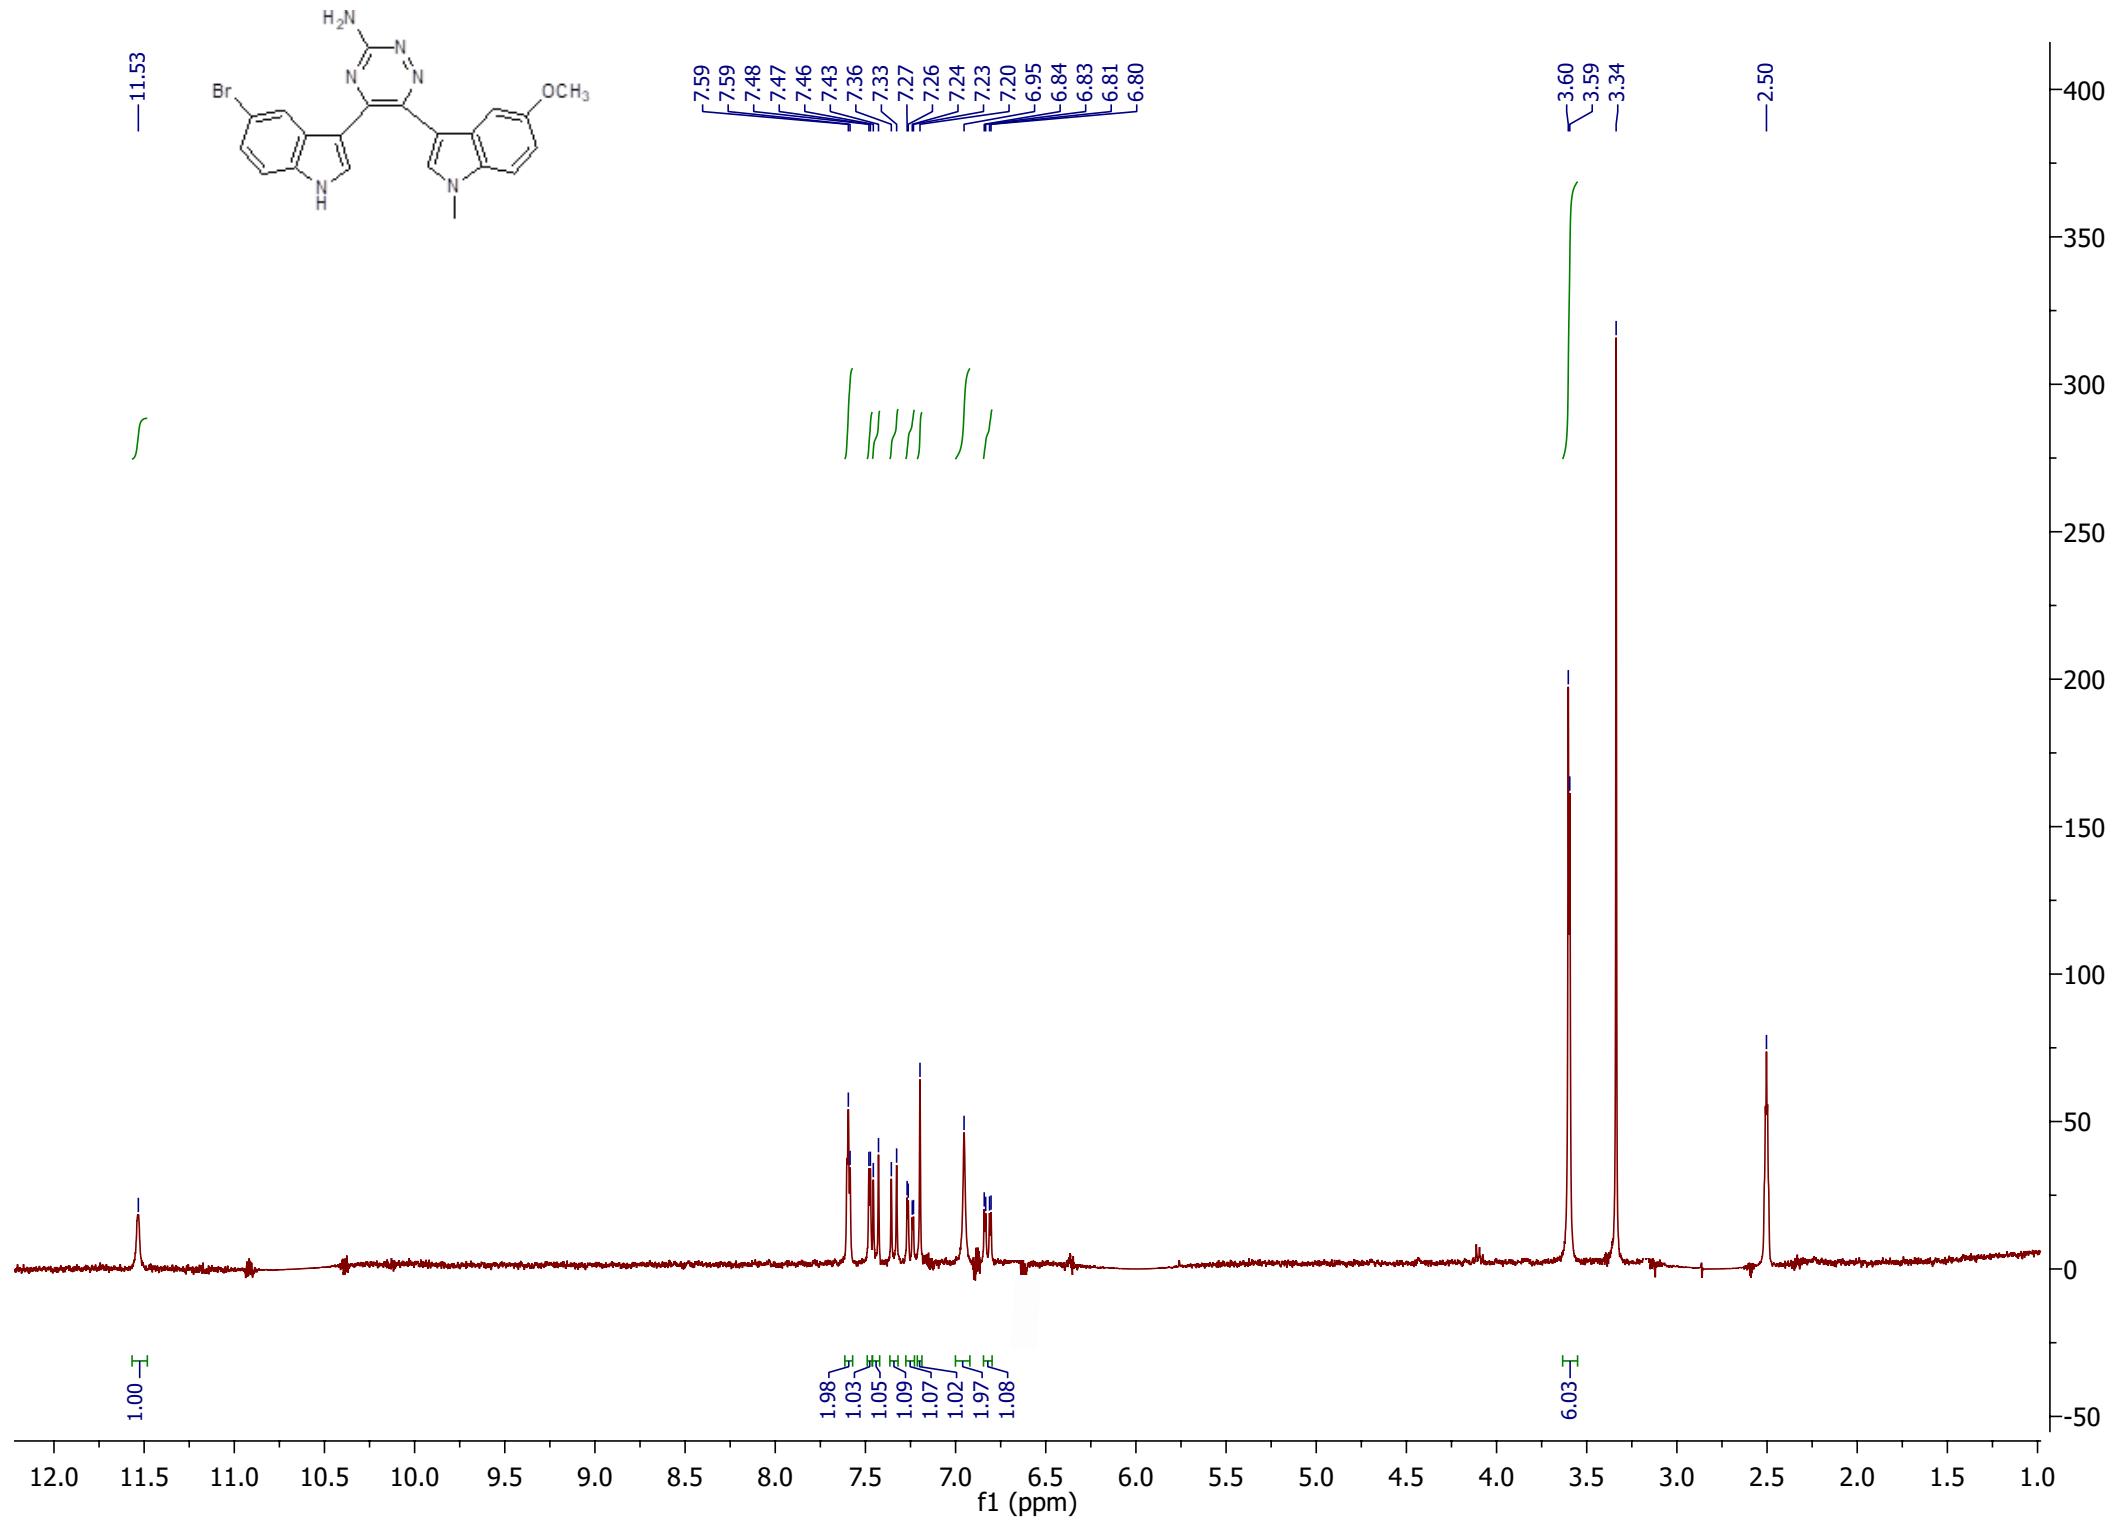

Figure S31:  $^1\text{H}$  NMR spectrum of compound **6s**

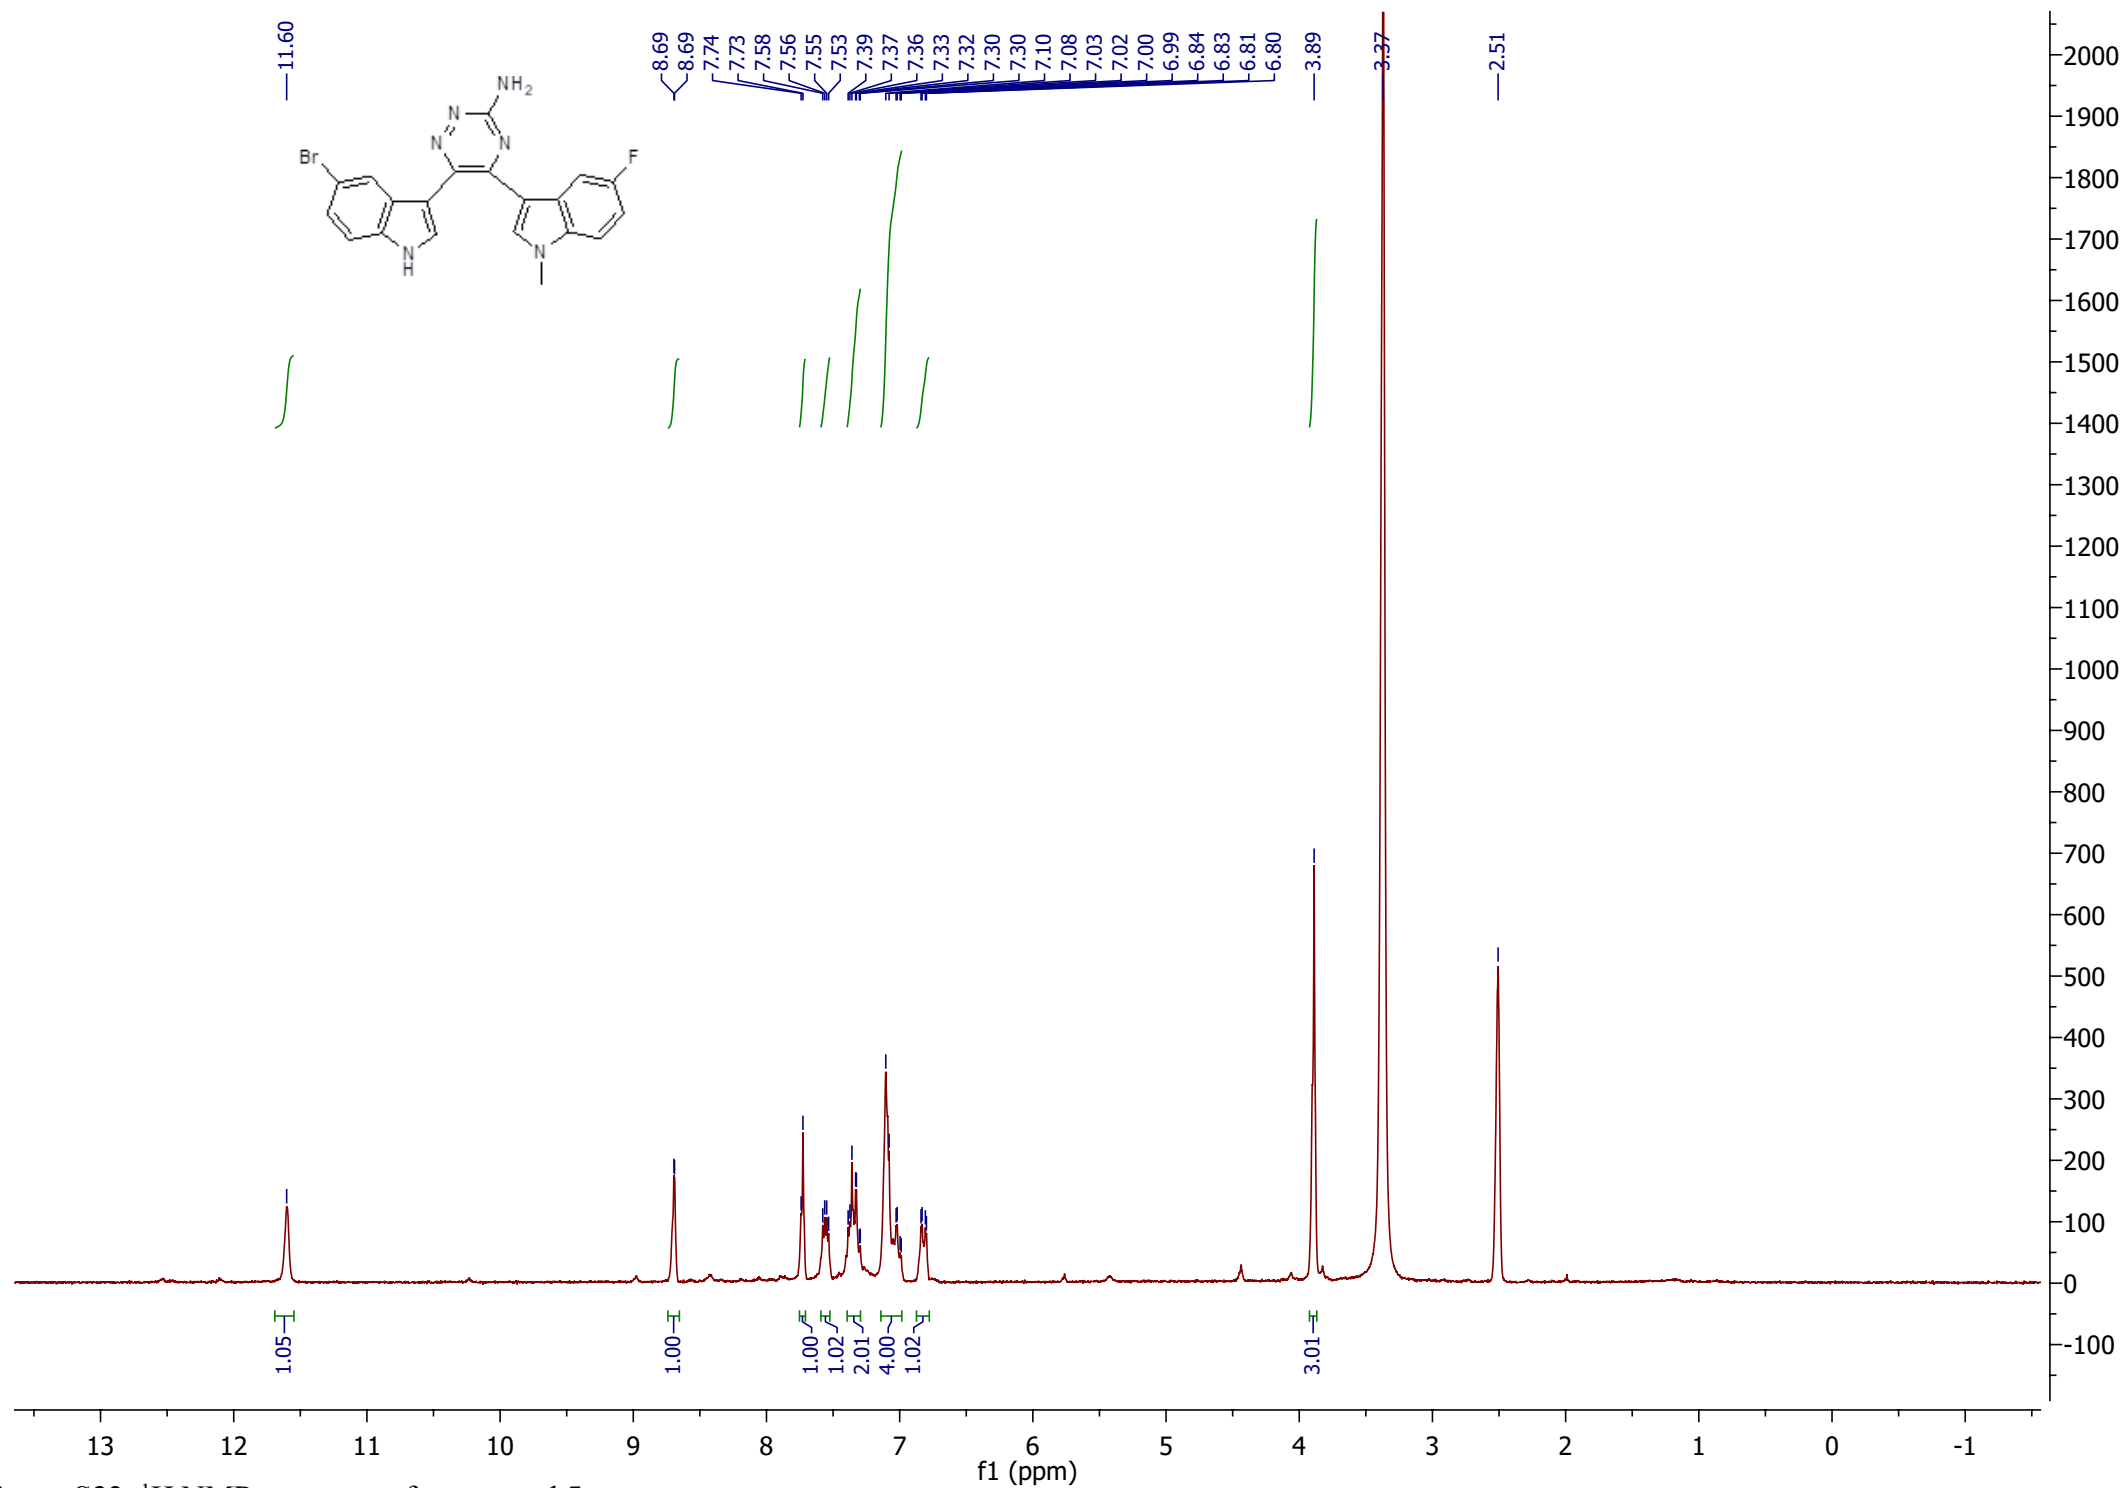

Figure S32: <sup>1</sup>H NMR spectrum of compound 5t

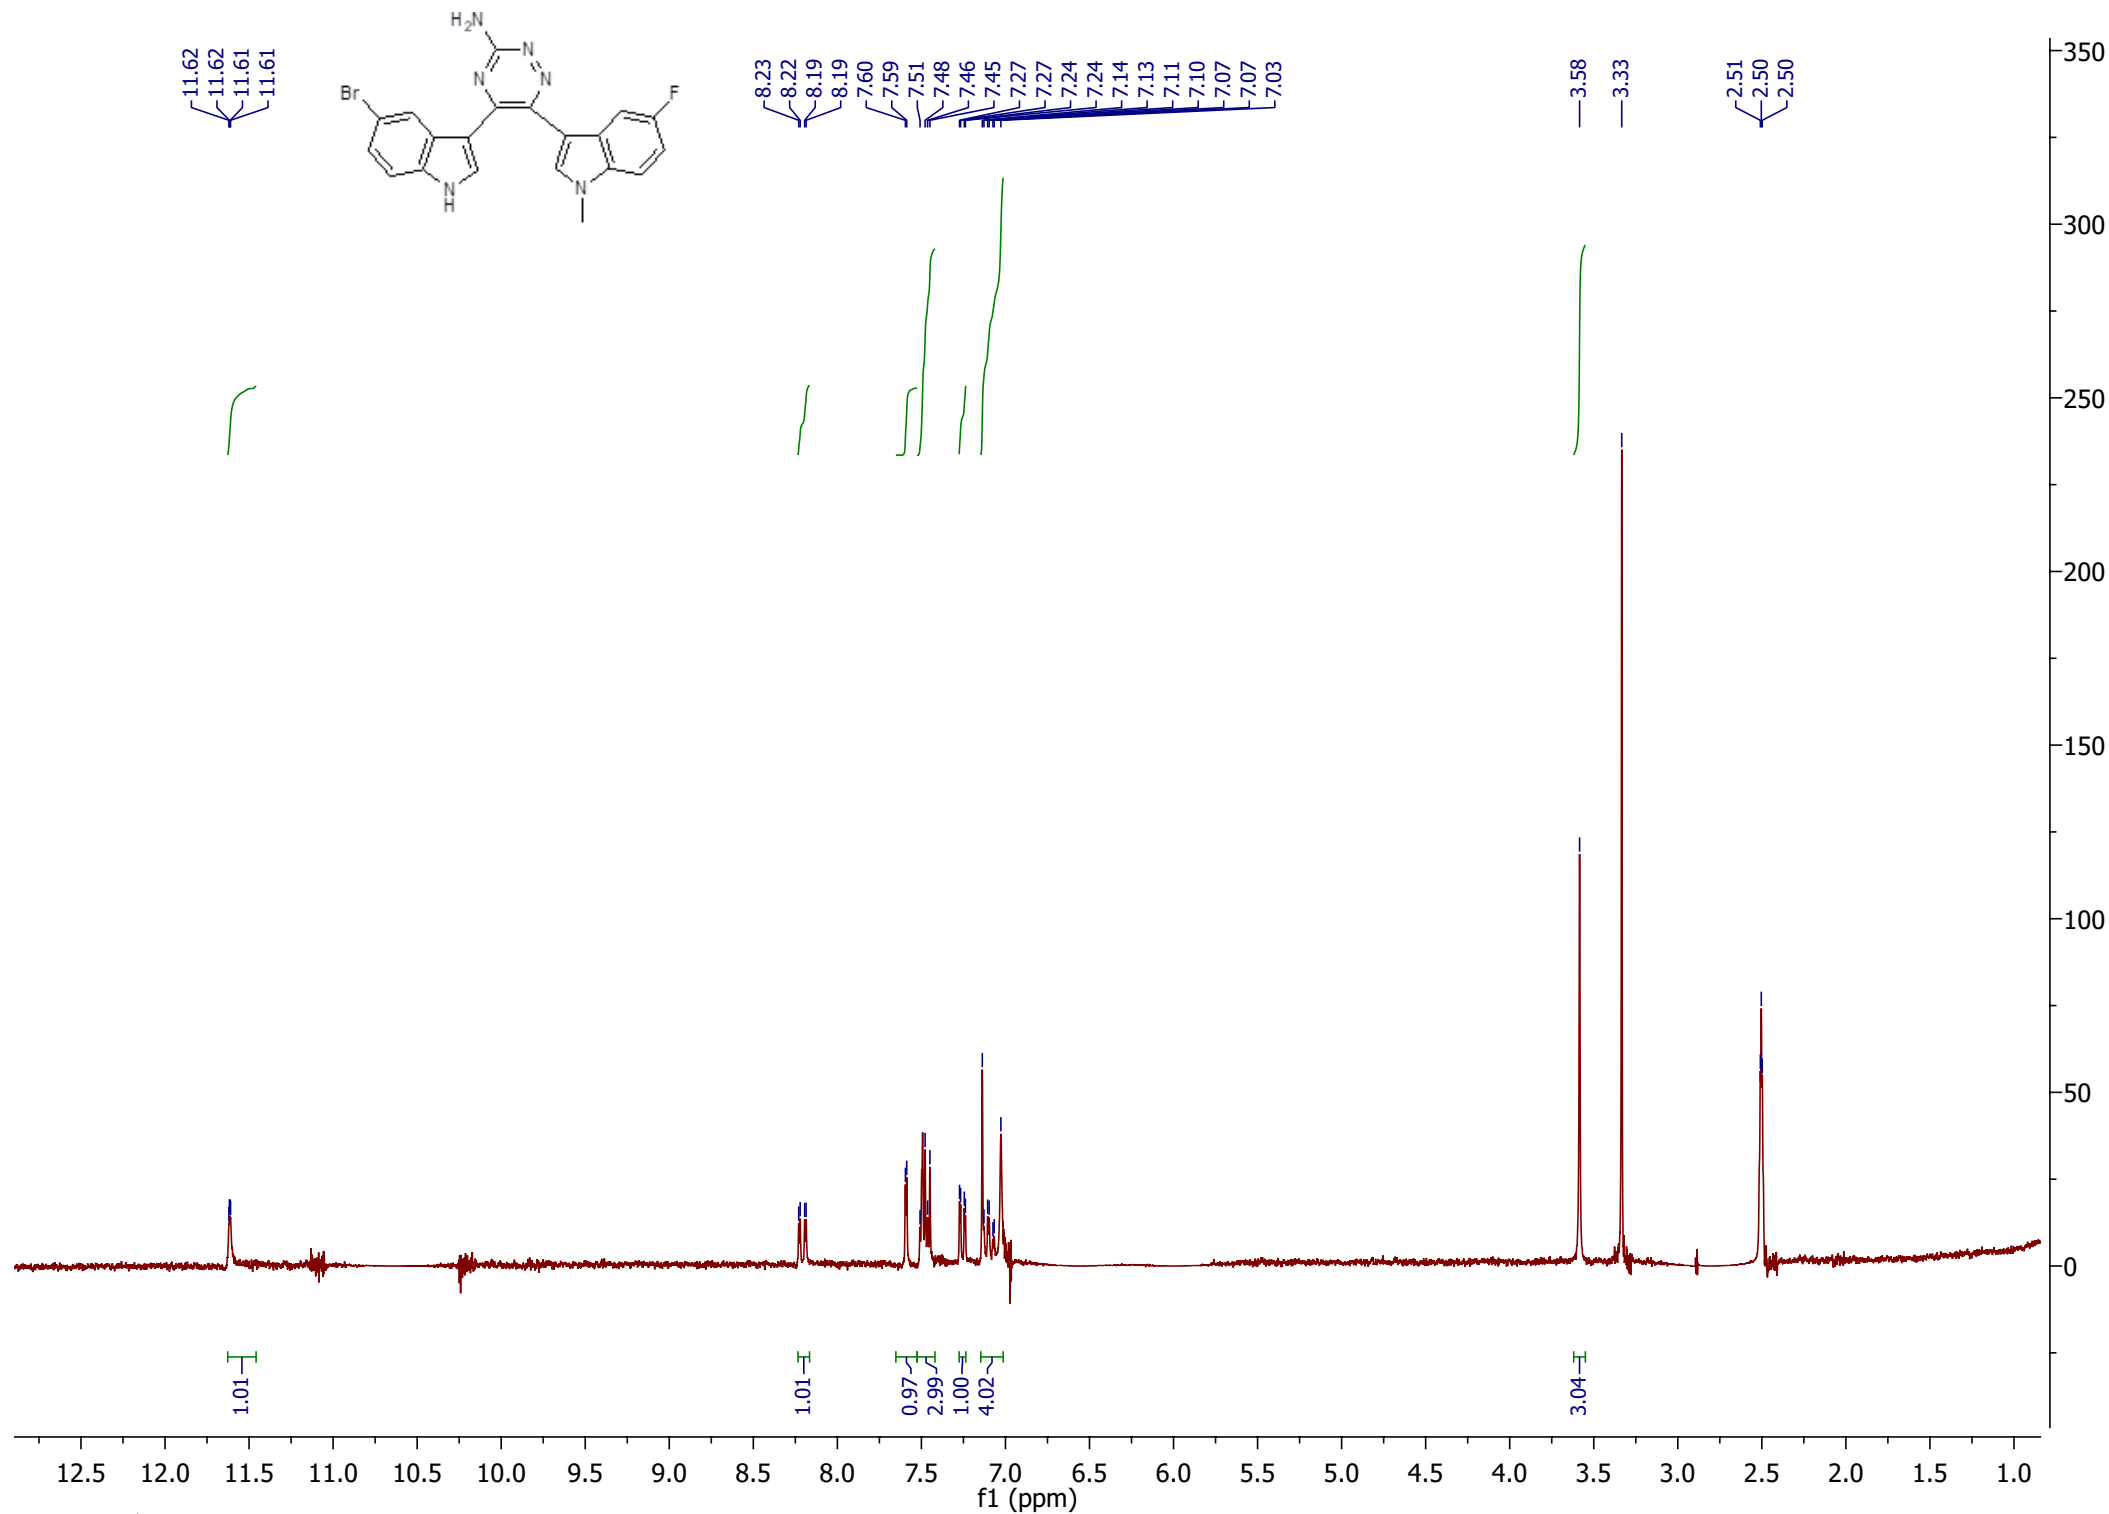

Figure S33:  $^1\text{H}$  NMR spectrum of compound **6t**

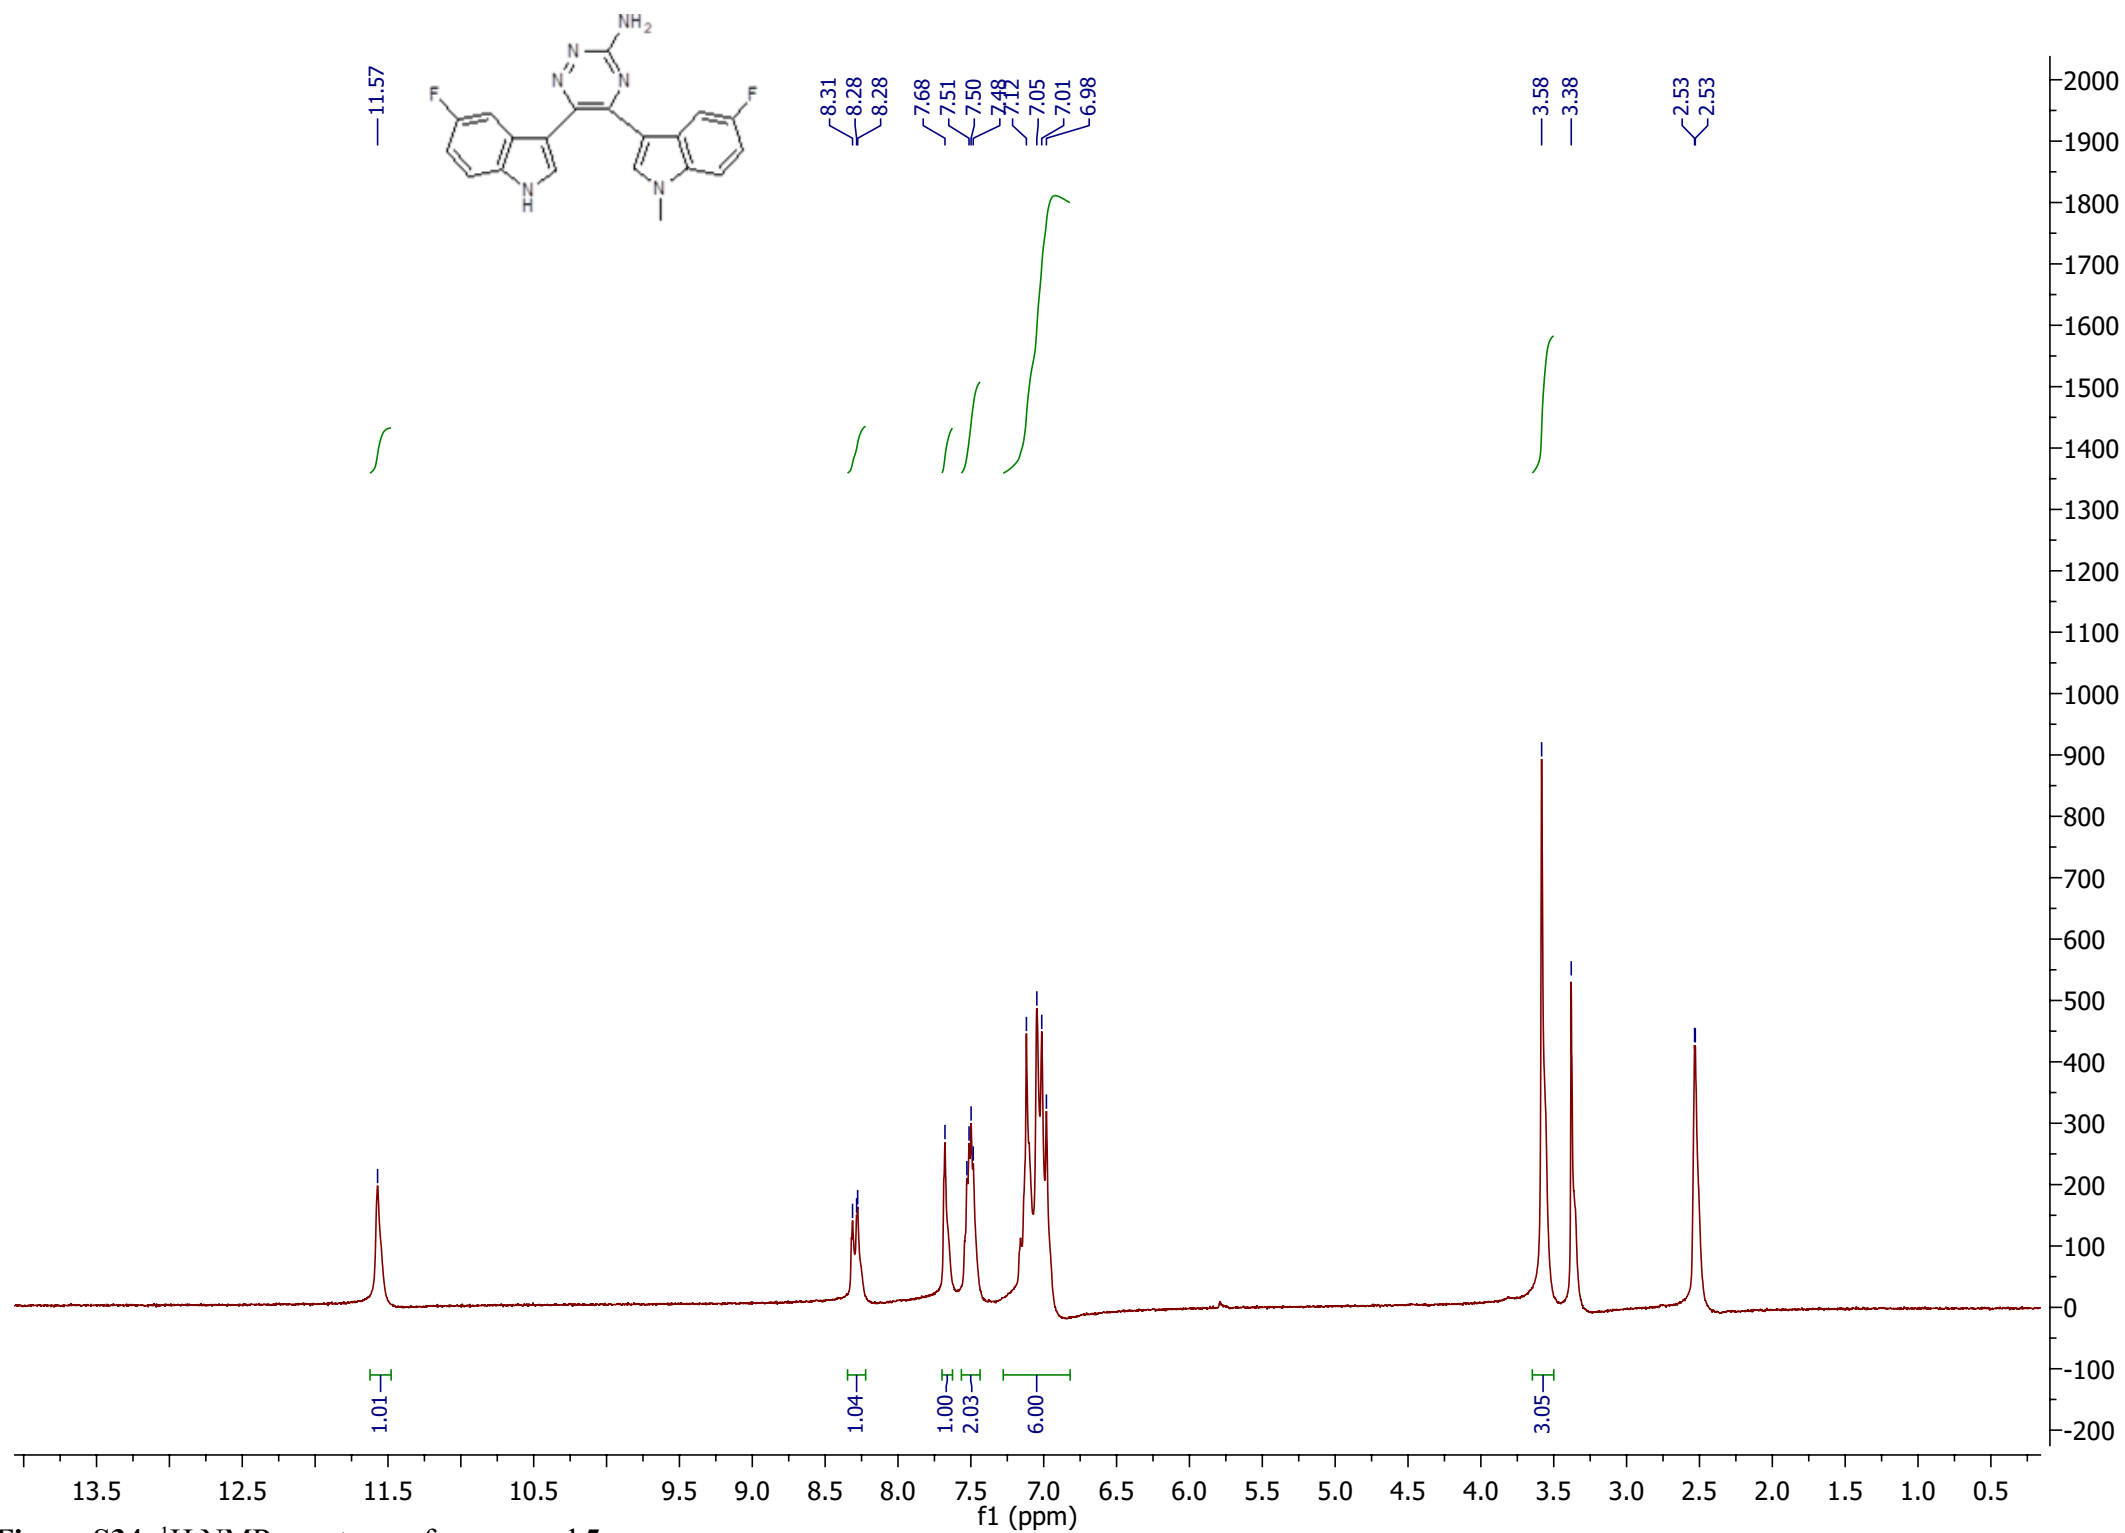

Figure S34: <sup>1</sup>H NMR spectrum of compound **5u**



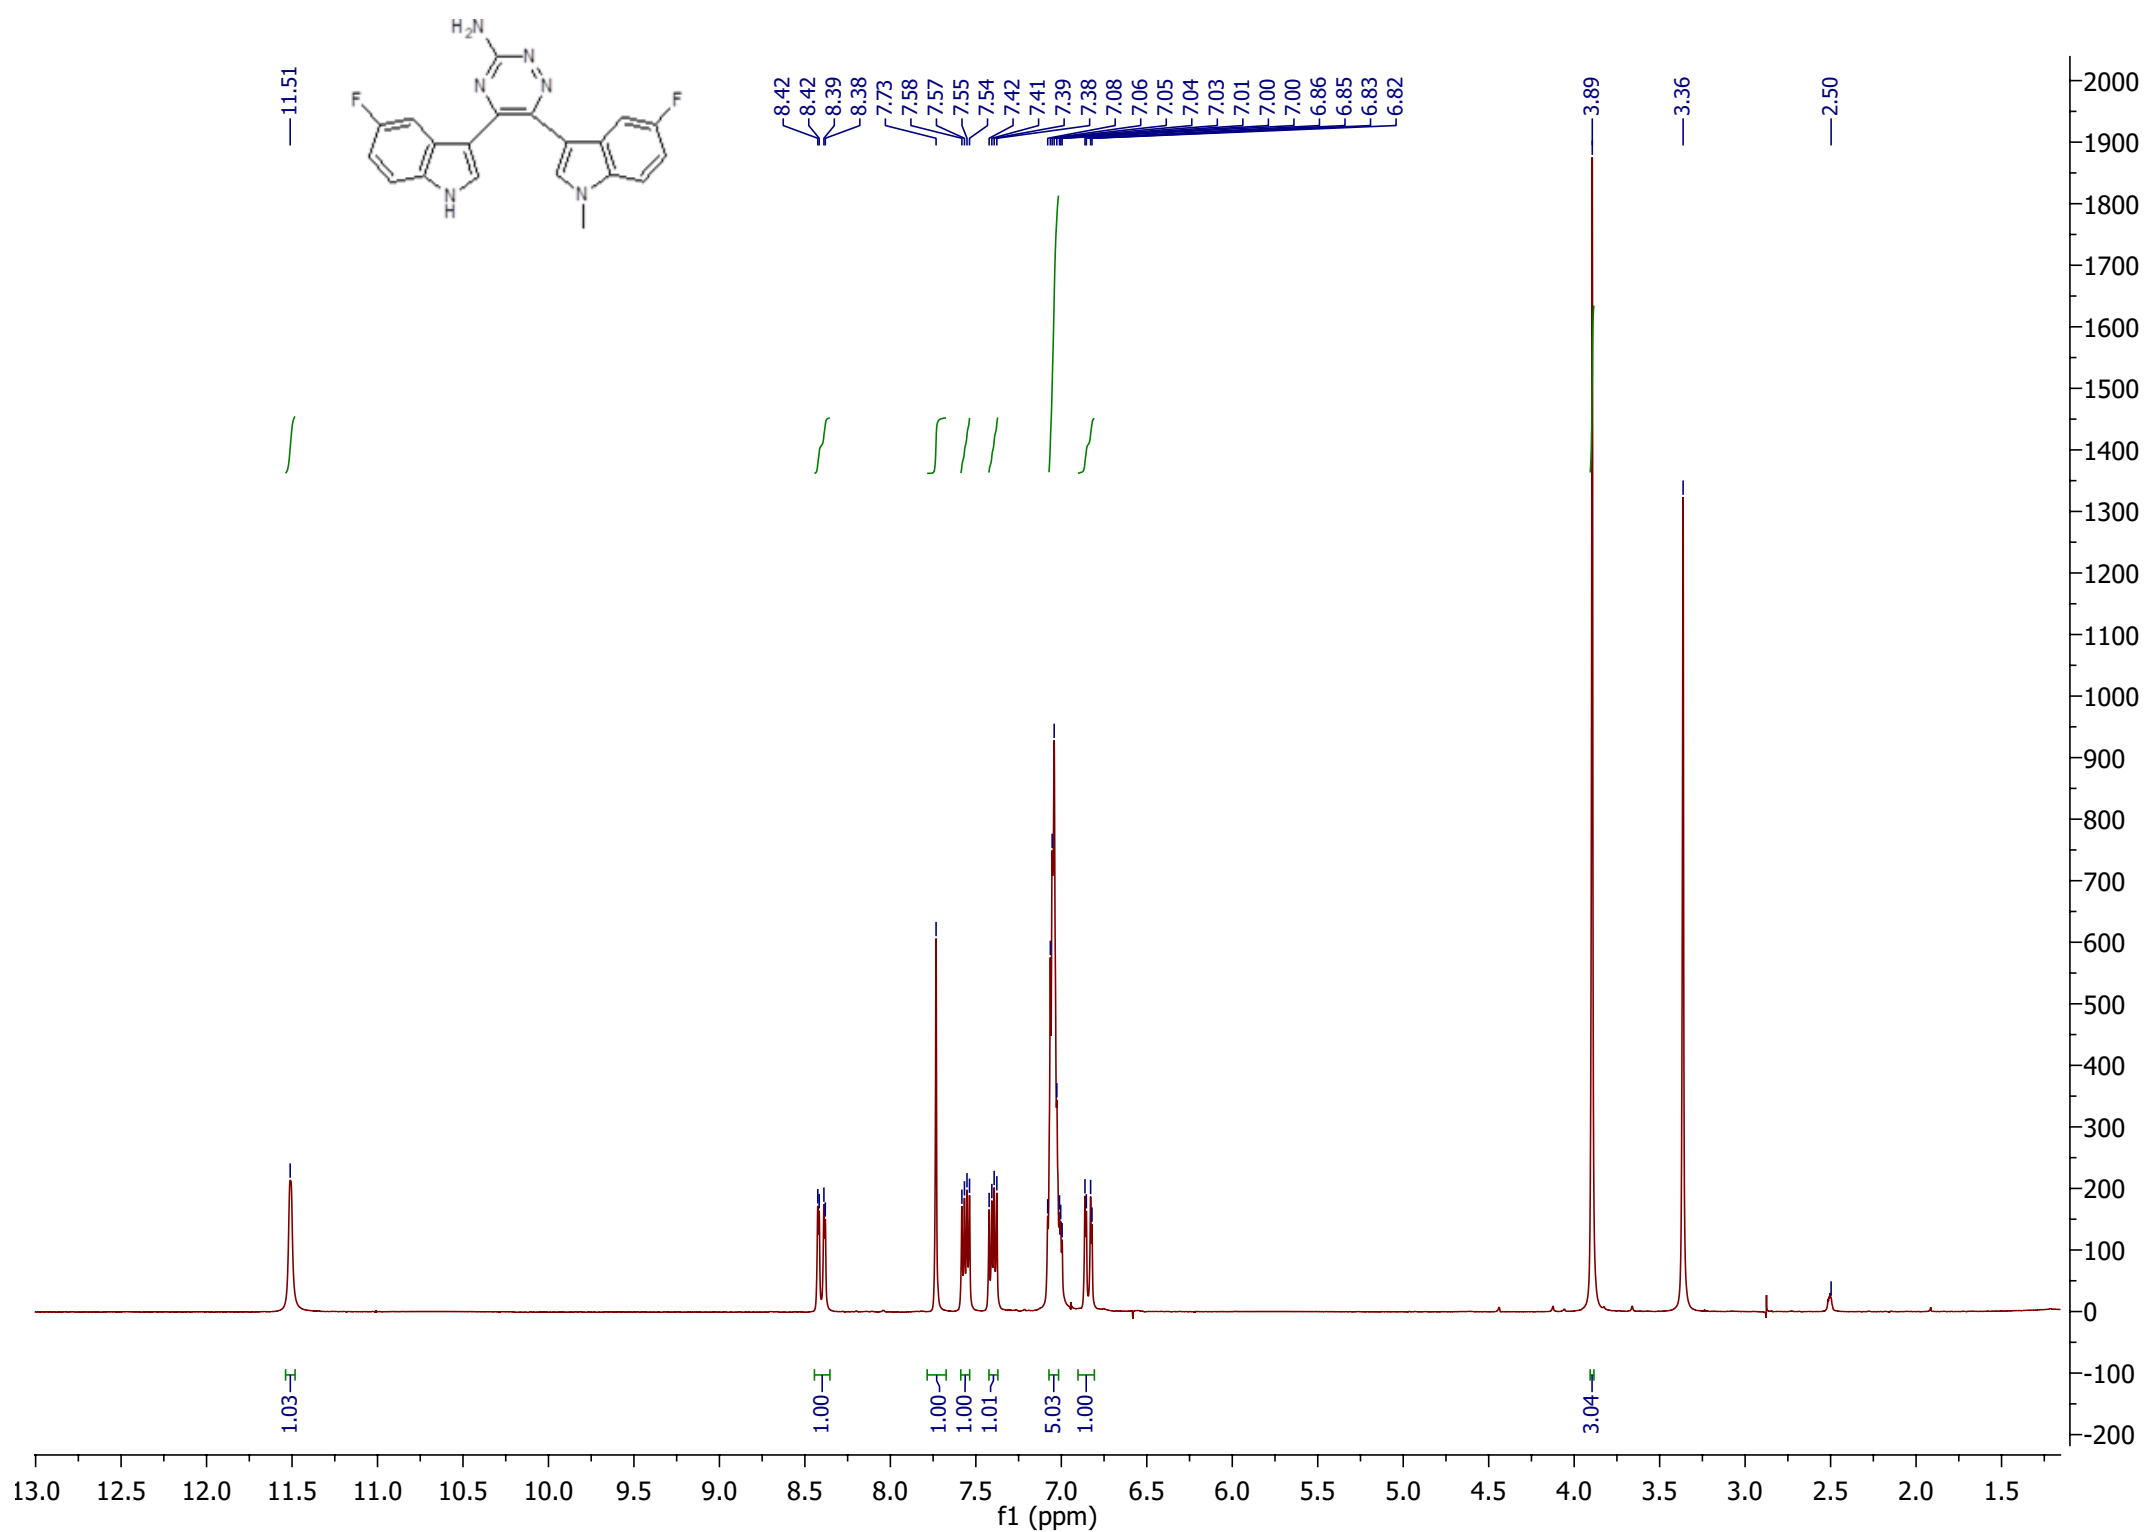

Figure S35: <sup>1</sup>H NMR spectrum of compound **6u**

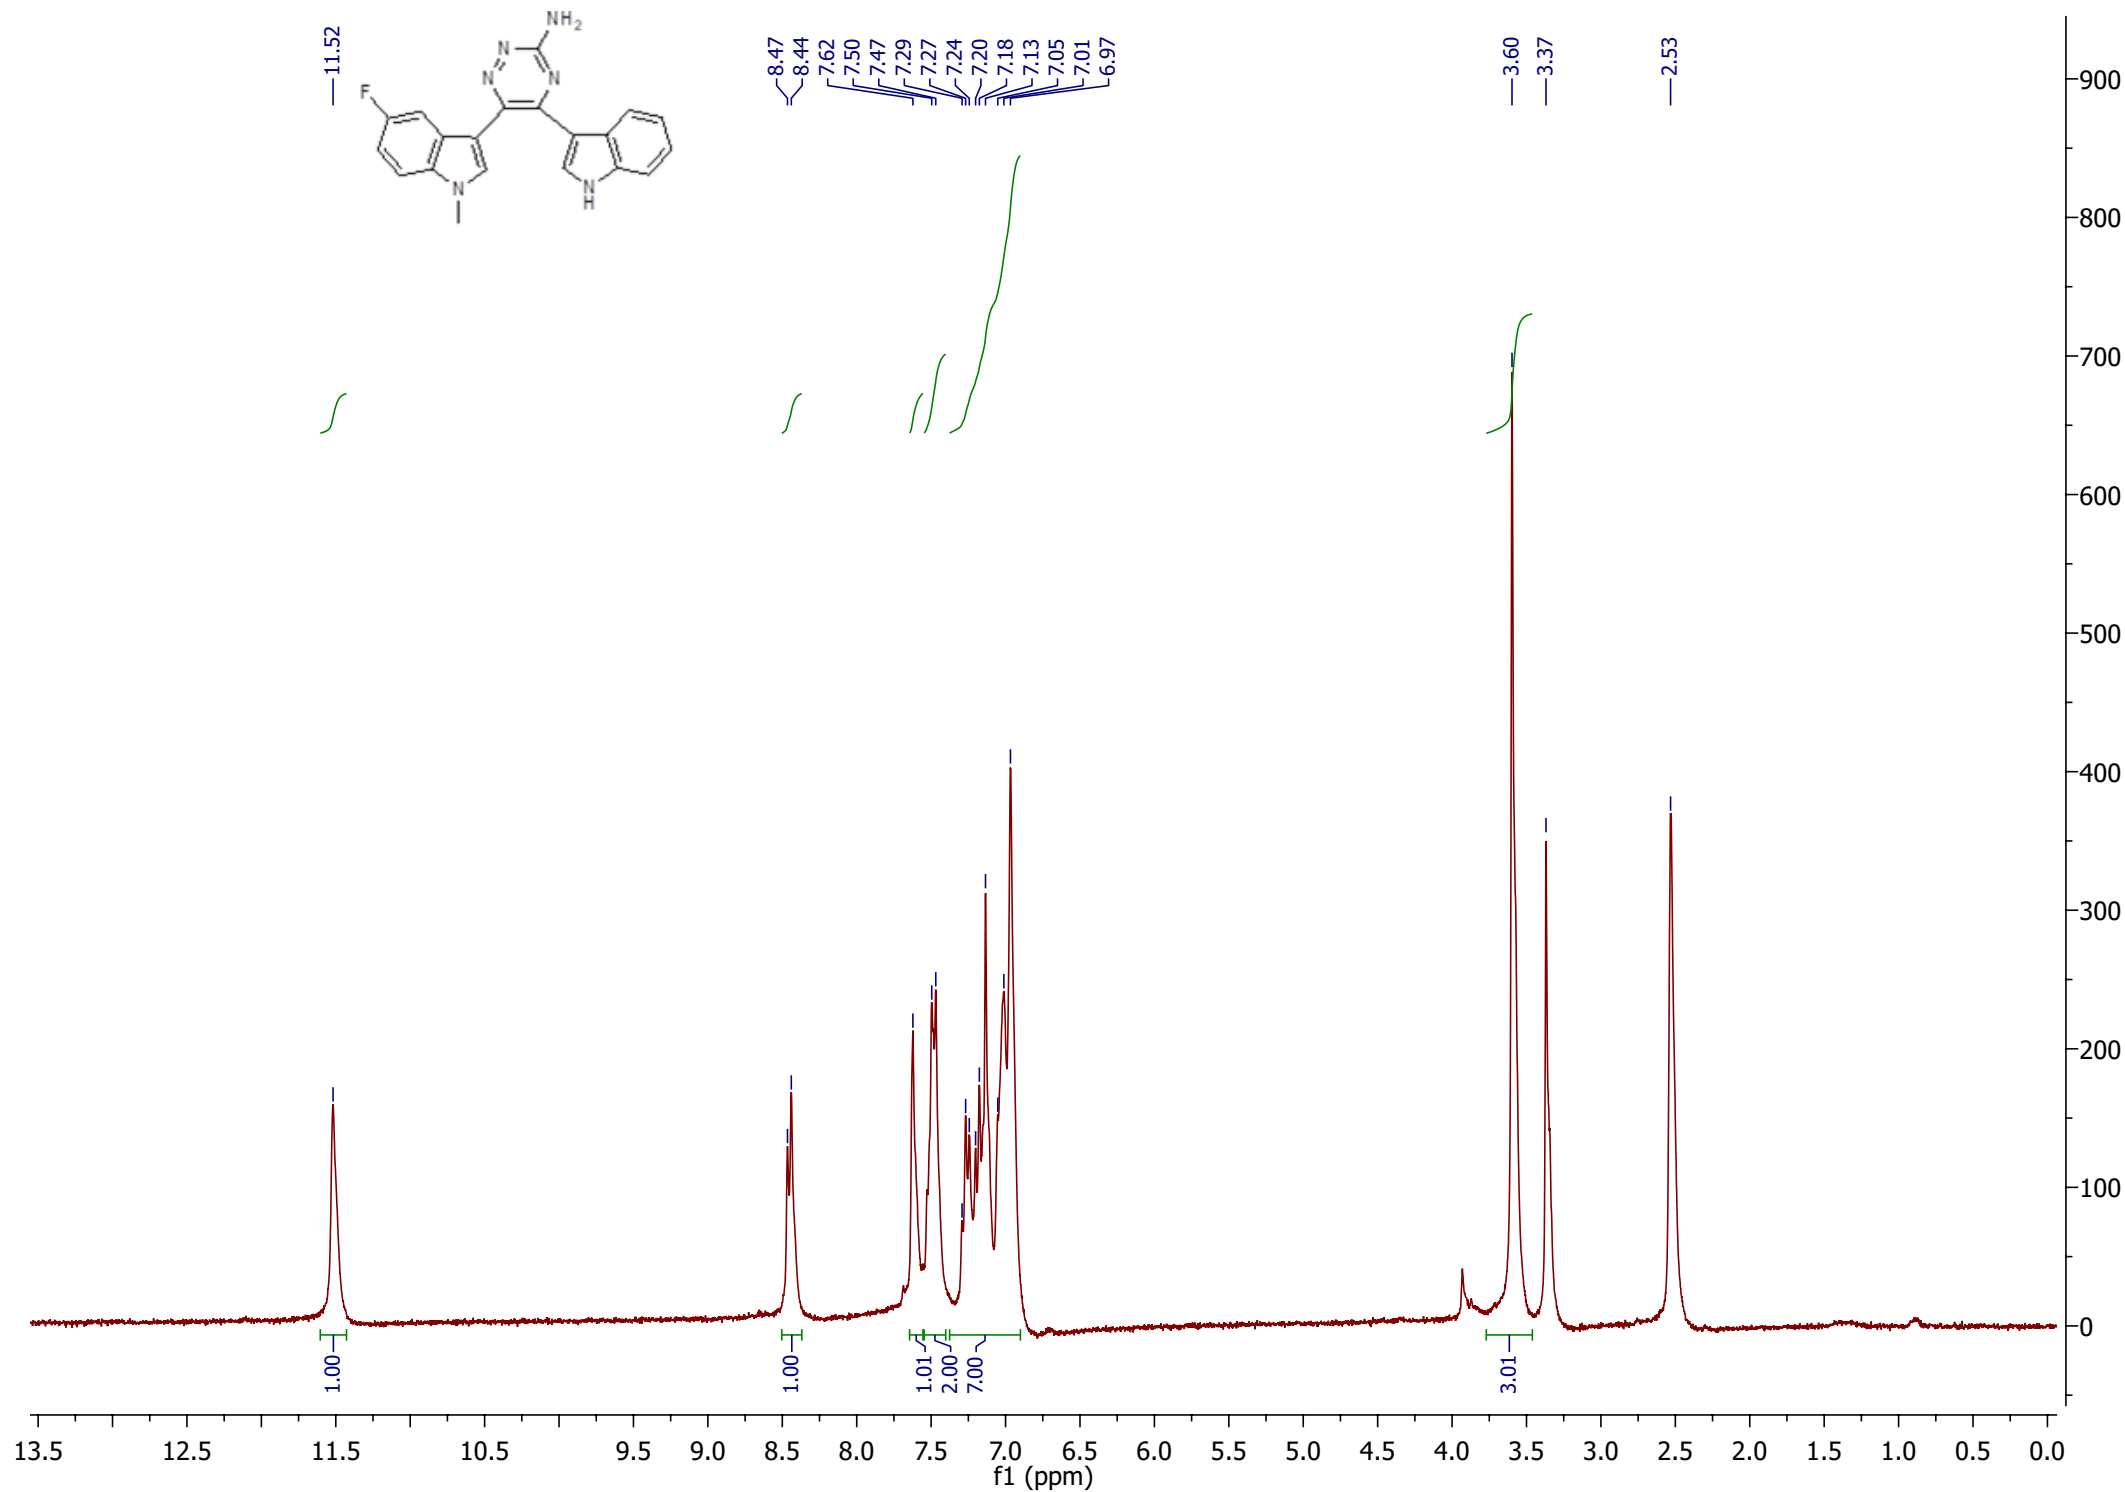

Figure S36  $^1\text{H}$  NMR spectrum of compound **5v**

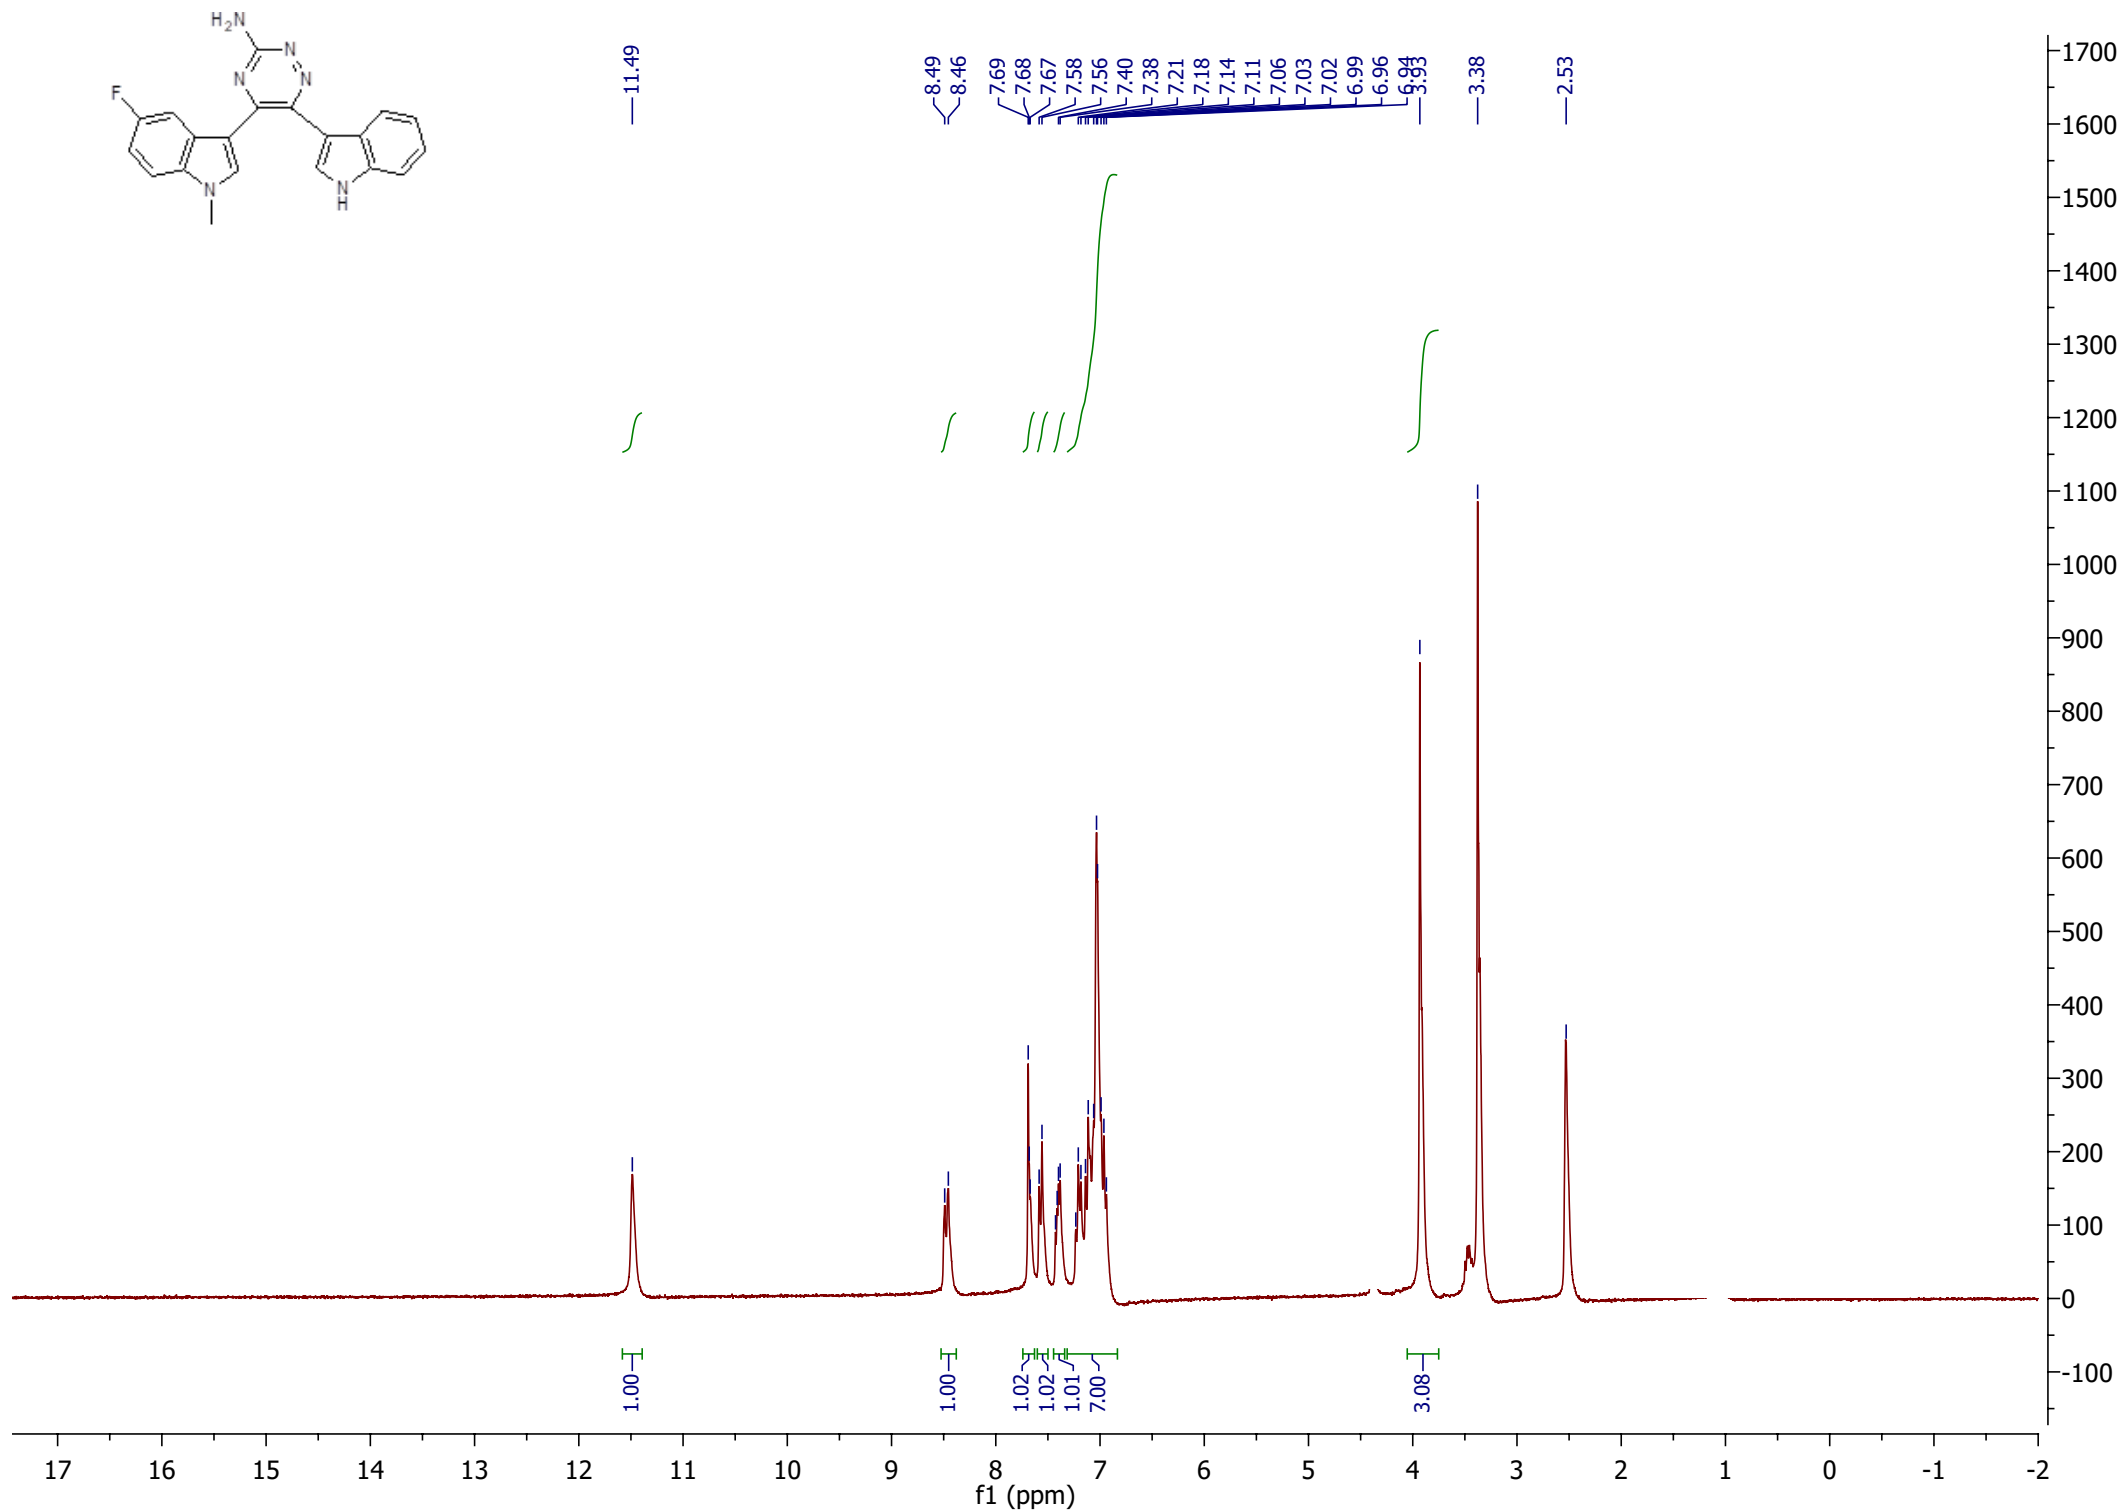

Figure S37:  $^1\text{H}$  NMR spectrum of compound **6v**

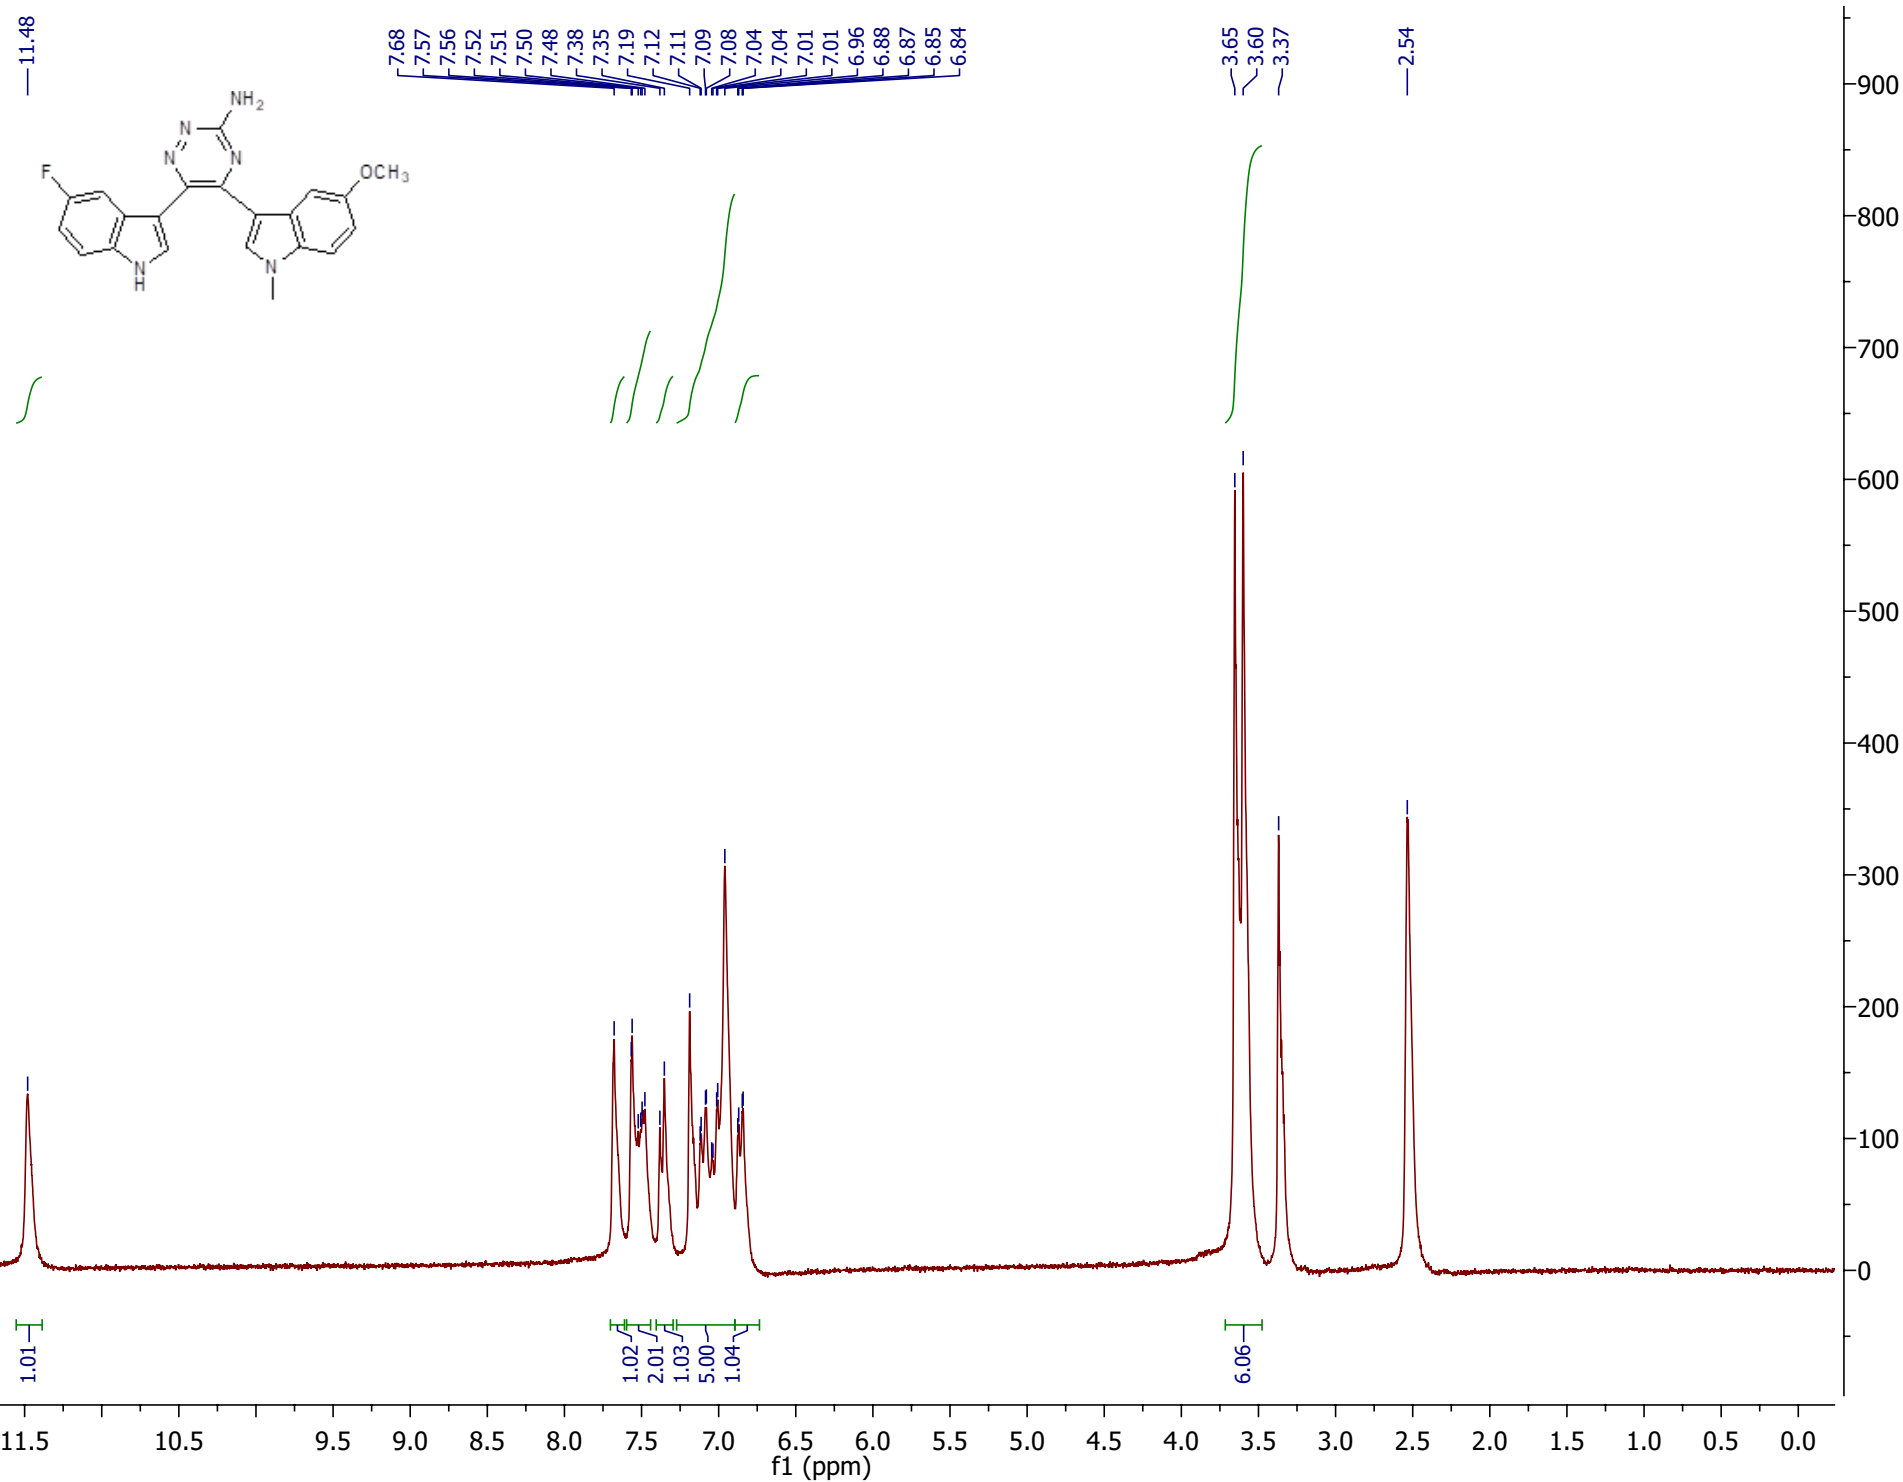

Figure S38:  $^1\text{H}$  NMR spectrum of compound **5w**

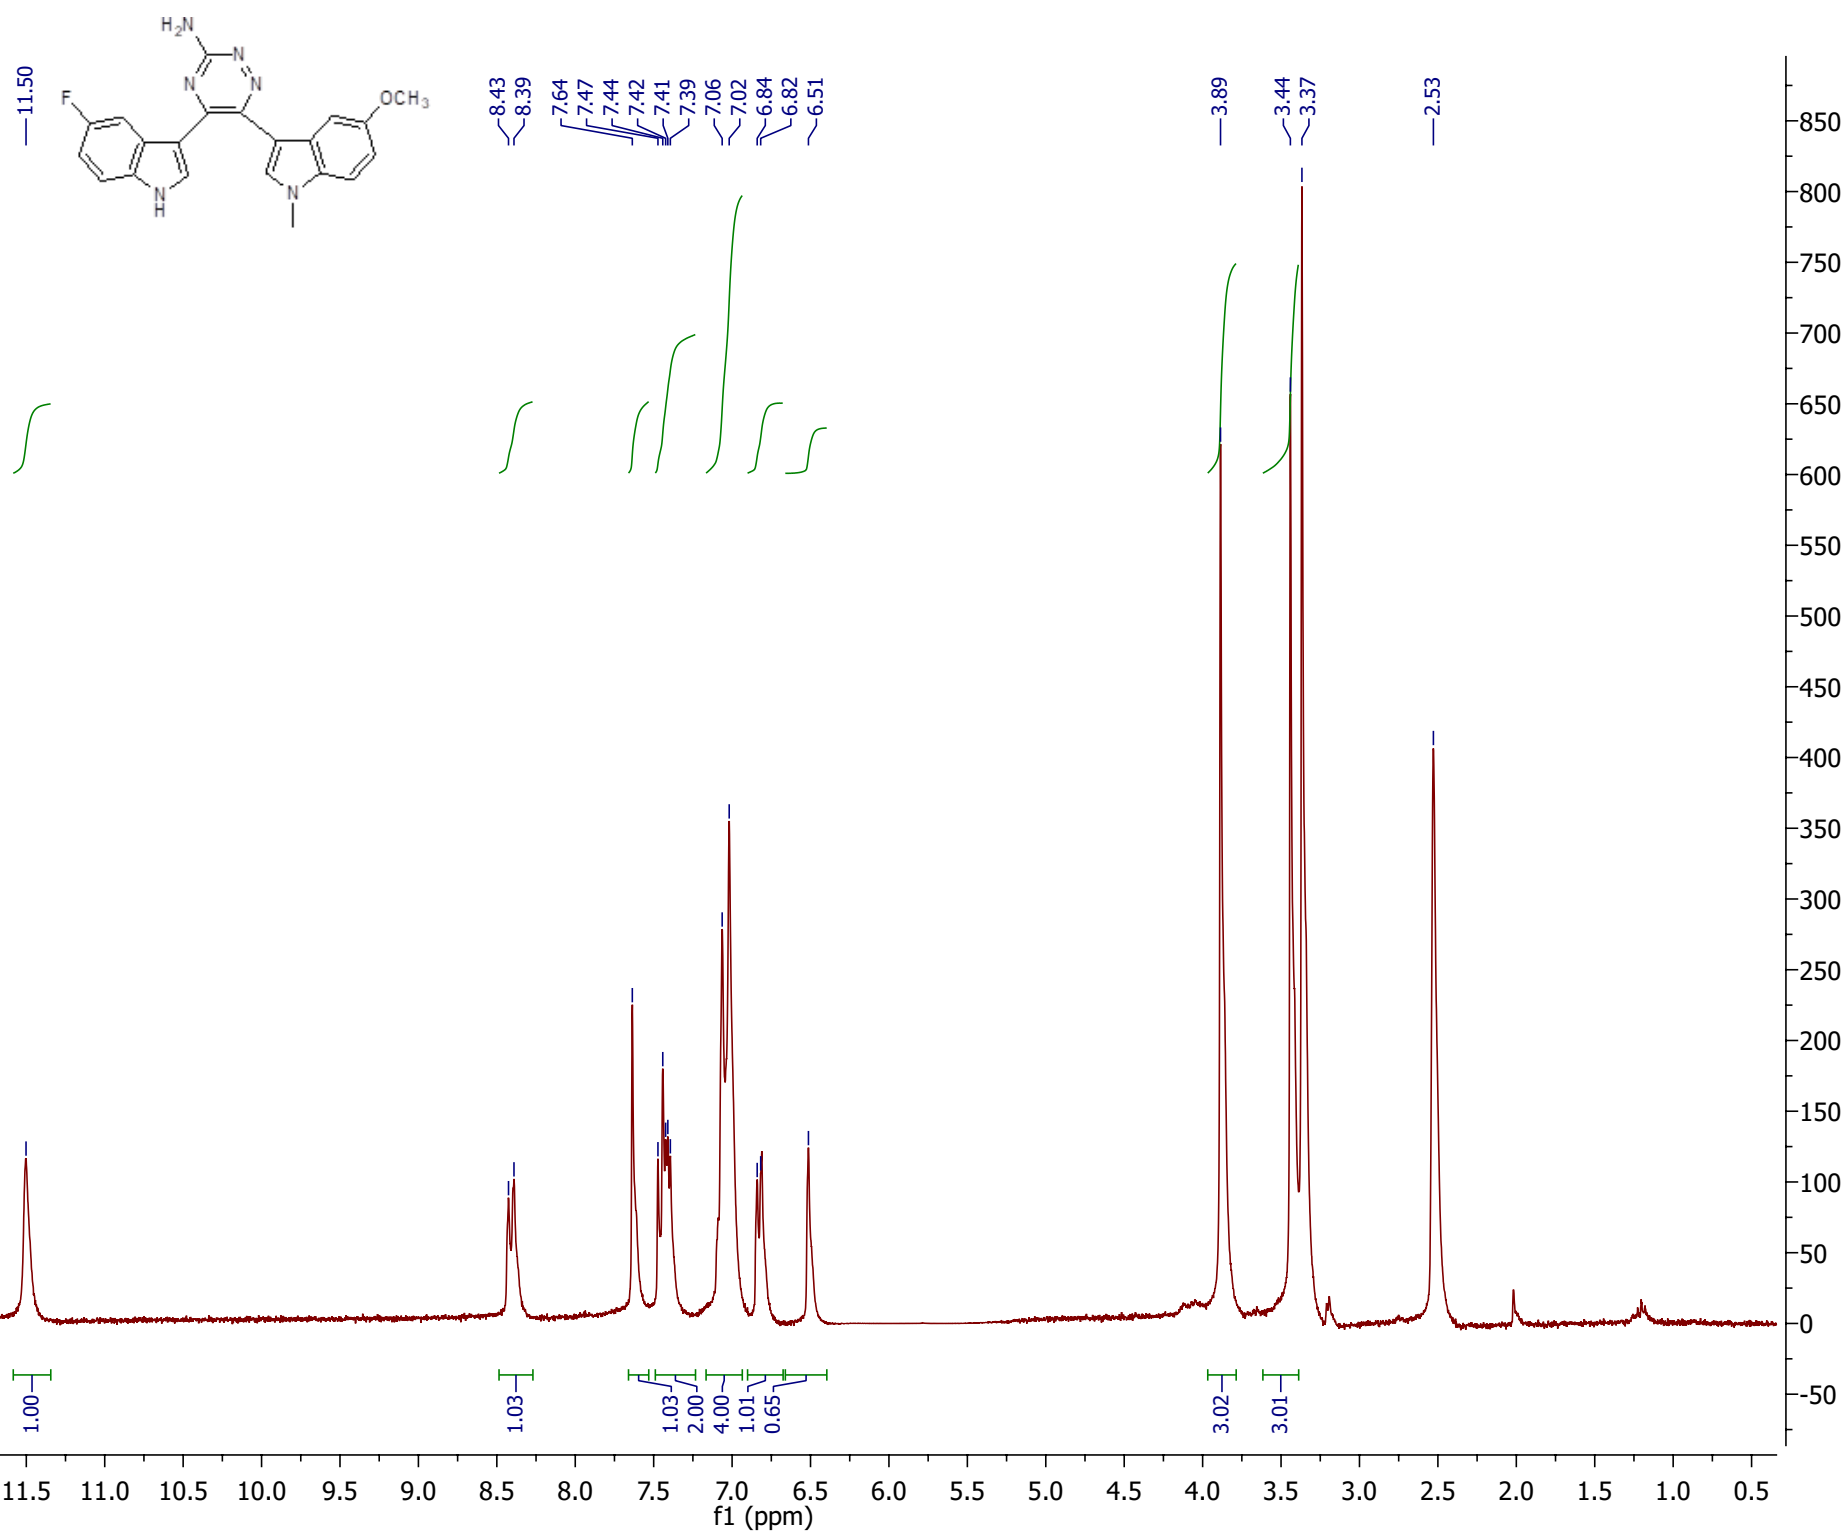

Figure S39: <sup>1</sup>H NMR spectrum of compound **6w**

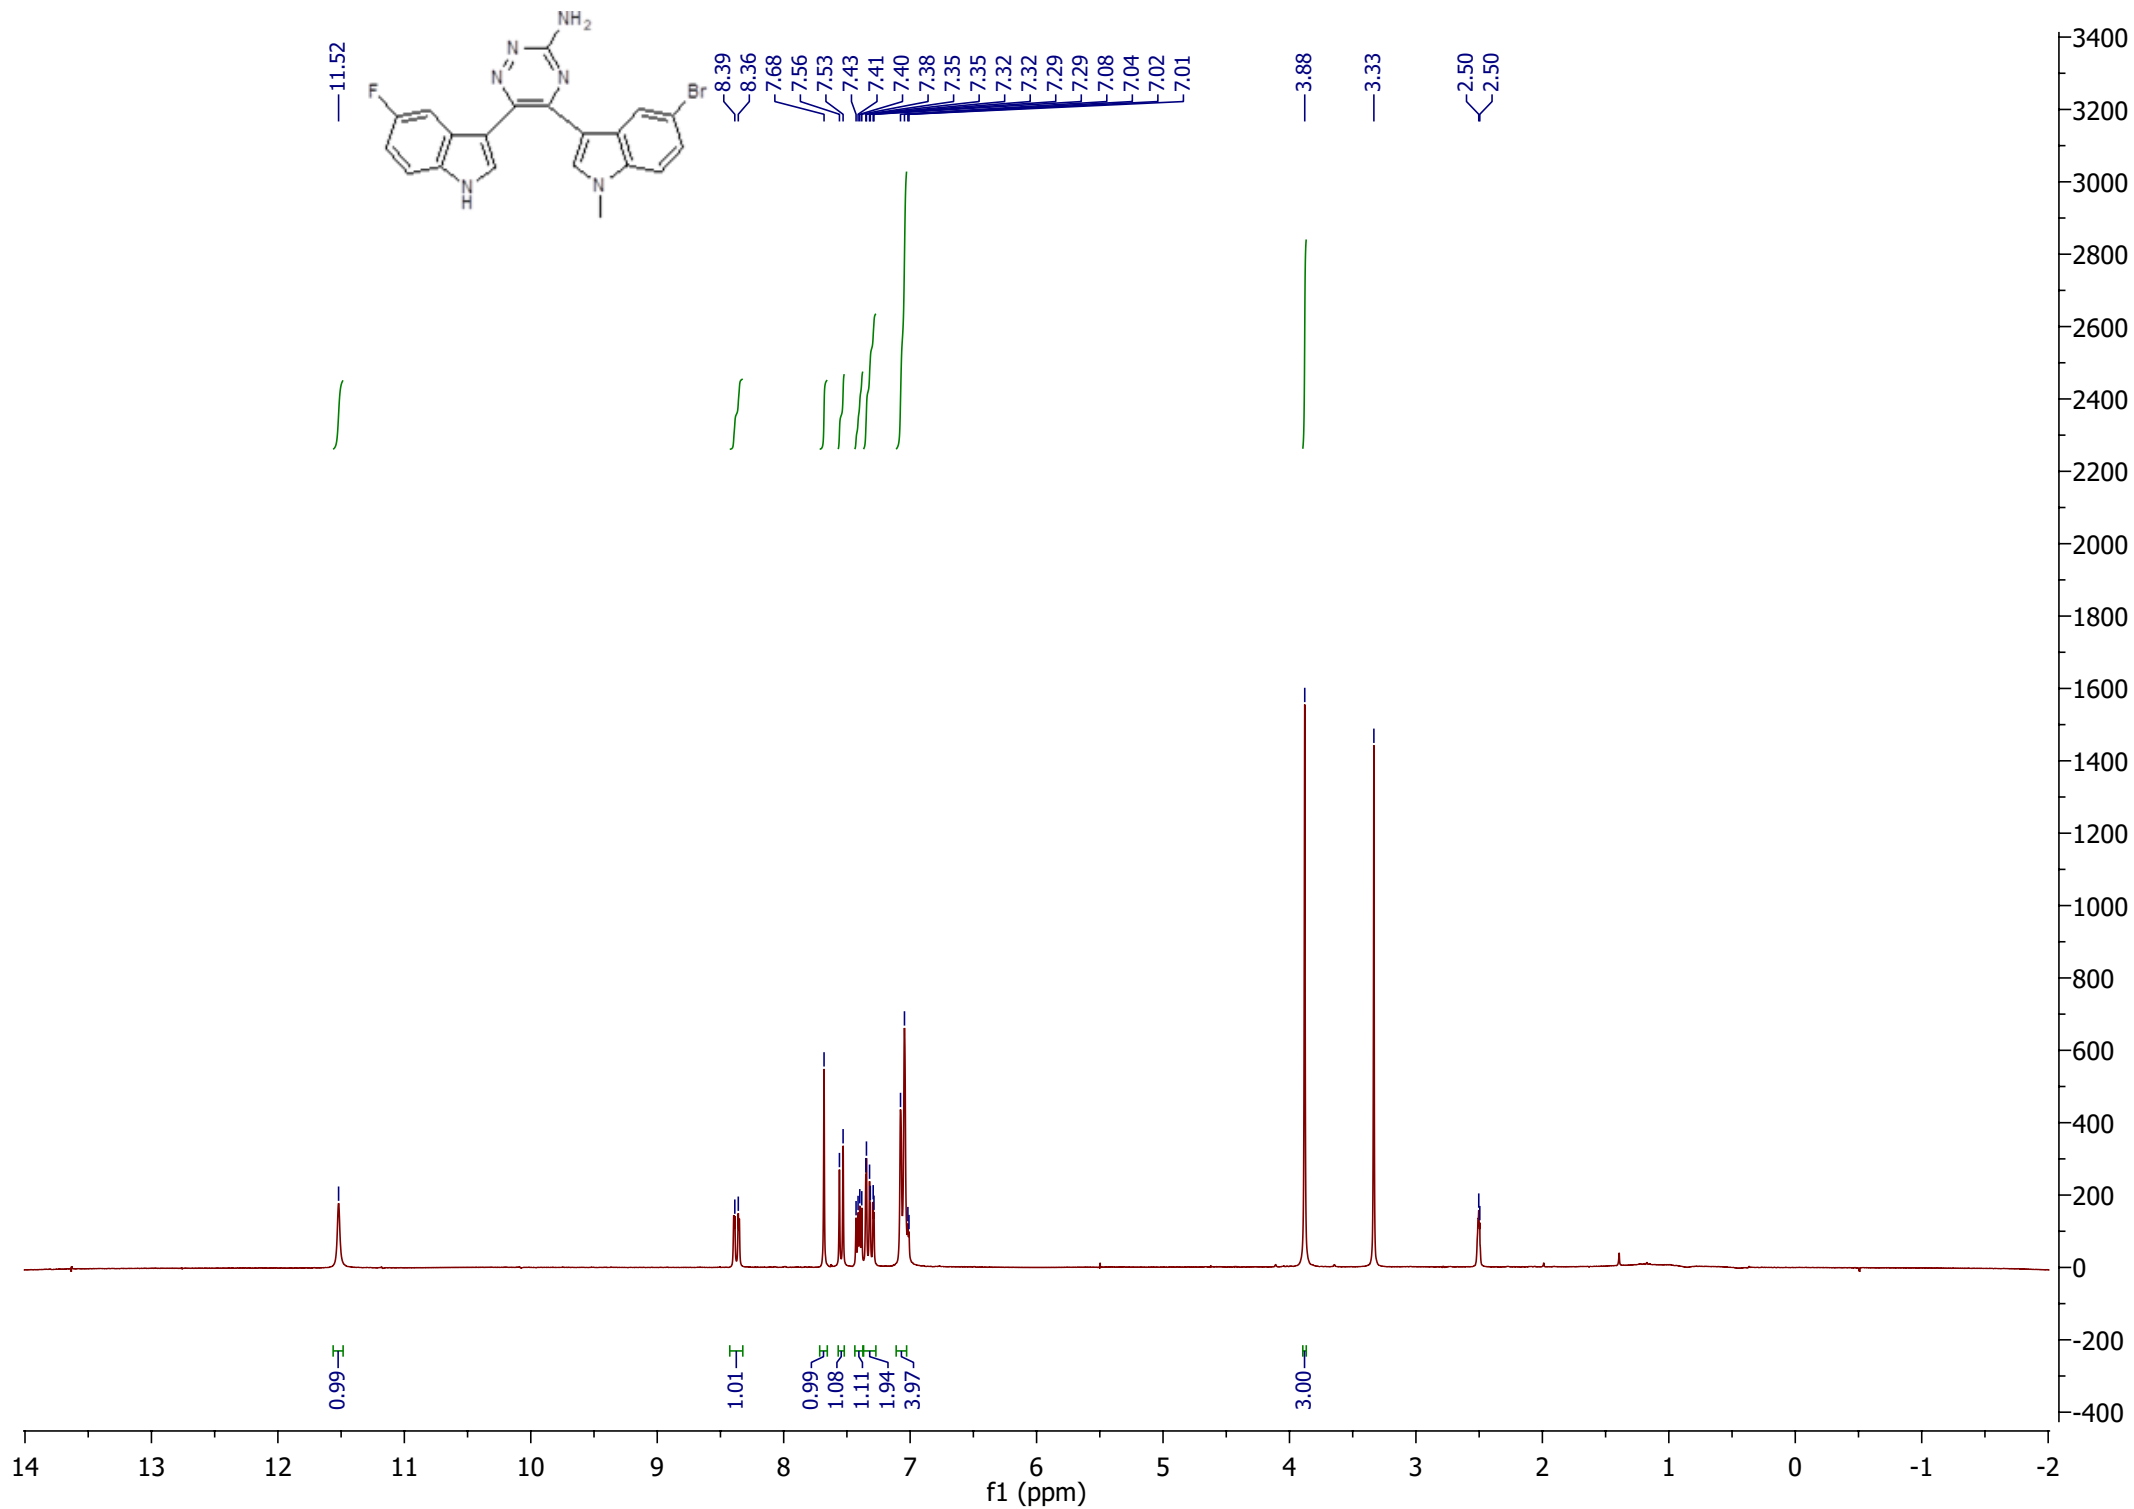

Figure S40: <sup>1</sup>H NMR spectrum of compound **5x**

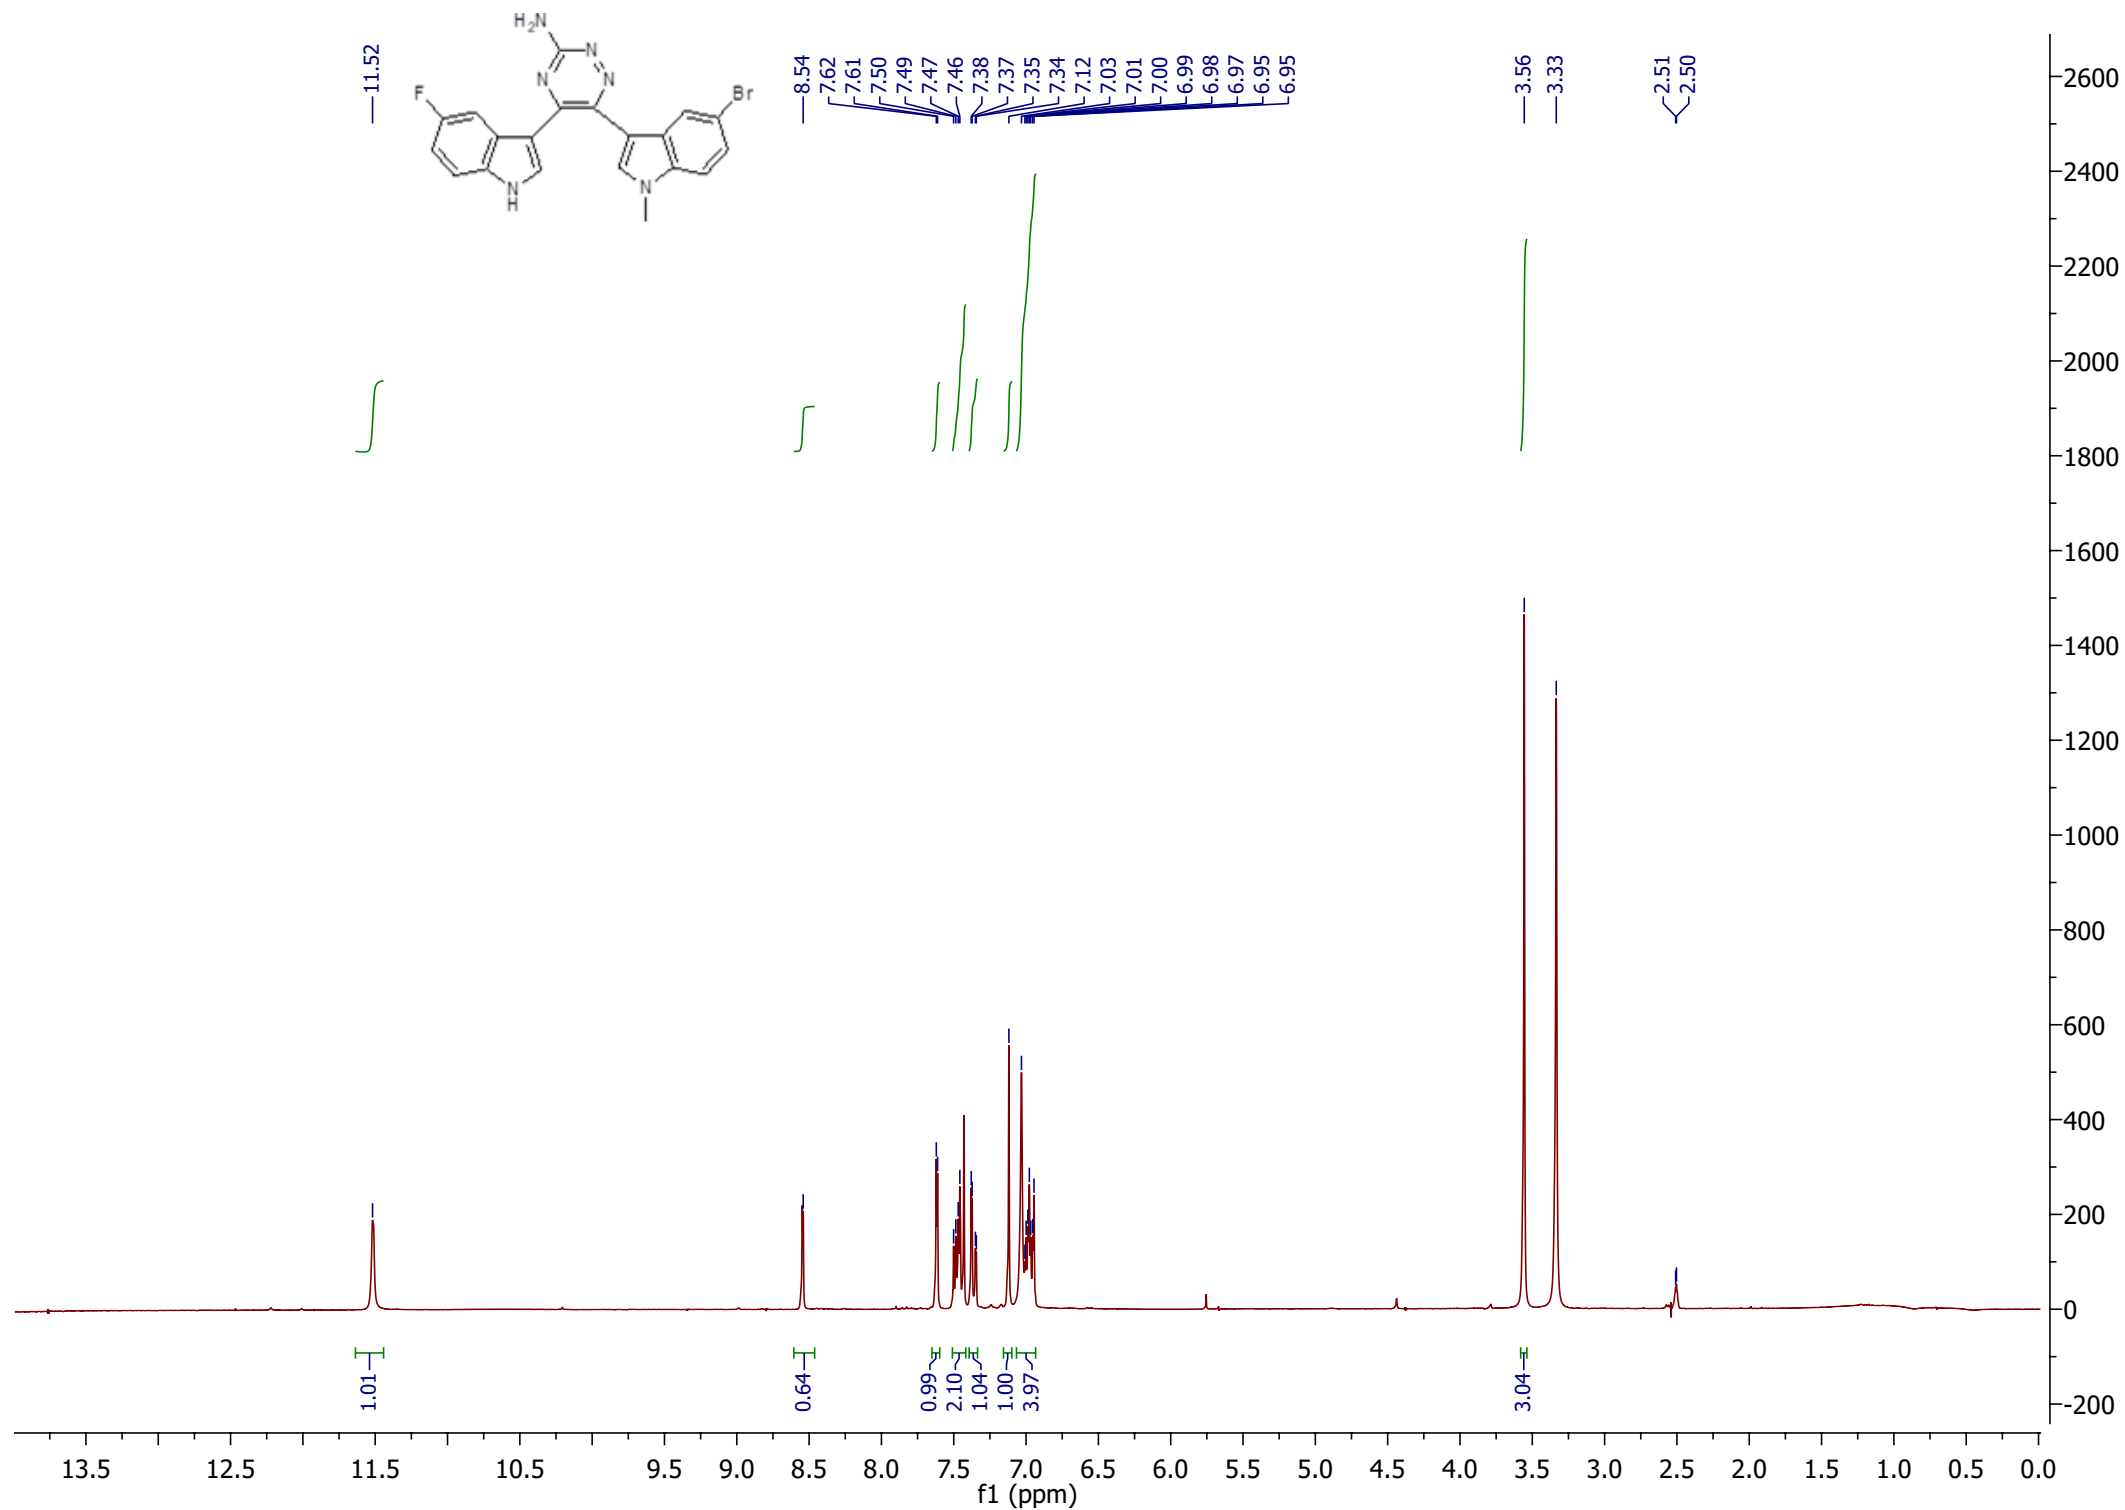

Figure S41: <sup>1</sup>H NMR spectrum of compound 6x

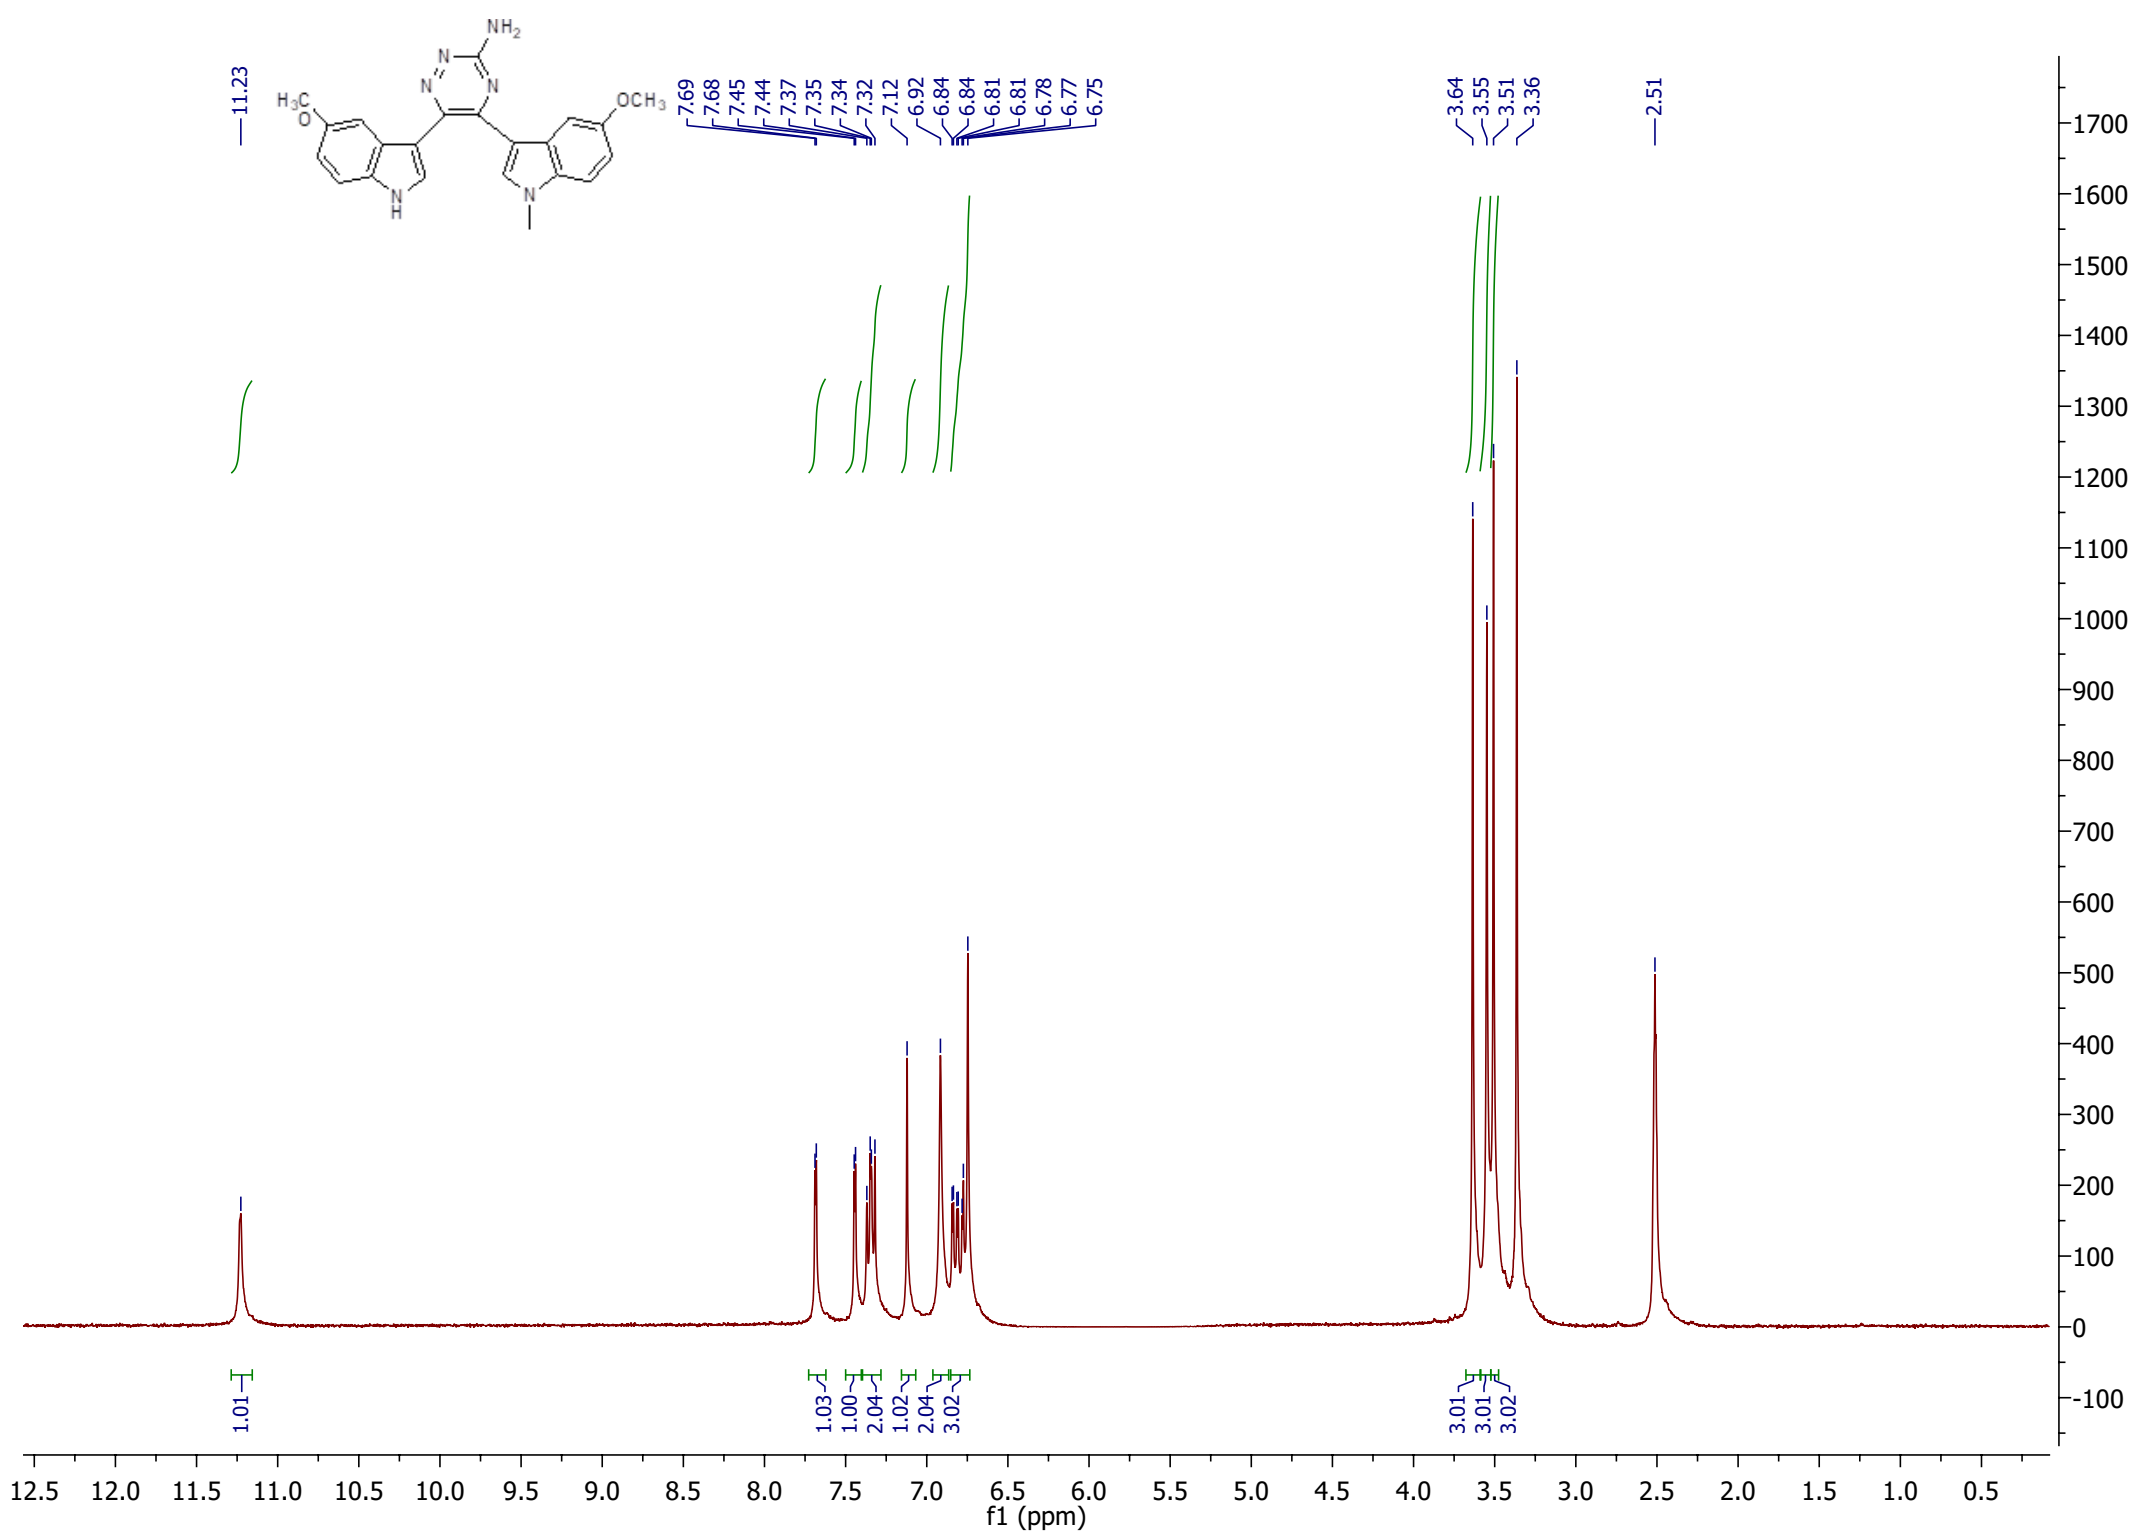

Figure S42:  $^1\text{H}$  NMR spectrum of compound **5y**



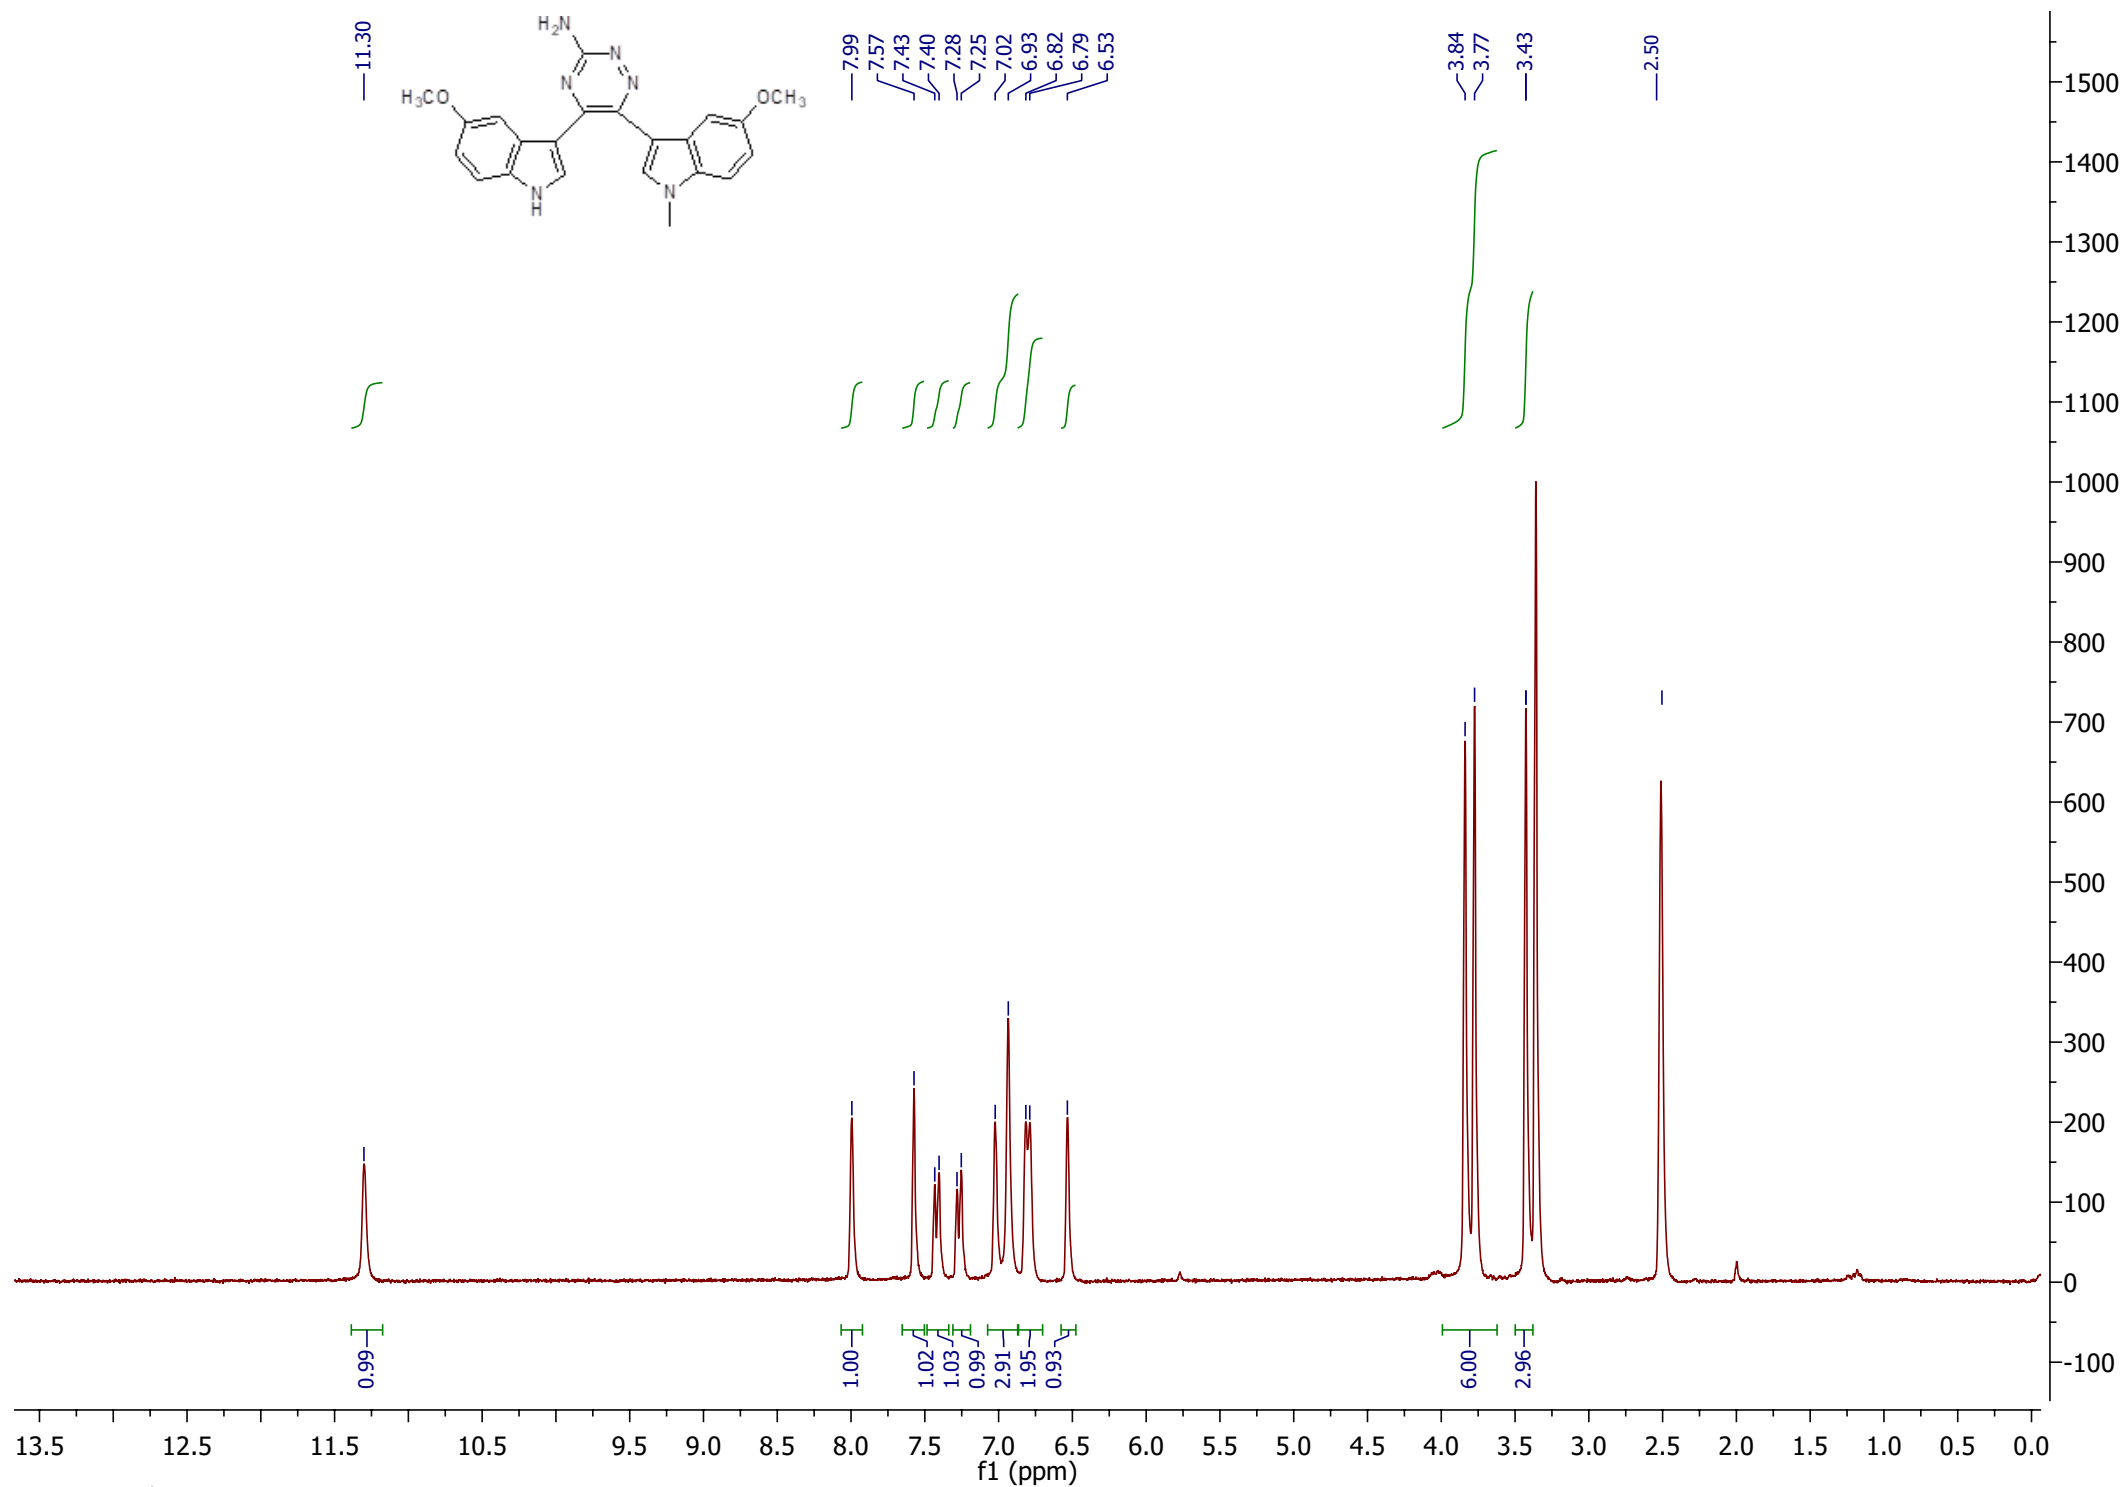

Figure S43: <sup>1</sup>H NMR spectrum of compound **6y**

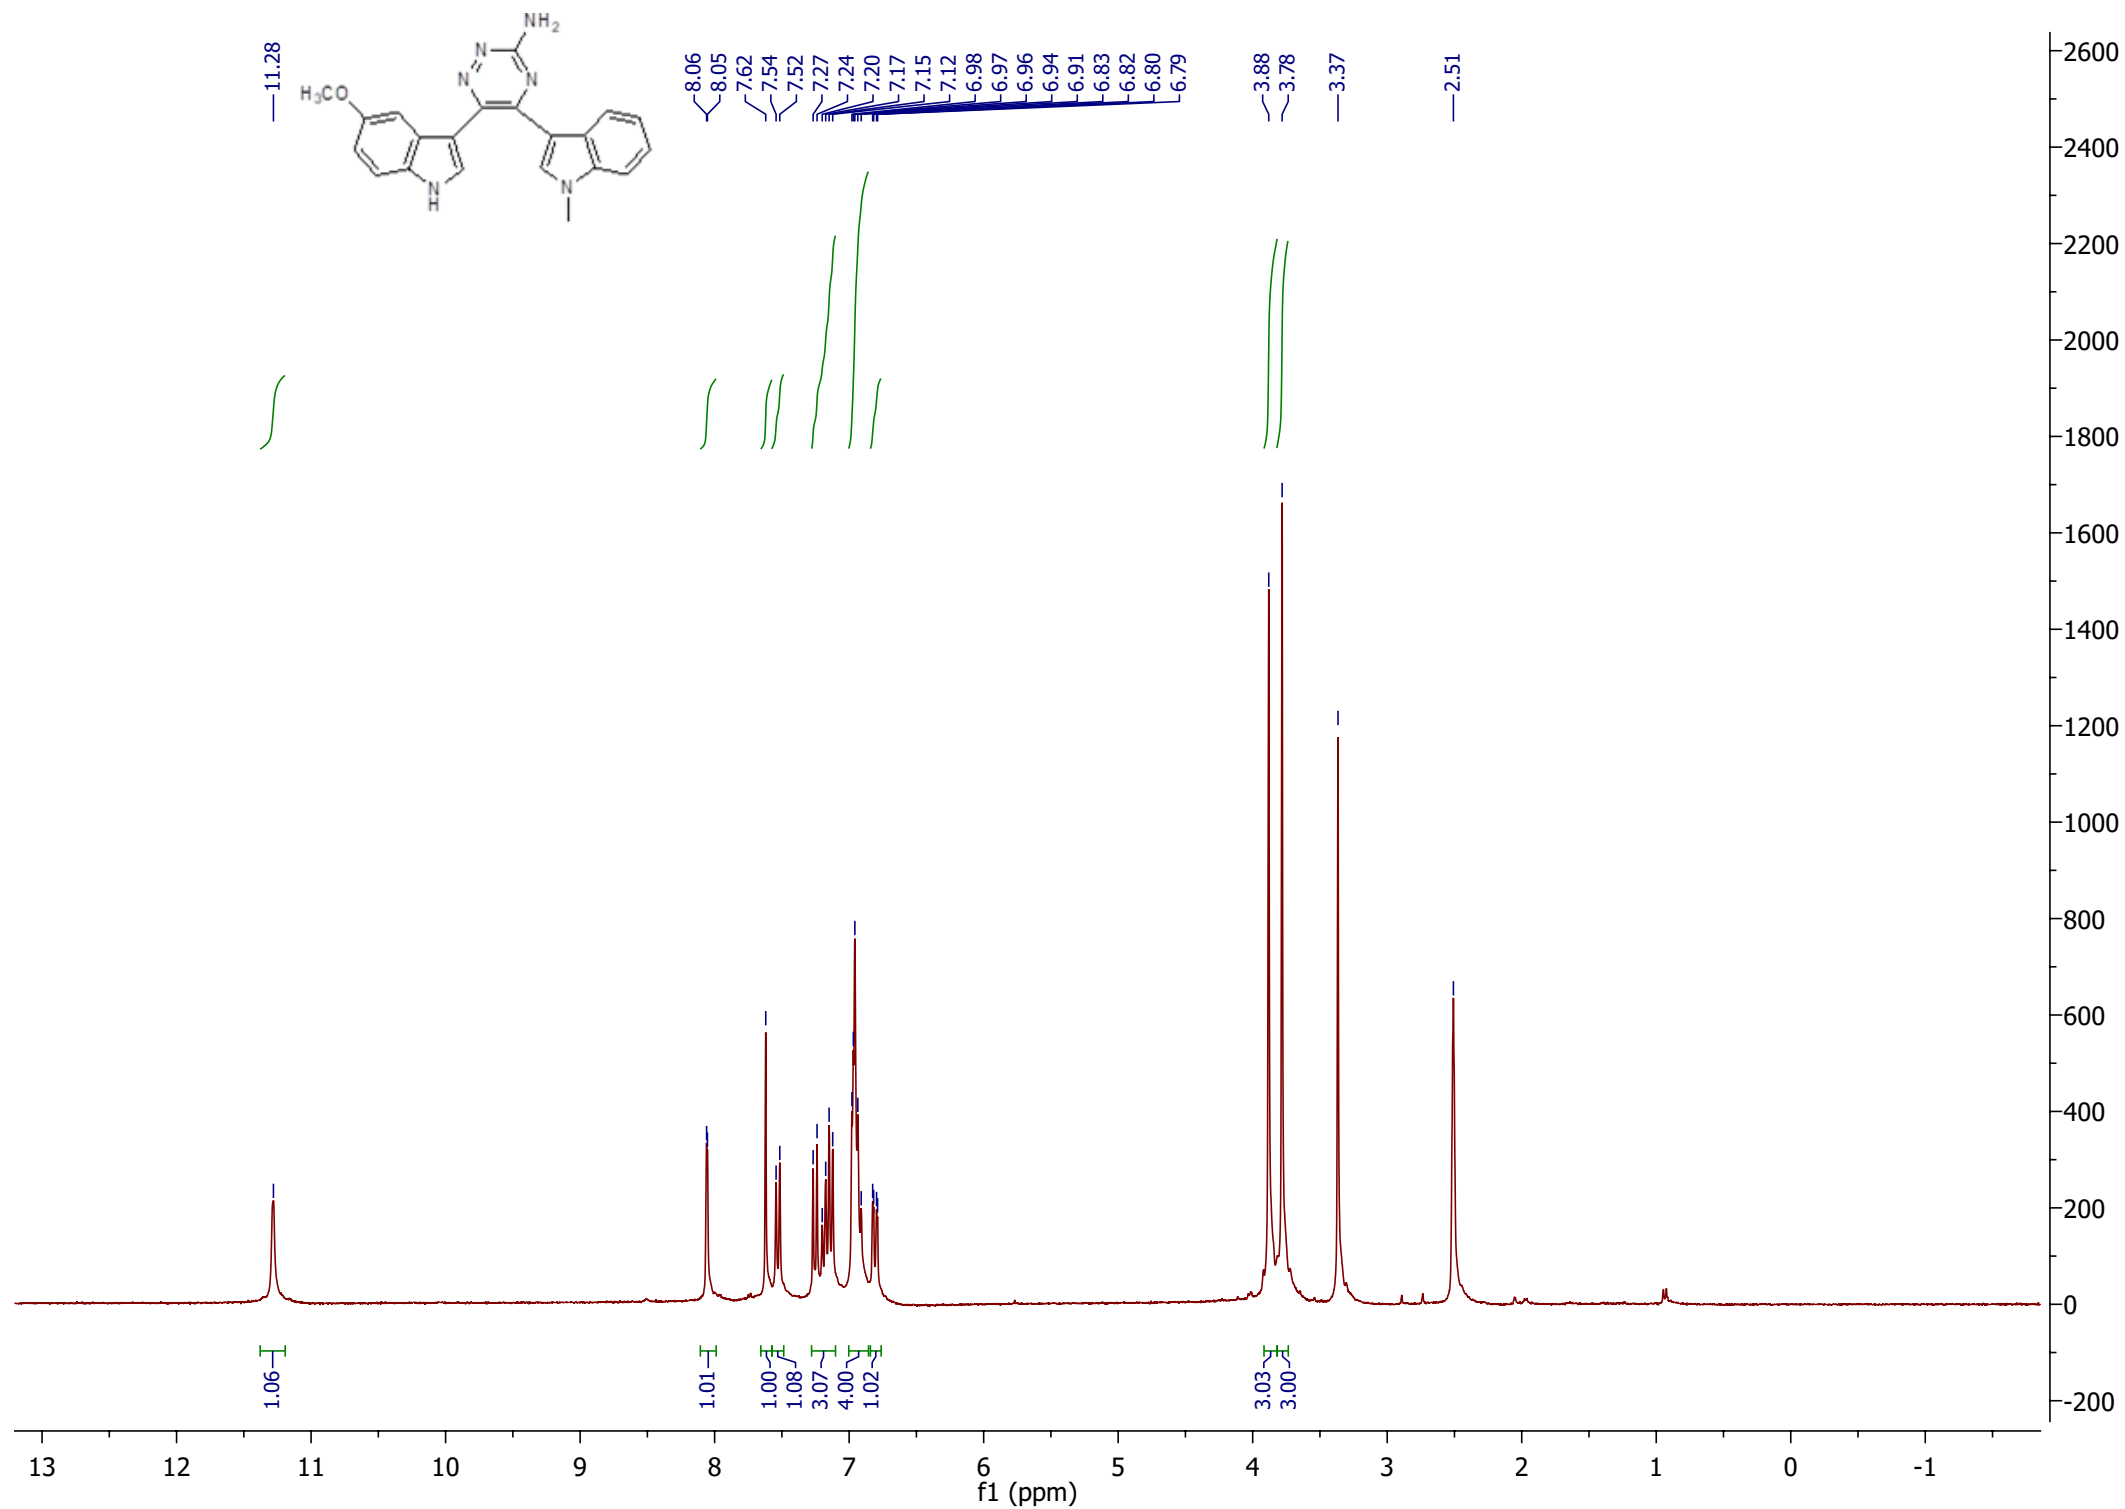

Figure S44:  $^1\text{H}$  NMR spectrum of compound **5z**

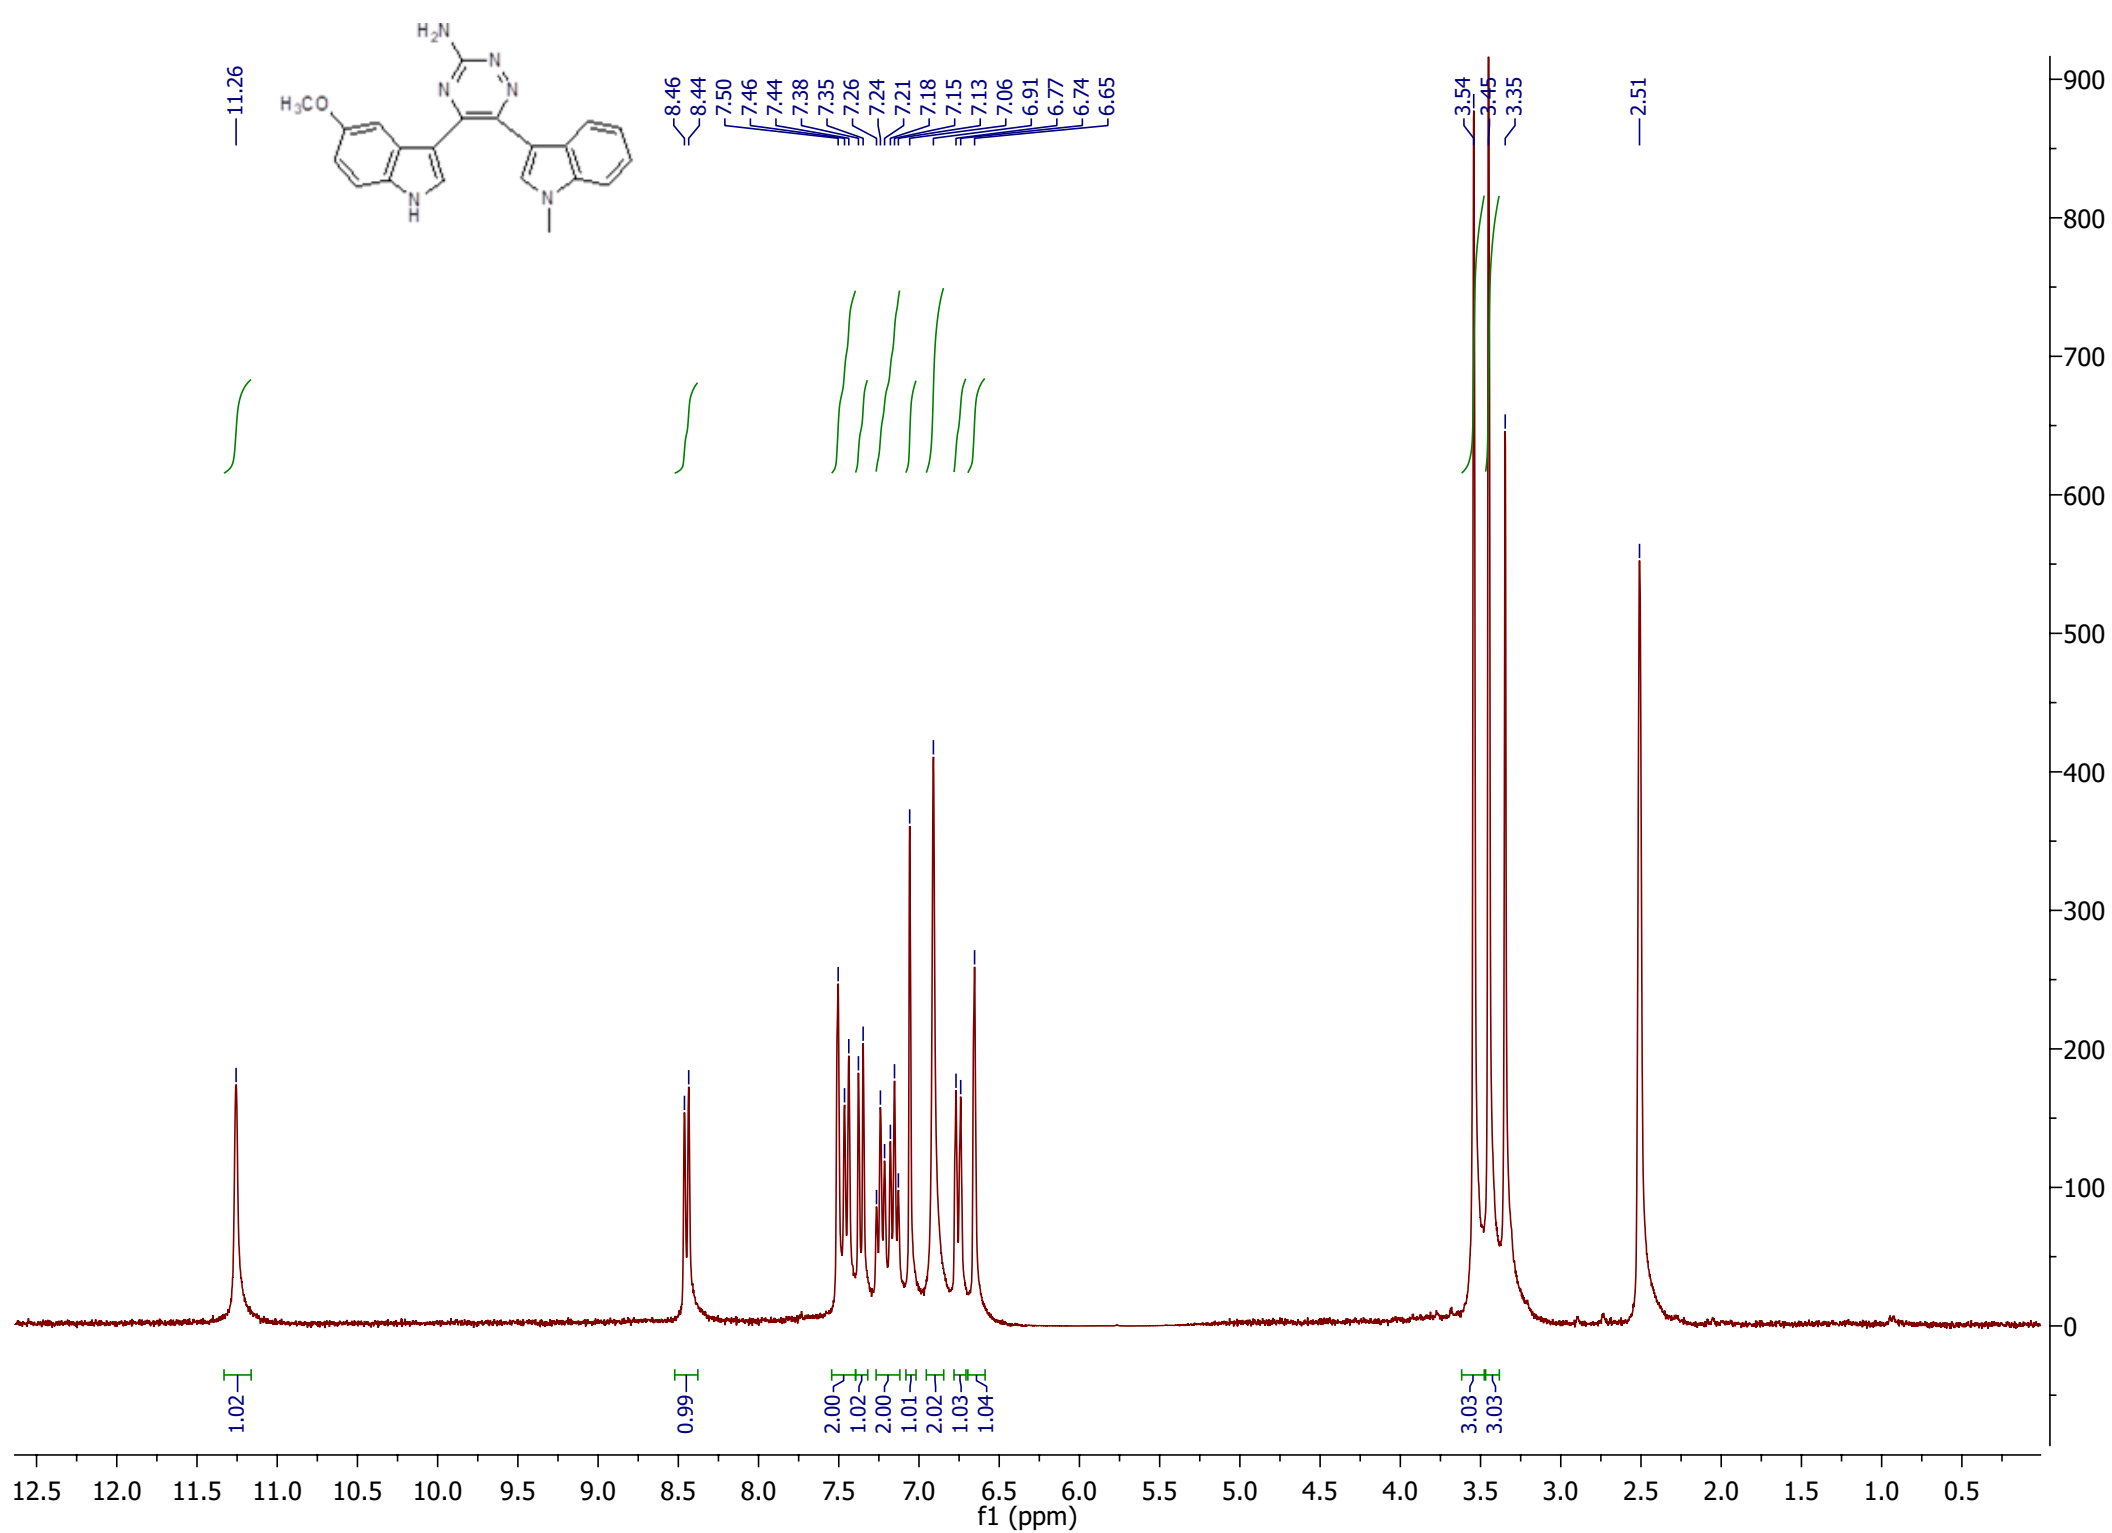

Figure S45:  $^1\text{H}$  NMR spectrum of compound **6z**

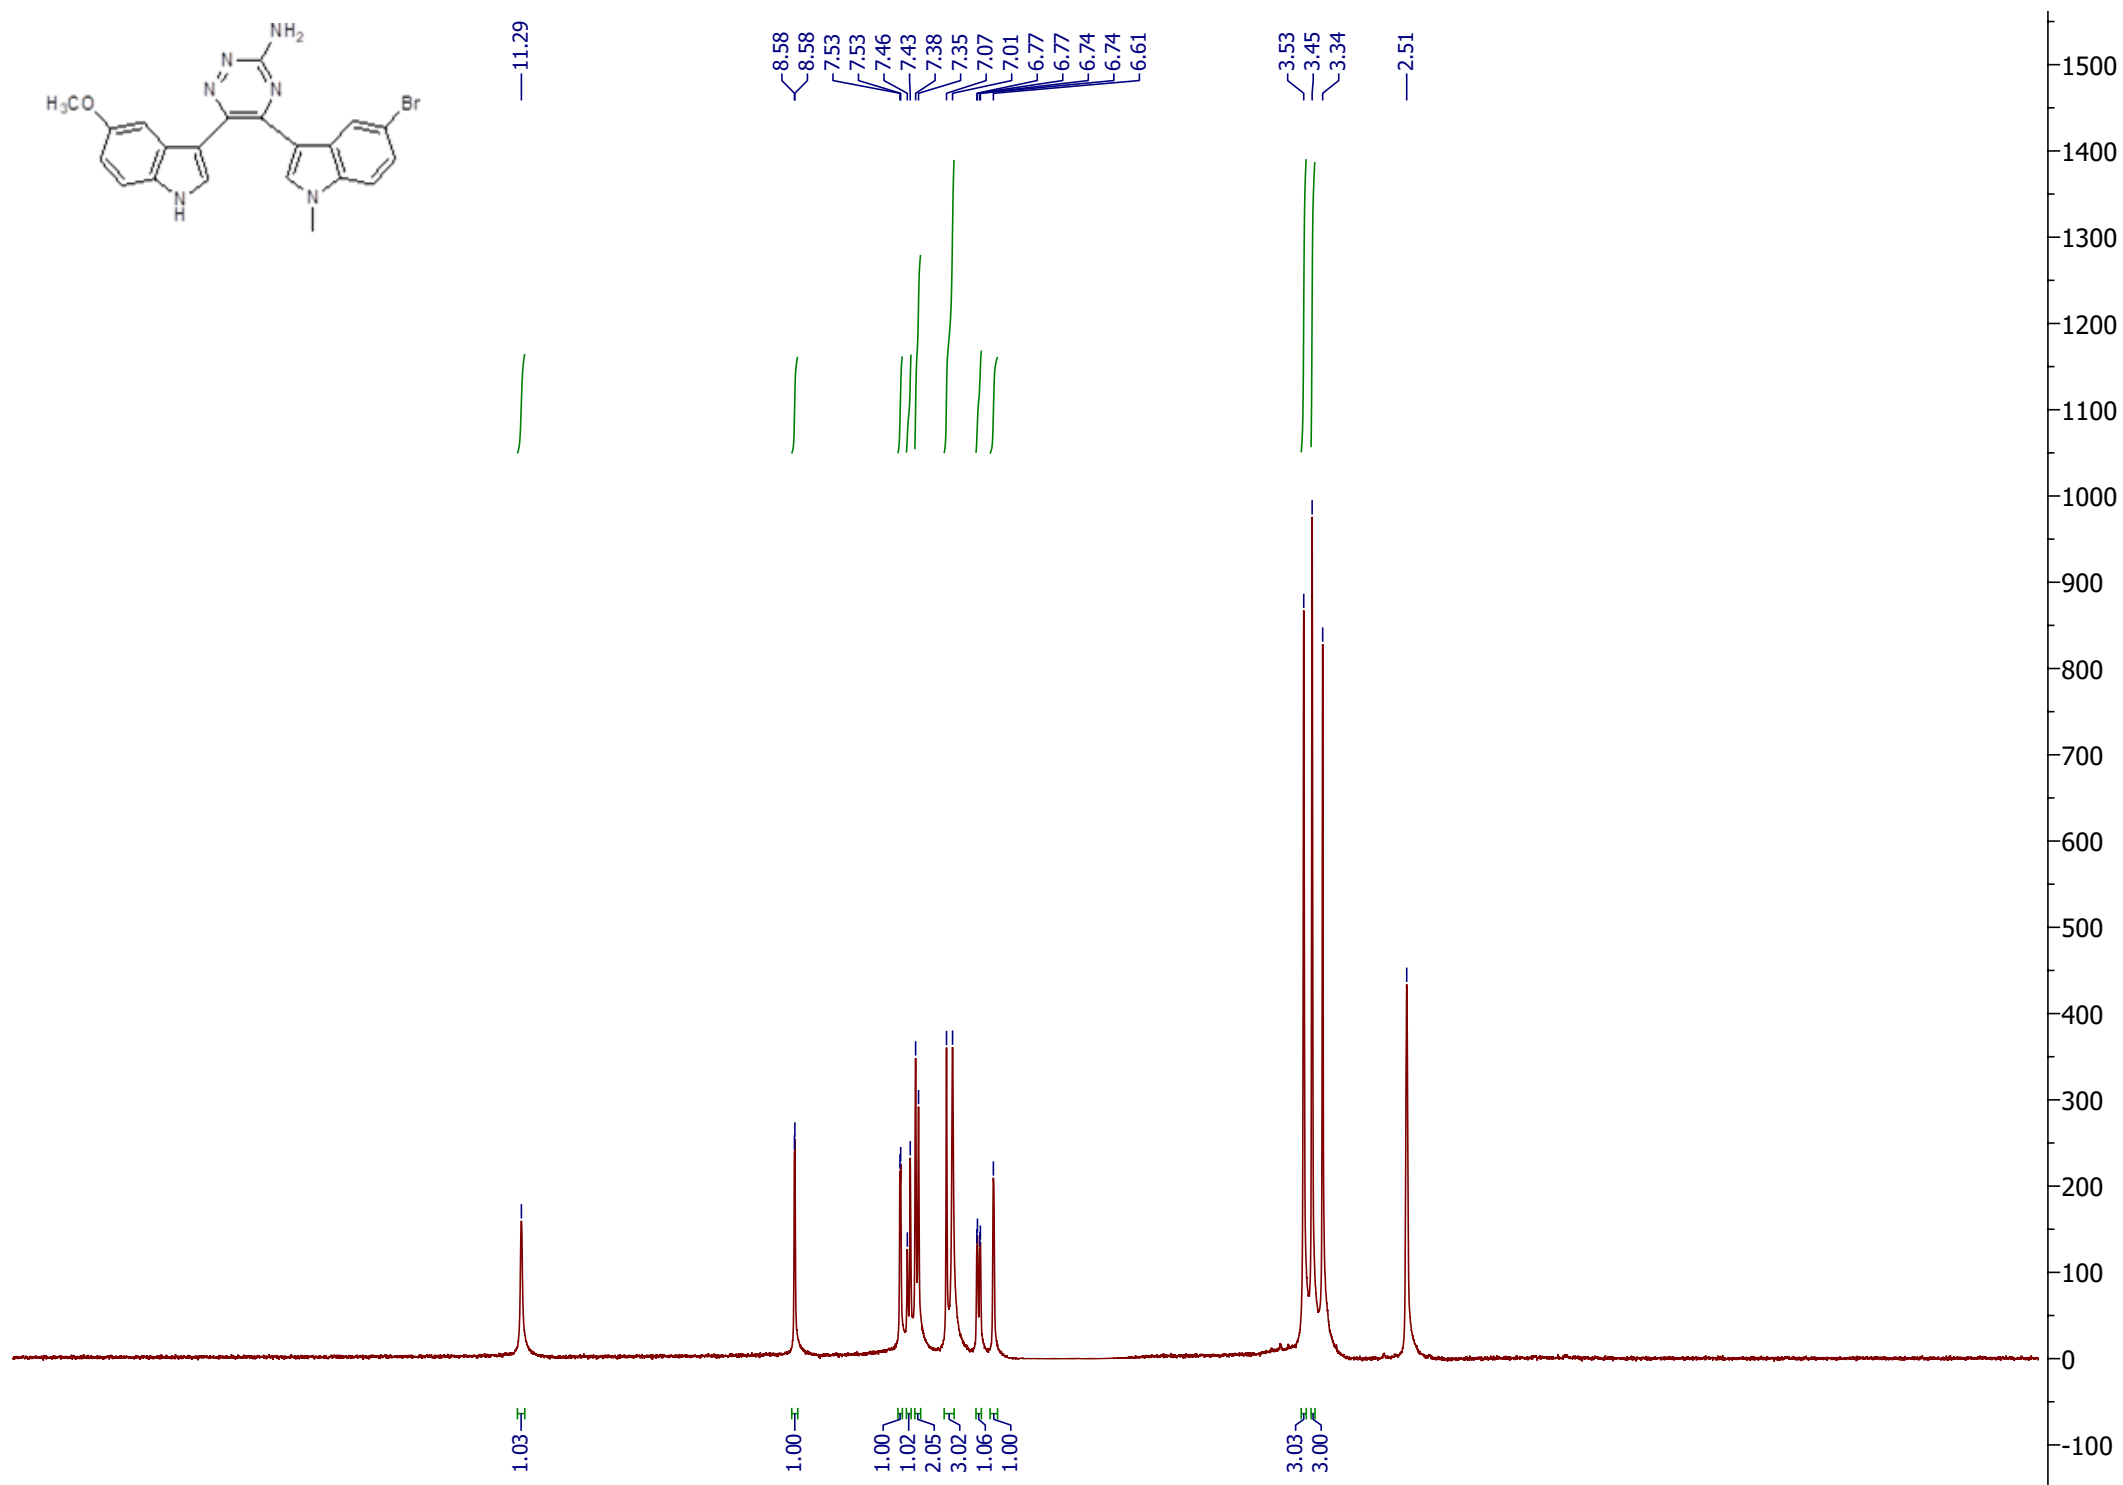

**Figure S46:**  $^1\text{H}$  NMR spectrum of compound **5aa**

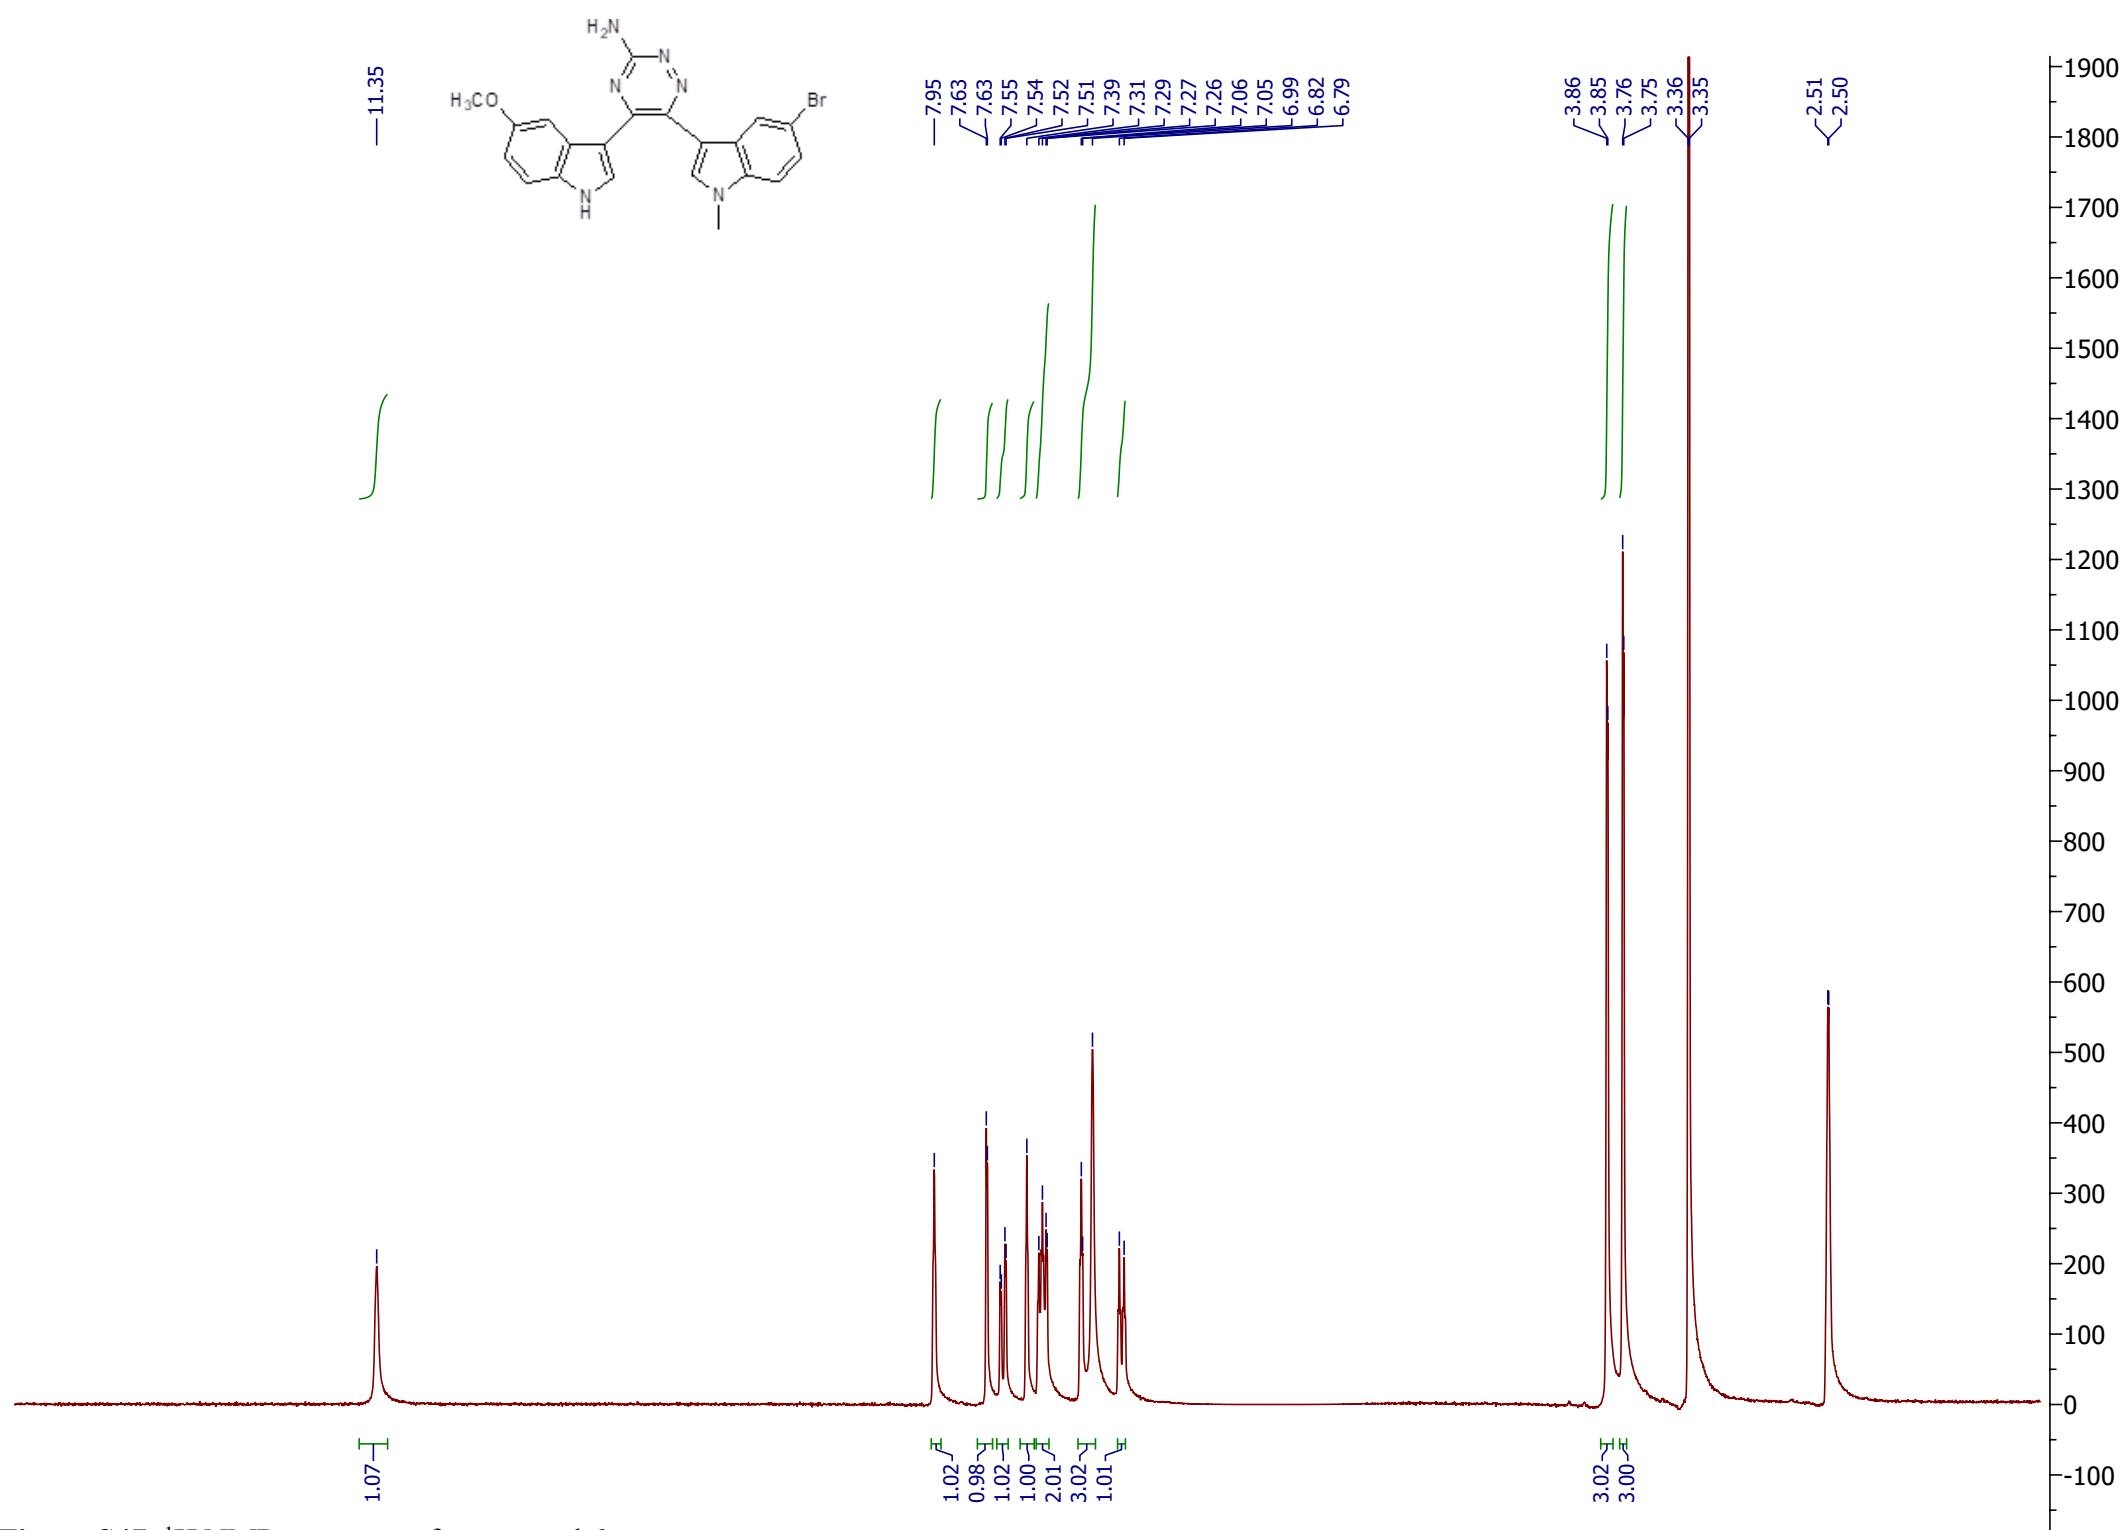

**Figure S47:**  $^1\text{H}$  NMR spectrum of compound **6aa**

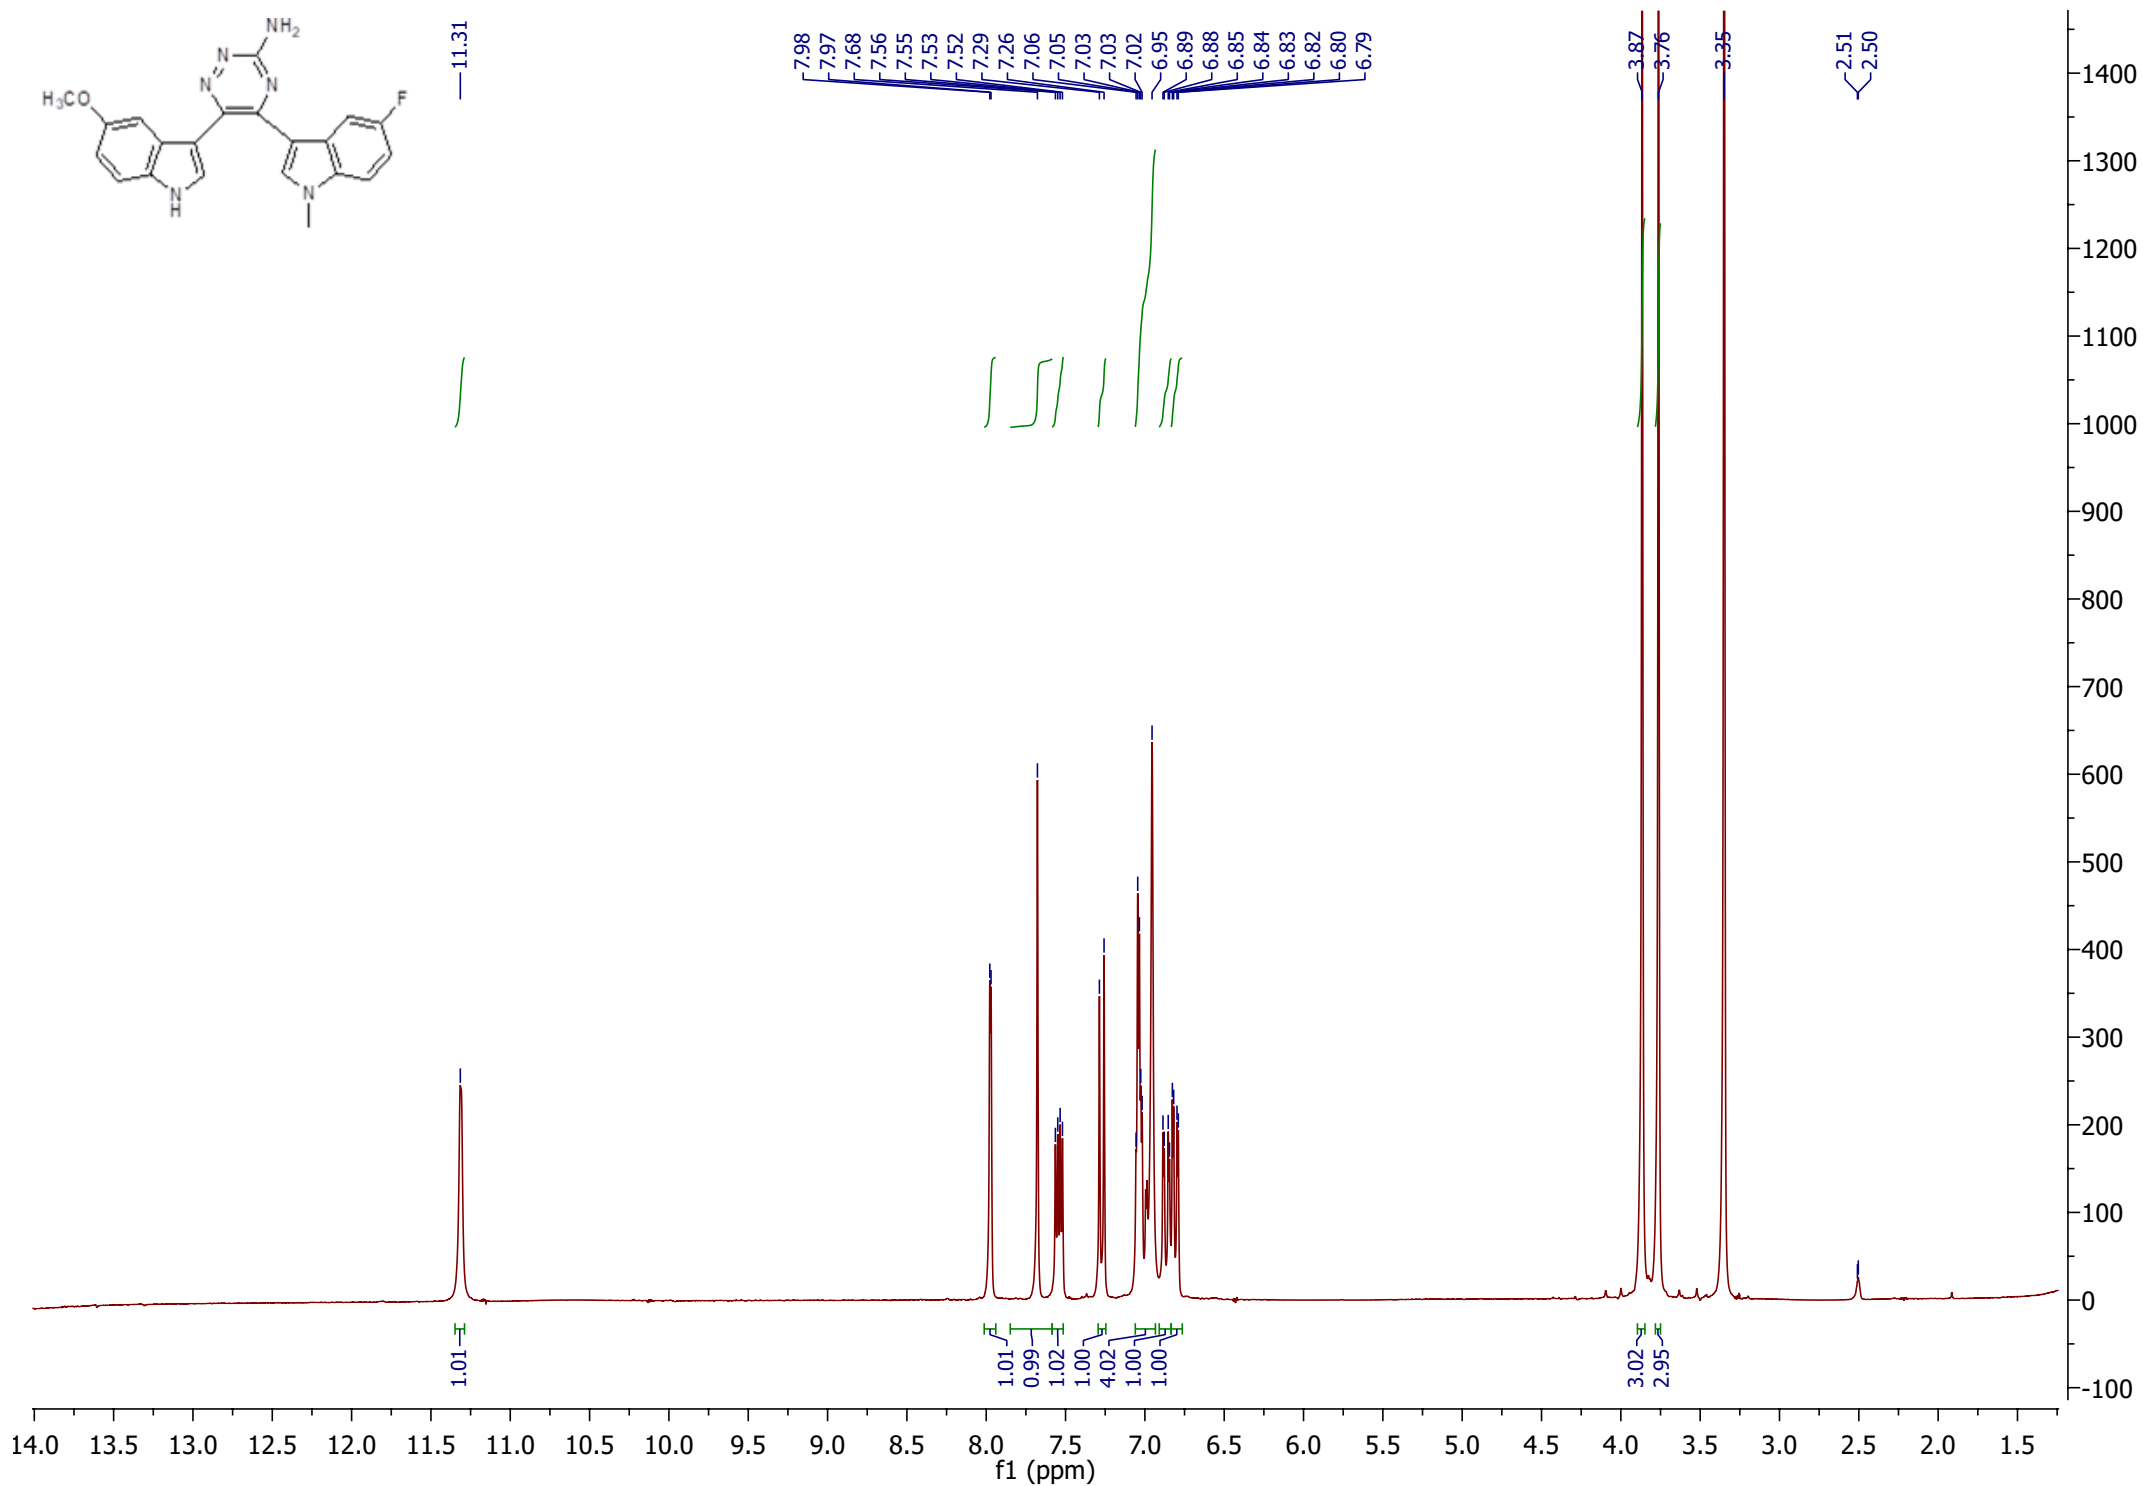

Figure S48: <sup>1</sup>H NMR spectrum of compound **5ab**

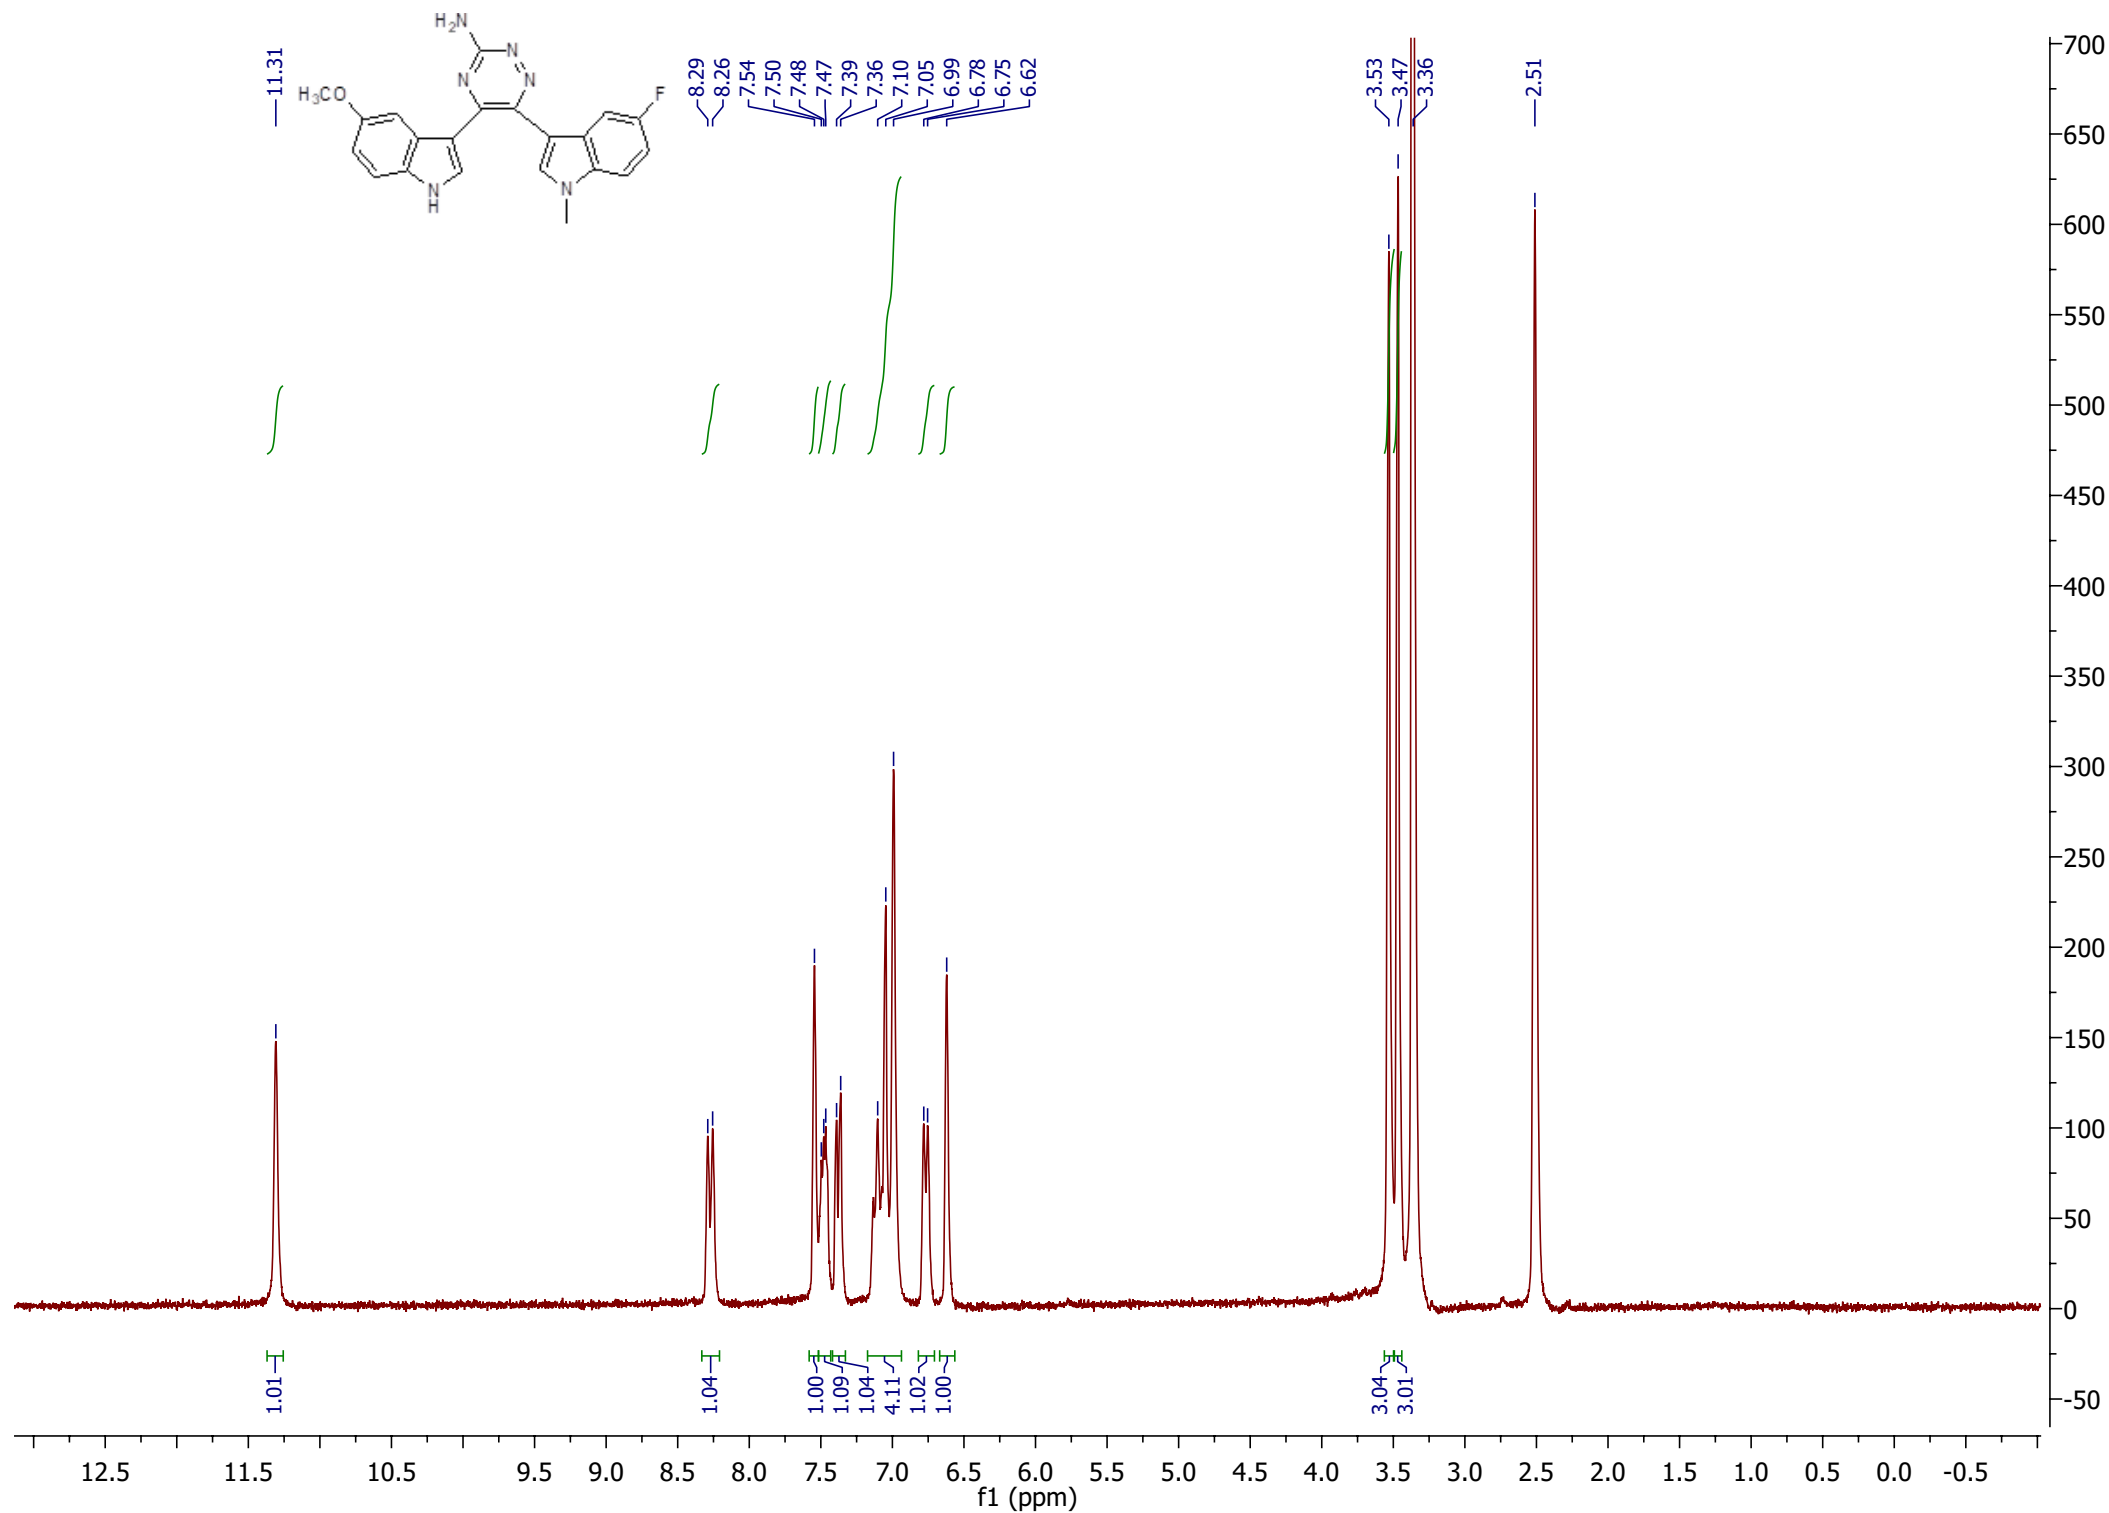

Figure S49:  $^1\text{H}$  NMR spectrum of compound **6ab**

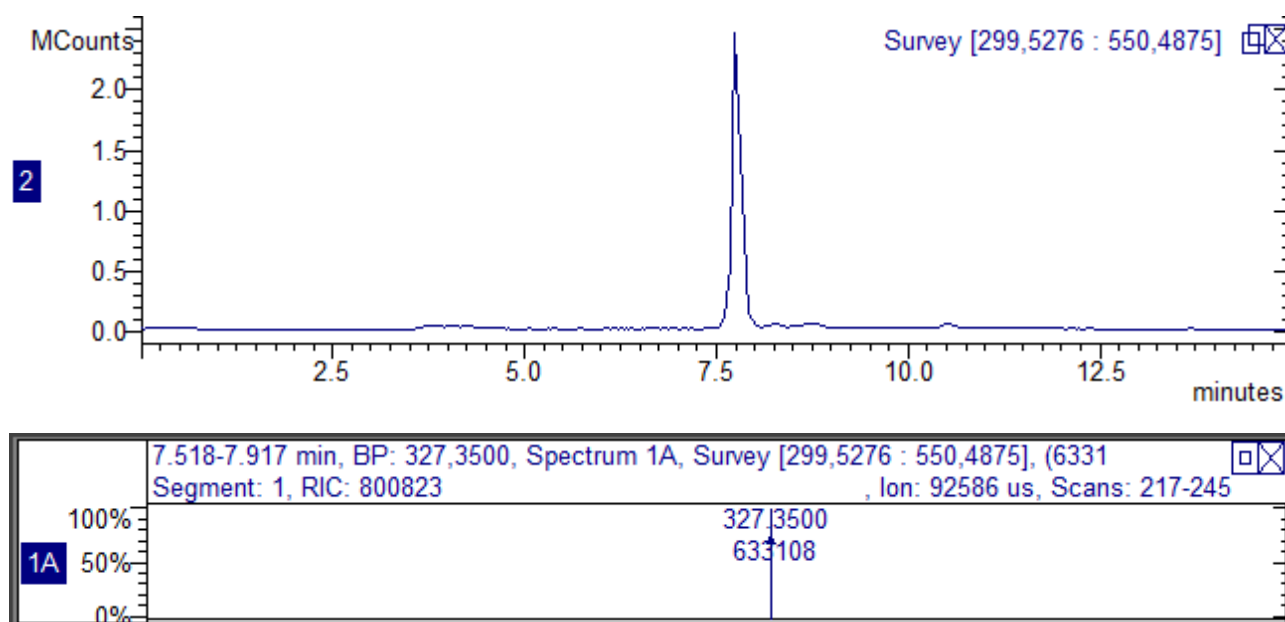

Figure S50: Chromatogram and MS spectrum of compound 5a.

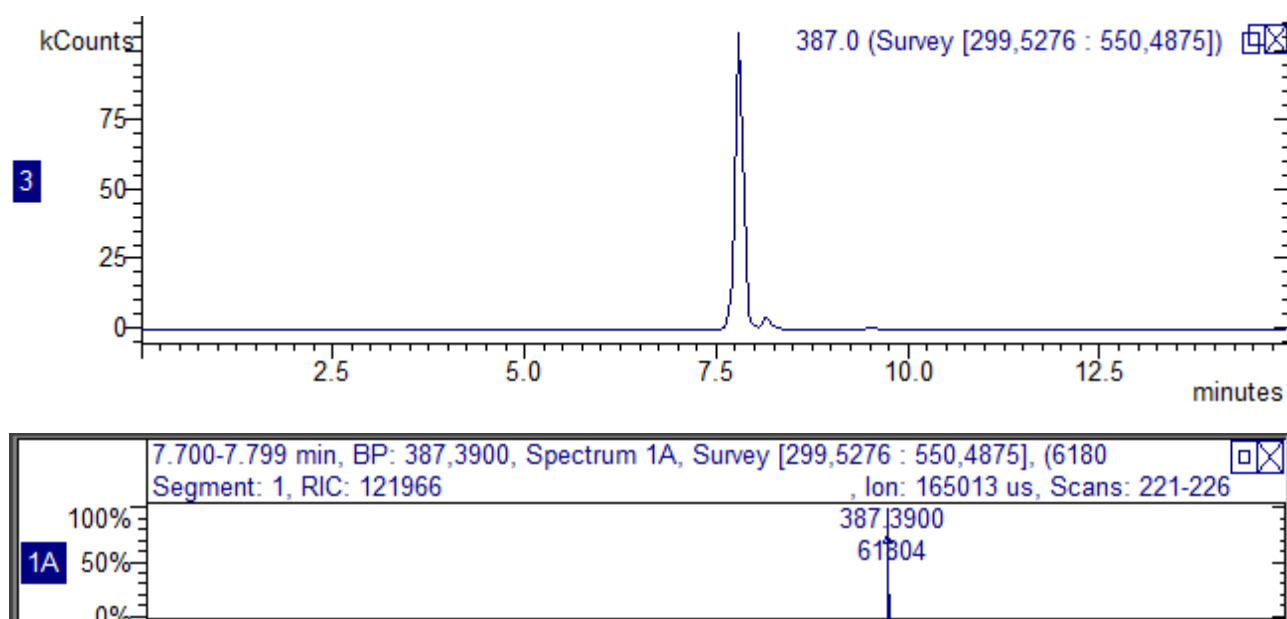

Figure S51: Chromatogram and MS spectrum of compound 5b.



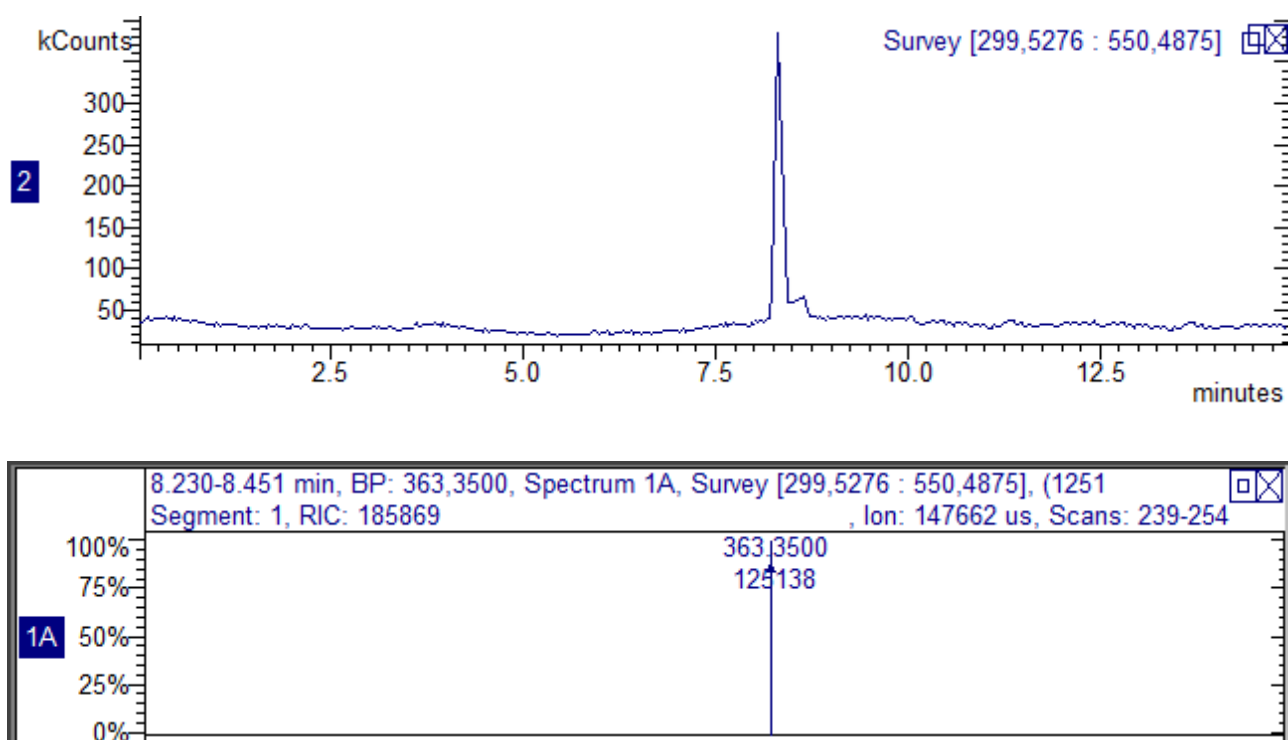

**Figure S52:** Chromatogram and MS spectrum of compound **5c**.

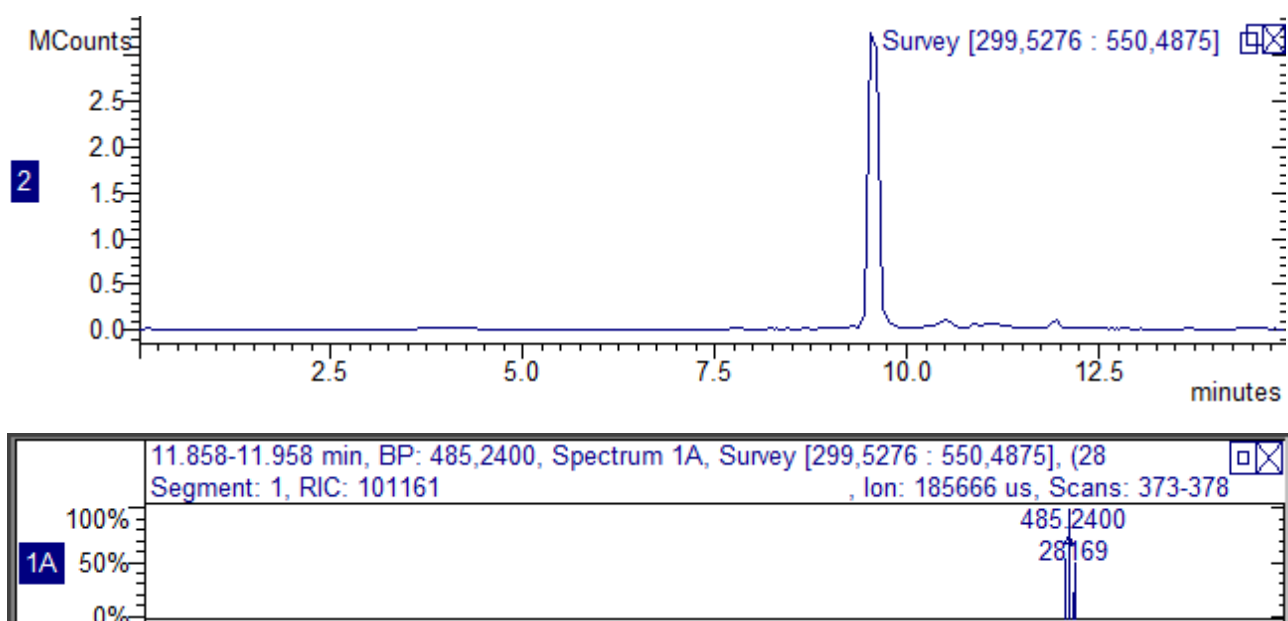

**Figure S53:** Chromatogram and MS spectrum of the compound **5d**.

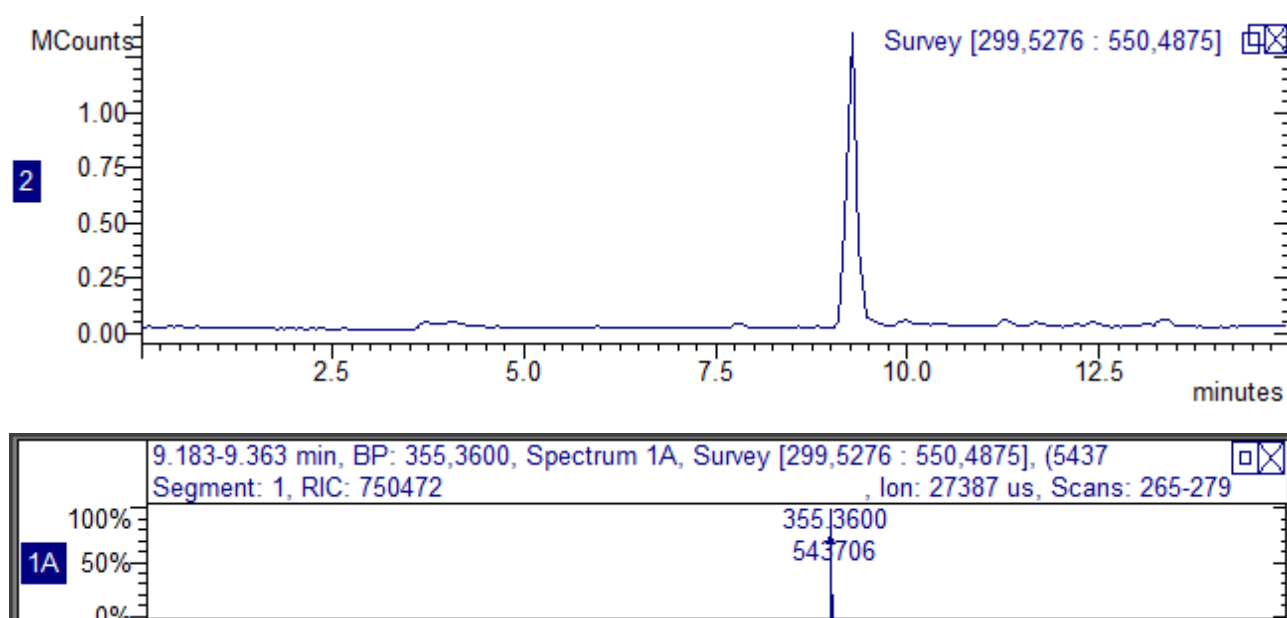

**Figure S54:** Chromatogram and MS spectrum of compound **5e**.

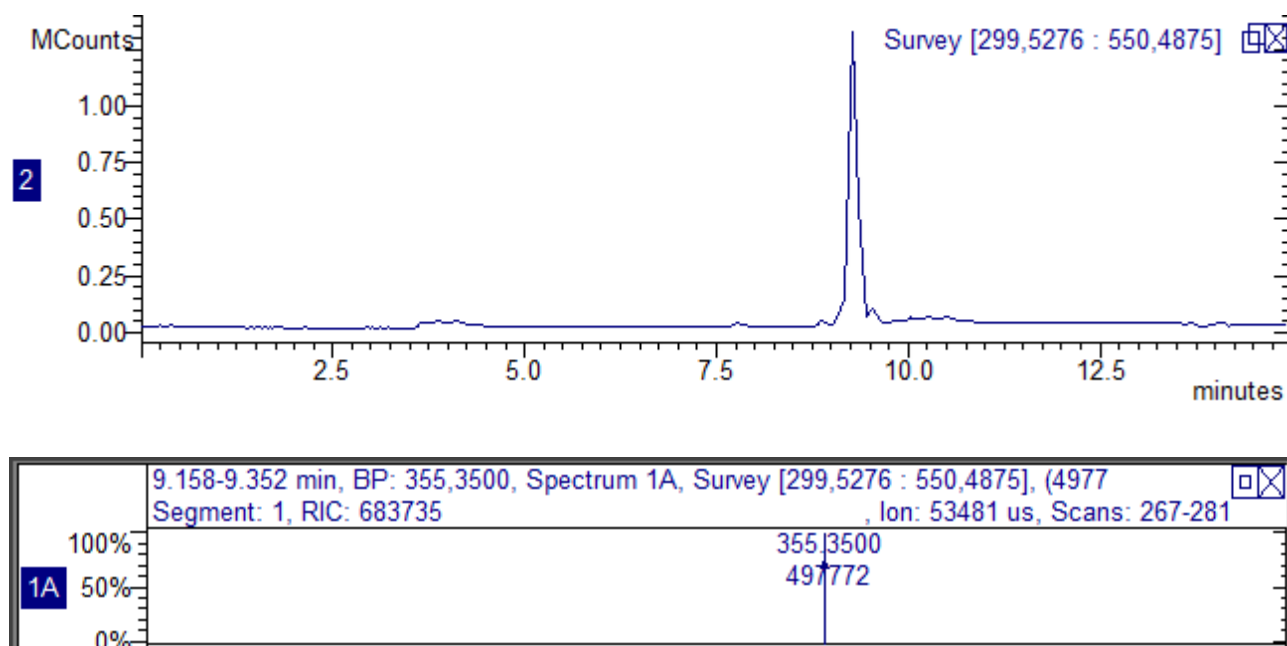

**Figure S55:** Chromatogram and MS spectrum of compound **5f**.

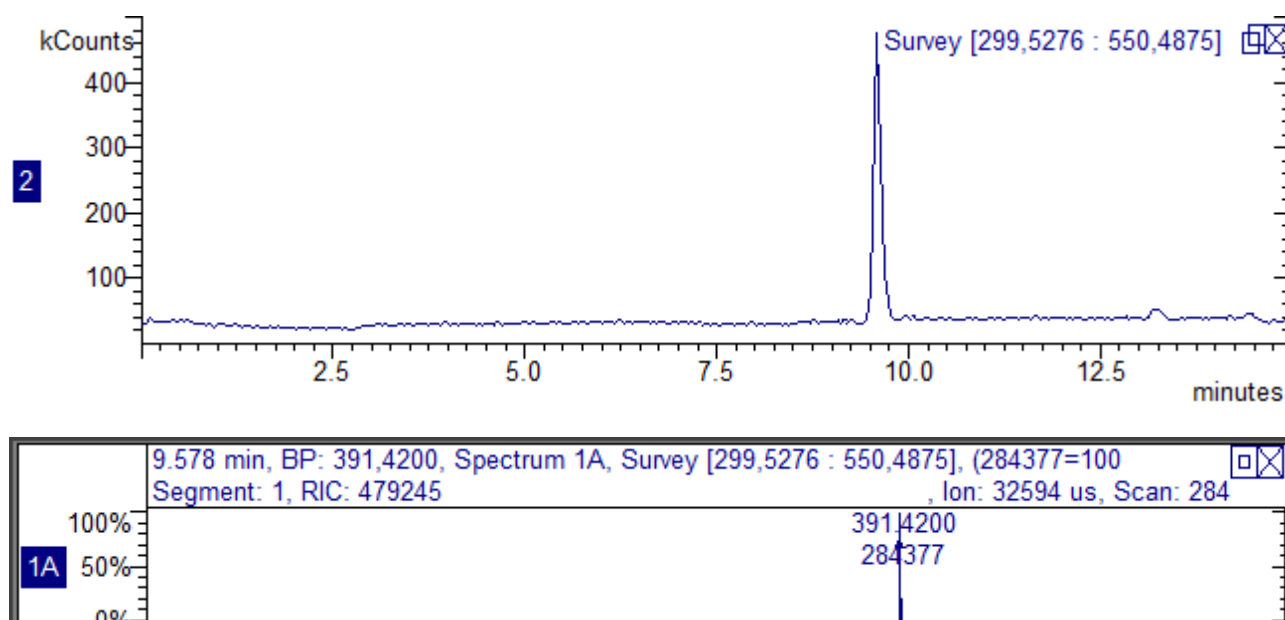

**Figure S56:** Chromatogram and MS spectrum of compound **5g**.

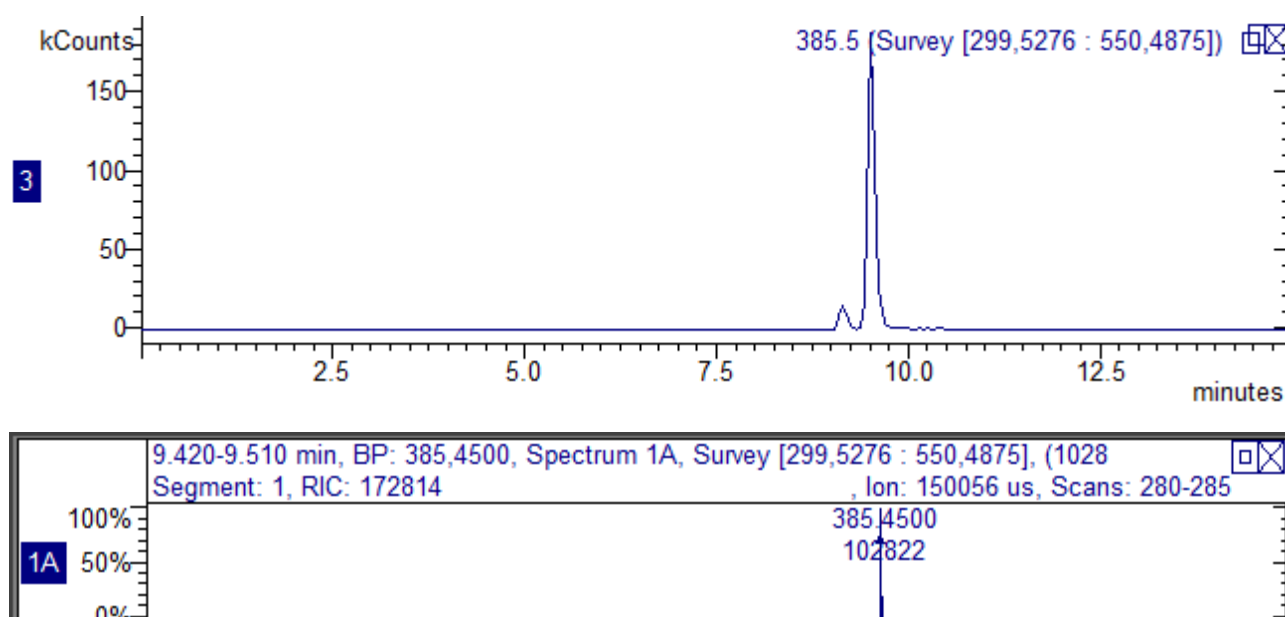

**Figure S57:** Chromatogram and MS spectrum of compound **5h**.

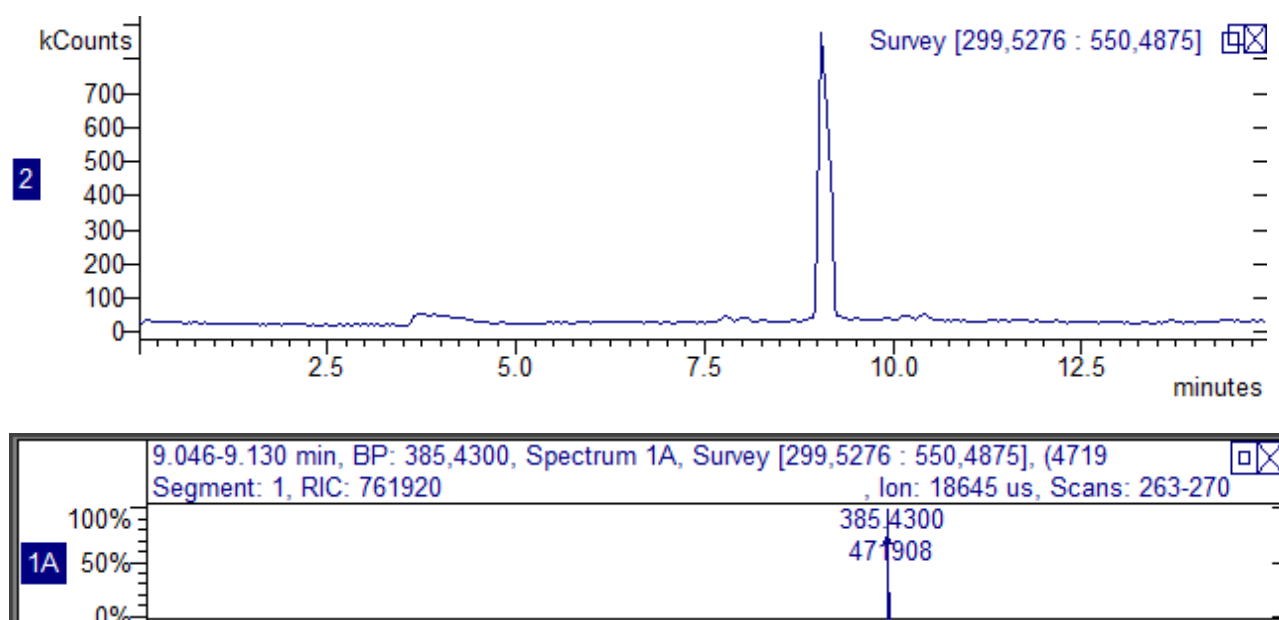

**Figure S58:** Chromatogram and MS spectrum of compound **6h**.

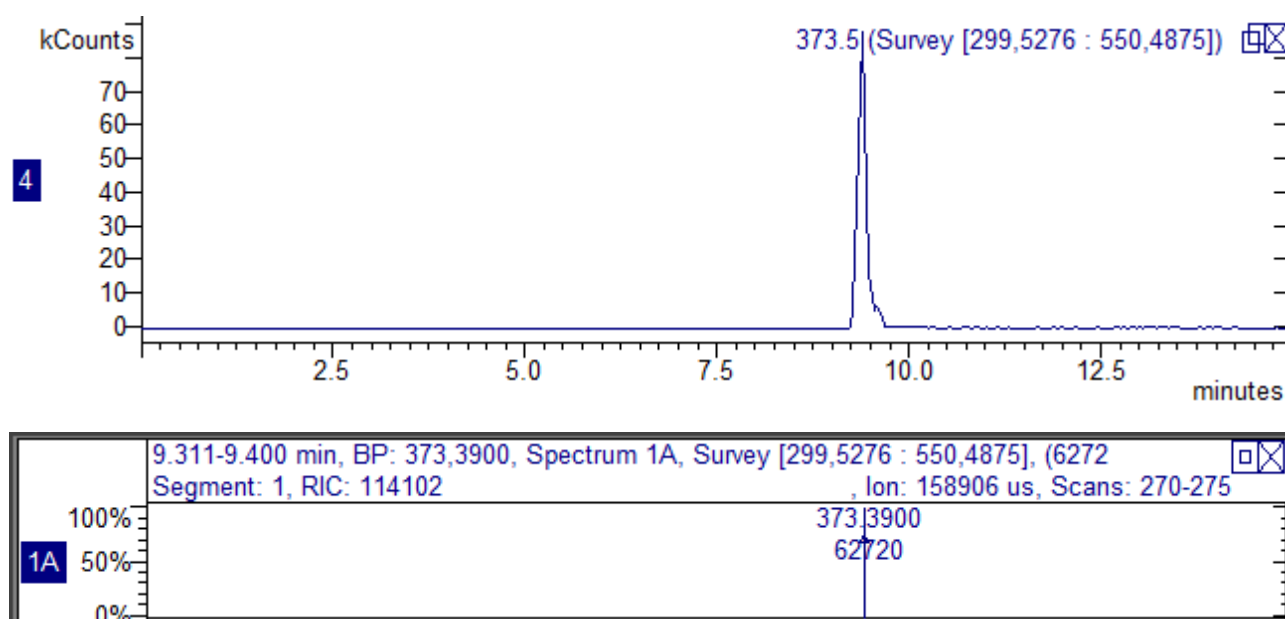

**Figure S59:** Chromatogram and MS spectrum of compound **5i**.

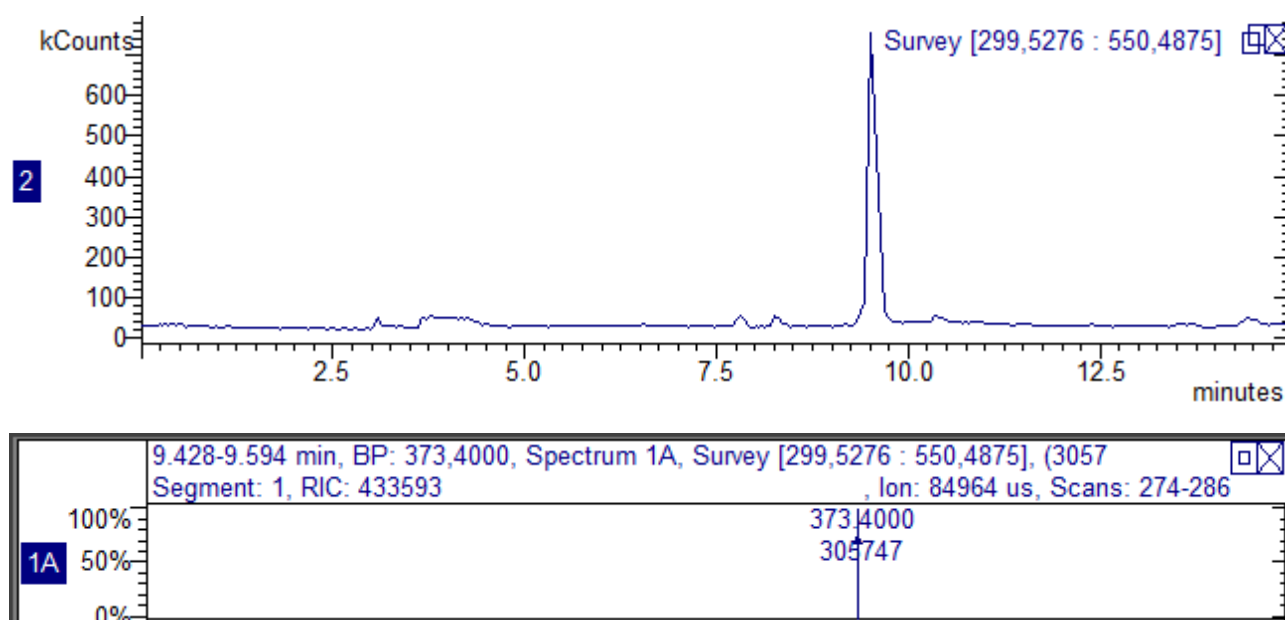

**Figure S60:** Chromatogram and MS spectrum of compound **6i**.

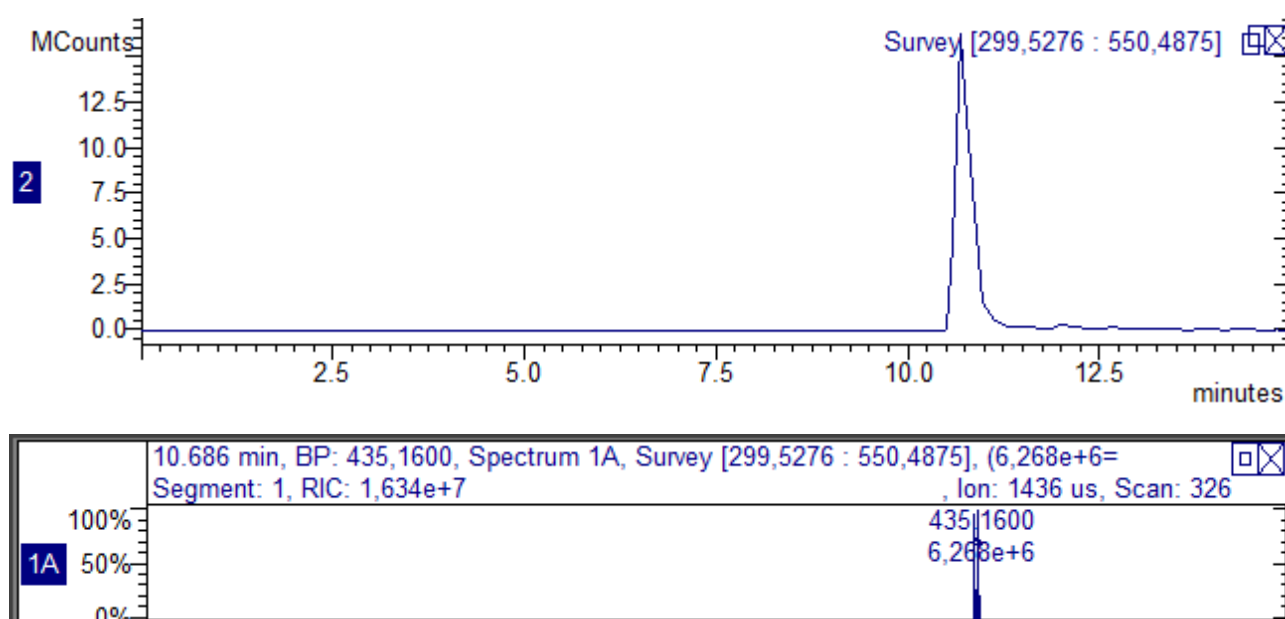

**Figure S61:** Chromatogram and MS spectrum of the compound **5j**.

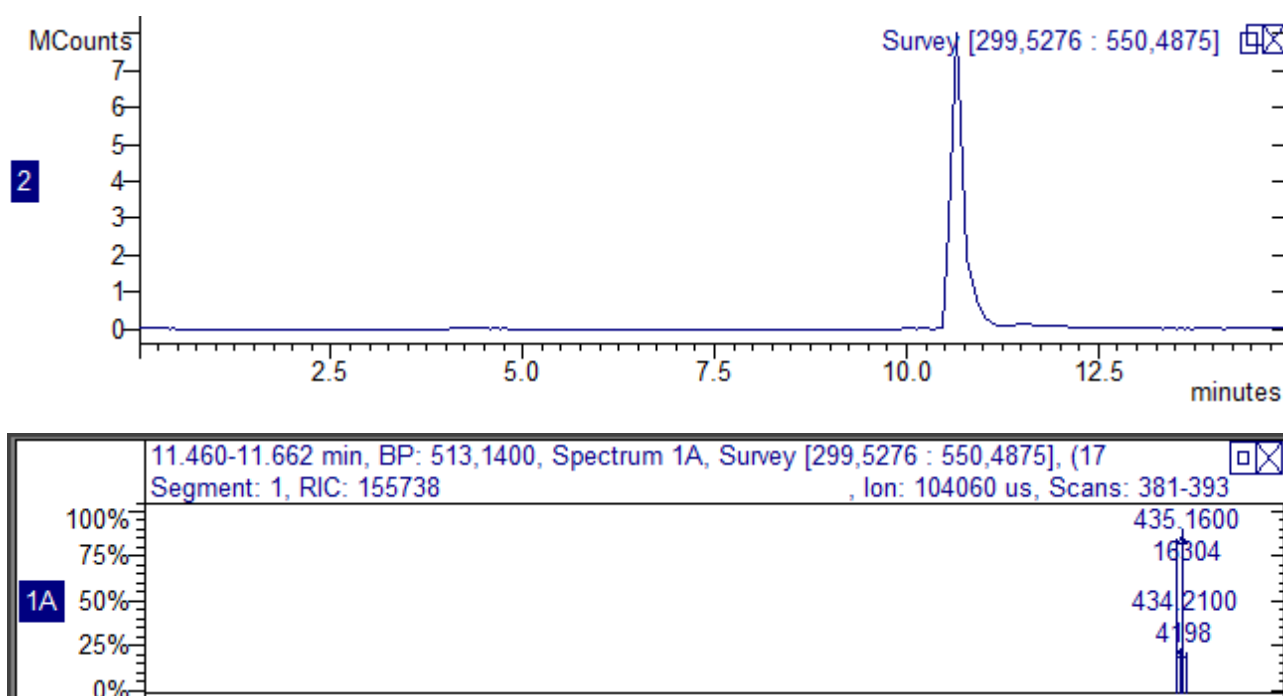

**Figure S62:** Chromatogram and MS spectrum of the compound **6j**.

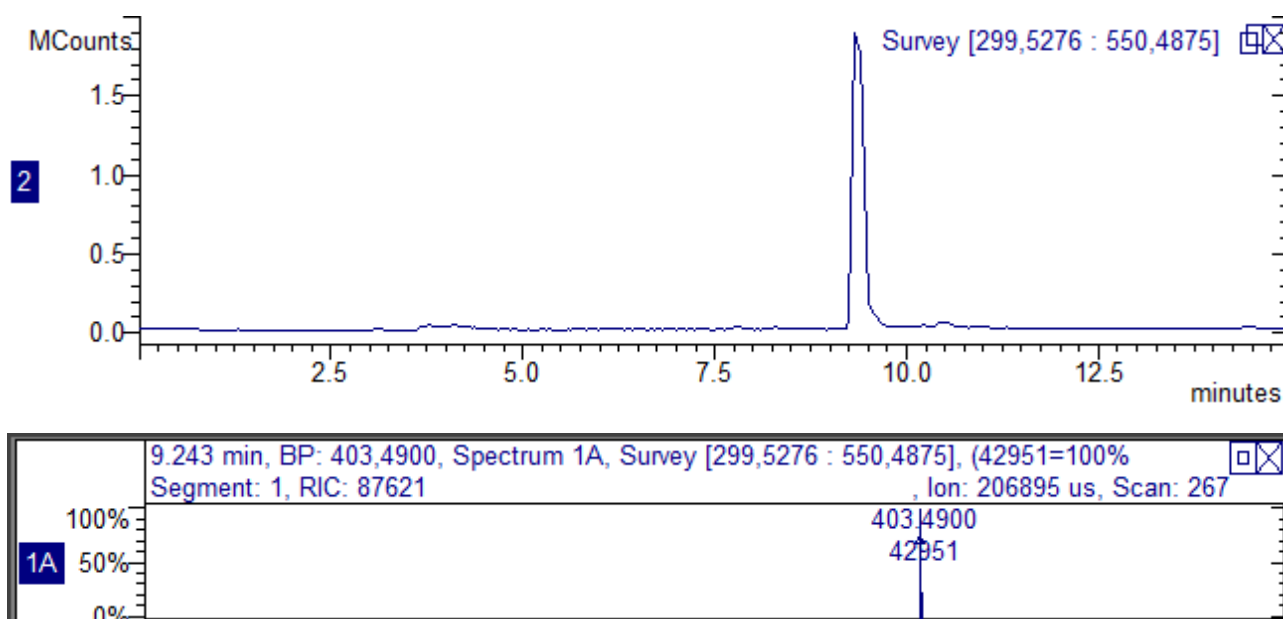

**Figure S63:** Chromatogram and MS spectrum of compound **5k**.

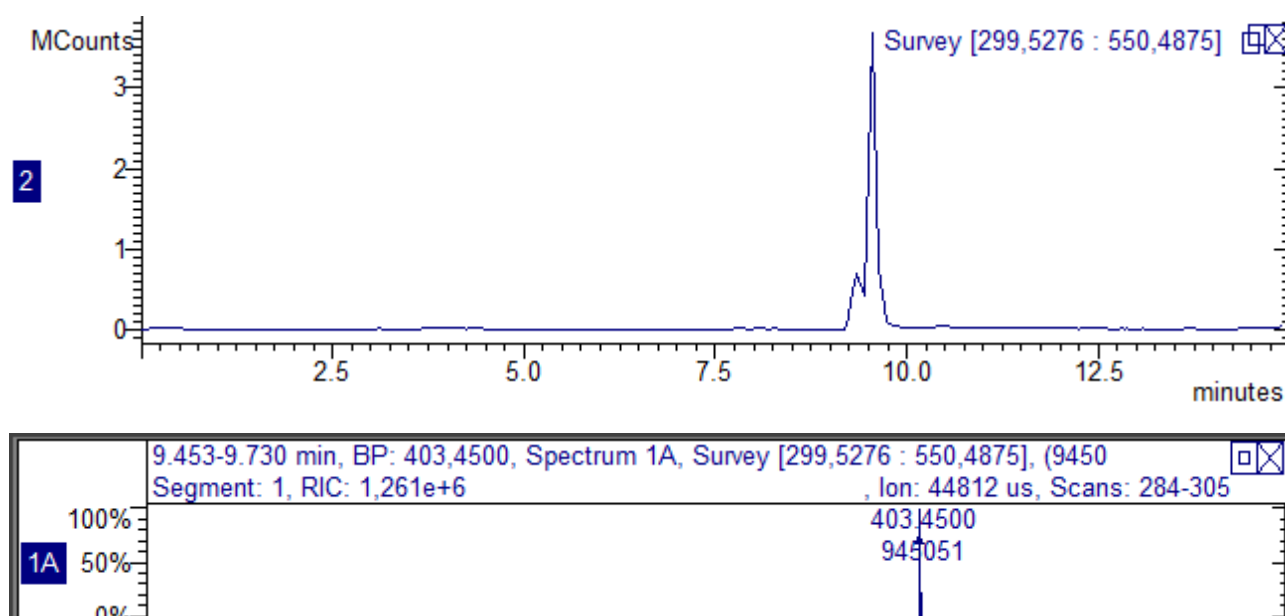

**Figure S64:** Chromatogram and MS spectrum of compound **6k**.

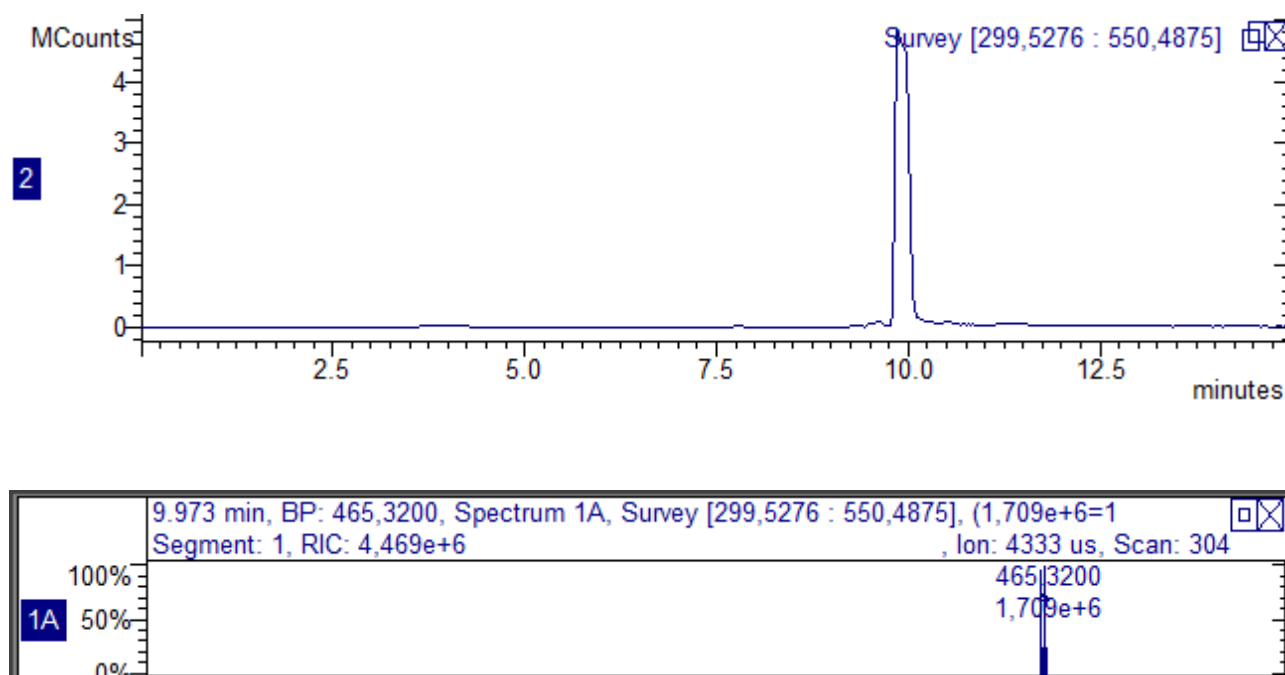

**Figure S65:** Chromatogram and MS spectrum of the compound **5l**.

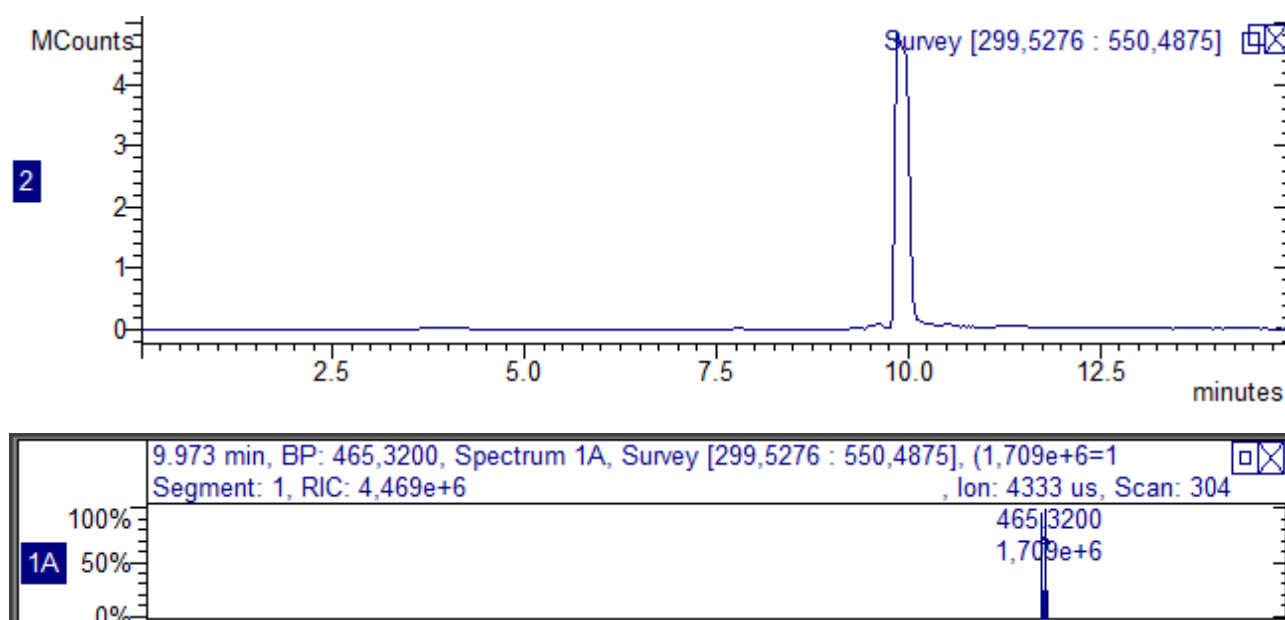

**Figure S66:** Chromatogram and MS spectrum of the compound **6l**.

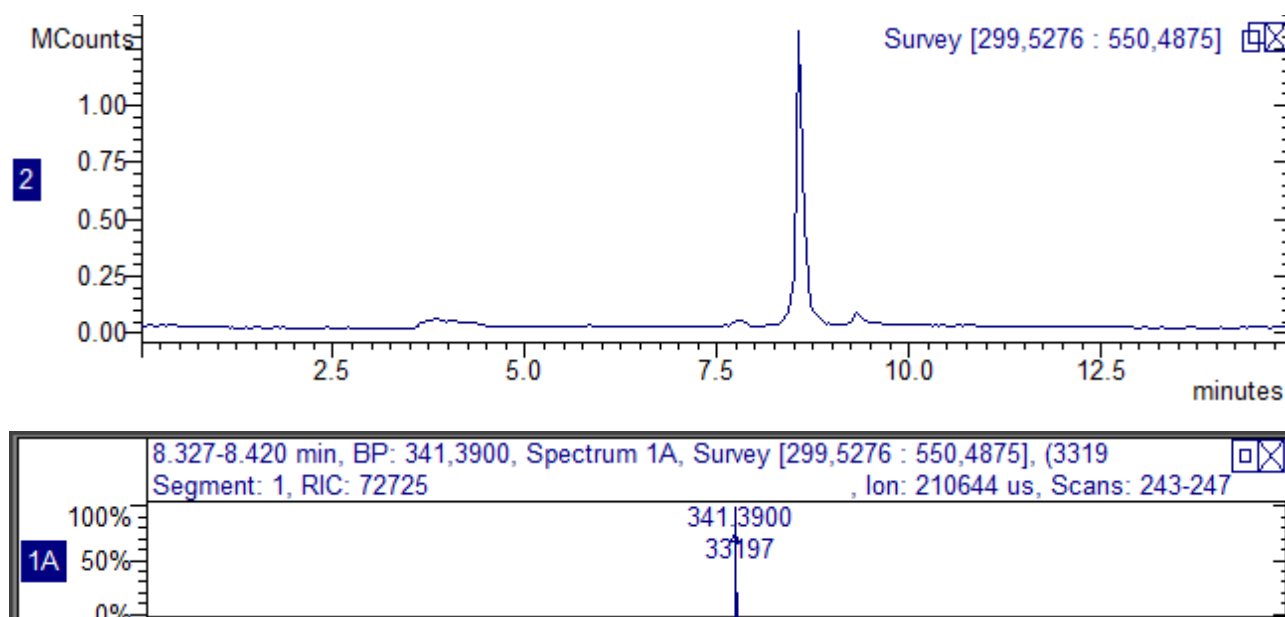

**Figure S67:** Chromatogram and MS spectrum of compound **5m**.



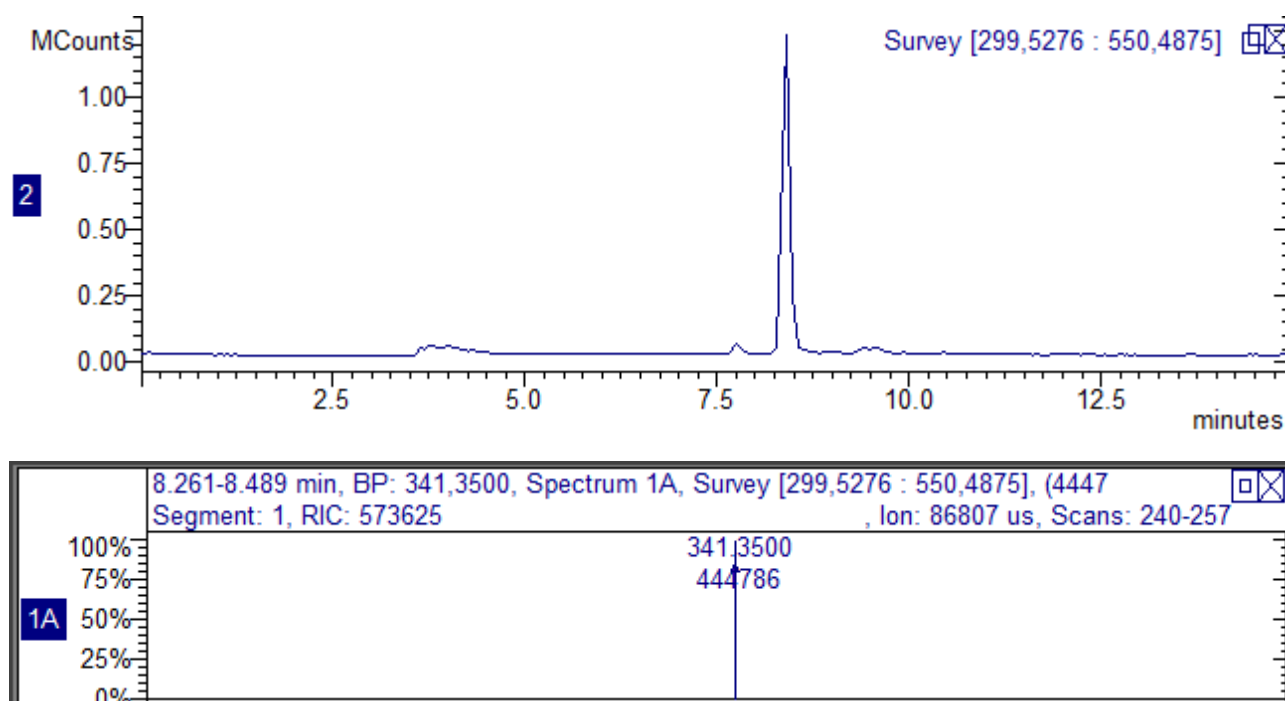

Figure S68: Chromatogram and MS spectrum of compound **6m**.

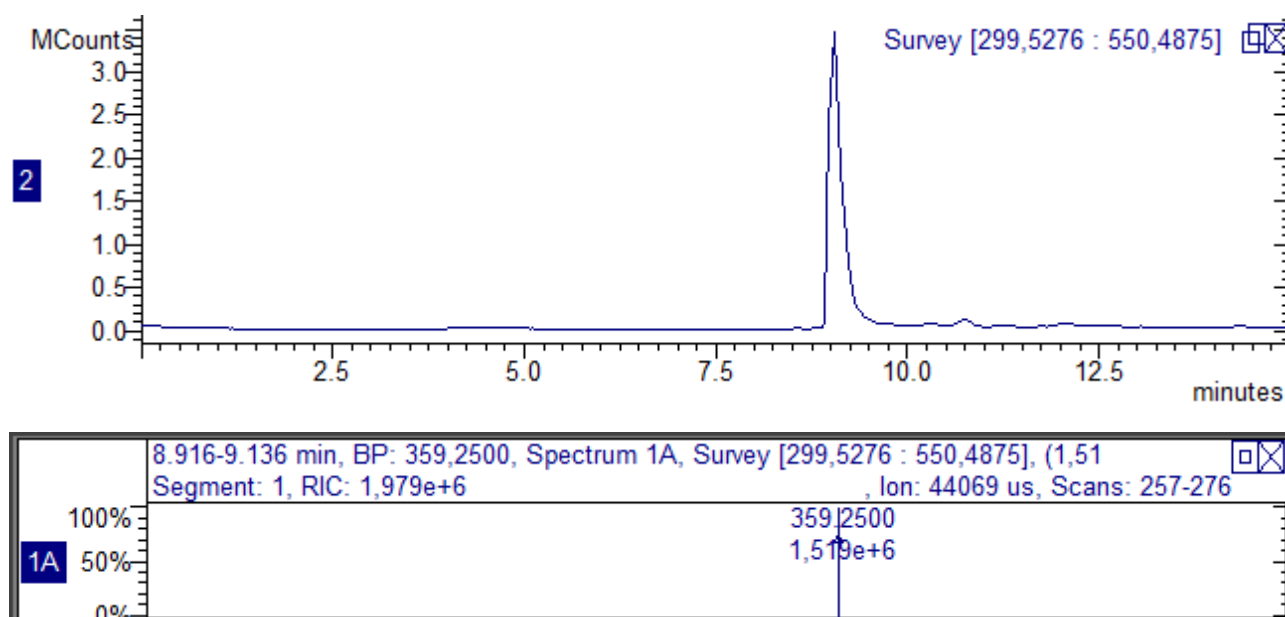

Figure S69: Chromatogram and MS spectrum of compound **5n**.

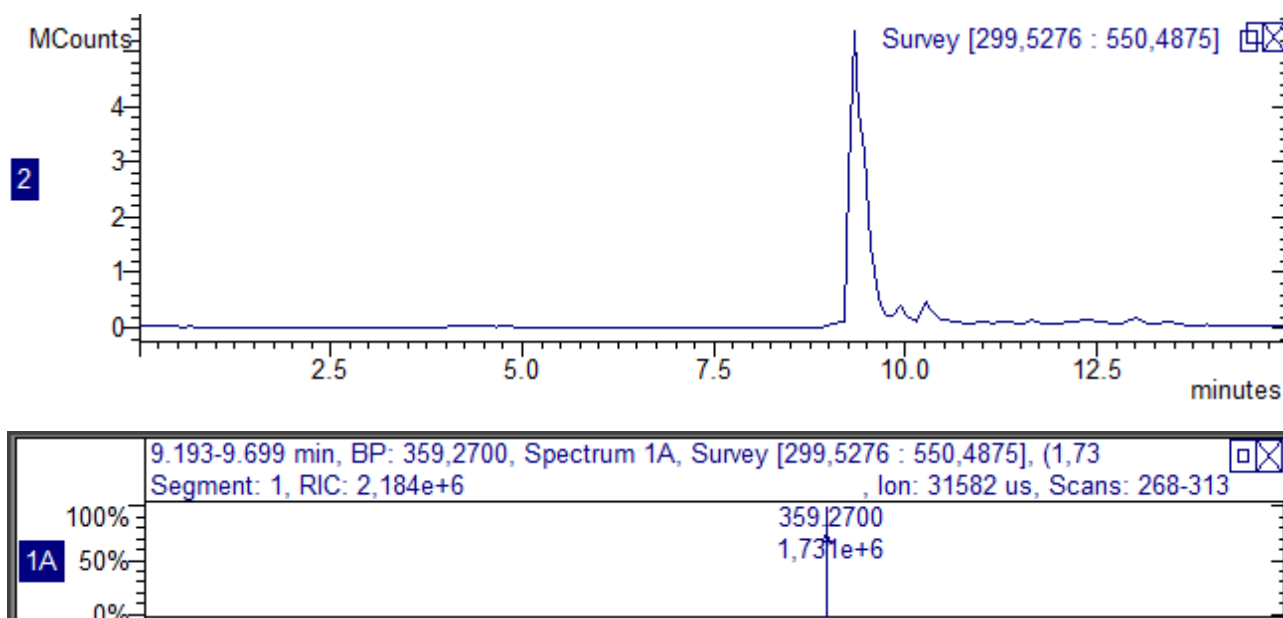

**Figure S70:** Chromatogram and MS spectrum of compound **6n**.

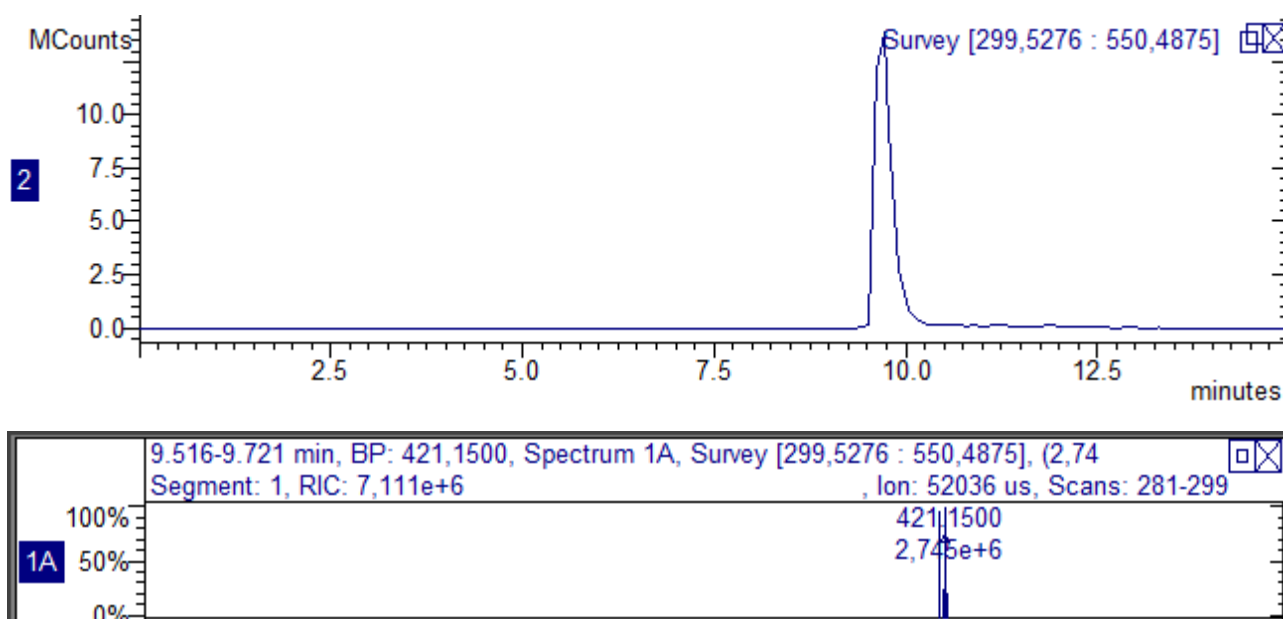

**Figure S71:** Chromatogram and MS spectrum with detail on the isotopic pattern of the bromine compound **5o**.

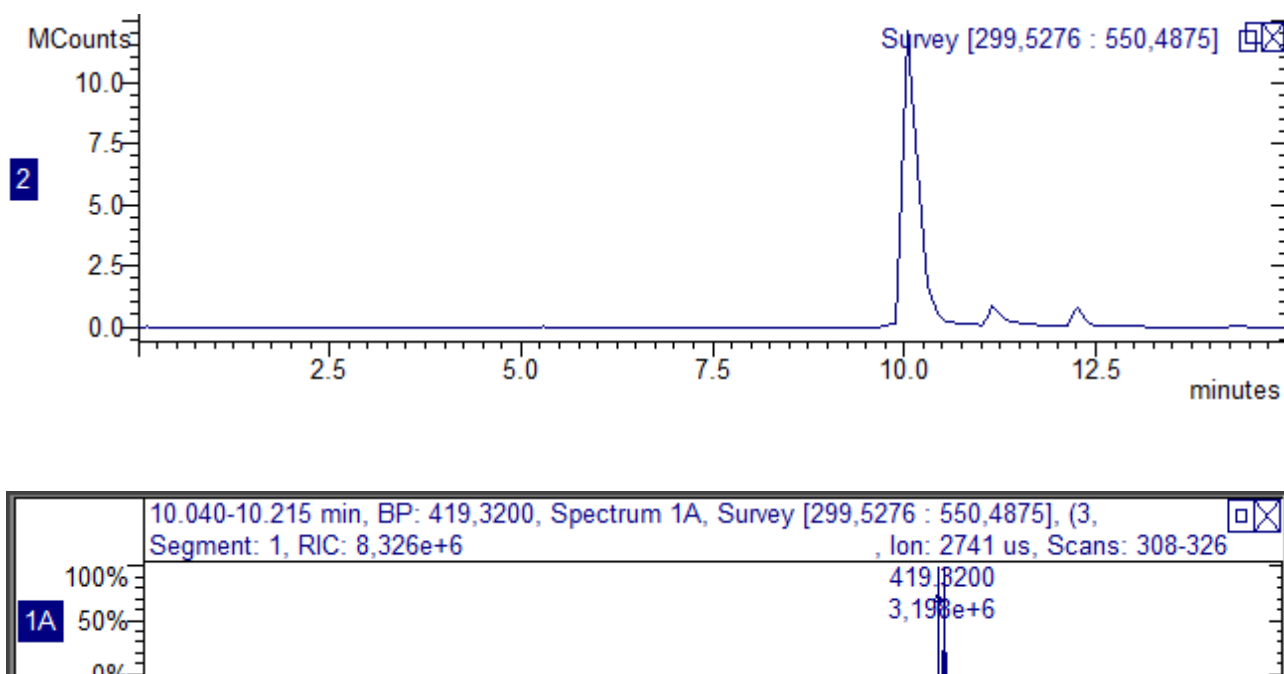

**Figure S72:** Chromatogram and MS spectrum with detail on the isotopic pattern of the bromine compound 6o.

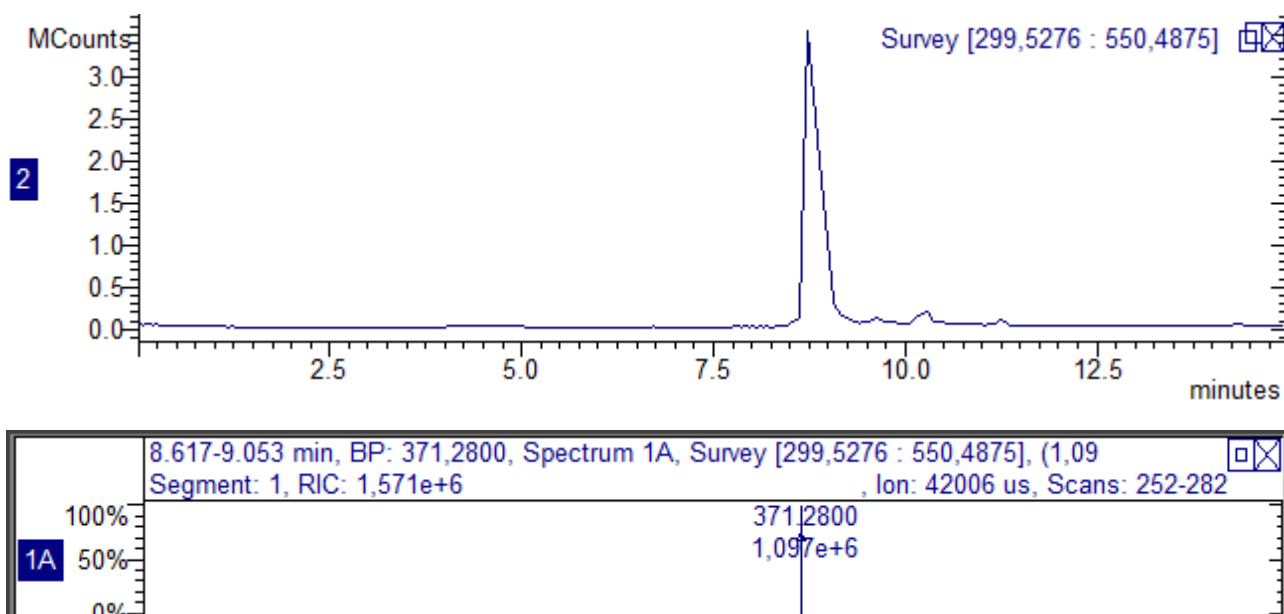

**Figure S73:** Chromatogram and MS spectrum of compound 5p.

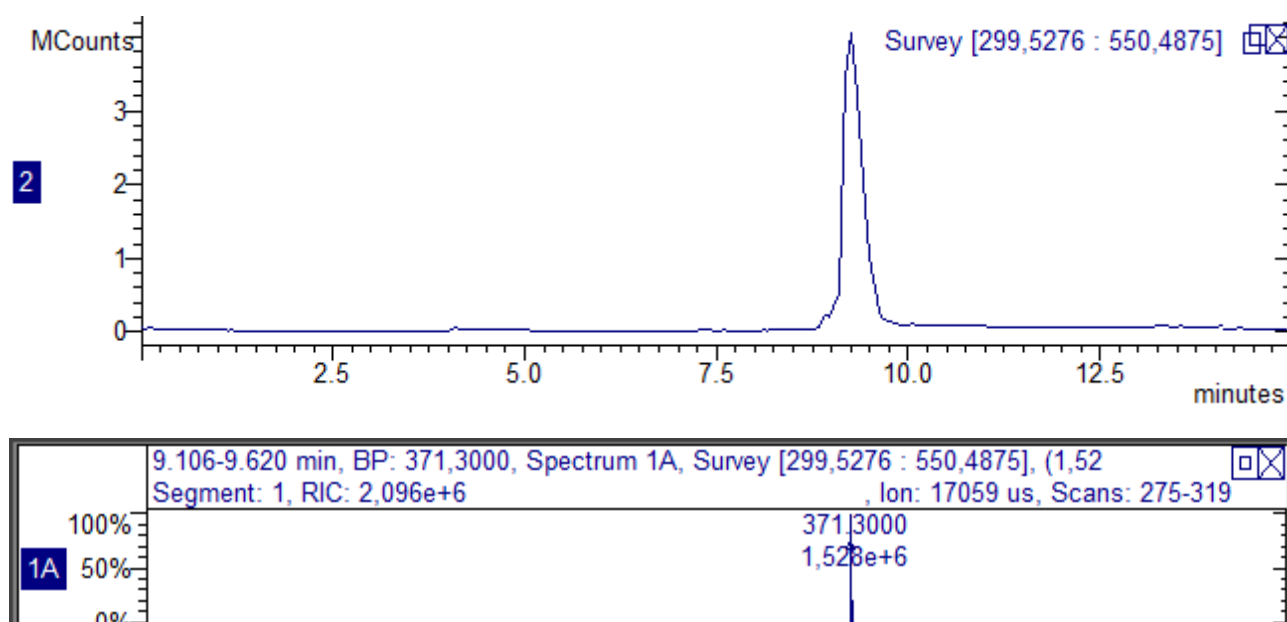

**Figure S74:** Chromatogram and MS spectrum of compound **6p**.

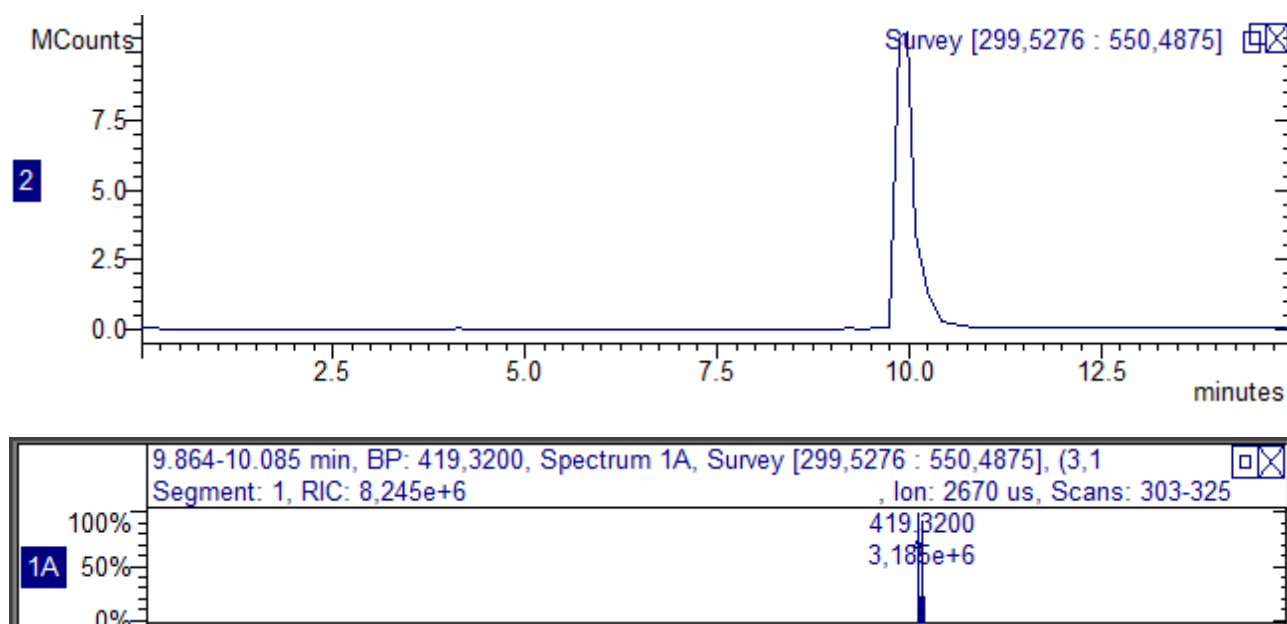

**Figure S75:** Chromatogram and MS spectrum of the compound **5q**.

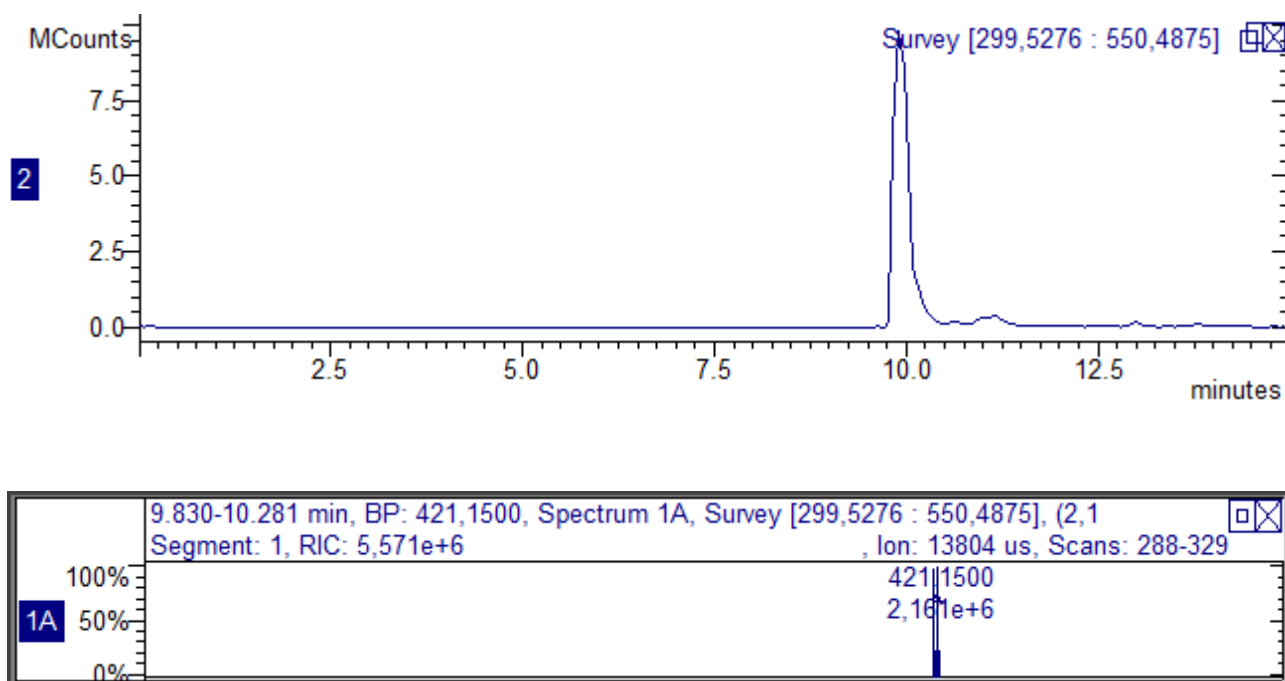

**Figure S76:** Chromatogram and MS spectrum of the compound **6q**.

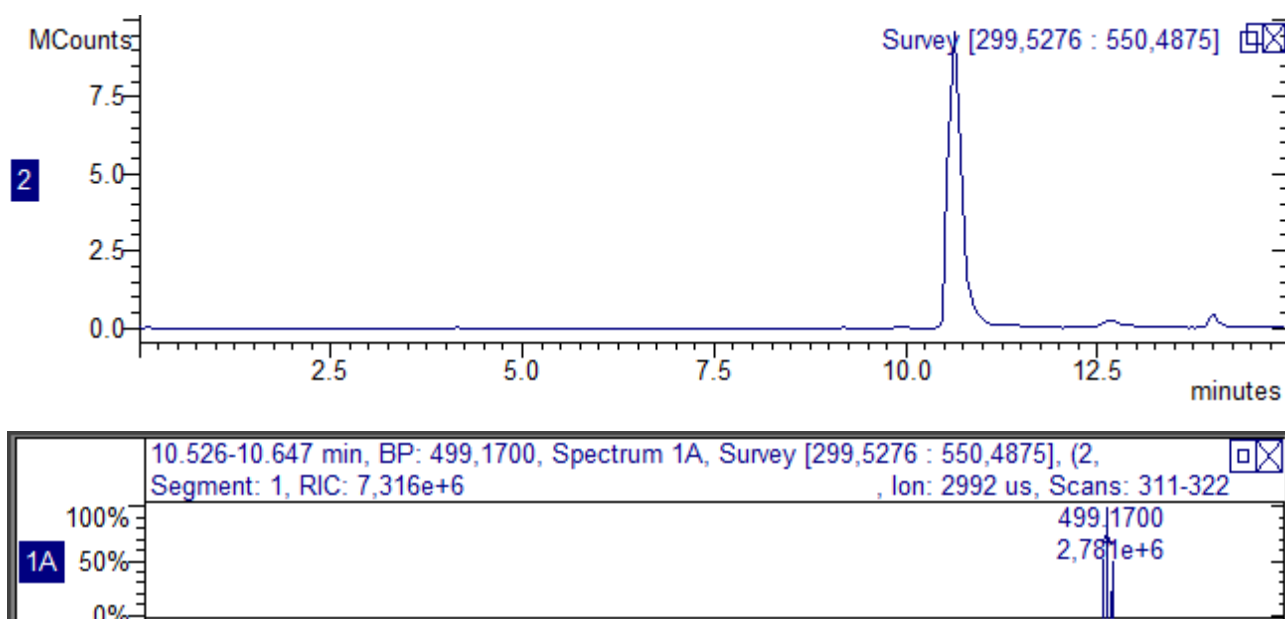

**Figure S77:** Chromatogram and MS spectrum of the compound **5r**.

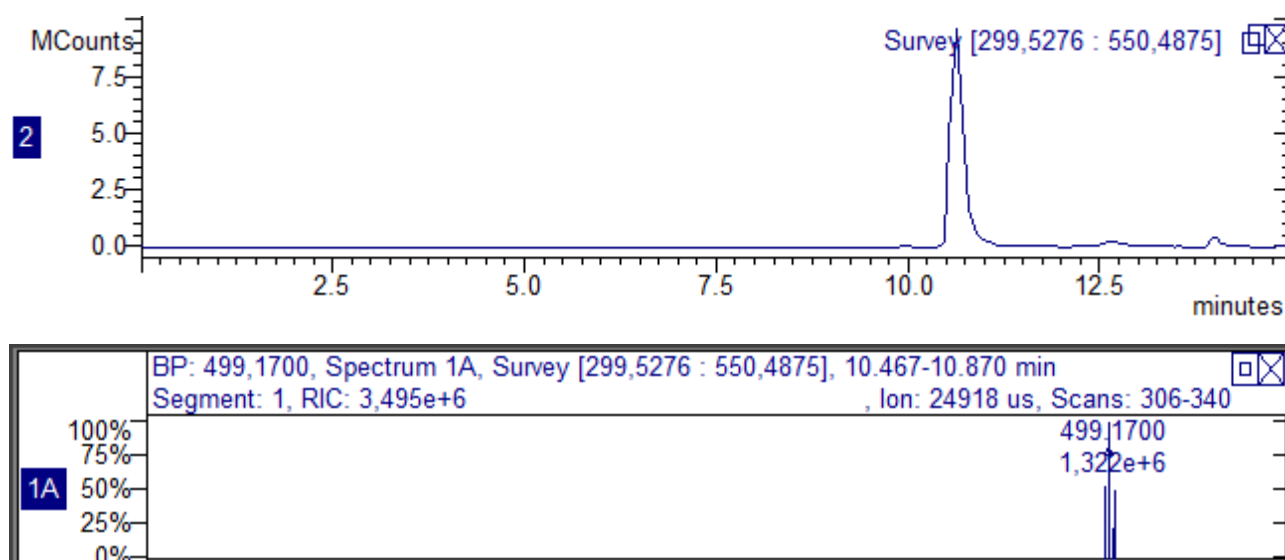

**Figure S78:** Chromatogram and MS spectrum of the compound **6r**.

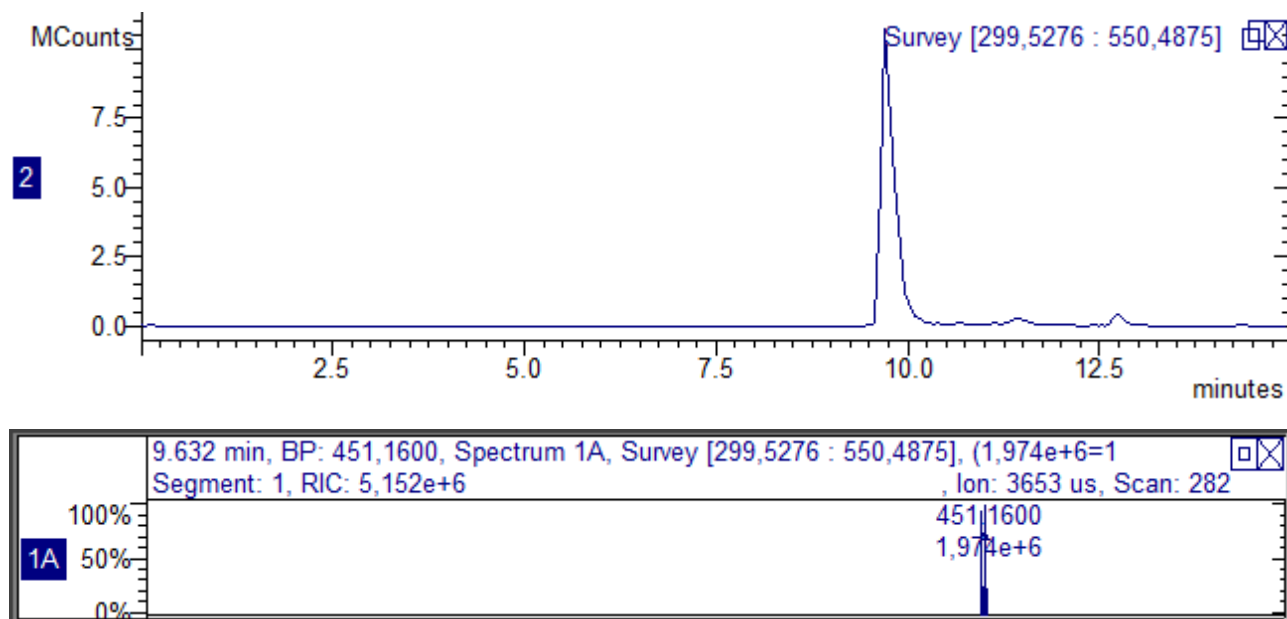

**Figure S79:** Chromatogram and MS spectrum of the compound **5s**.

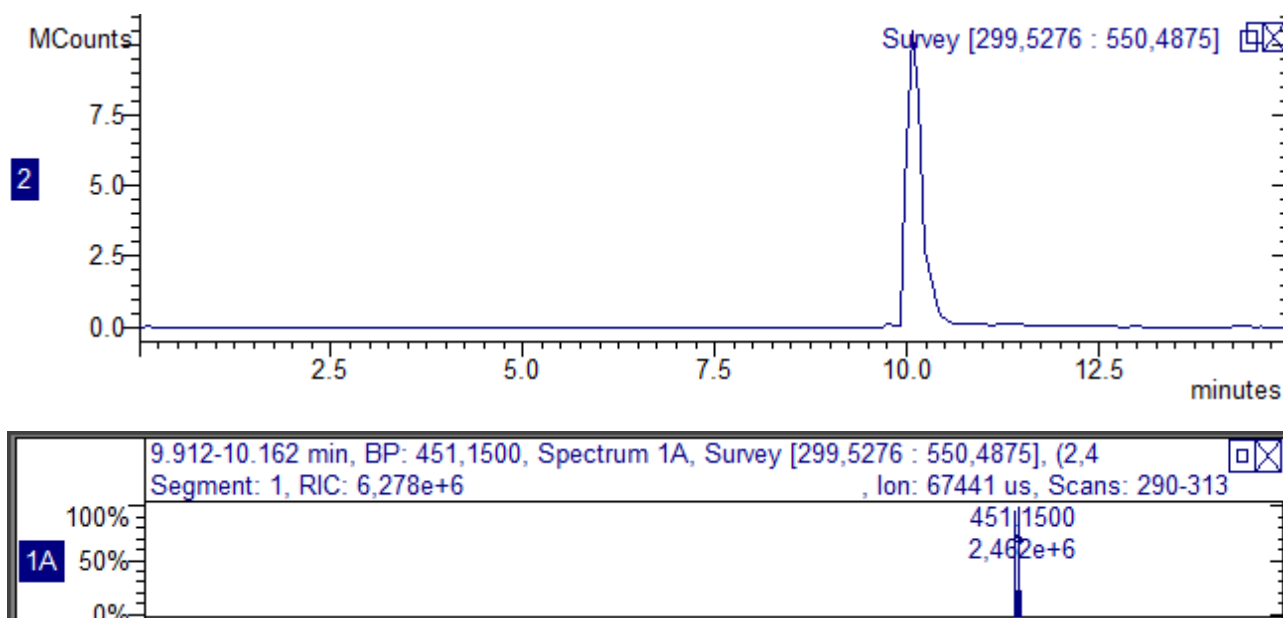

**Figure S80:** Chromatogram and MS spectrum of the compound **6s**.

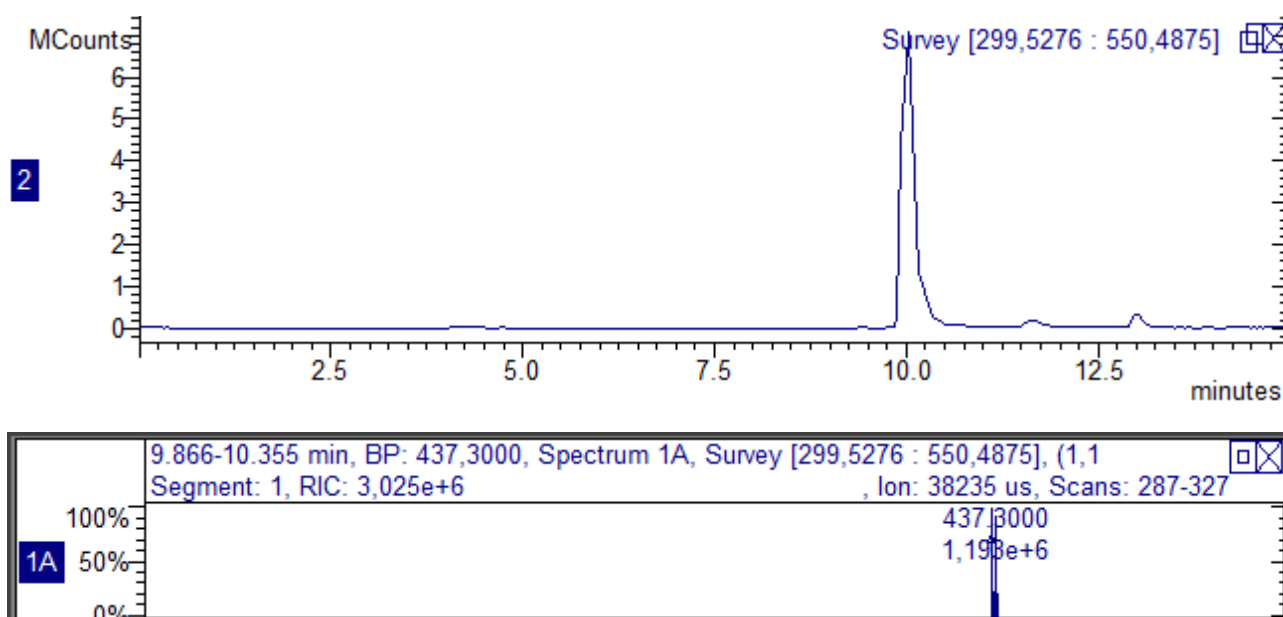

**Figure S81:** Chromatogram and MS spectrum of the compound **5t**.

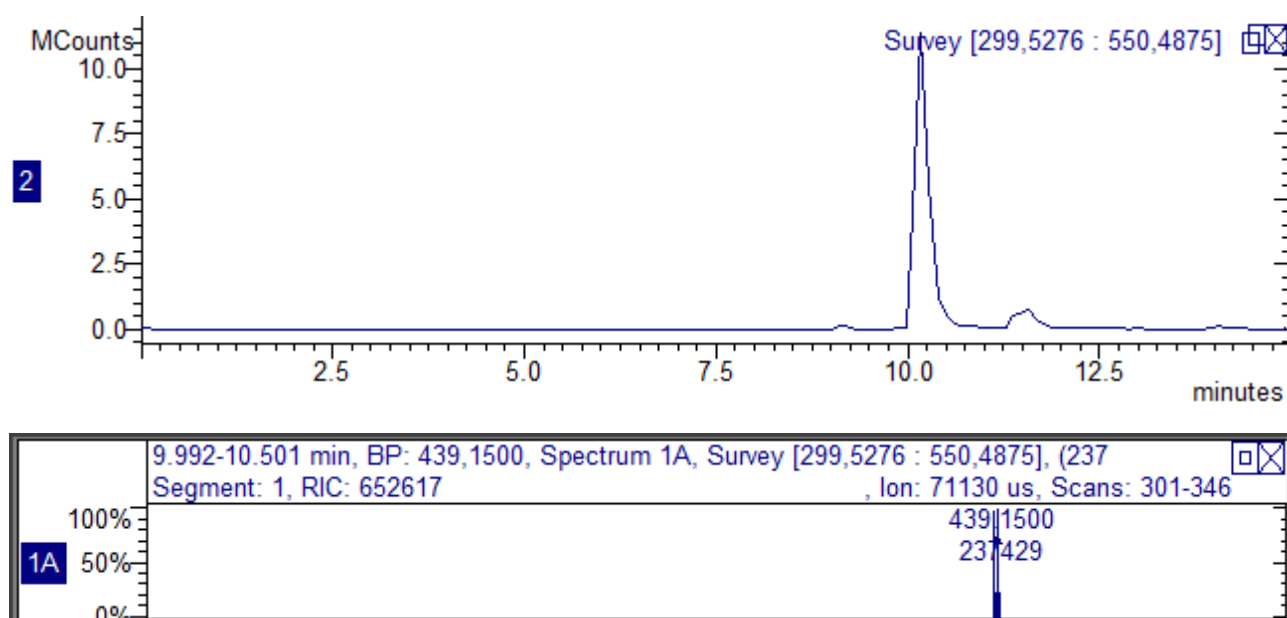

**Figure S82:** Chromatogram and MS spectrum of the compound **6t**.

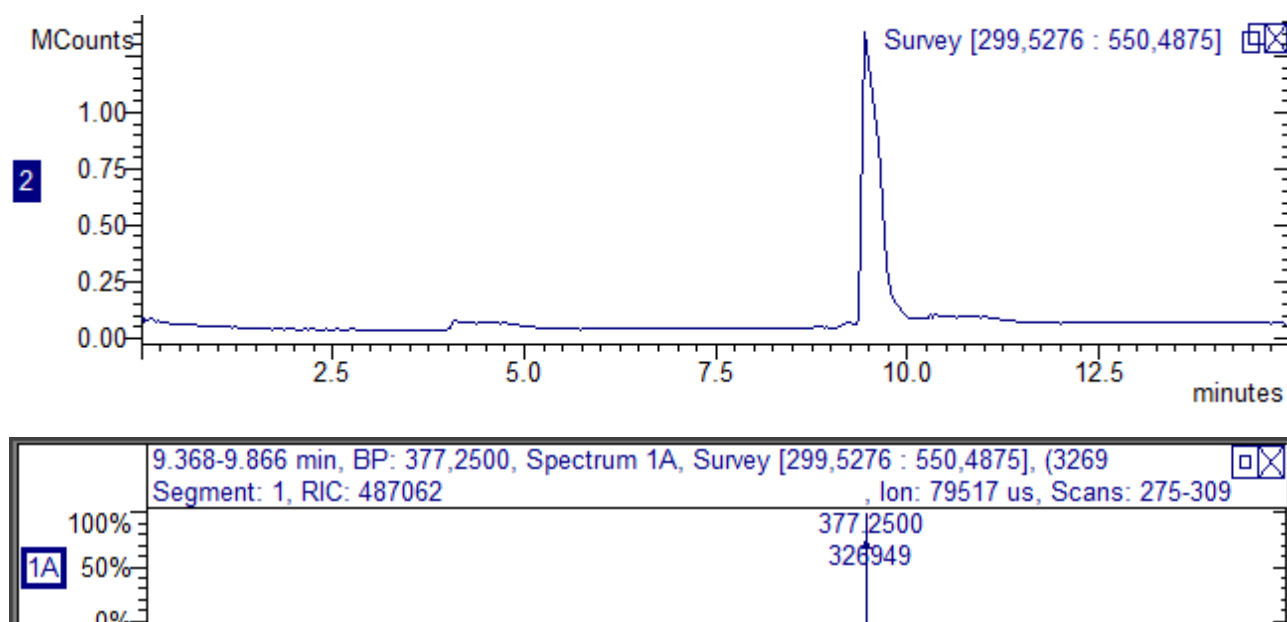

**Figure S83:** Chromatogram and MS spectrum of compound **5u**.



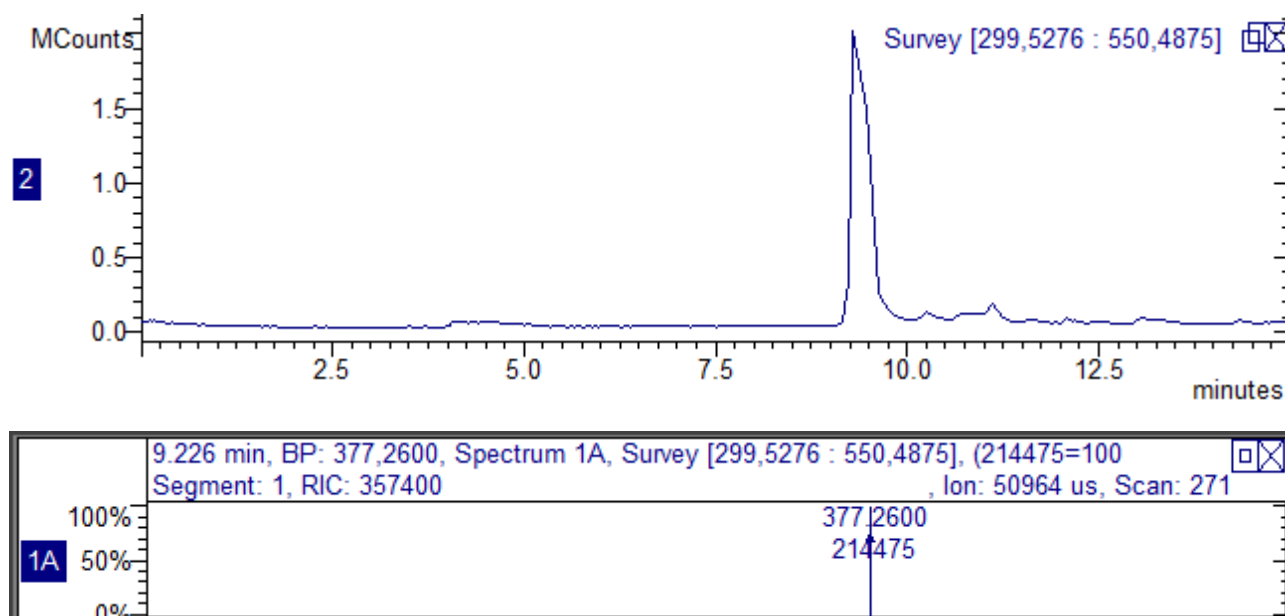

**Figure S84:** Chromatogram and MS spectrum of compound **6u**.

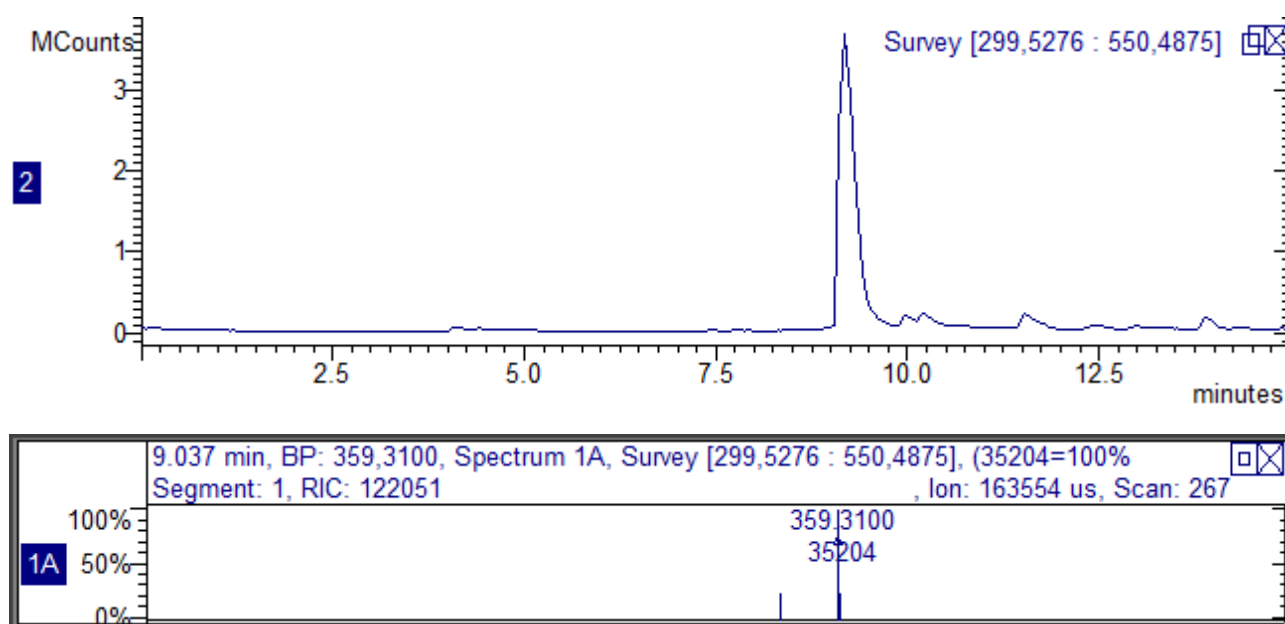

**Figure S85:** Chromatogram and MS spectrum of compound **5v**.

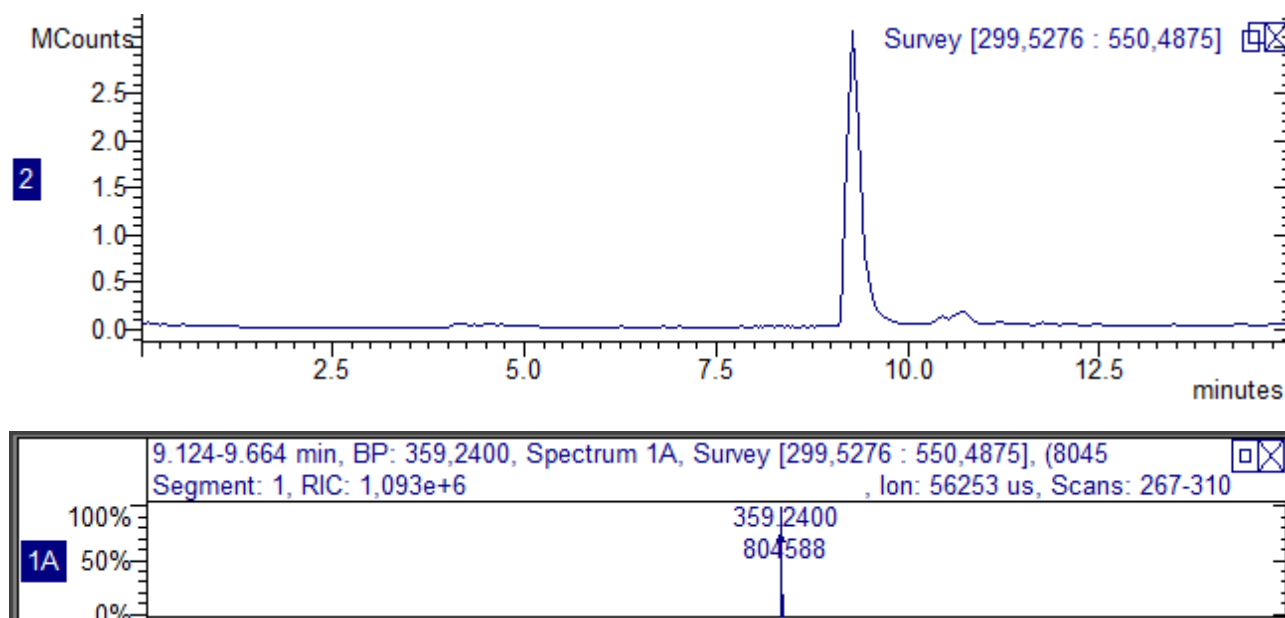

**Figure S86:** Chromatogram and MS spectrum of compound **6v**.

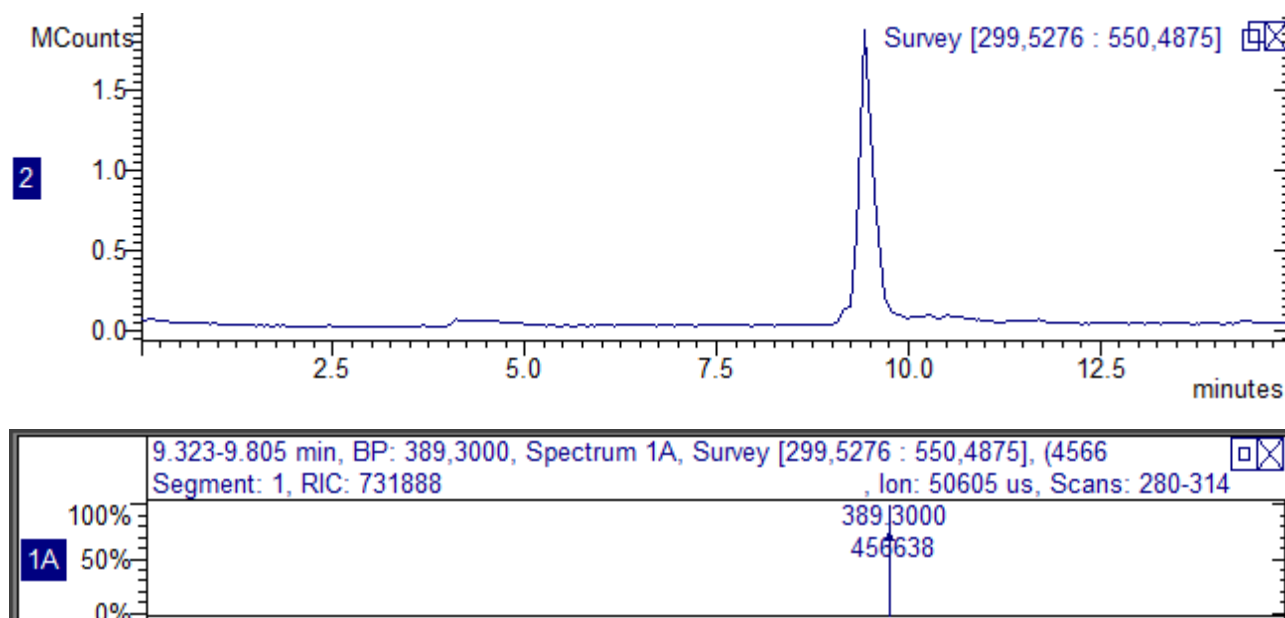

**Figure S87:** Chromatogram and MS spectrum of compound **5w**.

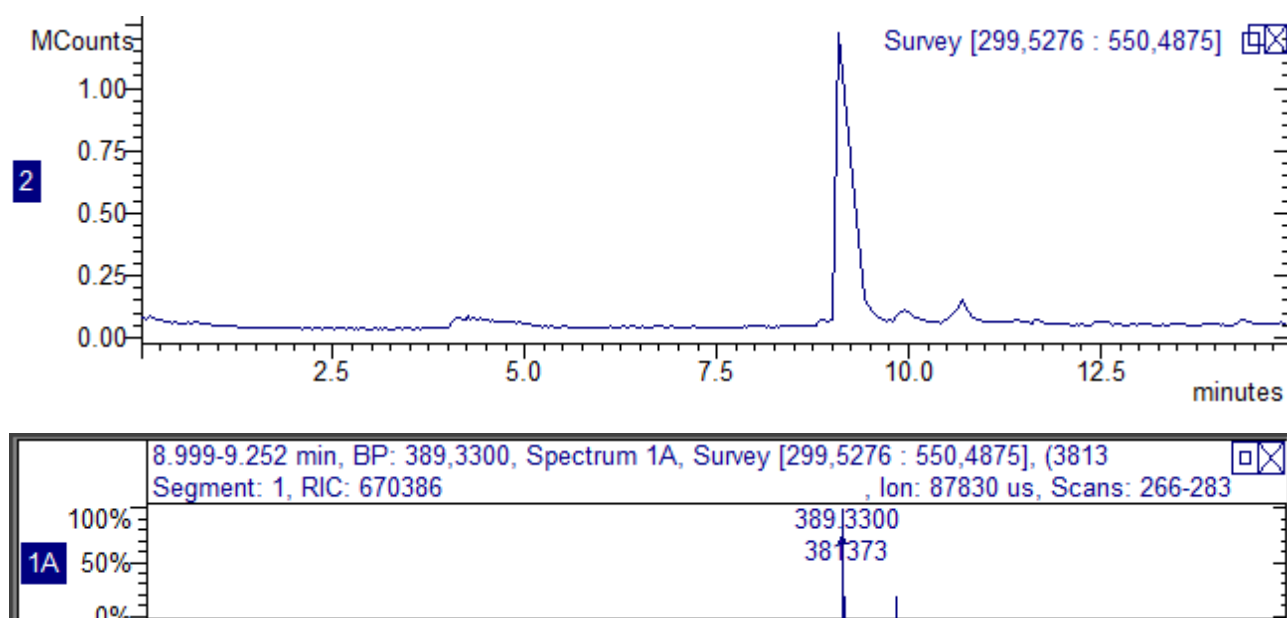

**Figure S88:** Chromatogram and MS spectrum of compound **6w**.

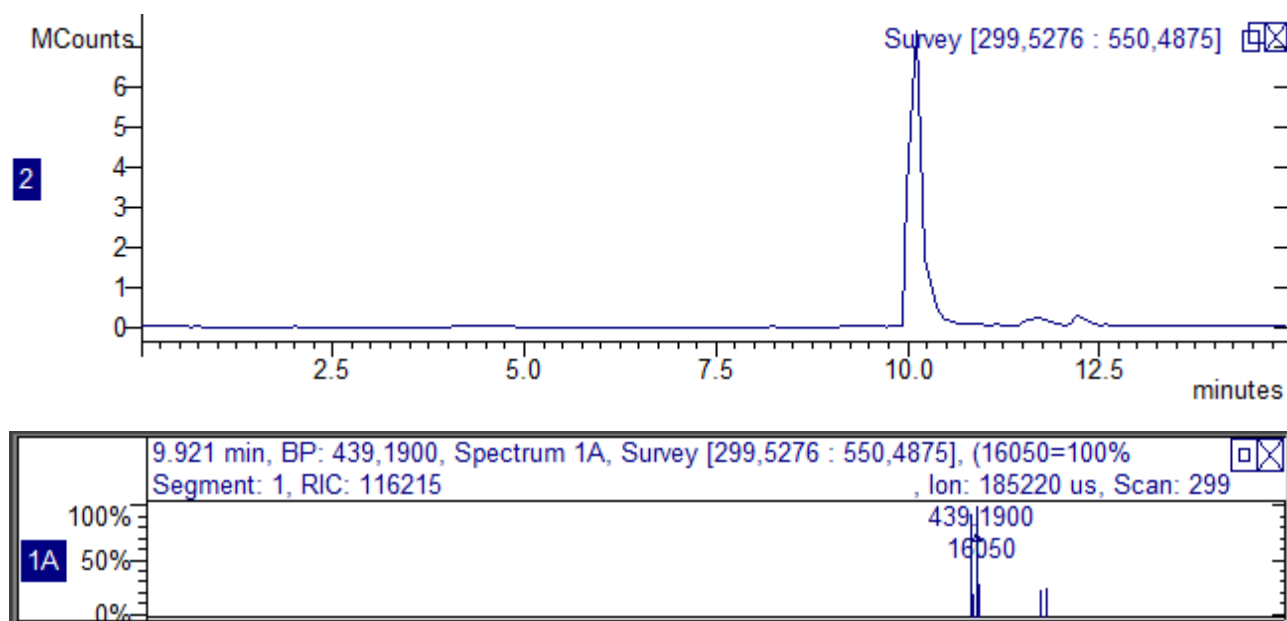

**Figure S89:** Chromatogram and MS spectrum of the compound **5x**.

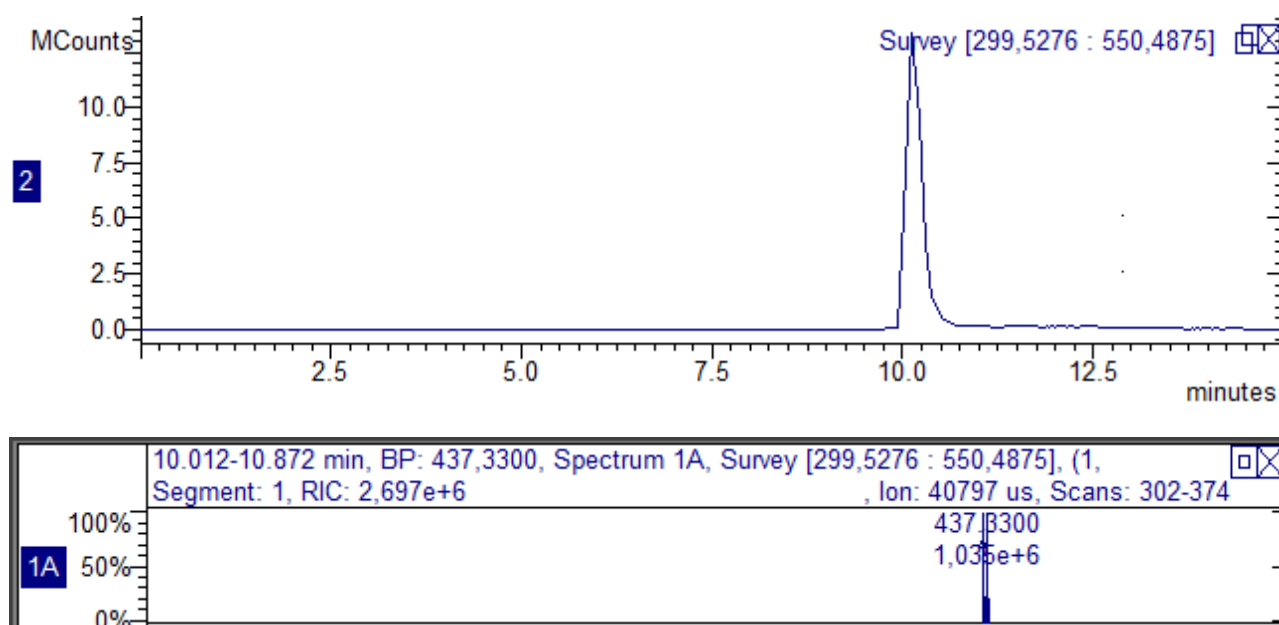

**Figure S90:** Chromatogram and MS spectrum of the compound **6x**.

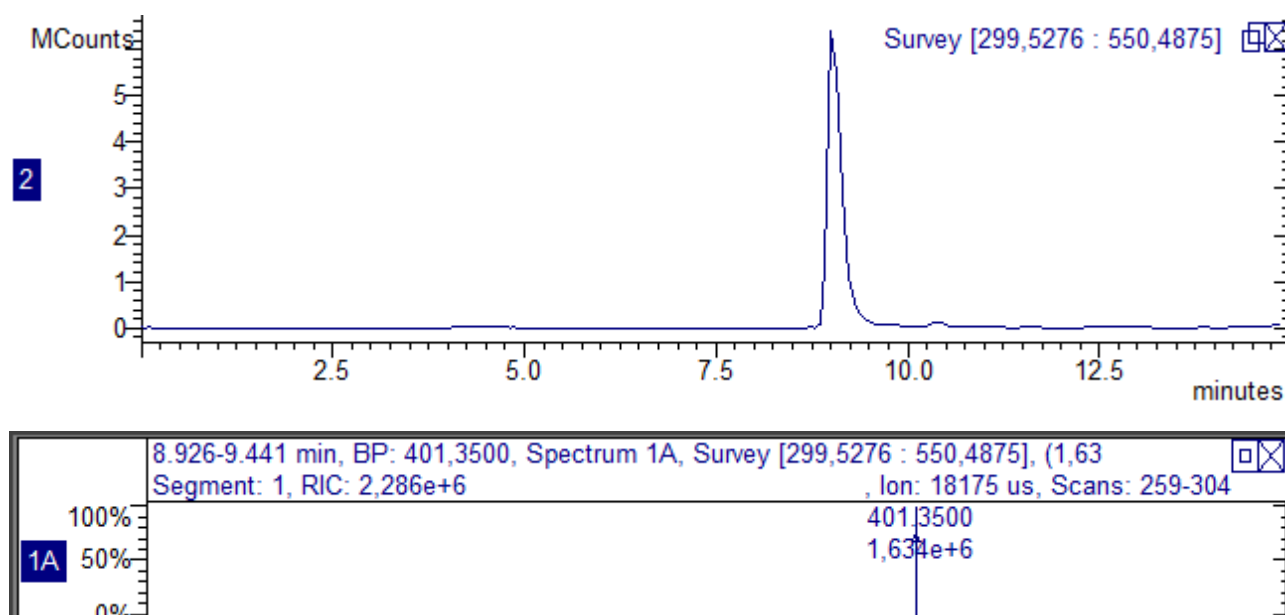

**Figure S91:** Chromatogram and MS spectrum of compound **5y**.

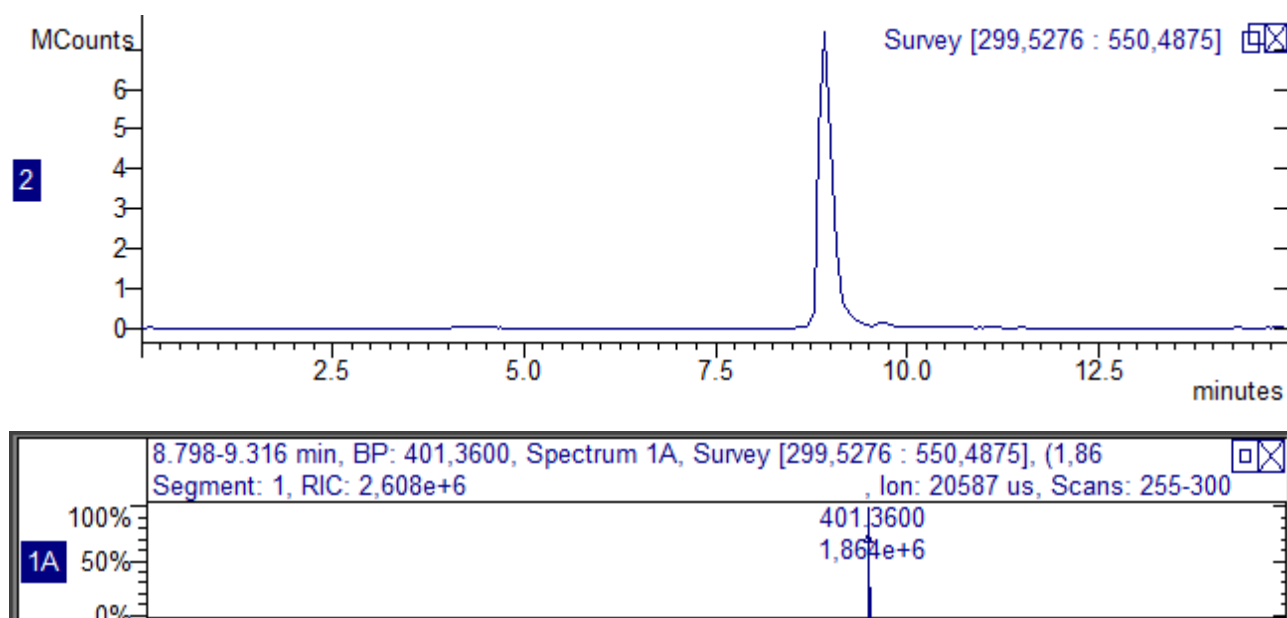

**Figure S92:** Chromatogram and MS spectrum of compound **6y**.

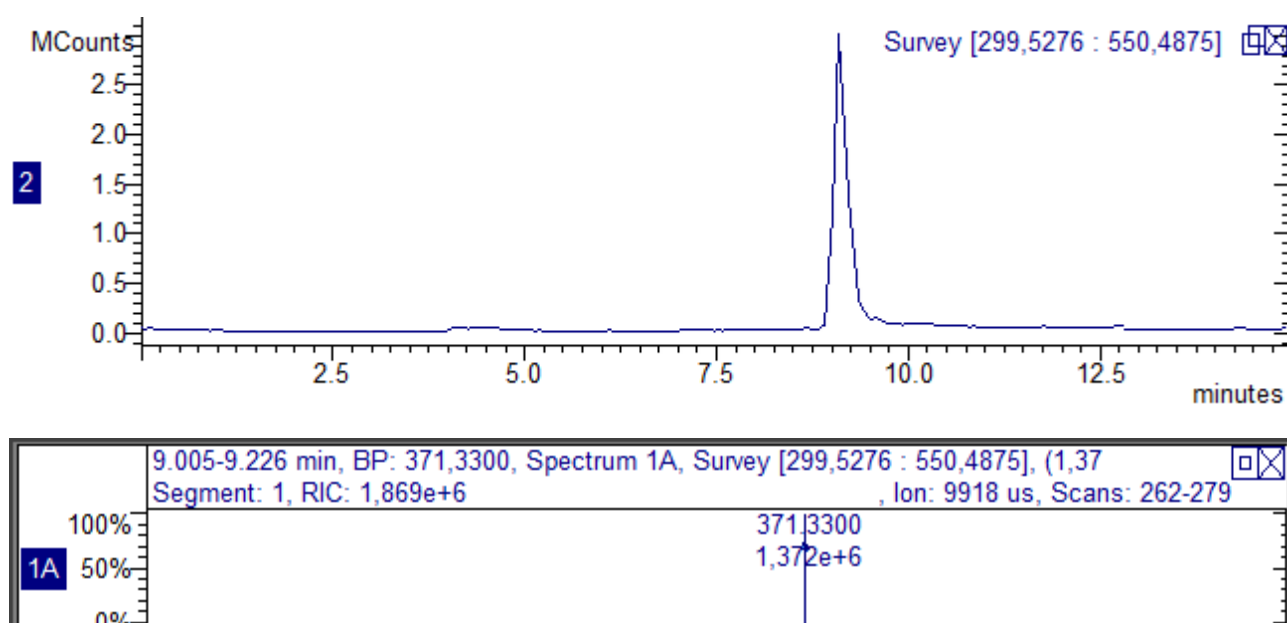

**Figure S93:** Chromatogram and MS spectrum of compound **5z**.

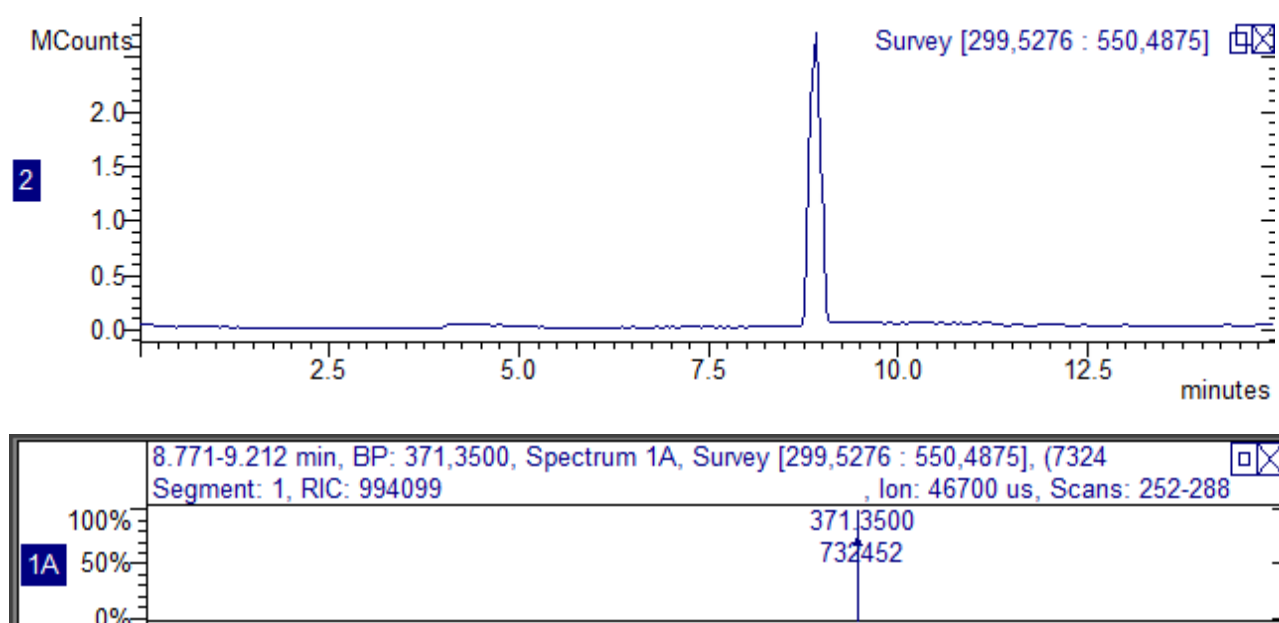

**Figure S94:** Chromatogram and MS spectrum of compound **6z**.

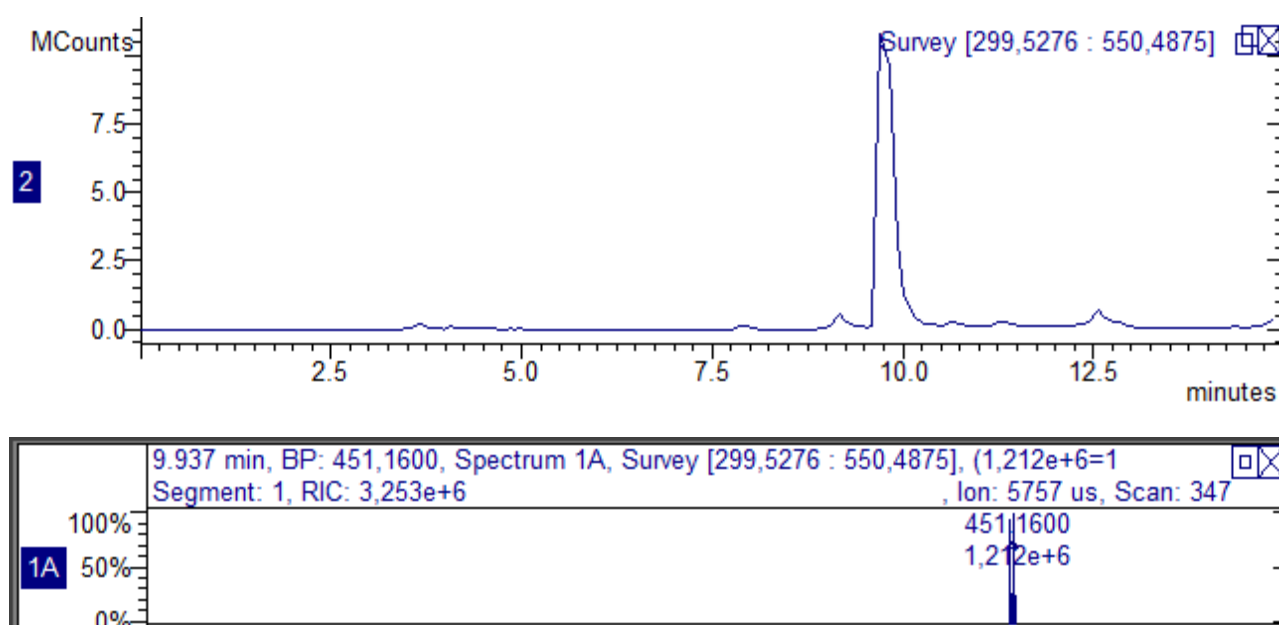

**Figure S95:** Chromatogram and MS spectrum of the compound **5aa**.

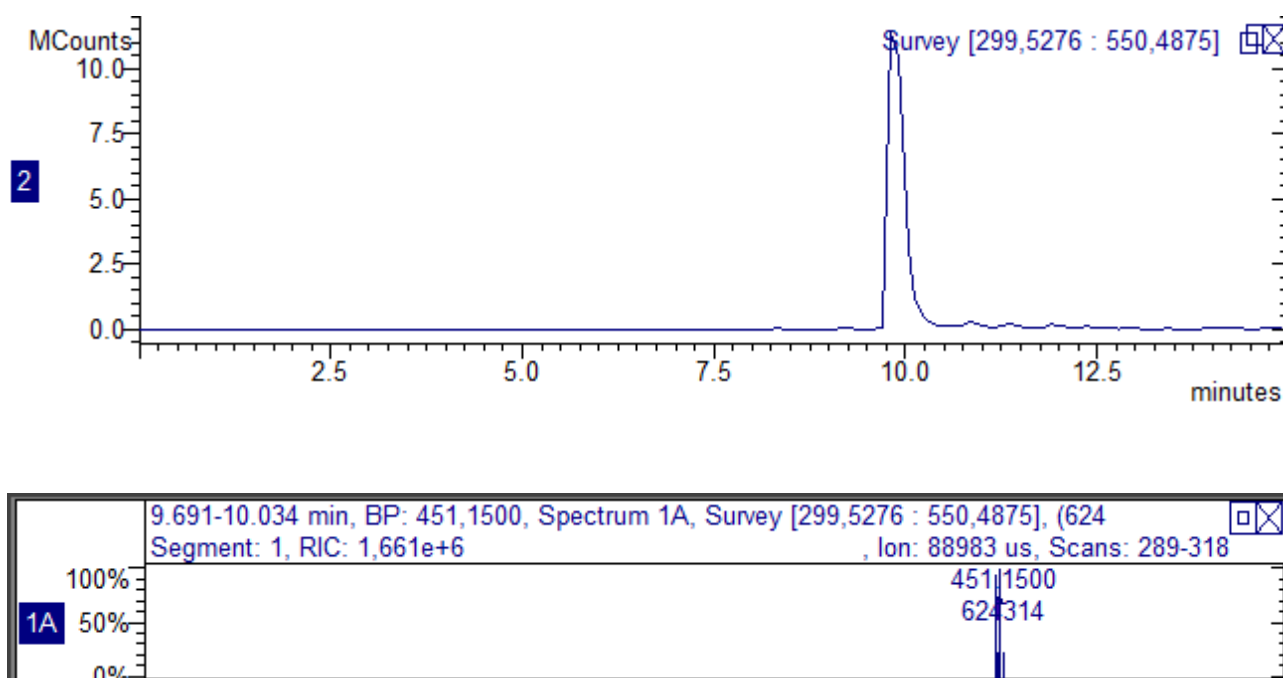

**Figure S96:** Chromatogram and MS spectrum of the compound **6aa**.

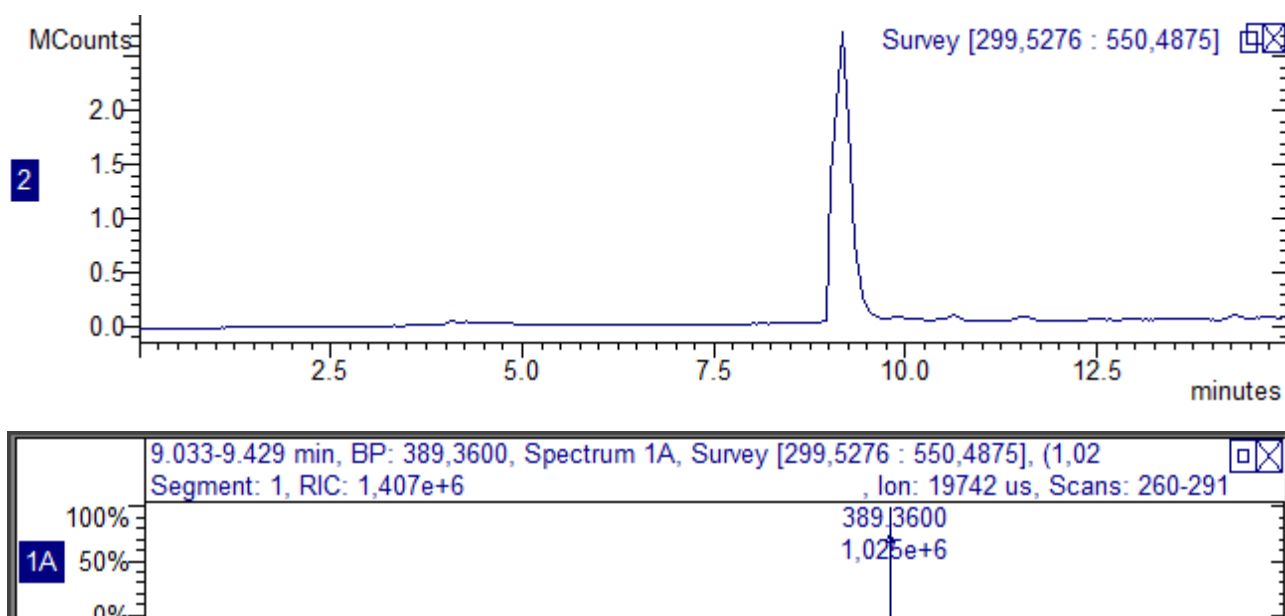

**Figure S97:** Chromatogram and MS spectrum of compound **5ab**.

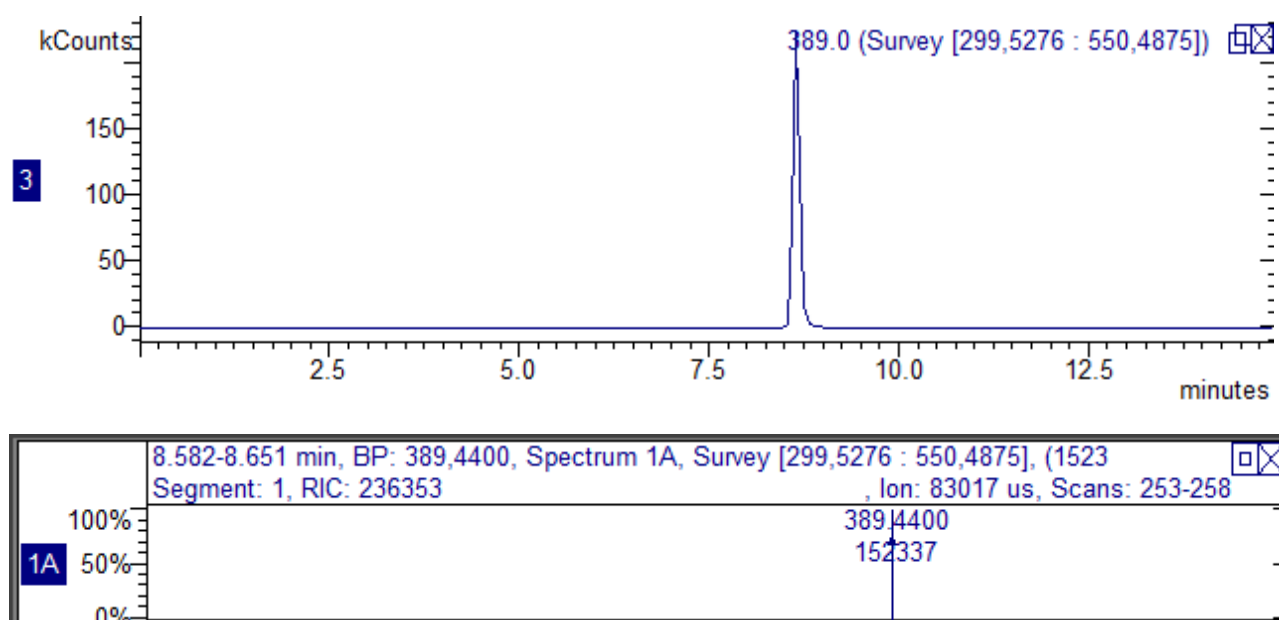

**Figure S98:** Chromatogram and MS spectrum of compound **6ab**.



**Table S2.** Antiproliferative activity of compounds **5a-ab** and **6h-ab** against PSN-1 and BxPC3 cancer cells evaluated in a 2D cytotoxicity assay.

| Compound    | IC <sub>50</sub> (μM) ± S.D. | IC <sub>50</sub> (μM) ± S.D. | Compound    | IC <sub>50</sub> (μM) ± S.D. | IC <sub>50</sub> (μM) ± S.D. |
|-------------|------------------------------|------------------------------|-------------|------------------------------|------------------------------|
|             | PSN-1                        | BxPC3                        |             | PSN-1                        | BxPC3                        |
| 5a          | 1.1±0.6                      | 0.9±0.3                      | 6h          | 3.1±0.5                      | 2.7±0.4                      |
| 5b          | 0.5±0.2                      | 0.4±0.1                      | 6i          | 1.2±0.2                      | 1.0±0.4                      |
| 5c          | 1.5±0.2                      | 1.1±0.3                      | 6j          | 0.6±0.1                      | 0.2±0.04                     |
| 5d          | 0.30±0.04                    | 0.4±0.1                      | 6k          | 1.7±0.5                      | 1.0±0.2                      |
| 5e          | 2.8±0.3                      | 2.4±0.6                      | 6l          | 1.0±0.1                      | 0.8±0.2                      |
| 5f          | 0.7±0.3                      | 0.5±0.2                      | 6m          | 6.5±1.1                      | 4.9±0.7                      |
| 5g          | 0.6±0.1                      | 0.5±0.2                      | 6n          | 1.1±0.3                      | 2.6±0.4                      |
| 5h          | 2.7±0.6                      | 2.4±0.5                      | 6o          | 0.40±0.04                    | 0.30±0.03                    |
| 5i          | 3.5±0.8                      | 3.1±0.5                      | 6p          | 2.3±0.6                      | 1.6±0.5                      |
| 5j          | 0.4±0.1                      | 0.10±0.04                    | 6q          | 1.2±0.2                      | 2.5±0.3                      |
| 5k          | 2.8±0.3                      | 2.4±0.5                      | 6r          | 0.8±0.1                      | 0.6±0.1                      |
| 5l          | 2.8±0.4                      | 2.3±0.7                      | 6s          | 1.1±0.2                      | 1.8±0.2                      |
| 5m          | 4.6±1.2                      | 3.5±0.8                      | 6t          | 1.1±0.2                      | 1.7±0.6                      |
| 5n          | 1.2±0.2                      | 2.2±0.7                      | 6u          | 5.3±0.4                      | 4.7±0.6                      |
| 5o          | 0.5±0.1                      | 0.20±0.03                    | 6v          | 0.20±0.03                    | 0.10±0.02                    |
| 5p          | 1.1±0.1                      | 0.9±0.2                      | 6w          | 0.8±0.2                      | 0.30±0.04                    |
| 5q          | 1.1±0.3                      | 1.6±0.4                      | 6x          | 0.30±0.04                    | 0.3±0.1                      |
| 5r          | 0.7±0.1                      | 0.50±0.04                    | 6y          | 0.60±0.04                    | 0.3±0.1                      |
| 5s          | 0.5±0.2                      | 2.2±0.6                      | 6z          | 1.8±0.5                      | 1.5±0.4                      |
| 5t          | 0.4±0.1                      | 1.4±0.2                      | 5ab         | 1.6±0.7                      | 1.5±0.6                      |
| 5u          | 1.0±0.2                      | 0.80±0.02                    | 6ab         | 1.6±0.7                      | 1.5±0.6                      |
| 5v          | 0.20±0.04                    | 0.20±0.03                    | Gemcitabine | 0.10±0.04                    | 0.020±0.003                  |
| 5w          | 0.8±0.3                      | 0.2±0.03                     | DCA         | >1000                        | >1000                        |
| 5x          | 0.3±0.1                      | 0.2±0.04                     | DAP         | 10.2±1.6                     | 16.5±0.9                     |
| 5y          | 0.7±0.1                      | 0.40±0.03                    |             |                              |                              |
| 5z          | 1.4±0.4                      | 1.1±0.3                      |             |                              |                              |
| 5aa         | 1.3±0.3                      | 1.2±0.6                      |             |                              |                              |
| 5ab         | 3.2±0.7                      | 2.8±0.9                      |             |                              |                              |
| Gemcitabine | 0.10±0.04                    | 0.020±0.003                  |             |                              |                              |
| DCA         | >1000                        | >1000                        |             |                              |                              |
| DAP         | 10.2±1.6                     | 16.5±0.9                     |             |                              |                              |

Cells ( $3 \times 10^3$ ) were treated for 72 h with increasing concentrations of tested compounds. Cytotoxicity was assessed by MTT test. IC<sub>50</sub> values were calculated by a four-parameter logistic model ( $P < 0.05$ ). Gemcitabine, DCA and DAP were reported as reference compounds. Data represent mean values from at least 3 independent experiments. S.D.= standard deviation.

**Table S3.** Antiproliferative activity of compounds **5a-ab**, **6h-ab** against PSN-1 and BxPC3 cancer cells evaluated in a 3D cytotoxicity assay.

| Compound    | IC <sub>50</sub> (μM) ± S.D. |           | Compound    | IC <sub>50</sub> (μM) ± S.D. |           |
|-------------|------------------------------|-----------|-------------|------------------------------|-----------|
|             | PSN-1                        | BxPC3     |             | PSN-1                        | BxPC3     |
| 5a          | 58.2±4.1                     | 99.4±4.2  | 6h          | 24.3±1.4                     | 33.4±3.6  |
| 5b          | 32.9±10.2                    | 38.2±3.1  | 6i          | 20.9±4.2                     | 29.3±2.8  |
| 5c          | 43.8±5.1                     | 83.1±4.8  | 6j          | 18.1±2.3                     | 41.2±3.6  |
| 5d          | 25.9±1.3                     | 33.4±3.1  | 6k          | 9.4±0.2                      | 22.3±2.6  |
| 5e          | 32.9±0.5                     | 134.5±6.8 | 6l          | 8.0±0.1                      | 8.8±0.4   |
| 5f          | 32.9±1.7                     | 33.5±4.2  | 6m          | 28.2±2.4                     | 103.1±3.6 |
| 5g          | 5.8±0.8                      | 19.5±2.1  | 6n          | 12.9±2.1                     | 19.1±2.2  |
| 5h          | 44.5±3.6                     | 78.4±4.2  | 6o          | 18.9±3.0                     | 27.4±3.3  |
| 5i          | 4.9±0.8                      | 34.1±1.5  | 6p          | 28.7±2.1                     | 33.6±7.5  |
| 5j          | 10.4±1.6                     | 16.7±2.0  | 6q          | 14.2±1.1                     | 20.7±2.3  |
| 5k          | 15.9±2.3                     | 67.9±3.7  | 6r          | 23.5±2.2                     | 29.4±1.6  |
| 5l          | 8.7±0.5                      | 52.1±3.3  | 6s          | 22.3±2.3                     | 29.2±1.4  |
| 5m          | 29.8±2.9                     | 96.4±5.2  | 6t          | 21.1±2.5                     | 31.1±2.1  |
| 5n          | 21.7±3.4                     | 17.6±2.3  | 6u          | 15.2±3.1                     | 34.5±2.6  |
| 5o          | 10.3±1.3                     | 20.6±1.2  | 6v          | 45.2±4.8                     | 68.1±5.1  |
| 5p          | 15.8±1.4                     | 76.4±4.2  | 6w          | 9.2±0.5                      | 58.1±2.3  |
| 5q          | 8.4±0.5                      | 8.6±0.3   | 6x          | 30.6±3.6                     | 28.7±2.1  |
| 5r          | 36.6±1.5                     | 35.8±2.3  | 6y          | 49.0±2.7                     | 37.7±4.1  |
| 5s          | 14.7±2.1                     | 56.5±4.7  | 6z          | 19.5±2.6                     | 19.3±3.6  |
| 5t          | 25.7±1.7                     | 31.1±2.8  | 6aa         | 25.3±1.8                     | 28.3±2.5  |
| 5u          | 9.2±0.7                      | 16.6±0.02 | 6ab         | 118.2±8.2                    | 61.9±4.2  |
| 5v          | 28.1±3.4                     | 56.8±3.9  | Gemcitabine | 159.5±5.6                    | 102.6±6.3 |
| 5w          | 15.3±2.8                     | 12.2±1.3  | DCA         | >1000                        | >1000     |
| 5x          | 26.3±4.3                     | 26.2±2.4  | DAP         | 78.2±6.2                     | 87.4±8.9  |
| 5y          | 40.1±3.4                     | 35.3±2.3  |             |                              |           |
| 5z          | 19.2±3.5                     | 19.2±3.5  |             |                              |           |
| 5aa         | 54.4±2.7                     | 49.2±2.6  |             |                              |           |
| 5ab         | 131.5±7.6                    | 69.8±3.6  |             |                              |           |
| Gemcitabine | 159.5±5.6                    | 102.6±6.3 |             |                              |           |
| DCA         | >1000                        | >1000     |             |                              |           |
| DAP         | 78.2±6.2                     | 87.4±8.9  |             |                              |           |

Spheroids (2.5×10<sup>3</sup> cells/well) were treated for 72 h with increasing concentrations of tested compounds. The growth-inhibitory effect was evaluated by means of the acid phosphatase (APH) test. IC<sub>50</sub> values were calculated from the dose-survival curves using a four-parameter logistic model (p < 0.05). SD = standard deviation.

Protein: HSP90 Crystal: 5J64

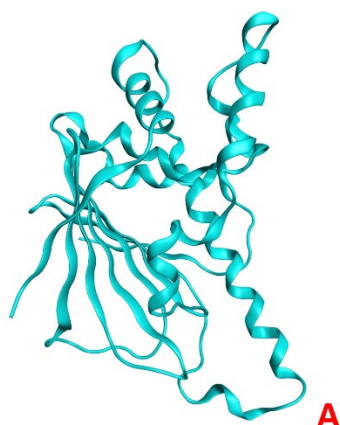

Protein: PDK1 Crystal: 2Q8F

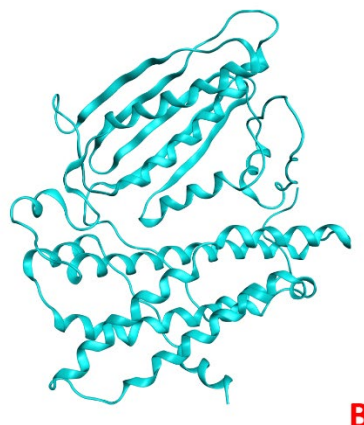

**Figure S99.** **Panel A)** Depiction of the HSP90 crystallographic structure with PDB code 5J64, which was the one considered in this study. **Panel B)** Representation of the PDK1 crystallographic structure with PDB code 2Q8F, which was the one considered in this study. The images were created and rendered with MOE.

HSP90 – (6h) best pose

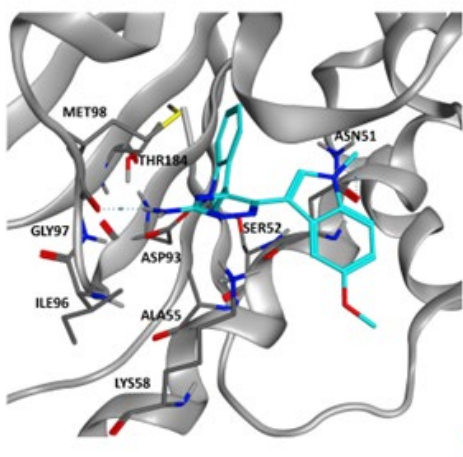

HSP90 – (5x) best pose

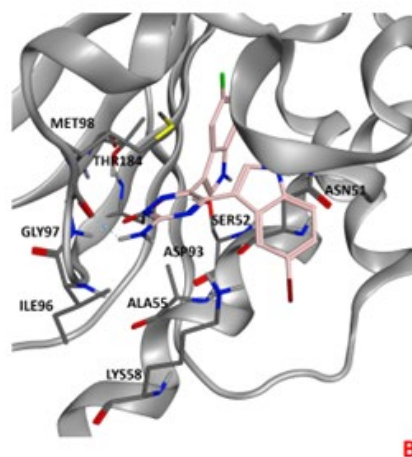

**Figure S100.** Representation of the binding conformation of the two compounds that we chose as a reference for our computational evaluation in the HSP90 orthosteric binding site. **Panel A)** depiction of the selected pose produced by PLANTS for the compound **6h** (colored in cyan), which passes through the steric, the electrostatic, and the 3D-pharmacophore filtering. **Panel B)** illustration of the selected pose produced by PLANTS for the ligand **5x** (colored in pink) which passes through the steric, the electrostatic, and the 3D-pharmacophore filtering. The images were created and rendered with MOE.

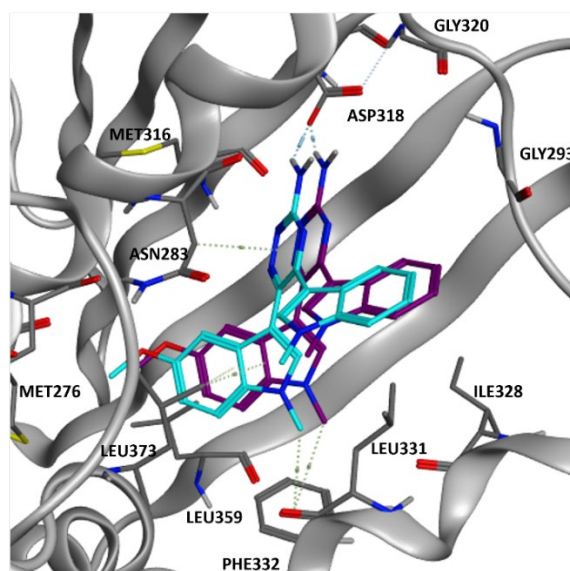

**Figure S101.** Representation of the superimposition of the best pose obtained for compound **6h** (colored in cyan) and the originally placed conformation (colored in purple), which was used to create the ligand-based homology model. The very low value of RMSD (0.87 Å) gives credit to this binding hypothesis.

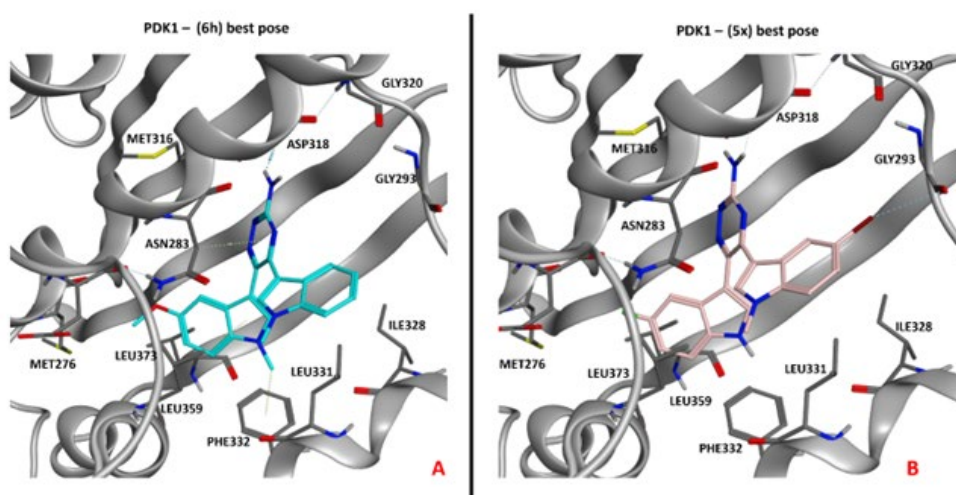

**Figure S102.** Depiction of the best poses of the two compounds chosen as the reference for our study in the PDK1 ATP-binding site. **Panel A)** representation of the chosen pose produced by PLANTS for the potent ligand **6h**, (colored in cyan), which passes both the steric and electrostatic filtering process. **Panel B)** picture showing the chosen pose produced by PLANTS for the ligand **5x**, (colored in pink) which passes both the steric and electrostatic filtering process. The images were created and rendered with MOE.
